# Supplementary material for: PI3Kδ Forms Distinct Multiprotein Complexes at the TCR Signalosome in Naïve and Differentiated CD4+ T Cells
Source: Front Immunol. 2021 Mar 8;12:631271. doi: 10.3389/fimmu.2021.631271 (PMC7982423; doi:10.3389/fimmu.2021.631271)
Supplement: Supplementary file 4 [file Data_Sheet_3.XLSX]

## Sheet: Proteins_HighConfID&Quant
UniProt Accession	Gene Name		Description	% sequence coverage	# Peptides	# PSMs	# Unique Peptides	# AAs	MW [kDa]	calc. pI	missing values	contaminant	mv or contam	Abundance Ratio: (127C) / (126) nT1-delta-stim/nT1-C-stim	Abundance Ratio: (128N) / (126) nT2-C-stim/nT1-C-stim	Abundance Ratio: (129N) / (126) nT2-delta-stim/nT1-C-stim	Abundance Ratio: (129C) / (126) nT3-C-stim/nT1-C-stim	Abundance Ratio: (130C) / (126) nT3-delta-stim/nT1-C-stim	Abundance Ratio: (127N) / (131) nT1-delta-un/nT1-C-un	Abundance Ratio: (128C) / (131) nT2-delta-un/nT1-C-un	Abundance Ratio: (130N) / (131) nT3-delta-un/nT1-C-un		Abundances (Normalized): F28: 126, Sample, nT1-C-stim	Abundances (Normalized): F28: 127N, Sample, nT1-delta-un	Abundances (Normalized): F28: 127C, Sample, nT1-delta-stim	Abundances (Normalized): F28: 128N, Sample, nT2-C-stim	Abundances (Normalized): F28: 128C, Sample, nT2-delta-un	Abundances (Normalized): F28: 129N, Sample, nT2-delta-stim	Abundances (Normalized): F28: 129C, Sample, nT3-C-stim	Abundances (Normalized): F28: 130N, Sample, nT3-delta-un	Abundances (Normalized): F28: 130C, Sample, nT3-delta-stim	Abundances (Normalized): F28: 131, Sample, nT1-C-un
P02535	Krt10	PE	Keratin, type I cytoskeletal 10 OS=Mus musculus GN=Krt10 PE=1 SV=3	19.1228	12	188	1	570	57.735	5.11	Y	Y	Y
Q61781	Krt14	PE	Keratin, type I cytoskeletal 14 OS=Mus musculus GN=Krt14 PE=1 SV=2	44.8347	21	80	3	484	52.834	5.17	Y	Y	Y
Q6NXH9	Krt73	PE	Keratin, type II cytoskeletal 73 OS=Mus musculus GN=Krt73 PE=1 SV=1	16.8831	12	130	3	539	58.875	8.09	Y	Y	Y
Q9Z2T6	Krt85	PE	Keratin, type II cuticular Hb5 OS=Mus musculus GN=Krt85 PE=1 SV=2	15.9763	9	39	3	507	55.723	6.42	Y	Y	Y
P83917	Cbx1	PE	Chromobox protein homolog 1 OS=Mus musculus GN=Cbx1 PE=1 SV=1	12.973	2	4	1	185	21.405	4.93	Y		Y
Q99J95	Cdk9	PE	Cyclin-dependent kinase 9 OS=Mus musculus GN=Cdk9 PE=1 SV=1	7.25806	3	4	1	372	42.734	8.79	Y		Y
Q8BK63	Csnk1a1	PE	Casein kinase I isoform alpha OS=Mus musculus GN=Csnk1a1 PE=1 SV=2	6.23145	1	1	1	337	38.89	9.57	Y		Y
Q07813	Bax	PE	Apoptosis regulator BAX OS=Mus musculus GN=Bax PE=1 SV=1	6.77083	1	2	1	192	21.381	4.98	Y		Y
Q91ZR1	Rab4b	PE	Ras-related protein Rab-4B OS=Mus musculus GN=Rab4b PE=1 SV=2	9.85915	2	3	1	213	23.614	6.06	Y		Y
Q9DA97	Sept14	PE	Septin-14 OS=Mus musculus GN=Sept14 PE=1 SV=3	5.34884	2	3	1	430	49.779	7.27	Y		Y
Q6ZWM4	Lsm8	PE	U6 snRNA-associated Sm-like protein LSm8 OS=Mus musculus GN=Lsm8 PE=1 SV=3	26.0417	2	2	2	96	10.396	4.48	Y		Y
Q9DCS2	1	SV	UPF0585 protein C16orf13 homolog OS=Mus musculus PE=1 SV=1	8.82353	1	1	1	204	22.673	6.52	Y		Y
Q6ZQ03	Fnbp4	PE	Formin-binding protein 4 OS=Mus musculus GN=Fnbp4 PE=1 SV=2	1.55189	1	1	1	1031	111.177	4.73	Y		Y
A2A654	Bptf	PE	Bromodomain PHD finger transcription factor OS=Mus musculus GN=Bptf PE=1 SV=1	0.6917	1	1	1	3036	333.022	6.83	Y		Y
O70279	Dgcr14	PE	Protein DGCR14 OS=Mus musculus GN=Dgcr14 PE=1 SV=2	2.50522	1	1	1	479	52.572	6.7	Y		Y
Q0VBK2	Krt80	PE	Keratin, type II cytoskeletal 80 OS=Mus musculus GN=Krt80 PE=1 SV=1	7.9646	4	5	2	452	50.629	6.27	Y	Y	Y
Q9CYI0	1	SV	Protein Njmu-R1 OS=Mus musculus PE=1 SV=2	5.08906	1	1	1	393	44.394	5.05	Y		Y
Q9JM93	Arl6ip4	PE	ADP-ribosylation factor-like protein 6-interacting protein 4 OS=Mus musculus GN=Arl6ip4 PE=1 SV=1	6.9869	1	1	1	229	25.51	11.19	Y		Y
O08915	Aip	PE	AH receptor-interacting protein OS=Mus musculus GN=Aip PE=1 SV=1	4.54545	1	1	1	330	37.581	6.4	Y		Y
G3X8U3	2210016F16Rik	PE	MCG6895 OS=Mus musculus GN=2210016F16Rik PE=1 SV=1	6.80473	2	2	2	338	38.591	5.64	Y		Y
Q9D7Y9	Slx4ip	PE	Protein SLX4IP OS=Mus musculus GN=Slx4ip PE=2 SV=1	3.63196	1	1	1	413	45.708	9.41	Y		Y
O54988	Slk	PE	STE20-like serine/threonine-protein kinase OS=Mus musculus GN=Slk PE=1 SV=2	1.21655	1	1	1	1233	141.37	5.14	Y		Y
P32233	Drg1	PE	Developmentally-regulated GTP-binding protein 1 OS=Mus musculus GN=Drg1 PE=1 SV=1	4.35967	1	1	1	367	40.487	8.9	Y		Y
Q91V64	Isoc1	PE	Isochorismatase domain-containing protein 1 OS=Mus musculus GN=Isoc1 PE=1 SV=1	6.39731	1	1	1	297	32.012	7.39	Y		Y
Q99LD4	Gps1	PE	COP9 signalosome complex subunit 1 OS=Mus musculus GN=Gps1 PE=1 SV=1	3.60934	2	2	2	471	53.408	6.84	Y		Y
B1ASA5	Zfp362	PE	Zinc finger protein 362 OS=Mus musculus GN=Zfp362 PE=1 SV=1	3.11005	1	1	1	418	45.643	9.64	Y		Y
Q9ERD8	Parvg	PE	Gamma-parvin OS=Mus musculus GN=Parvg PE=1 SV=2	3.62538	1	1	1	331	37.58	5.66	Y		Y
Q3THK3	Gtf2f1	PE	General transcription factor IIF subunit 1 OS=Mus musculus GN=Gtf2f1 PE=1 SV=2	6.49606	2	2	2	508	57.206	7.01	Y		Y
Q9CQR2	Rps21	PE	40S ribosomal protein S21 OS=Mus musculus GN=Rps21 PE=1 SV=1	16.8675	1	1	1	83	9.136	8.51	Y		Y
P42125	Eci1	PE	Enoyl-CoA delta isomerase 1, mitochondrial OS=Mus musculus GN=Eci1 PE=1 SV=2	11.7647	4	4	4	289	32.23	8.98	Y		Y
Q6NVE9	Pptc7	PE	Protein phosphatase PTC7 homolog OS=Mus musculus GN=Pptc7 PE=1 SV=1	3.87097	1	1	1	310	33.027	5.27	Y		Y
Q6Y7W8	Gigyf2	PE	GRB10-interacting GYF protein 2 OS=Mus musculus GN=Gigyf2 PE=1 SV=2	1.54919	2	2	1	1291	149.102	5.57	Y		Y
A0A0G2JEA5	Gm43738	PE	Uncharacterized protein OS=Mus musculus GN=Gm43738 PE=4 SV=1	1.74014	1	1	1	862	95.163	7.21	Y		Y
P42567	Eps15	PE	Epidermal growth factor receptor substrate 15 OS=Mus musculus GN=Eps15 PE=1 SV=1	1.44928	1	1	1	897	98.41	4.6	Y		Y
Q91X20	Ash2l	PE	Set1/Ash2 histone methyltransferase complex subunit ASH2 OS=Mus musculus GN=Ash2l PE=1 SV=1	1.28411	1	1	1	623	68.207	5.69	Y		Y
Q9CZ62	Cep97	PE	Centrosomal protein of 97 kDa OS=Mus musculus GN=Cep97 PE=1 SV=1	1.28505	1	1	1	856	94.582	5	Y		Y
Q61464	Znf638	PE	Zinc finger protein 638 OS=Mus musculus GN=Znf638 PE=1 SV=2	0.663265	1	1	1	1960	217.999	6.89	Y		Y
Q91VN4	Chchd6	PE	MICOS complex subunit Mic25 OS=Mus musculus GN=Chchd6 PE=1 SV=2	7.32601	2	2	2	273	29.833	8.41	Y		Y
Q9CWL8	Ctnnbl1	PE	Beta-catenin-like protein 1 OS=Mus musculus GN=Ctnnbl1 PE=1 SV=1	1.7762	1	1	1	563	64.939	5.07	Y		Y
Q9CPV4	Glod4	PE	Glyoxalase domain-containing protein 4 OS=Mus musculus GN=Glod4 PE=1 SV=1	3.3557	1	1	1	298	33.296	5.47	Y		Y
Q8BHB3	Lax1	PE	Lymphocyte transmembrane adapter 1 OS=Mus musculus GN=Lax1 PE=2 SV=2	3.9312	1	1	1	407	44.811	5.01	Y		Y
Q8C142	Ldlrap1	PE	Low density lipoprotein receptor adapter protein 1 OS=Mus musculus GN=Ldlrap1 PE=1 SV=3	3.8961	1	1	1	308	33.954	6.58	Y		Y
Q9D0R2	Tars	PE	Threonine--tRNA ligase, cytoplasmic OS=Mus musculus GN=Tars PE=1 SV=2	1.24654	1	1	1	722	83.303	7.36	Y		Y
Q9R0N0	Galk1	PE	Galactokinase OS=Mus musculus GN=Galk1 PE=1 SV=2	2.55102	1	1	1	392	42.268	5.26	Y		Y
Q9CYA6	Zcchc8	PE	Zinc finger CCHC domain-containing protein 8 OS=Mus musculus GN=Zcchc8 PE=1 SV=3	1.55148	1	1	1	709	77.977	4.73	Y		Y
O88441	Mtx2	PE	Metaxin-2 OS=Mus musculus GN=Mtx2 PE=1 SV=1	4.18251	1	1	1	263	29.739	5.63	Y		Y
Q62523	Zyx	PE	Zyxin OS=Mus musculus GN=Zyx PE=1 SV=2	2.65957	1	1	1	564	60.507	6.4	Y		Y
Q9JL16	Isg20	PE	Interferon-stimulated gene 20 kDa protein OS=Mus musculus GN=Isg20 PE=1 SV=1	4.33333	1	1	1	300	32.482	8.15	Y		Y
Q9D8V0	Hm13	PE	Minor histocompatibility antigen H13 OS=Mus musculus GN=Hm13 PE=1 SV=1	3.1746	1	1	1	378	41.721	6.04	Y		Y
Q8BMP6	Acbd3	PE	Golgi resident protein GCP60 OS=Mus musculus GN=Acbd3 PE=1 SV=3	1.52381	1	1	1	525	60.144	5.11	Y		Y
Q921T2	Tor1aip1	PE	Torsin-1A-interacting protein 1 OS=Mus musculus GN=Tor1aip1 PE=1 SV=3	1.17647	1	1	1	595	66.74	7.05	Y		Y
O54918	Bcl2l11	PE	Bcl-2-like protein 11 OS=Mus musculus GN=Bcl2l11 PE=1 SV=1	7.14286	1	1	1	196	22.053	6.54	Y		Y
O88545	Cops6	PE	COP9 signalosome complex subunit 6 OS=Mus musculus GN=Cops6 PE=1 SV=1	2.46914	1	1	1	324	35.857	5.73	Y		Y
P16872	Il7r	PE	Interleukin-7 receptor subunit alpha OS=Mus musculus GN=Il7r PE=1 SV=2	1.74292	1	1	1	459	51.572	7.99	Y		Y
P34884	Mif	PE	Macrophage migration inhibitory factor OS=Mus musculus GN=Mif PE=1 SV=2	6.08696	1	1	1	115	12.496	7.34	Y		Y
Q64727	Vcl	PE	Vinculin OS=Mus musculus GN=Vcl PE=1 SV=4	1.87617	2	2	2	1066	116.644	6	Y		Y
Q8VGD6	Olfr56	PE	Olfactory receptor 56 OS=Mus musculus GN=Olfr56 PE=2 SV=1	2.22222	1	1	1	315	34.97	8.75	Y		Y
A0A0G2JFZ3	Igkv19-93	PE	Immunoglobulin kappa chain variable 19-93 (Fragment) OS=Mus musculus GN=Igkv19-93 PE=1 SV=4	6.95652	1	1	1	115	12.783	8.29	Y		Y
ENSEMBL:ENSBTAP00000001528			(Bos taurus) similar to intersectin long isoform 4	0.490998	1	1	1	1222	137.901	7.43	Y	Y	Y
Q9QYR9	Acot2	PE	Acyl-coenzyme A thioesterase 2, mitochondrial OS=Mus musculus GN=Acot2 PE=1 SV=2	1.766	1	1	1	453	49.626	7.36	Y		Y
Q8CB44	Gramd4	PE	GRAM domain-containing protein 4 OS=Mus musculus GN=Gramd4 PE=1 SV=1	1.10585	1	1	1	633	72.218	9.07	Y		Y
D3Z0K6	Rsbn1l	PE	MCG120108, isoform CRA_a OS=Mus musculus GN=Rsbn1l PE=1 SV=1	1.46163	1	1	1	821	91.689	8.95	Y		Y
Q8BJ64	Chdh	PE	Choline dehydrogenase, mitochondrial OS=Mus musculus GN=Chdh PE=1 SV=1	2.68456	1	1	1	596	66.372	8.51	Y		Y
Q68FH4	Galk2	PE	N-acetylgalactosamine kinase OS=Mus musculus GN=Galk2 PE=1 SV=1	1.74672	1	1	1	458	50.47	6.9	Y		Y
Q91WM1	Strbp	PE	Spermatid perinuclear RNA-binding protein OS=Mus musculus GN=Strbp PE=1 SV=1	1.4881	1	1	1	672	73.658	8.72	Y		Y
O88544	Cops4	PE	COP9 signalosome complex subunit 4 OS=Mus musculus GN=Cops4 PE=1 SV=1	4.18719	1	1	1	406	46.256	5.83	Y		Y
P03930	Mtatp8	PE	ATP synthase protein 8 OS=Mus musculus GN=Mtatp8 PE=1 SV=1	14.9254	1	1	1	67	7.761	9.88	Y		Y
Q8C0Y0	Ppp4r4	PE	Serine/threonine-protein phosphatase 4 regulatory subunit 4 OS=Mus musculus GN=Ppp4r4 PE=1 SV=2	0.685714	1	1	1	875	99.417	7.71	Y		Y
P08003	Pdia4	PE	Protein disulfide-isomerase A4 OS=Mus musculus GN=Pdia4 PE=1 SV=3	1.09718	1	1	1	638	71.938	5.31	Y		Y
Q8BKF1	Polrmt	PE	DNA-directed RNA polymerase, mitochondrial OS=Mus musculus GN=Polrmt PE=1 SV=1	0.8285	1	1	1	1207	136.618	9.09	Y		Y
Q80UW8	Polr2e	PE	DNA-directed RNA polymerases I, II, and III subunit RPABC1 OS=Mus musculus GN=Polr2e PE=1 SV=1	4.28571	1	1	1	210	24.555	5.95	Y		Y
Q9CWW7	Cxxc1	PE	CXXC-type zinc finger protein 1 OS=Mus musculus GN=Cxxc1 PE=2 SV=1	2.12121	1	1	1	660	76.118	8.27	Y		Y
Q9Z1T6	Pikfyve	PE	1-phosphatidylinositol 3-phosphate 5-kinase OS=Mus musculus GN=Pikfyve PE=1 SV=3	0.66762	1	1	1	2097	236.727	6.68	Y		Y
Q3UBX0	Tmem109	PE	Transmembrane protein 109 OS=Mus musculus GN=Tmem109 PE=1 SV=2	3.7037	1	1	1	243	26.289	9.89	Y		Y
Q91ZJ0	Mus81	PE	Crossover junction endonuclease MUS81 OS=Mus musculus GN=Mus81 PE=1 SV=2	1.45191	1	1	1	551	61.493	9.41	Y		Y
Q8R0A0	Gtf2f2	PE	General transcription factor IIF subunit 2 OS=Mus musculus GN=Gtf2f2 PE=1 SV=1	3.61446	1	1	1	249	28.364	9.22	Y		Y
Q6B966	Nlrp14	PE	NACHT, LRR and PYD domains-containing protein 14 OS=Mus musculus GN=Nlrp14 PE=2 SV=2	1.20846	1	1	1	993	113.313	6.49	Y		Y
B9EKI3	Tmf1	PE	TATA element modulatory factor OS=Mus musculus GN=Tmf1 PE=1 SV=2	0.91659	1	1	1	1091	121.729	4.87	Y		Y
Q3UH45	Tecpr2	PE	Putative uncharacterized protein OS=Mus musculus GN=Tecpr2 PE=1 SV=1	0.702741	1	1	1	1423	154.841	5.38	Y		Y
Q60775	Elf1	PE	ETS-related transcription factor Elf-1 OS=Mus musculus GN=Elf1 PE=1 SV=1	2.45098	1	1	1	612	66.18	4.97	Y		Y
Q66JY2	Ino80d	PE	INO80 complex subunit D OS=Mus musculus GN=Ino80d PE=2 SV=3	0.801833	1	1	1	873	97.436	8.18	Y		Y
O08663	Metap2	PE	Methionine aminopeptidase 2 OS=Mus musculus GN=Metap2 PE=1 SV=1	2.09205	1	1	1	478	52.888	5.82	Y		Y
Q9DAT2	Mrgbp	PE	MRG/MORF4L-binding protein OS=Mus musculus GN=Mrgbp PE=1 SV=2	3.43137	1	1	1	204	22.422	5.83	Y		Y
Q6P7W0	Senp6	PE	Sentrin-specific protease 6 OS=Mus musculus GN=Senp6 PE=1 SV=3	1.23675	1	1	1	1132	126.933	6.74	Y		Y
Q9CR68	Uqcrfs1	PE	Cytochrome b-c1 complex subunit Rieske, mitochondrial OS=Mus musculus GN=Uqcrfs1 PE=1 SV=1	10.9489	2	2	2	274	29.349	8.7	Y		Y
Q9WV07	Aloxe3	PE	Hydroperoxide isomerase ALOXE3 OS=Mus musculus GN=Aloxe3 PE=1 SV=2	2.391	2	2	2	711	80.42	6.8	Y		Y
Q6RUT8	Ccdc154	PE	Coiled-coil domain-containing protein 154 OS=Mus musculus GN=Ccdc154 PE=2 SV=2	1.67428	1	1	1	657	74.565	5.35	Y		Y
Q62441	Tle4	PE	Transducin-like enhancer protein 4 OS=Mus musculus GN=Tle4 PE=1 SV=4	0.905563	1	1	1	773	83.735	7.5	Y		Y
P62204	Calm1	PE	Calmodulin OS=Mus musculus GN=Calm1 PE=1 SV=2	8.72483	1	1	1	149	16.827	4.22	Y		Y
Q5U405	Tmprss13	PE	Transmembrane protease serine 13 OS=Mus musculus GN=Tmprss13 PE=2 SV=2	1.4733	1	3	1	543	59.768	9.01	Y		Y
P97465	Dok1	PE	Docking protein 1 OS=Mus musculus GN=Dok1 PE=1 SV=2	1.86722	1	1	1	482	52.419	6.57	Y		Y
Q9DBY4	Tril	PE	TLR4 interactor with leucine rich repeats OS=Mus musculus GN=Tril PE=2 SV=1	1.73053	1	1	1	809	88.754	9.6	Y		Y
Q6A4J8	Usp7	PE	Ubiquitin carboxyl-terminal hydrolase 7 OS=Mus musculus GN=Usp7 PE=1 SV=1	2.53853	2	2	2	1103	128.393	5.5	Y		Y
Q6P3D0	Nudt16	PE	U8 snoRNA-decapping enzyme OS=Mus musculus GN=Nudt16 PE=1 SV=1	5.64103	1	1	1	195	21.811	7.12	Y		Y
Q8K352	Sash3	PE	SAM and SH3 domain-containing protein 3 OS=Mus musculus GN=Sash3 PE=1 SV=2	2.10526	1	1	1	380	41.583	5.22	Y		Y
Q99LY9	Ndufs5	PE	NADH dehydrogenase [ubiquinone] iron-sulfur protein 5 OS=Mus musculus GN=Ndufs5 PE=1 SV=3	7.54717	1	1	1	106	12.639	8.92	Y		Y
O70579	Slc25a17	PE	Peroxisomal membrane protein PMP34 OS=Mus musculus GN=Slc25a17 PE=1 SV=1	2.9316	1	1	1	307	34.391	10.11	Y		Y
Q01339	Apoh	PE	Beta-2-glycoprotein 1 OS=Mus musculus GN=Apoh PE=1 SV=1	2.6087	1	1	1	345	38.593	8.22	Y		Y
Q3USH5	Sfswap	PE	Splicing factor, suppressor of white-apricot homolog OS=Mus musculus GN=Sfswap PE=1 SV=2	0.634921	1	1	1	945	104.126	8.05	Y		Y
Q8C0D5	Efl1	PE	Elongation factor-like GTPase 1 OS=Mus musculus GN=Efl1 PE=1 SV=1	0.621118	1	1	1	1127	125.697	6.16	Y		Y
Q8K3Z9	Pom121	PE	Nuclear envelope pore membrane protein POM 121 OS=Mus musculus GN=Pom121 PE=1 SV=2	0.916667	1	1	1	1200	120.948	10.2	Y		Y
Q9ESX2	Sp6	PE	Transcription factor Sp6 OS=Mus musculus GN=Sp6 PE=2 SV=2	1.59574	1	1	1	376	39.99	7.25	Y		Y
Q8BG15	Ctdspl2	PE	CTD small phosphatase-like protein 2 OS=Mus musculus GN=Ctdspl2 PE=1 SV=1	2.7957	1	1	1	465	52.78	6.25	Y		Y
Q5F2E7	Nufip2	PE	Nuclear fragile X mental retardation-interacting protein 2 OS=Mus musculus GN=Nufip2 PE=1 SV=1	1.15607	1	1	1	692	75.611	8.7	Y		Y
P33215	Nedd1	PE	Protein NEDD1 OS=Mus musculus GN=Nedd1 PE=1 SV=2	3.18182	1	1	1	660	71.248	7.84	Y		Y
P18654	Rps6ka3	PE	Ribosomal protein S6 kinase alpha-3 OS=Mus musculus GN=Rps6ka3 PE=1 SV=2	1.62162	1	1	1	740	83.641	6.89	Y		Y
O35904	Pik3cd	PE	Phosphatidylinositol 4,5-bisphosphate 3-kinase catalytic subunit delta isoform OS=Mus musculus GN=Pik3cd PE=1 SV=2	74.3049	82	1723	82	1043	119.635	7.34				4.803	1.095	3.97	0.984	4.672	3.785	2.567	5.516		25393.6	109031	121956	27808.7	73951.8	100809	24992.1	158888	118637	28805.2
Streptavidin			(S.avidinii)	49.375	9	4100	9	160	16.612	6.55		Y	Y	0.769	1.18	0.749	1.275	0.618	0.811	0.603	1.034		149128	108091	114734	175992	80326.9	111741	190096	137799	92204.6	133246
P26450	Pik3r1	PE	Phosphatidylinositol 3-kinase regulatory subunit alpha OS=Mus musculus GN=Pik3r1 PE=1 SV=2	82.3204	68	1241	59	724	83.465	6.28				5.088	1.063	4.153	0.849	4.758	4.344	2.773	5.918		19517.6	91280	99306.7	20756	58258.9	81053.2	16568.8	124353	92862	21012.7
P53395	Dbt	PE	Lipoamide acyltransferase component of branched-chain alpha-keto acid dehydrogenase complex, mitochondrial OS=Mus musculus GN=Dbt PE=1 SV=2	68.4647	35	1098	35	482	53.213	8.6				0.785	1.034	0.655	1.324	0.733	0.729	0.49	1.094		81334.6	52912.6	63880.8	84077.6	35537.3	53245.7	107651	79367.6	59613.2	72576.1
Q9QXS1	Plec	PE	Plectin OS=Mus musculus GN=Plec PE=1 SV=3	69.9424	366	1140	361	4691	533.861	5.96				0.547	0.908	0.826	0.502	0.33	0.765	0.704	0.649		88858.1	64867.6	48591.7	80695	59627.8	73392.4	44595.7	54998.2	29298.6	84738.9
Q5SWU9	Acaca	PE	Acetyl-CoA carboxylase 1 OS=Mus musculus GN=Acaca PE=1 SV=1	71.0021	150	737	133	2345	265.088	6.39				0.877	1.327	0.845	1.496	0.952	0.726	0.684	1.362		41158.2	26425.2	36115.9	54624.1	24912.7	34774.2	61573.3	49561.4	39199.6	36400
Q91ZA3	Pcca	PE	Propionyl-CoA carboxylase alpha chain, mitochondrial OS=Mus musculus GN=Pcca PE=1 SV=2	72.5138	55	703	54	724	79.871	7.25				0.697	1.129	0.624	1.462	0.617	0.74	0.563	0.959		48668.7	29551.9	33940.7	54929.3	22460.1	30352.8	71164	38275.8	30029.7	39925.8
Q8VDD5	Myh9	PE	Myosin-9 OS=Mus musculus GN=Myh9 PE=1 SV=4	63.3163	142	485	142	1960	226.232	5.66				0.39	0.482	0.336	0.353	0.301	0.568	0.601	0.512		56179.4	25509.2	21911.7	27058.2	26991.9	18882.8	19827.7	22992.3	16908.4	44895.4
Q99MN9	Pccb	PE	Propionyl-CoA carboxylase beta chain, mitochondrial OS=Mus musculus GN=Pccb PE=1 SV=2	77.0795	39	495	39	541	58.372	7.66				0.687	1.052	0.624	1.383	0.606	0.701	0.566	0.999		31013.8	17350.1	21312.3	32631.8	14008.4	19363.8	42906	24747.6	18786.2	24764.6
Q99MR8	Mccc1	PE	Methylcrotonoyl-CoA carboxylase subunit alpha, mitochondrial OS=Mus musculus GN=Mccc1 PE=1 SV=2	71.2692	47	363	47	717	79.293	7.83				0.725	1.004	0.643	1.262	0.637	0.785	0.604	1.03		23873.9	15088.6	17306.6	23978.2	11607.1	15345.8	30125.7	19788.3	15209.9	19218.4
P11499	Hsp90ab1	PE	Heat shock protein HSP 90-beta OS=Mus musculus GN=Hsp90ab1 PE=1 SV=3	49.4475	31	104	19	724	83.229	5.03				3.068	1.344	2.457	0.999	2.94	2.38	1.495	2.482		3237.2	9194.5	9930.8	4350.9	5776.6	7952.3	3234.9	9587	9517.5	3863
Q3ULD5	Mccc2	PE	Methylcrotonoyl-CoA carboxylase beta chain, mitochondrial OS=Mus musculus GN=Mccc2 PE=1 SV=1	74.2451	34	263	34	563	61.34	8				0.719	0.992	0.612	1.34	0.607	0.775	0.573	1.064		13478.4	8073.7	9690.5	13370.2	5970	8245	18061	11084.4	8179.2	10420.4
P60710	Actb	PE	Actin, cytoplasmic 1 OS=Mus musculus GN=Actb PE=1 SV=1	58.9333	22	318	10	375	41.71	5.48				0.94	0.799	0.886	0.673	1.084	0.899	0.733	0.603		9441.5	8695.5	8876.4	7539.7	7082.4	8363.6	6356.6	5829.5	10234.7	9667.5
Q6ZQ38	Cand1	PE	Cullin-associated NEDD8-dissociated protein 1 OS=Mus musculus GN=Cand1 PE=1 SV=2	44.7967	51	138	48	1230	136.245	5.78				0.816	1.26	1.222	0.556	0.5	0.999	0.684	0.586		10392.6	9690	8476.4	13097.2	6636.2	12703.6	5775.6	5679.9	5194.2	9695.1
P20152	Vim	PE	Vimentin OS=Mus musculus GN=Vim PE=1 SV=3	75.1073	46	163	43	466	53.655	5.12				0.683	0.861	0.71	0.743	0.39	0.895	0.648	0.65		12126.1	13863.5	8280.6	10445.1	10025.6	8611.5	9005.9	10063.8	4734.9	15482.6
A8DUK4	Hbbt1	PE	Beta-globin OS=Mus musculus GN=Hbbt1 PE=1 SV=1	95.2381	15	132	13	147	15.738	7.69		Y	Y	1.211	0.53	0.511	0.539	1.497	0.751	0.161	0.249		6809.8	10315.9	8248.8	3611.5	2207.5	3477.5	3672.2	3416.5	10194.3	13733.5
P01942	Hba	PE	Hemoglobin subunit alpha OS=Mus musculus GN=Hba PE=1 SV=2	50.7042	8	85	6	142	15.076	8.22		Y	Y	1.22	0.462	0.855	0.466	1.5	0.714	0.173	0.205		5984.3	8803.3	7300.4	2767.5	2136.5	5119.5	2788.2	2525.6	8976.6	12323.2
E9Q557	Dsp	PE	Desmoplakin OS=Mus musculus GN=Dsp PE=1 SV=1	17.4818	54	79	54	2883	332.706	6.8				1.136	0.593	0.755	0.753	0.444	1.609	0.7	0.859		6391.6	8635.3	7259.8	3792.3	3760.1	4826.1	4812.5	4610	2839.7	5368.1
Q05920	Pc	PE	Pyruvate carboxylase, mitochondrial OS=Mus musculus GN=Pc PE=1 SV=1	56.5365	56	153	56	1178	129.602	6.71				0.654	1.208	0.66	1.191	0.622	0.725	0.583	1.009		10870.1	6239.5	7113.2	13125.7	5015.6	7176.4	12949	8678.2	6756.9	8603
O08908	Pik3r2	PE	Phosphatidylinositol 3-kinase regulatory subunit beta OS=Mus musculus GN=Pik3r2 PE=1 SV=2	54.7091	40	232	34	722	81.216	6.07				4.177	0.98	3.677	0.951	4.03	3.317	2.414	4.758		1646.9	6192	6878.4	1614.1	4505.8	6055.6	1566.6	8881.3	6636	1866.6
P63017	Hspa8	PE	Heat shock cognate 71 kDa protein OS=Mus musculus GN=Hspa8 PE=1 SV=1	64.0867	38	104	31	646	70.827	5.52				1.544	1.087	1.606	1.062	1.775	1.17	1.047	1.252		4380.3	5930.7	6762.6	4761.7	5304.3	7033.7	4651.6	6344.2	7775.2	5068
P43277	Hist1h1d	PE	Histone H1.3 OS=Mus musculus GN=Hist1h1d PE=1 SV=2	42.9864	14	75	1	221	22.086	11.03				1.613	1.129	1.576	1.769	0.922	0.527	2.607	0.792		3892.7	2860.2	6280.2	4396	14146.1	6133.6	6885.9	4298.5	3588	5426.2
Q60634	Flot2	PE	Flotillin-2 OS=Mus musculus GN=Flot2 PE=1 SV=2	73.1308	33	111	33	428	47.009	5.2				0.58	1.082	0.656	0.911	0.492	0.717	0.458	0.763		10494.2	6391	6083.2	11354.1	4083.4	6884.5	9558.8	6801.2	5163.5	8909.5
P26041	Msn	PE	Moesin OS=Mus musculus GN=Msn PE=1 SV=3	64.1248	47	86	34	577	67.725	6.6				1.404	0.963	1.406	0.851	2.606	0.927	0.701	0.494		4095.8	5951.1	5752	3944	4498.1	5760.6	3486.1	3170.5	10675.6	6419.3
P14733	Lmnb1	PE	Lamin-B1 OS=Mus musculus GN=Lmnb1 PE=1 SV=3	68.8776	48	93	42	588	66.745	5.16				0.964	0.98	0.922	1.515	1.723	0.745	1.11	1.955		5361.7	3632.7	5170.9	5256.2	5412.8	4944.8	8120.9	9537.5	9235.9	4878.1
Q8BTM8	Flna	PE	Filamin-A OS=Mus musculus GN=Flna PE=1 SV=5	29.0518	65	94	65	2647	281.046	6.04				0.957	1.025	1.035	1.209	1.356	0.799	0.674	0.834		5376.1	4751.9	5143.1	5512.2	4012.3	5562.3	6500.1	4963.4	7292.2	5950.8
P10126	Eef1a1	PE	Elongation factor 1-alpha 1 OS=Mus musculus GN=Eef1a1 PE=1 SV=3	54.1126	21	79	21	462	50.082	9.01				1.394	1.129	1.475	1.082	2.352	1.001	1.523	0.66		3559.7	5093.7	4963.6	4018	7755.6	5249.7	3852.9	3361.1	8372.9	5090.8
O08917	Flot1	PE	Flotillin-1 OS=Mus musculus GN=Flot1 PE=1 SV=1	77.3364	31	129	31	428	47.484	7.15				0.56	1.071	0.652	0.879	0.493	0.705	0.477	0.731		8599.8	5264.5	4816.5	9207.3	3561	5611.3	7558.2	5464.5	4237.6	7471.8
Q6P5F9	Xpo1	PE	Exportin-1 OS=Mus musculus GN=Xpo1 PE=1 SV=1	36.5079	35	80	35	1071	123.013	6.07				0.832	1.304	1.28	0.61	0.582	0.934	0.725	0.554		5564.4	5219.7	4631.9	7255.8	4050.7	7124.2	3392.5	3095.9	3236.6	5587.1
Q8CAQ8	Immt	PE	MICOS complex subunit Mic60 OS=Mus musculus GN=Immt PE=1 SV=1	61.0304	50	83	50	757	83.848	6.61				0.563	0.834	0.725	0.555	0.418	0.638	0.55	0.514		8193.5	5331.6	4611.6	6834.4	4592.4	5942.6	4543.6	4291.2	3426.8	8353.4
Q68FD5	Cltc	PE	Clathrin heavy chain 1 OS=Mus musculus GN=Cltc PE=1 SV=3	32.0597	45	77	45	1675	191.435	5.69				0.828	0.982	1.005	0.658	0.663	0.844	0.717	0.618		5549.4	4166.3	4597.3	5452.2	3537.1	5574.6	3650.4	3050.2	3676.6	4934.2
P62983	Rps27a	PE	Ubiquitin-40S ribosomal protein S27a OS=Mus musculus GN=Rps27a PE=1 SV=2	64.7436	10	54	4	156	17.939	9.64				1.419	0.998	1.635	1.585	1.647	0.827	1.311	1.176		3084.9	2786.3	4377.9	3078.6	4416.3	5043.8	4890.7	3960.8	5081.1	3368.5
Q02257	Jup	PE	Junction plakoglobin OS=Mus musculus GN=Jup PE=1 SV=3	37.8523	24	46	21	745	81.749	6.14				1.488	0.619	0.886	0.926	0.426	1.226	0.472	0.634		2918.7	4372.2	4342.2	1805.9	1681.7	2585.5	2703	2262.7	1244.4	3566.7
O89053	Coro1a	PE	Coronin-1A OS=Mus musculus GN=Coro1a PE=1 SV=5	41.4317	22	59	21	461	50.957	6.48				1.172	0.861	1.09	0.833	1.519	0.843	0.61	0.638		3634.2	4018.1	4260	3129.6	2908	3961	3027.4	3043.7	5520.8	4767.5
E9PVA8	Gcn1	PE	eIF-2-alpha kinase activator GCN1 OS=Mus musculus GN=Gcn1 PE=1 SV=1	27.1434	67	94	67	2671	292.834	7.36				0.838	1.374	1.293	0.653	0.564	0.985	0.788	0.626		4935.4	4697.3	4134.2	6782.4	3760.8	6381.4	3221.3	2986.1	2781.5	4771
Q8BMF4	Dlat	PE	Dihydrolipoyllysine-residue acetyltransferase component of pyruvate dehydrogenase complex, mitochondrial OS=Mus musculus GN=Dlat PE=1 SV=2	43.6137	22	103	22	642	67.899	8.57				0.399	1.106	0.401	1.133	0.292	0.443	0.402	0.722		10258.8	2572.5	4094.9	11345	2337	4117.9	11623.4	4196.5	2999	5811.4
Q8C3J5	Dock2	PE	Dedicator of cytokinesis protein 2 OS=Mus musculus GN=Dock2 PE=1 SV=3	28.2276	53	73	53	1828	211.568	6.99				0.893	1.129	1.23	0.727	0.949	0.858	0.768	0.676		4557	4162.9	4069.9	5146.8	3728.1	5603.4	3312.7	3278.3	4322.5	4851.2
P26039	Tln1	PE	Talin-1 OS=Mus musculus GN=Tln1 PE=1 SV=2	25.9347	59	73	59	2541	269.653	6.18				1.056	1.063	1.015	1.085	1.573	0.803	0.63	0.794		3780.4	3401	3990.3	4017.2	2669.1	3835.5	4102.7	3362.5	5946.5	4235.3
P07901	Hsp90aa1	PE	Heat shock protein HSP 90-alpha OS=Mus musculus GN=Hsp90aa1 PE=1 SV=4	39.5634	29	86	19	733	84.735	5.01				2.612	1.012	2.06	0.897	2.602	1.935	1.266	2.294		1521.9	3503.4	3974.7	1539.4	2292.1	3135.7	1365.6	4152.9	3959.2	1810.4
Q8BFY9	Tnpo1	PE	Transportin-1 OS=Mus musculus GN=Tnpo1 PE=1 SV=2	23.0512	21	68	13	898	102.291	4.98				0.702	1.249	1.056	0.551	0.396	0.891	0.637	0.503		5096.4	4030.3	3575.7	6366.6	2878	5379.3	2809.3	2273.6	2017.1	4521.3
P51660	Hsd17b4	PE	Peroxisomal multifunctional enzyme type 2 OS=Mus musculus GN=Hsd17b4 PE=1 SV=3	47.7551	31	86	31	735	79.432	8.57				0.737	1.26	1.146	0.567	0.432	0.971	0.76	0.533		4803.3	4487.2	3538.9	6051.5	3511.9	5505.4	2724.7	2462.4	2076.9	4623.3
Q8VEK3	Hnrnpu	PE	Heterogeneous nuclear ribonucleoprotein U OS=Mus musculus GN=Hnrnpu PE=1 SV=1	34	30	74	30	800	87.863	6.24				1.194	1.066	1.303	1.642	1.442	0.595	2.771	0.83		2884.7	2322.4	3445.6	3075.2	10814.9	3757.7	4737.7	3239	4158.4	3902.6
P17182	Eno1	PE	Alpha-enolase OS=Mus musculus GN=Eno1 PE=1 SV=3	53.6866	20	49	16	434	47.111	6.8				1.56	1.164	2.02	0.815	3.172	1.086	0.789	0.573		2024.9	3457.9	3159.5	2357.5	2510.3	4090.7	1650.2	1824.3	6423.9	3183.5
P51881	Slc25a5	PE	ADP/ATP translocase 2 OS=Mus musculus GN=Slc25a5 PE=1 SV=3	62.4161	19	106	9	298	32.91	9.73				0.762	1.072	1.004	0.787	0.805	0.968	3.324	0.735		4012.1	3715.9	3056	4302.4	12761.4	4029.2	3157.5	2820.6	3229.2	3838.9
Q61233	Lcp1	PE	Plastin-2 OS=Mus musculus GN=Lcp1 PE=1 SV=4	54.386	30	54	30	627	70.105	5.33				1.344	1.122	1.487	0.939	2.701	0.879	0.539	0.584		2263.1	3164.5	3041.7	2538.2	1941.4	3364.4	2125.8	2101.1	6112.6	3598.7
P09405	Ncl	PE	Nucleolin OS=Mus musculus GN=Ncl PE=1 SV=2	30.5516	24	38	24	707	76.677	4.75				1.571	1.482	1.633	0.91	2.483	1.102	1.268	1.006		1900.2	2470.4	2985.8	2816.5	2842	3102.2	1728.5	2253.7	4718.6	2241.1
P16546	Sptan1	PE	Spectrin alpha chain, non-erythrocytic 1 OS=Mus musculus GN=Sptan1 PE=1 SV=4	21.3188	49	56	49	2472	284.422	5.33				0.853	0.917	0.793	0.776	1.001	0.67	0.613	0.654		3451.9	2608.1	2943.9	3165.4	2384.6	2737	2679.5	2544.9	3456.1	3891.4
P14824	Anxa6	PE	Annexin A6 OS=Mus musculus GN=Anxa6 PE=1 SV=3	56.315	34	50	33	673	75.837	5.5				1.391	1.064	1.468	0.871	2.856	0.962	0.616	0.644		2114.7	3019.6	2941.9	2251	1935.4	3103.9	1841.1	2021.5	6039.4	3139.8
P10854	Hist1h2bm	PE	Histone H2B type 1-M OS=Mus musculus GN=Hist1h2bm PE=1 SV=2	58.7302	10	118	4	126	13.928	10.32				0.668	1.079	1.706	1.998	0.822	0.456	2.806	0.993		4380.3	2586.3	2925.3	4724.6	15896.6	7472.9	8753.1	5627.9	3601.2	5666
O08784	Tcof1	PE	Treacle protein OS=Mus musculus GN=Tcof1 PE=1 SV=1	26.8182	32	57	32	1320	134.921	9.35				0.8	0.996	0.704	0.934	0.837	0.853	0.98	1.195		3646.7	2595.2	2917	3630.9	2982.7	2566	3406.8	3636.3	3053.1	3043.8
Q8R550	Sh3kbp1	PE	SH3 domain-containing kinase-binding protein 1 OS=Mus musculus GN=Sh3kbp1 PE=1 SV=1	40.4795	23	45	23	709	78.122	7.55				2.031	1.011	1.838	1.185	2.141	1.481	1.106	2.01		1432.9	2340.1	2910.7	1448.5	1747.4	2634	1698	3174.8	3067.8	1579.6
S4R1W1	Gm3839	PE	Glyceraldehyde-3-phosphate dehydrogenase OS=Mus musculus GN=Gm3839 PE=1 SV=1	54.3544	17	53	17	333	35.789	8.03				1.202	0.938	1.339	0.85	2.149	1	1.208	0.71		2274.5	2948.3	2734	2133.7	3562	3045	1934.3	2094.3	4888	2948.8
P63038	Hspd1	PE	60 kDa heat shock protein, mitochondrial OS=Mus musculus GN=Hspd1 PE=1 SV=1	54.7993	29	58	29	573	60.917	6.18				0.842	1.481	1.024	1.194	1.087	0.855	0.785	1.104		3202.2	2509.5	2695.8	4743	2304	3278.1	3824.4	3242.1	3482.3	2935.6
P52480	Pkm	PE	Pyruvate kinase PKM OS=Mus musculus GN=Pkm PE=1 SV=4	49.5292	24	43	24	531	57.808	7.47				1.358	0.967	1.474	0.974	2.793	1.017	0.63	0.617		1984.5	2736.5	2694.7	1918.3	1695.1	2924.5	1932	1661.7	5543.1	2691.2
P58252	Eef2	PE	Elongation factor 2 OS=Mus musculus GN=Eef2 PE=1 SV=2	32.1678	26	43	25	858	95.253	6.83				1.366	1	1.363	0.88	2.331	1.094	0.674	0.685		1941.2	2761.5	2651.6	1941.4	1702.7	2645.4	1708.7	1728.5	4525.2	2524.7
Q9D0E1	Hnrnpm	PE	Heterogeneous nuclear ribonucleoprotein M OS=Mus musculus GN=Hnrnpm PE=1 SV=3	41.9753	31	55	31	729	77.597	8.63				1.175	1.018	1.106	1.14	1.224	0.817	2.044	0.922		2188.4	1925.9	2571.4	2228.3	4819.4	2419.9	2494.9	2174.7	2678.2	2357.8
Q9ERK4	Cse1l	PE	Exportin-2 OS=Mus musculus GN=Cse1l PE=1 SV=1	35.1184	31	50	31	971	110.384	5.77				0.8	1.368	1.293	0.676	0.567	0.957	0.73	0.596		3205.9	2953.5	2564.3	4385.6	2254	4145.8	2168.1	1839.2	1816.2	3085.8
Q8BKC5	Ipo5	PE	Importin-5 OS=Mus musculus GN=Ipo5 PE=1 SV=3	39.289	34	57	34	1097	123.511	4.93				0.745	1.228	1.113	0.578	0.49	0.93	0.673	0.551		3423.9	2928.9	2551.4	4206.2	2121.7	3810.6	1978	1735.4	1679.1	3150.4
P97351	Rps3a	PE	40S ribosomal protein S3a OS=Mus musculus GN=Rps3a PE=1 SV=3	66.6667	20	66	20	264	29.866	9.73				0.989	1.021	1.07	1.392	1.185	0.866	3.967	1.112		2569.8	2123.3	2541.1	2623.5	9721.5	2748.9	3577	2725.2	3044.8	2450.8
Q03265	Atp5a1	PE	ATP synthase subunit alpha, mitochondrial OS=Mus musculus GN=Atp5a1 PE=1 SV=1	47.1971	26	44	26	553	59.716	9.19				1.067	1.003	1.135	0.893	1.804	0.826	0.589	0.641		2367	2501.8	2525.5	2374.8	1782.5	2687	2113	1940.9	4270.2	3028.5
Q7TPR4	Actn1	PE	Alpha-actinin-1 OS=Mus musculus GN=Actn1 PE=1 SV=1	41.704	33	46	21	892	103.004	5.38				1.297	1.018	1.189	1.009	2.242	0.982	0.633	0.541		1875.5	2580.2	2433	1909.6	1663.5	2230.2	1893.1	1423.2	4205.7	2628.8
Q9ES52	Inpp5d	PE	Phosphatidylinositol 3,4,5-trisphosphate 5-phosphatase 1 OS=Mus musculus GN=Inpp5d PE=1 SV=2	22.754	27	34	26	1191	133.458	7.8				1.24	1.157	1.284	1.153	1.431	0.835	0.699	1.089		1949.5	1716.8	2417.5	2256.2	1436.5	2503.5	2247.2	2238	2790.7	2055.9
ENSEMBL:ENSBTAP00000031900			(Bos taurus) 121 kDa protein	23.2143	24	46	24	1064	121.378	6.09		Y	Y	0.777	1.02	0.743	1.177	0.722	0.849	0.669	1.02		3112.1	2317.5	2417.2	3173.9	1825.5	2312.1	3661.9	2786.2	2245.8	2730.6
Q3THE2	Myl12b	PE	Myosin regulatory light chain 12B OS=Mus musculus GN=Myl12b PE=1 SV=2	54.6512	10	27	10	172	19.767	4.84				0.436	0.404	0.301	0.262	0.206	0.616	0.507	0.467		5542.3	2326.5	2415.9	2236.6	1912.2	1666.6	1452.3	1761	1140	3773.8
Q9EPK7	Xpo7	PE	Exportin-7 OS=Mus musculus GN=Xpo7 PE=1 SV=3	34.1306	34	50	34	1087	123.731	6.38				0.815	1.296	1.321	0.556	0.495	0.952	0.749	0.521		2917.1	2830.4	2377	3781.8	2226.3	3854.5	1620.6	1549.4	1442.5	2973.4
P62806	Hist1h4a	PE	Histone H4 OS=Mus musculus GN=Hist1h4a PE=1 SV=2	53.3981	9	122	9	103	11.36	11.36				0.644	1.423	2.062	2.234	0.844	0.532	4.015	1.114		3587.4	2467.6	2309.3	5103.6	18621.3	7398.5	8016	5165.5	3026.6	4638.3
Q3UV17	Krt76	PE	Keratin, type II cytoskeletal 2 oral OS=Mus musculus GN=Krt76 PE=1 SV=1	12.4579	12	59	1	594	62.806	8.43		Y	Y	1.149	0.431	0.615	0.561	0.368	1.031	0.549	0.764		1966.4	1731.4	2259	847.7	922.2	1208.6	1102.7	1283.8	723.4	1679.2
Q61191	Hcfc1	PE	Host cell factor 1 OS=Mus musculus GN=Hcfc1 PE=1 SV=2	12.1271	23	33	23	2045	210.306	7.18				0.958	1.084	0.883	1.288	1.114	0.845	0.811	1.11		2312.2	1831.7	2214.5	2507.3	1758.5	2042.7	2977.9	2406.4	2575.3	2168.1
Q8BN78	Zbtb33	PE	Transcriptional regulator Kaiso OS=Mus musculus GN=Zbtb33 PE=1 SV=1	34.8733	21	41	21	671	74.004	5.06				0.821	1.048	0.621	1.333	0.752	0.781	0.534	1.166		2672.9	1836.8	2194.6	2800.7	1254.8	1661	3563.9	2742	2010.6	2352
Q60710	Samhd1	PE	Deoxynucleoside triphosphate triphosphohydrolase SAMHD1 OS=Mus musculus GN=Samhd1 PE=1 SV=2	40.9888	25	36	25	627	72.604	7.96				1.113	1.178	1.22	1.042	1.795	0.83	0.685	0.865		1934.9	2027.3	2153.3	2279.7	1672.6	2361.3	2016.2	2114.4	3473.1	2443
P17742	Ppia	PE	Peptidyl-prolyl cis-trans isomerase A OS=Mus musculus GN=Ppia PE=1 SV=2	62.1951	12	24	11	164	17.96	7.9				1.704	1.424	2.155	0.81	4.067	1.062	0.612	0.49		1249.1	2558.6	2128.9	1778.3	1473.1	2692.2	1012.1	1179.9	5079.6	2408.6
P47757	Capzb	PE	F-actin-capping protein subunit beta OS=Mus musculus GN=Capzb PE=1 SV=3	54.1516	14	25	14	277	31.326	5.74				1.38	0.868	1.251	0.934	1.42	1.222	0.981	1.234		1490.4	1824.8	2057.3	1293.8	1464.5	1864.6	1392	1842.7	2115.7	1492.9
Q7TPV4	Mybbp1a	PE	Myb-binding protein 1A OS=Mus musculus GN=Mybbp1a PE=1 SV=2	31.8452	36	62	36	1344	151.942	8.95				0.823	1.528	1.541	0.731	0.859	0.979	1.738	0.781		2399.9	2346.4	1975.8	3666.6	4166.8	3697.6	1754.7	1873.1	2062.4	2397.7
P62702	Rps4x	PE	40S ribosomal protein S4, X isoform OS=Mus musculus GN=Rps4x PE=1 SV=2	60.8365	18	76	18	263	29.579	10.15				0.89	0.786	1.01	1.338	1.085	0.907	9.912	1.183		2203.4	1885.2	1960.7	1732.5	20608.8	2225.7	2948.4	2458.7	2391.5	2079.1
D4AFX7	Dnajc13	PE	DnaJ heat shock protein family (Hsp40) member C13 OS=Mus musculus GN=Dnajc13 PE=1 SV=1	18.194	37	41	37	2248	254.904	6.77				0.769	1.055	0.833	1.147	0.831	0.786	0.773	1.103		2540.1	1643.8	1953.2	2678.7	1617.1	2116.4	2913.8	2306.8	2109.8	2091.5
Q62261	Sptbn1	PE	Spectrin beta chain, non-erythrocytic 1 OS=Mus musculus GN=Sptbn1 PE=1 SV=2	16.2082	34	40	33	2363	274.052	5.58				0.746	0.774	0.723	0.719	0.877	0.678	0.655	0.645		2616	1839.4	1952.2	2024.8	1778.5	1892.1	1881.5	1750.8	2293.3	2714.3
Q61656	Ddx5	PE	Probable ATP-dependent RNA helicase DDX5 OS=Mus musculus GN=Ddx5 PE=1 SV=2	48.8599	32	65	23	614	69.247	8.92				0.964	0.966	1.199	1.354	1.35	0.93	6.856	1		2022.5	2116.1	1949.4	1953.6	15606.4	2424.7	2738.6	2276.3	2731.2	2276.3
Q9CRB9	Chchd3	PE	MICOS complex subunit Mic19 OS=Mus musculus GN=Chchd3 PE=1 SV=1	60.793	17	30	17	227	26.318	8.37				0.521	0.74	0.615	0.408	0.306	0.661	0.55	0.422		3707	2275.1	1929.8	2741.4	1892.6	2279.9	1513.7	1454.6	1134.6	3444.1
Q8BFR5	Tufm	PE	Elongation factor Tu, mitochondrial OS=Mus musculus GN=Tufm PE=1 SV=1	50	19	38	19	452	49.477	7.56				0.723	1.229	0.809	1.214	0.848	0.633	0.715	1.049		2652.4	1463.2	1918.9	3258.6	1652	2145.4	3220.7	2425.9	2250.4	2311.9
F6YVP7	Gm10260	PE	Uncharacterized protein OS=Mus musculus GN=Gm10260 PE=3 SV=2	47.3684	11	71	11	152	17.661	10.74				0.843	0.993	0.866	1.271	0.894	0.803	5.566	1.247		2277	1619.3	1918.7	2261.3	11224.1	1972.4	2894.9	2514.5	2035.3	2016.5
Q9Z204	Hnrnpc	PE	Heterogeneous nuclear ribonucleoproteins C1/C2 OS=Mus musculus GN=Hnrnpc PE=1 SV=1	37.3802	12	17	12	313	34.364	5.05				1.531	0.844	1.165	1.228	1.01	0.774	1.189	0.976		1238.6	865.6	1896.3	1045.2	1330.3	1442.5	1520.4	1091.6	1251.2	1118.6
P35700	Prdx1	PE	Peroxiredoxin-1 OS=Mus musculus GN=Prdx1 PE=1 SV=1	46.7337	11	20	9	199	22.162	8.12				1.636	1.276	1.834	1.3	2.765	1.128	0.732	0.703		1157	2012.8	1892.6	1476.9	1305.3	2121.9	1503.8	1253.9	3198.8	1784
Q8BMS1	Hadha	PE	Trifunctional enzyme subunit alpha, mitochondrial OS=Mus musculus GN=Hadha PE=1 SV=1	31.7169	21	38	21	763	82.617	9.14				0.824	1.506	1.066	1.282	1.135	0.789	1.452	1.075		2291.3	1730.2	1887.8	3449.6	3183.8	2442.5	2936.6	2357.2	2600.9	2192.6
P62962	Pfn1	PE	Profilin-1 OS=Mus musculus GN=Pfn1 PE=1 SV=2	72.1429	8	45	8	140	14.948	8.28				1.477	1.266	1.732	0.735	3.222	0.917	0.538	0.473		1253.8	2050.6	1852.3	1587.3	1201.8	2171.6	922	1057.2	4040.1	2235.1
P42932	Cct8	PE	T-complex protein 1 subunit theta OS=Mus musculus GN=Cct8 PE=1 SV=3	37.5912	19	26	19	548	59.518	5.62				1.143	0.958	1.072	1.045	1.416	1.253	0.731	0.972		1603.5	2096	1833.5	1536.9	1223.6	1719.5	1676.3	1626.3	2271.2	1673.3
P60122	Ruvbl1	PE	RuvB-like 1 OS=Mus musculus GN=Ruvbl1 PE=1 SV=1	45.8333	17	30	17	456	50.182	6.42				0.899	1.149	0.843	1.355	0.912	0.864	0.644	1.073		2037.3	1683.3	1830.7	2341.6	1255.1	1716.8	2759.7	2090.3	1858.6	1947.4
P63101	Ywhaz	PE	14-3-3 protein zeta/delta OS=Mus musculus GN=Ywhaz PE=1 SV=1	60.4082	15	31	9	245	27.754	4.79				1.46	0.952	1.482	0.966	2.543	1.048	0.756	0.559		1250.7	1835.9	1826.5	1190.3	1323.2	1853.8	1208	979.2	3180.5	1751.3
P42225	Stat1	PE	Signal transducer and activator of transcription 1 OS=Mus musculus GN=Stat1 PE=1 SV=1	26.9693	21	25	21	749	87.142	5.58				0.909	1.167	0.95	1.025	1.166	0.799	0.618	0.91		2007.6	1704.6	1824	2342.2	1318.4	1908	2057	1943.3	2340.7	2134.5
Q3U9G9	Lbr	PE	Lamin-B receptor OS=Mus musculus GN=Lbr PE=1 SV=2	27.1565	20	39	20	626	71.395	9.36				0.803	1.135	0.933	0.954	1.251	0.937	0.954	1.13		2256.2	2036.4	1811.5	2561.7	2072.8	2105.7	2151.5	2455.6	2822.4	2172.8
Q2TPA8	Hsdl2	PE	Hydroxysteroid dehydrogenase-like protein 2 OS=Mus musculus GN=Hsdl2 PE=1 SV=1	37.1429	19	37	19	490	54.174	6.74				0.653	1.348	1.021	0.548	0.404	0.939	0.673	0.509		2741.3	2365.4	1791.4	3695.5	1696.2	2800	1502.2	1283.1	1106.7	2519.4
Q3TEA8	Hp1bp3	PE	Heterochromatin protein 1-binding protein 3 OS=Mus musculus GN=Hp1bp3 PE=1 SV=1	30.5054	20	36	20	554	60.829	9.7				0.961	1.216	1.124	1.091	1.005	0.975	1.098	1.387		1848.8	1571.2	1775.8	2248.7	1769.2	2077.5	2017.2	2233.5	1857.5	1610.7
Q6A026	Pds5a	PE	Sister chromatid cohesion protein PDS5 homolog A OS=Mus musculus GN=Pds5a PE=1 SV=3	24.3994	29	39	24	1332	150.232	7.85				0.834	1.34	1.339	0.668	0.703	1.019	0.803	0.624		2121.6	2110.3	1769.8	2842.9	1663.1	2840.6	1416.9	1290.9	1491.8	2070.3
O08749	Dld	PE	Dihydrolipoyl dehydrogenase, mitochondrial OS=Mus musculus GN=Dld PE=1 SV=2	32.22	14	26	14	509	54.238	7.9				0.849	0.977	0.774	1.241	0.917	0.756	0.667	1.143		2054.8	1362	1743.8	2007.5	1201.8	1591.4	2549.1	2060	1883.9	1802.1
P38647	Hspa9	PE	Stress-70 protein, mitochondrial OS=Mus musculus GN=Hspa9 PE=1 SV=3	38.8807	23	29	22	679	73.416	6.07				0.821	1.418	1.148	1.219	1.107	0.755	0.822	1.068		2080	1420.2	1708.3	2948.7	1547.3	2387.8	2535.3	2008.9	2301.8	1881.2
F6ZDS4	Tpr	PE	Nucleoprotein TPR OS=Mus musculus GN=Tpr PE=1 SV=1	11.3945	27	29	27	2431	273.824	5.03				0.676	0.69	0.593	0.608	0.667	0.866	0.807	0.832		2523.6	1570.4	1707	1740.9	1463.8	1497.1	1534.6	1509.6	1683.1	1814.1
O35129	Phb2	PE	Prohibitin-2 OS=Mus musculus GN=Phb2 PE=1 SV=1	50.8361	15	28	15	299	33.276	9.83				0.77	0.808	0.855	0.524	0.765	0.874	0.893	0.52		2189.5	1688.2	1686.7	1768.2	1725.9	1872.6	1147.1	1004.1	1675.7	1932.4
P05213	Tuba1b	PE	Tubulin alpha-1B chain OS=Mus musculus GN=Tuba1b PE=1 SV=2	43.9024	17	26	4	451	50.12	5.06				1.244	1.202	1.269	1.608	1.735	0.886	0.714	0.873		1354.1	1544.4	1684	1627.6	1244.1	1718.2	2177.4	1520.9	2348.9	1742.3
P56480	Atp5b	PE	ATP synthase subunit beta, mitochondrial OS=Mus musculus GN=Atp5b PE=1 SV=2	51.6068	19	36	19	529	56.265	5.34				1.019	1.236	1.124	0.859	1.585	0.93	0.656	0.67		1651.9	1800.7	1682.8	2041.8	1269.4	1856.6	1419.4	1297.2	2618.8	1936.5
P62908	Rps3	PE	40S ribosomal protein S3 OS=Mus musculus GN=Rps3 PE=1 SV=1	80.2469	19	63	19	243	26.657	9.66				0.897	1.008	1.22	1.392	1.118	0.934	8.335	1.011		1852.8	1741.5	1662.4	1868.2	15542.9	2260.8	2578.8	1884.7	2071.4	1864.8
Q62318	Trim28	PE	Transcription intermediary factor 1-beta OS=Mus musculus GN=Trim28 PE=1 SV=3	21.1031	18	27	18	834	88.791	5.77				1.073	0.982	0.964	1.024	1.348	0.897	1.056	1.096		1533	1396	1645.3	1505.5	1642.9	1478.2	1570.2	1705	2066.4	1555.7
P99024	Tubb5	PE	Tubulin beta-5 chain OS=Mus musculus GN=Tubb5 PE=1 SV=1	45.9459	16	44	6	444	49.639	4.89				1.233	1.064	1.151	1.315	1.797	0.946	0.701	0.826		1327	1602.2	1636.2	1411.5	1187.2	1526.8	1745.4	1399.9	2385.1	1694.3
P06151	Ldha	PE	L-lactate dehydrogenase A chain OS=Mus musculus GN=Ldha PE=1 SV=3	43.9759	14	26	13	332	36.475	7.74				1.748	1.236	1.801	0.776	3.529	1.195	0.593	0.538		934.4	1991.6	1633.4	1154.7	988.1	1682.8	725	896.8	3297.1	1666.9
Q8BJS4	Sun2	PE	SUN domain-containing protein 2 OS=Mus musculus GN=Sun2 PE=1 SV=3	32.9685	20	44	20	731	81.555	7.02				0.713	1.179	1.024	0.655	0.63	1.034	0.99	0.786		2275.7	1985.9	1621.7	2682.3	1901.7	2330.3	1489.7	1509	1433.7	1920.2
Q4VBD9	Gzf1	PE	GDNF-inducible zinc finger protein 1 OS=Mus musculus GN=Gzf1 PE=1 SV=2	1.69972	1	40	1	706	79.482	7.97				0.7	1.317	1.002	1.148	0.692	0.971	0.789	1.098		2302.6	1766	1612.3	3031.5	1435.6	2306.9	2644.1	1996.1	1593.3	1818.7
O88569	Hnrnpa2b1	PE	Heterogeneous nuclear ribonucleoproteins A2/B1 OS=Mus musculus GN=Hnrnpa2b1 PE=1 SV=2	44.4759	17	39	16	353	37.38	8.95				1.34	1.084	1.628	1.474	1.729	0.735	3.005	0.8		1179.2	1257	1579.9	1278.8	5137.9	1919.5	1737.6	1368.3	2039.2	1709.7
Q8BPU7	Elmo1	PE	Engulfment and cell motility protein 1 OS=Mus musculus GN=Elmo1 PE=1 SV=2	21.0454	16	26	15	727	83.882	6.28				0.987	1.248	1.314	0.811	1.056	1.077	0.834	0.843		1552.4	1693.1	1532.6	1937.2	1312.3	2040.4	1258.6	1325.6	1638.9	1572.8
P09411	Pgk1	PE	Phosphoglycerate kinase 1 OS=Mus musculus GN=Pgk1 PE=1 SV=4	30.6954	13	17	13	417	44.522	7.9				1.483	1.273	1.761	1.184	3.023	0.918	0.603	0.475		1028.5	1634	1525.7	1309	1073.9	1811.5	1217.4	846.2	3109.6	1779.7
Q3V3E1	Ubash3a	PE	Ubiquitin-associated and SH3 domain-containing protein A OS=Mus musculus GN=Ubash3a PE=1 SV=1	13.141	8	15	8	624	70.1	7.21				3.429	1.025	3.491	0.868	3.714	1.098	1.104	1.133		440.9	474.2	1512	452.1	476.8	1539.5	382.8	489.5	1637.6	431.9
Q9WTM5	Ruvbl2	PE	RuvB-like 2 OS=Mus musculus GN=Ruvbl2 PE=1 SV=3	49.2441	18	33	18	463	51.081	5.64				0.911	1.111	0.864	1.273	0.921	0.886	0.807	1.126		1658.9	1385.1	1511.7	1842.8	1261	1433.1	2111.1	1760.1	1527	1563.6
Q61635	Ifi47	PE	GTP-binding protein OS=Mus musculus GN=Ifi47 PE=1 SV=1	37.1429	15	23	13	420	46.755	6.74				0.944	1.188	1.253	0.598	1.02	0.941	0.695	0.597		1601.6	1630.2	1511.3	1902	1202.9	2006.2	958	1033.8	1633.7	1731.9
E9PZF0	Gm20390	PE	Nucleoside diphosphate kinase OS=Mus musculus GN=Gm20390 PE=3 SV=1	41.1985	8	13	3	267	30.181	8.72				1.597	1.207	1.524	1.025	2.687	0.918	0.514	0.51		925.5	1404.6	1477.6	1116.9	785.6	1410.6	948.8	779.5	2487	1529.5
P40124	Cap1	PE	Adenylyl cyclase-associated protein 1 OS=Mus musculus GN=Cap1 PE=1 SV=4	41.5612	18	26	18	474	51.532	7.52				1.333	1.013	1.43	0.818	2.475	0.949	0.618	0.772		1103.8	1435.8	1471.5	1118.5	934.7	1578.4	902.4	1167.8	2732.3	1513.1
Q9CQC6	Bzw1	PE	Basic leucine zipper and W2 domain-containing protein 1 OS=Mus musculus GN=Bzw1 PE=1 SV=1	25.2983	12	21	11	419	48.013	5.92				0.829	1.402	1.404	0.556	0.591	1.002	0.742	0.49		1764.5	1752.5	1463.3	2473.8	1296.9	2478	980.9	856.4	1042.6	1748.3
P35486	Pdha1	PE	Pyruvate dehydrogenase E1 component subunit alpha, somatic form, mitochondrial OS=Mus musculus GN=Pdha1 PE=1 SV=1	39.2308	17	37	17	390	43.204	8.19				0.485	1.278	0.582	1.294	0.438	0.594	0.566	0.784		3006.7	1121.3	1458	3843.4	1068.4	1750.2	3889.8	1480	1318.1	1888.2
Q93092	Taldo1	PE	Transaldolase OS=Mus musculus GN=Taldo1 PE=1 SV=2	39.7626	15	22	15	337	37.363	7.03				1.237	1.108	1.387	0.751	2.291	0.917	0.483	0.5		1172.3	1673.6	1450.3	1299.4	882.8	1626.1	880.4	913.1	2685.5	1826.1
P70168	Kpnb1	PE	Importin subunit beta-1 OS=Mus musculus GN=Kpnb1 PE=1 SV=2	32.3059	22	35	22	876	97.122	4.78				0.735	1.264	0.983	0.652	0.619	0.971	0.654	0.595		1972.2	1801.3	1448.8	2493.5	1214	1939.1	1286.2	1103.1	1221.8	1854.9
Q60597	Ogdh	PE	2-oxoglutarate dehydrogenase, mitochondrial OS=Mus musculus GN=Ogdh PE=1 SV=3	20.5279	18	26	18	1023	116.375	6.83				0.871	1.336	0.963	1.293	0.933	0.845	0.771	1.148		1655.3	1232.2	1442.1	2212	1124.1	1594.7	2139.7	1674.7	1544.4	1458.8
Q8VEM8	Slc25a3	PE	Phosphate carrier protein, mitochondrial OS=Mus musculus GN=Slc25a3 PE=1 SV=1	31.6527	13	29	13	357	39.606	9.26				0.966	1.216	1.224	0.976	1.196	0.967	2.078	0.829		1489.9	1509.7	1439.1	1811.2	3245.6	1822.9	1453.4	1294.4	1782	1561.6
P14131	Rps16	PE	40S ribosomal protein S16 OS=Mus musculus GN=Rps16 PE=1 SV=4	75.3425	17	67	17	146	16.435	10.21				0.873	0.834	0.961	1.346	1.024	0.93	10.084	1.106		1647.9	1426.8	1438.4	1374.8	15479	1583.1	2217.4	1698.2	1688.1	1534.9
Q9JL26	Fmnl1	PE	Formin-like protein 1 OS=Mus musculus GN=Fmnl1 PE=1 SV=1	19.4698	17	24	17	1094	121.983	5.82				0.961	1.449	1.322	0.776	1.083	1.098	0.905	0.737		1481.9	1511.5	1423.9	2146.9	1245	1959	1150.2	1014.3	1604.5	1376.3
Q8BV49	Pyhin1	PE	Pyrin and HIN domain-containing protein 1 OS=Mus musculus GN=Pyhin1 PE=1 SV=1	39.7619	14	24	13	420	46.857	9.45				1.505	1.19	1.214	1.449	1.977	1.028	2.04	1.123		930	1070	1399.6	1106.5	2124.1	1128.6	1348	1168.9	1838.7	1041
Q9DBR0	Akap8	PE	A-kinase anchor protein 8 OS=Mus musculus GN=Akap8 PE=1 SV=1	27.5109	18	30	18	687	76.247	5.14				0.724	0.856	0.604	2.171	1.249	0.908	0.774	1.982		1897.5	1317.1	1374.6	1624.9	1122.7	1145.3	4118.5	2873.8	2370.7	1449.9
Q60668	Hnrnpd	PE	Heterogeneous nuclear ribonucleoprotein D0 OS=Mus musculus GN=Hnrnpd PE=1 SV=2	30.4225	11	19	9	355	38.33	7.81				1.847	1.509	2.037	1.471	2.426	0.844	1.515	0.659		740.6	1016.7	1368.1	1117.3	1825.5	1508.9	1089.6	794.4	1796.4	1204.6
P05202	Got2	PE	Aspartate aminotransferase, mitochondrial OS=Mus musculus GN=Got2 PE=1 SV=1	21.8605	13	21	13	430	47.381	9				1.137	1.083	1.134	0.991	2.059	0.881	0.539	0.606		1201.4	1396.1	1365.5	1300.7	853.9	1362.3	1190.2	961.2	2473.6	1585.2
P27659	Rpl3	PE	60S ribosomal protein L3 OS=Mus musculus GN=Rpl3 PE=1 SV=3	32.0099	12	20	12	403	46.081	10.21				1.264	1.191	1.298	0.918	1.375	1.06	1.281	1.05		1069.1	1112.5	1351.4	1273.2	1343.6	1388.2	981.5	1101.2	1470.4	1049.2
P08249	Mdh2	PE	Malate dehydrogenase, mitochondrial OS=Mus musculus GN=Mdh2 PE=1 SV=3	50.8876	14	25	14	338	35.589	8.68				1.313	1.016	1.427	0.876	2.446	0.886	0.593	0.581		1022.6	1344.4	1343	1039	900	1459	895.7	882.5	2500.8	1518.1
P80315	Cct4	PE	T-complex protein 1 subunit delta OS=Mus musculus GN=Cct4 PE=1 SV=3	24.4898	14	19	13	539	58.03	8.02				1.205	0.981	1.153	1.104	1.616	0.874	0.701	0.857		1102.1	1139	1328	1081.4	913.5	1271	1217.2	1116	1781.3	1302.9
Q62293	Tgtp1	PE	T-cell-specific guanine nucleotide triphosphate-binding protein 1 OS=Mus musculus GN=Tgtp1 PE=1 SV=1	33.7349	15	28	14	415	47.091	5.74				0.798	1.203	0.826	1.217	0.934	0.847	0.602	0.898		1646.5	1393.1	1314	1980.4	990.2	1360.1	2004.2	1478	1537.9	1645.7
P26443	Glud1	PE	Glutamate dehydrogenase 1, mitochondrial OS=Mus musculus GN=Glud1 PE=1 SV=1	29.7491	15	20	15	558	61.298	8				1.19	1.242	1.393	1.244	2.077	0.841	0.734	0.953		1101.7	1237.4	1311.4	1368.8	1079.8	1534.8	1370.9	1401.5	2288.8	1471.1
P14152	Mdh1	PE	Malate dehydrogenase, cytoplasmic OS=Mus musculus GN=Mdh1 PE=1 SV=3	47.3054	16	24	16	334	36.488	6.58				1.351	1.115	1.852	0.842	2.543	1.065	0.694	0.566		967.2	1490.8	1306.7	1078.7	971.1	1791.5	814.3	791.5	2459.5	1399.2
Q99JY3	Gimap4	PE	GTPase IMAP family member 4 OS=Mus musculus GN=Gimap4 PE=1 SV=1	54.7945	10	19	10	219	24.539	7.02				1.384	1.06	1.534	0.677	2.514	0.975	0.659	0.633		928.8	1330.6	1285.9	984.1	899	1424.6	628.7	863.9	2334.9	1364.8
P27773	Pdia3	PE	Protein disulfide-isomerase A3 OS=Mus musculus GN=Pdia3 PE=1 SV=2	36.4356	19	24	19	505	56.643	6.21				1.289	1.162	1.551	0.771	2.686	0.866	0.569	0.533		991.4	1365.4	1277.7	1151.6	897.5	1537.9	764	841.3	2662.7	1576.9
P30681	Hmgb2	PE	High mobility group protein B2 OS=Mus musculus GN=Hmgb2 PE=1 SV=3	45.7143	11	19	9	210	24.147	7.31				1.385	1.567	1.593	1.044	2.53	1.086	0.785	0.63		920.2	1601.9	1274.1	1442	1158.5	1465.5	960.3	928.8	2328.3	1475.5
Q3V3R1	Mthfd1l	PE	Monofunctional C1-tetrahydrofolate synthase, mitochondrial OS=Mus musculus GN=Mthfd1l PE=1 SV=2	21.9038	20	27	19	977	105.662	7.02				0.757	1.262	0.94	1.171	1.052	0.718	0.683	1.134		1674	1063.8	1267.5	2113	1012	1574.3	1959.7	1680.3	1761.6	1481.6
P80314	Cct2	PE	T-complex protein 1 subunit beta OS=Mus musculus GN=Cct2 PE=1 SV=4	42.6168	17	28	17	535	57.441	6.4				1.008	1.066	0.977	1.027	1.305	0.862	0.658	0.781		1254.6	1242.3	1265.1	1336.8	948.9	1226.3	1289	1125.6	1636.8	1441.1
P14869	Rplp0	PE	60S acidic ribosomal protein P0 OS=Mus musculus GN=Rplp0 PE=1 SV=3	29.0221	9	15	9	317	34.195	6.25				1.42	0.946	1.296	1.113	1.337	0.873	1.037	0.888		883.4	814.4	1254.2	835.6	967.1	1144.7	982.8	827.8	1180.7	932.7
P54071	Idh2	PE	Isocitrate dehydrogenase [NADP], mitochondrial OS=Mus musculus GN=Idh2 PE=1 SV=3	30.531	13	16	12	452	50.874	8.69				0.951	1.306	0.996	1.243	1.311	0.79	0.632	0.896		1314.6	1139.4	1250.7	1717.3	912	1309.2	1633.4	1293.3	1723.5	1442.7
A2I7N0			TREMBL:A2I7N0;Q28922;Q3ZEJ6 (Bos taurus) SERPINA3-4	19.2214	11	17	3	411	46.282	6.32		Y	Y	0.798	1.054	0.756	1.292	0.778	0.66	0.558	0.88		1561.1	1149.6	1246.1	1645.3	971.5	1180.2	2016.6	1532.5	1214.9	1741.9
P61979	Hnrnpk	PE	Heterogeneous nuclear ribonucleoprotein K OS=Mus musculus GN=Hnrnpk PE=1 SV=1	27.2138	13	23	13	463	50.944	5.54				1.386	1.201	1.334	1.131	2.367	0.841	0.86	0.634		891.7	1145.6	1235.9	1070.6	1171.4	1190	1008.9	862.9	2110.3	1361.8
Q02053	Uba1	PE	Ubiquitin-like modifier-activating enzyme 1 OS=Mus musculus GN=Uba1 PE=1 SV=1	21.0775	18	23	18	1058	117.734	5.66				1.555	1.166	1.463	0.918	2.864	1.004	0.674	0.71		789.4	1175.2	1227.4	920.1	788.6	1155.3	724.6	831.3	2260.6	1170.3
Q9WU78	Pdcd6ip	PE	Programmed cell death 6-interacting protein OS=Mus musculus GN=Pdcd6ip PE=1 SV=3	15.1899	14	18	14	869	95.964	6.52				1.25	1.353	1.521	1.17	2.101	0.982	0.919	0.804		979.4	1282.8	1224.7	1325.2	1200.6	1490	1146.2	1050.4	2057.7	1306.3
Q64511	Top2b	PE	DNA topoisomerase 2-beta OS=Mus musculus GN=Top2b PE=1 SV=2	12.8412	22	26	22	1612	181.795	8.29				0.857	1.385	1.158	2.05	1.103	0.515	1.05	0.925		1422.9	908.1	1219.6	1971.1	1850.5	1647.4	2916.5	1630	1568.9	1763
Q76MZ3	Ppp2r1a	PE	Serine/threonine-protein phosphatase 2A 65 kDa regulatory subunit A alpha isoform OS=Mus musculus GN=Ppp2r1a PE=1 SV=3	26.8251	14	19	8	589	65.281	5.11				0.987	1.14	1.061	0.792	1.079	0.948	0.639	0.639		1234.9	1232.5	1218.5	1408.3	830.4	1310.1	978.1	830.3	1332.3	1299.8
Q01853	Vcp	PE	Transitional endoplasmic reticulum ATPase OS=Mus musculus GN=Vcp PE=1 SV=4	28.7841	21	29	21	806	89.266	5.26				1.1	0.957	1.083	0.896	1.836	0.96	0.658	0.649		1107.7	1347.3	1218.3	1060.2	922.4	1199.5	992.9	909.9	2033.1	1402.8
Q8VIJ6	Sfpq	PE	Splicing factor, proline- and glutamine-rich OS=Mus musculus GN=Sfpq PE=1 SV=1	28.3262	19	30	17	699	75.394	9.44				1.042	0.929	1.029	1.093	1.586	0.886	1.817	0.825		1157.1	1223	1205.6	1075.3	2508.3	1190.8	1265.2	1138.4	1835.5	1380.7
P07356	Anxa2	PE	Annexin A2 OS=Mus musculus GN=Anxa2 PE=1 SV=2	40.118	14	24	14	339	38.652	7.69				0.804	0.703	1.862	1.218	0.789	1.229	1.124	1.044		1493.3	1508.8	1200.2	1049.5	1380	2780.1	1819.2	1281.7	1177.8	1227.5
Q99JY9	Actr3	PE	Actin-related protein 3 OS=Mus musculus GN=Actr3 PE=1 SV=3	32.7751	12	22	12	418	47.327	5.88				0.976	0.818	0.887	0.734	1.263	0.856	0.654	0.674		1228.1	1049.2	1198.7	1004.5	801.4	1088.9	900.8	826.6	1550.8	1226.4
Q920N2	Hlcs	PE	Biotin--protein ligase OS=Mus musculus GN=Hlcs PE=1 SV=1	22.0222	13	22	13	722	78.467	5.34				0.924	0.989	0.748	1.221	0.825	0.892	0.657	1.129		1281	1008	1184.2	1266.2	743	958.4	1563.7	1276.4	1057.4	1130.2
P80317	Cct6a	PE	T-complex protein 1 subunit zeta OS=Mus musculus GN=Cct6a PE=1 SV=3	33.145	14	22	14	531	57.968	7.08				1.287	1.176	1.183	1.141	1.826	0.976	0.619	0.827		908.6	1064.5	1169.4	1068.8	675.5	1075.3	1036.9	902.3	1659.3	1090.8
Q00PI9	Hnrnpul2	PE	Heterogeneous nuclear ribonucleoprotein U-like protein 2 OS=Mus musculus GN=Hnrnpul2 PE=1 SV=2	17.047	13	16	13	745	84.888	4.89				1.192	1.115	1.195	1.342	1.253	0.742	1.275	0.856		979.3	819.4	1167.7	1092.4	1409	1170.3	1314	945.8	1227.5	1104.7
P22682	Cbl	PE	E3 ubiquitin-protein ligase CBL OS=Mus musculus GN=Cbl PE=1 SV=3	17.5246	14	18	14	913	100.5	6.67				2.273	0.889	2.315	0.919	2.561	0.837	0.708	0.852		512.3	430.6	1164.7	455.6	364.2	1186.3	471	438.4	1312.3	514.4
P47753	Capza1	PE	F-actin-capping protein subunit alpha-1 OS=Mus musculus GN=Capza1 PE=1 SV=4	39.5105	8	17	6	286	32.919	5.55				1.387	0.869	1.24	0.923	1.279	1.269	0.893	1.318		837.9	1003.1	1161.8	728.2	705.9	1039	773.5	1041.4	1071.6	790.4
D3Z6Q9	Bin2	PE	Bridging integrator 2 OS=Mus musculus GN=Bin2 PE=1 SV=1	26.7894	13	18	13	489	52.522	5.34				1.162	0.978	1.339	0.827	1.829	1.022	0.578	0.783		998	1417.8	1160	975.8	802.1	1336.7	825.1	1085.3	1824.9	1386.8
Q9D051	Pdhb	PE	Pyruvate dehydrogenase E1 component subunit beta, mitochondrial OS=Mus musculus GN=Pdhb PE=1 SV=1	35.9331	10	22	10	359	38.912	6.87				0.502	1.265	0.545	1.316	0.434	0.523	0.568	0.745		2296.6	786.3	1152.9	2904.6	852.8	1252	3022.1	1119.5	996.2	1502.1
A2BGH0	Bpifb4	PE	BPI fold-containing family B member 4 OS=Mus musculus GN=Bpifb4 PE=2 SV=1	5.02431	3	3	3	617	65.682	5.24				1.177	0.209	0.644	1.823	0.449	0.854	0.267	0.547		979.1	1068.4	1152.1	204.5	333.6	630.2	1785.1	683.6	439.4	1250.9
Q6PB66	Lrpprc	PE	Leucine-rich PPR motif-containing protein, mitochondrial OS=Mus musculus GN=Lrpprc PE=1 SV=2	9.5546	14	16	14	1392	156.516	6.83				0.76	0.995	0.959	0.634	0.753	0.782	0.636	0.581		1514.2	1153.8	1151.5	1506.6	937.9	1452	959.6	856.6	1140.4	1475.5
P18760	Cfl1	PE	Cofilin-1 OS=Mus musculus GN=Cfl1 PE=1 SV=3	57.8313	8	17	8	166	18.548	8.09				1.113	0.978	1.414	0.913	2.103	0.854	0.707	0.423		1030.2	1295.4	1146.5	1007.1	1072.6	1457	940.2	640.8	2166.7	1516.4
Q9JI11	Stk4	PE	Serine/threonine-protein kinase 4 OS=Mus musculus GN=Stk4 PE=1 SV=1	34.4969	15	19	15	487	55.506	5.19				1.084	0.989	1.044	1.075	1.666	0.906	0.75	0.862		1043.7	1096.7	1130.9	1032.3	908	1090	1122	1043	1739.1	1210.1
Q9WV32	Arpc1b	PE	Actin-related protein 2/3 complex subunit 1B OS=Mus musculus GN=Arpc1b PE=1 SV=4	20.1613	7	12	7	372	41.037	8.35				0.924	0.673	0.841	0.701	1.152	0.707	0.568	0.568		1220.8	870.6	1127.9	821.9	698.6	1026.3	855.8	698.7	1406.3	1230.7
P14429	H2-Q7	PE	H-2 class I histocompatibility antigen, Q7 alpha chain OS=Mus musculus GN=H2-Q7 PE=1 SV=1	28.1437	8	19	5	334	37.9	6.29				1.07	1.208	1.201	0.687	0.901	0.995	0.82	0.737		1053.8	1120.5	1127.3	1272.5	923.9	1266.1	723.6	829.9	949	1126.2
Q6ZWN5	Rps9	PE	40S ribosomal protein S9 OS=Mus musculus GN=Rps9 PE=1 SV=3	53.0928	13	19	13	194	22.578	10.65				1.284	1.058	1.255	1.105	1.206	0.889	1.486	0.842		876.3	910.3	1125	926.9	1522.3	1099.7	968.7	862.5	1057.2	1024.3
P50247	Ahcy	PE	Adenosylhomocysteinase OS=Mus musculus GN=Ahcy PE=1 SV=3	26.6204	11	14	11	432	47.657	6.54				1.45	1.123	1.57	0.944	2.881	1.039	0.693	0.614		774.7	1148.8	1123.5	869.8	766.3	1216.1	731.4	678.9	2232.1	1105.8
Q9CPR4	Rpl17	PE	60S ribosomal protein L17 OS=Mus musculus GN=Rpl17 PE=1 SV=3	40.2174	7	18	7	184	21.409	10.18				1.152	1.17	1.183	1.137	1.108	1.005	2.564	1.154		967.3	929.6	1114	1131.4	2371.8	1144.5	1100.1	1067.8	1071.7	925.1
Q61937	Npm1	PE	Nucleophosmin OS=Mus musculus GN=Npm1 PE=1 SV=1	36.6438	11	15	11	292	32.54	4.77				1.224	1.006	1.226	1.042	1.426	0.805	0.626	0.729		908	959.3	1111.1	913.8	746.3	1113.2	945.9	868.2	1295.1	1191.4
P36371	Tap2	PE	Antigen peptide transporter 2 OS=Mus musculus GN=Tap2 PE=1 SV=1	21.51	14	19	14	702	77.396	7.24				0.955	1.472	1.334	0.753	1.004	1.01	0.813	0.589		1162.4	1295.4	1109.9	1710.6	1042.9	1550.2	875.1	755	1167.3	1282.8
Q8BGH2	Samm50	PE	Sorting and assembly machinery component 50 homolog OS=Mus musculus GN=Samm50 PE=1 SV=1	32.4094	18	30	18	469	51.831	6.8				0.484	0.697	0.583	0.434	0.294	0.598	0.444	0.422		2271.1	1292	1099.7	1582	959.8	1325.1	984.8	910.8	668.5	2159.7
Q99LX0	Park7	PE	Protein DJ-1 OS=Mus musculus GN=Park7 PE=1 SV=1	42.328	9	13	9	189	20.008	6.77				1.33	1.043	1.641	0.89	2.618	1.025	0.714	0.566		822.5	1231.8	1093.9	858.2	858.2	1349.6	732	679.6	2153.5	1201.4
D3Z2H9	Tpm3-rs7	PE	Uncharacterized protein OS=Mus musculus GN=Tpm3-rs7 PE=3 SV=1	32.6613	11	14	5	248	28.974	4.81				0.711	0.61	0.648	0.527	0.736	0.74	0.686	0.469		1532.5	1123.6	1089.3	934.1	1041.7	992.5	807	711.6	1127.4	1518.6
P11983	Tcp1	PE	T-complex protein 1 subunit alpha OS=Mus musculus GN=Tcp1 PE=1 SV=3	33.8129	15	19	15	556	60.411	6.16				1.127	1.021	1.033	0.983	1.517	1.027	0.653	0.907		955.8	1053.7	1077.2	975.6	670.1	987	939.1	930.6	1449.6	1026.1
P80316	Cct5	PE	T-complex protein 1 subunit epsilon OS=Mus musculus GN=Cct5 PE=1 SV=1	17.3752	12	16	11	541	59.586	6.02				1.002	0.853	0.919	0.907	1.379	0.875	0.619	0.78		1074.9	939	1077.2	916.8	663.9	988.1	974.6	836.9	1482.6	1072.9
P20029	Hspa5	PE	78 kDa glucose-regulated protein OS=Mus musculus GN=Hspa5 PE=1 SV=3	29.1603	18	23	16	655	72.377	5.16				0.964	1.008	1.373	1.019	1.4	0.928	0.92	0.837		1110.1	1103.7	1070.3	1118.6	1093.7	1523.7	1131.7	994.9	1554	1189.1
Q99JY0	Hadhb	PE	Trifunctional enzyme subunit beta, mitochondrial OS=Mus musculus GN=Hadhb PE=1 SV=1	31.3684	14	27	13	475	51.353	9.38				0.904	1.288	1.122	1.213	1.195	0.785	2.546	0.965		1183.5	1023.1	1069.7	1524.8	3316	1328.2	1435.2	1256.5	1414.5	1302.7
Q6P4T2	Snrnp200	PE	U5 small nuclear ribonucleoprotein 200 kDa helicase OS=Mus musculus GN=Snrnp200 PE=1 SV=1	11.47	23	26	23	2136	244.392	6.06				1.128	1.273	1.155	1.236	1.36	0.829	0.944	1.019		947.5	835.8	1068.3	1206.6	951.6	1094.6	1170.6	1026.4	1288.3	1007.7
P27661	H2afx	PE	Histone H2AX OS=Mus musculus GN=H2afx PE=1 SV=2	65.035	10	79	4	143	15.133	10.74				0.721	1.494	1.678	3.123	0.716	0.414	2.571	0.904		1479.7	899.6	1067.5	2210.7	5590.5	2483.4	4621.4	1964.7	1059.6	2174.3
Q60930	Vdac2	PE	Voltage-dependent anion-selective channel protein 2 OS=Mus musculus GN=Vdac2 PE=1 SV=2	39.322	10	14	10	295	31.713	7.49				1.414	1.293	1.456	0.937	2.054	0.917	0.698	0.508		754.4	968.6	1066.6	975.3	736.5	1098.4	707.3	536.6	1549.8	1055.9
P25444	Rps2	PE	40S ribosomal protein S2 OS=Mus musculus GN=Rps2 PE=1 SV=3	48.8055	14	27	14	293	31.212	10.24				1.216	1.076	1.45	1.338	1.495	0.913	5.871	1.127		873.3	867.7	1061.8	940	5577.1	1265.9	1168.2	1070.9	1305.3	949.9
Q9JLI8	Sart3	PE	Squamous cell carcinoma antigen recognized by T-cells 3 OS=Mus musculus GN=Sart3 PE=1 SV=1	17.7755	17	24	17	962	109.55	5.24				0.972	1.207	0.898	1.216	0.944	0.98	0.776	1.086		1087.8	954.2	1057.7	1312.6	755.7	976.5	1323.1	1057.9	1026.7	973.9
Q569Z6	Thrap3	PE	Thyroid hormone receptor-associated protein 3 OS=Mus musculus GN=Thrap3 PE=1 SV=1	16.5089	16	23	16	951	108.114	10.17				0.968	1.127	0.977	1.428	1.369	0.925	2.122	1.346		1086	981	1051.1	1223.6	2251.7	1060.7	1551.2	1428.1	1486.5	1060.9
P59999	Arpc4	PE	Actin-related protein 2/3 complex subunit 4 OS=Mus musculus GN=Arpc4 PE=1 SV=3	32.1429	6	11	6	168	19.654	8.43				0.996	0.769	0.941	0.693	1.214	0.773	0.611	0.514		1041.4	889.2	1036.9	801.3	703.2	979.6	721.9	591.8	1264.6	1150.4
P62245	Rps15a	PE	40S ribosomal protein S15a OS=Mus musculus GN=Rps15a PE=1 SV=2	39.2308	7	14	7	130	14.83	10.13				1.58	1.065	1.454	1.702	1.467	0.899	5.026	0.944		652.4	666.1	1031.1	694.7	3723.7	948.5	1110.3	699.2	957.2	740.9
Q9CX86	Hnrnpa0	PE	Heterogeneous nuclear ribonucleoprotein A0 OS=Mus musculus GN=Hnrnpa0 PE=1 SV=1	47.541	13	25	12	305	30.512	9.31				1.004	1.035	1.237	1.344	1.279	0.775	3.768	0.788		1019.6	965.9	1023.6	1055.5	4695.8	1261.4	1369.9	981.7	1304.3	1246.3
Q9R190	Mta2	PE	Metastasis-associated protein MTA2 OS=Mus musculus GN=Mta2 PE=1 SV=1	22.9042	17	23	12	668	74.983	9.67				0.941	1.16	1.163	0.989	1.348	1.056	1.072	1.156		1079.2	1104.7	1015.7	1252.2	1120.9	1255.1	1067.6	1209	1454.6	1045.9
P50136	Bckdha	PE	2-oxoisovalerate dehydrogenase subunit alpha, mitochondrial OS=Mus musculus GN=Bckdha PE=1 SV=1	38.6878	14	27	14	442	50.339	8.06				0.645	1.078	0.801	1.055	0.884	0.894	0.912	1.393		1574.2	1104.8	1015.1	1697.5	1127.8	1261.6	1660.6	1722.1	1391.8	1236.5
Q8BWT1	Acaa2	PE	3-ketoacyl-CoA thiolase, mitochondrial OS=Mus musculus GN=Acaa2 PE=1 SV=3	61.2091	16	31	16	397	41.803	8.09				0.923	0.94	1.033	1.112	1.208	0.861	2.95	1.069		1088.8	949.3	1005.3	1023.7	3254	1124.6	1210.4	1178.9	1315.7	1103
O54824	Il16	PE	Pro-interleukin-16 OS=Mus musculus GN=Il16 PE=1 SV=3	8.69894	10	15	10	1322	141.347	7.78				1.373	2.522	1.226	1.059	1.9	0.798	0.586	0.659		728.8	947	1000.5	1837.9	695.1	893.5	771.5	781.2	1384.9	1186.1
Q8C2K5	Rasal3	PE	RAS protein activator like-3 OS=Mus musculus GN=Rasal3 PE=1 SV=1	25.3602	26	32	26	1041	114.71	8.98				0.898	1	1.033	1.068	1.12	1.006	2.877	1.037		1113	1106.1	999.1	1113.3	3163.6	1149.5	1188.6	1140.3	1246.9	1099.7
A0A140T8M7	Rpl23a-ps3	PE	Uncharacterized protein OS=Mus musculus GN=Rpl23a-ps3 PE=3 SV=1	43.5897	9	24	9	156	17.687	10.42				0.949	1.169	1.266	1.18	1.192	1.208	4.508	1.012		1042.8	1199.6	990.1	1218.6	4477.1	1320	1230.5	1005.1	1242.6	993.2
O70133	Dhx9	PE	ATP-dependent RNA helicase A OS=Mus musculus GN=Dhx9 PE=1 SV=2	16.2319	19	23	19	1380	149.381	6.83				1.238	1.174	1.383	1.713	1.248	0.695	1.422	0.866		795.7	665.3	985.3	933.9	1361.8	1100.9	1363.3	829.3	992.7	957.7
O88342	Wdr1	PE	WD repeat-containing protein 1 OS=Mus musculus GN=Wdr1 PE=1 SV=3	20.297	11	18	11	606	66.365	6.6				1.15	0.974	1.151	0.737	1.823	0.949	0.588	0.499		852.9	1084.2	980.5	830.9	672.3	981.6	628.7	570.3	1555.1	1142.9
P11103	Parp1	PE	Poly [ADP-ribose] polymerase 1 OS=Mus musculus GN=Parp1 PE=1 SV=3	9.87167	9	9	9	1013	113.028	8.95				1.724	1.207	1.219	1.254	1.634	1.068	1.968	0.969		567.5	630.8	978.3	684.9	1162.4	691.6	711.9	572.2	927.5	590.7
P24527	Lta4h	PE	Leukotriene A-4 hydrolase OS=Mus musculus GN=Lta4h PE=1 SV=4	23.8953	15	17	15	611	69.007	6.42				1.442	1.149	1.742	1.01	2.942	1.086	0.644	0.637		678	1140.2	977.5	779.2	676.7	1181.1	684.6	669.1	1995	1050.2
P19253	Rpl13a	PE	60S ribosomal protein L13a OS=Mus musculus GN=Rpl13a PE=1 SV=4	29.064	8	10	8	203	23.449	11.02				1.393	1.168	1.338	1.03	1.2	1.064	1.034	1.035		696.8	743.6	970.8	814	722.7	932.4	717.8	723.1	836.4	698.9
Q9Z1N5	Ddx39b	PE	Spliceosome RNA helicase Ddx39b OS=Mus musculus GN=Ddx39b PE=1 SV=1	27.3364	12	18	6	428	49.004	5.67				1.499	1.263	1.65	1.256	1.576	0.904	1.133	0.902		646.7	653.1	969.6	816.6	818.6	1067.2	812.1	651.8	1018.9	722.3
P40142	Tkt	PE	Transketolase OS=Mus musculus GN=Tkt PE=1 SV=1	24.8796	13	18	13	623	67.588	7.5				1.233	1.064	1.382	0.815	2.409	0.919	0.58	0.593		784.9	1007	967.4	835.3	635.5	1084.5	640	649.2	1891	1095.6
P47911	Rpl6	PE	60S ribosomal protein L6 OS=Mus musculus GN=Rpl6 PE=1 SV=3	36.1486	11	17	11	296	33.489	10.7				1.433	1.118	1.447	0.852	1.725	1.073	1.385	0.912		673.1	763.1	964.5	752.4	985.3	974.1	573.4	648.7	1161	711.3
P62082	Rps7	PE	40S ribosomal protein S7 OS=Mus musculus GN=Rps7 PE=2 SV=1	55.1546	15	40	15	194	22.113	10.1				1.042	1.036	1.238	1.616	1.428	0.936	5.594	0.964		925.2	1009.6	964.3	958.2	6034	1145.6	1495	1039.8	1321	1078.7
P62830	Rpl23	PE	60S ribosomal protein L23 OS=Mus musculus GN=Rpl23 PE=1 SV=1	61.4286	9	19	9	140	14.856	10.51				1.318	1.2	1.23	1.611	1.166	1.017	4.536	1.299		731.8	728.3	964.3	878.2	3249.7	899.9	1179.2	930.6	852.9	716.5
Q8BG05	Hnrnpa3	PE	Heterogeneous nuclear ribonucleoprotein A3 OS=Mus musculus GN=Hnrnpa3 PE=1 SV=1	25.3298	10	23	9	379	39.628	9.01				1.399	1.038	1.685	1.608	1.81	0.707	2.328	0.791		686.9	654.1	961.1	713.1	2151.9	1157.2	1104.4	731.2	1243.1	924.6
Q99PV0	Prpf8	PE	Pre-mRNA-processing-splicing factor 8 OS=Mus musculus GN=Prpf8 PE=1 SV=2	6.72377	17	17	17	2335	273.443	8.84				1.084	1.327	1.176	1.307	1.626	0.784	0.988	1.025		884.9	739.9	959.1	1174.5	932.6	1040.6	1156.8	967.6	1439.1	943.8
Q62167	Ddx3x	PE	ATP-dependent RNA helicase DDX3X OS=Mus musculus GN=Ddx3x PE=1 SV=3	34.7432	21	25	20	662	73.056	7.18				0.906	1.032	1.003	1.099	1.171	0.869	2.553	0.925		1058.1	976.8	958.2	1092.1	2869.3	1060.9	1162.8	1039.9	1239	1124
Q3TBD2	Hmha1	PE	Minor histocompatibility protein HA-1 OS=Mus musculus GN=Hmha1 PE=1 SV=2	12.9928	12	15	12	1116	122.825	5.94				1.307	1.044	1.558	0.944	2.171	1.03	1.014	1.027		730.3	867.7	954.3	762.2	854.1	1137.6	689.3	864.4	1585.5	842.1
Q8C2Q3	Rbm14	PE	RNA-binding protein 14 OS=Mus musculus GN=Rbm14 PE=1 SV=1	31.6891	22	40	22	669	69.406	9.67				0.943	0.887	1.054	1.108	1.009	0.899	4.395	1.129		1007.8	901.3	950.4	893.6	4406.6	1061.9	1117	1131.7	1017.1	1002.6
Q921M3	Sf3b3	PE	Splicing factor 3B subunit 3 OS=Mus musculus GN=Sf3b3 PE=1 SV=1	11.9967	14	19	14	1217	135.465	5.26				0.971	1.328	1.023	1.23	1.31	0.705	0.711	0.771		976.1	795.6	948	1296.8	802.2	999.1	1200.6	870	1279	1128.7
P62281	Rps11	PE	40S ribosomal protein S11 OS=Mus musculus GN=Rps11 PE=1 SV=3	49.3671	11	22	11	158	18.419	10.3				1.171	1.178	1.419	1.725	1.255	0.943	7.61	1.334		804.9	732.5	942.6	948.2	5910.1	1142.1	1388.5	1036.2	1010.3	776.6
Q61599	Arhgdib	PE	Rho GDP-dissociation inhibitor 2 OS=Mus musculus GN=Arhgdib PE=1 SV=3	38.5	6	11	6	200	22.836	5.11				1.367	1.205	1.536	1.065	2.805	0.909	0.518	0.555		685.2	1076.2	936.5	825.4	613.2	1052.6	729.9	657.3	1921.7	1183.7
Q9JHU4	Dync1h1	PE	Cytoplasmic dynein 1 heavy chain 1 OS=Mus musculus GN=Dync1h1 PE=1 SV=2	4.13437	22	22	22	4644	531.71	6.42				1.054	1.206	1.003	1.163	1.496	0.845	0.64	0.764		887.7	879.5	935.4	1070.6	665.6	890.7	1032.5	795.1	1328.3	1040.8
P84228	Hist1h3b	PE	Histone H3.2 OS=Mus musculus GN=Hist1h3b PE=1 SV=2	51.4706	8	47	8	136	15.379	11.27				0.596	1.077	1.519	2.403	0.693	0.421	2.532	0.817		1556.4	880.7	928.2	1676.8	5293.6	2364.5	3739.8	1707.9	1078.6	2090.3
P62242	Rps8	PE	40S ribosomal protein S8 OS=Mus musculus GN=Rps8 PE=1 SV=2	44.2308	9	12	9	208	24.19	10.32				1.238	1.234	1.562	0.898	1.532	1.118	2.719	1.158		747.4	746.5	925.3	922.4	1815.6	1167.7	670.9	773	1144.8	667.6
Q80UG5	Sept9	PE	Septin-9 OS=Mus musculus GN=Sept9 PE=1 SV=1	12.8645	9	14	9	583	65.534	8.9				1.219	1.025	1.08	0.972	1.799	0.894	0.638	0.705		758.5	910	924.4	777.6	649.9	819.2	737.6	717.5	1364.4	1017.9
Q60605	Myl6	PE	Myosin light polypeptide 6 OS=Mus musculus GN=Myl6 PE=1 SV=3	60.2649	9	16	9	151	16.919	4.65				0.435	0.367	0.253	0.237	0.18	0.602	0.496	0.38		2106.5	861.3	916.1	774.1	709.6	532.9	499.8	543.8	379.2	1431.5
Q9R0X4	Acot9	PE	Acyl-coenzyme A thioesterase 9, mitochondrial OS=Mus musculus GN=Acot9 PE=1 SV=1	29.6128	14	21	14	439	50.528	8.59				0.887	1.025	0.823	1.071	1.03	0.856	0.652	1.061		1032.3	829.6	915.6	1058.3	632	849.4	1105.6	1028.3	1063.5	969.5
P06800	Ptprc	PE	Receptor-type tyrosine-protein phosphatase C OS=Mus musculus GN=Ptprc PE=1 SV=3	9.45004	13	19	13	1291	144.514	5.94				1.279	1.182	1.209	0.964	2.267	0.835	0.582	0.616		710.5	831.4	909	839.7	579.1	859.1	684.6	613.4	1610.6	995.7
P12970	Rpl7a	PE	60S ribosomal protein L7a OS=Mus musculus GN=Rpl7a PE=1 SV=2	29.6992	10	12	10	266	29.958	10.56				1.135	0.899	1.062	0.859	1.053	0.96	1.051	0.806		797.1	723.8	904.5	716.2	792.5	846.1	684.5	607.4	838.9	753.7
Q91VD9	Ndufs1	PE	NADH-ubiquinone oxidoreductase 75 kDa subunit, mitochondrial OS=Mus musculus GN=Ndufs1 PE=1 SV=2	19.2572	14	16	14	727	79.726	5.72				1.009	1.053	1.024	1.153	1.225	0.863	0.633	0.91		896.3	830.4	904.4	944.1	609.1	917.7	1033.6	875.5	1098	962.1
P62301	Rps13	PE	40S ribosomal protein S13 OS=Mus musculus GN=Rps13 PE=1 SV=2	56.9536	10	25	10	151	17.212	10.54				1.284	1.342	1.506	1.362	1.258	1.076	5.437	1.237		701.5	766	900.7	941.3	3871.5	1056.2	955.3	880.5	882.5	712
P05064	Aldoa	PE	Fructose-bisphosphate aldolase A OS=Mus musculus GN=Aldoa PE=1 SV=2	35.7143	12	16	12	364	39.331	8.09				1.393	1.199	1.775	1.749	2.645	0.922	0.603	0.528		641.6	970.8	893.5	769.1	634.7	1138.9	1121.9	556.4	1697.1	1053
Q9R1P4	Psma1	PE	Proteasome subunit alpha type-1 OS=Mus musculus GN=Psma1 PE=1 SV=1	34.981	10	14	10	263	29.528	6.46				0.927	0.723	0.964	0.76	1.371	0.961	0.582	0.834		957.9	925	887.7	692.8	560.5	923.3	728.2	803.1	1313.4	962.9
Q8BH59	Slc25a12	PE	Calcium-binding mitochondrial carrier protein Aralar1 OS=Mus musculus GN=Slc25a12 PE=1 SV=1	30.5761	16	19	16	677	74.523	8.25				0.967	1.054	1.151	1.097	1.299	0.993	1.296	0.968		917.1	948	886.9	966.2	1237	1055.7	1005.9	923.2	1191	954.2
Q9CZX8	Rps19	PE	40S ribosomal protein S19 OS=Mus musculus GN=Rps19 PE=1 SV=3	63.4483	14	87	14	145	16.076	10.4				0.77	0.655	1.174	1.653	1.012	0.798	16.055	0.78		1141.7	1123.9	878.9	748.4	22613.3	1340.8	1887.7	1098.8	1155.5	1408.5
P80313	Cct7	PE	T-complex protein 1 subunit eta OS=Mus musculus GN=Cct7 PE=1 SV=1	30.3309	14	20	14	544	59.614	7.84				1.135	0.991	1.068	1.125	1.56	0.912	0.671	0.884		773.6	779.6	878.3	766.6	573.9	826.1	870.6	755.4	1206.7	854.8
P67778	Phb	PE	Prohibitin OS=Mus musculus GN=Phb PE=1 SV=1	51.4706	11	14	11	272	29.802	5.76				0.785	0.829	0.878	0.719	0.751	0.857	0.845	0.583		1118	854.6	877.3	927.2	842.5	981.2	803.7	581.8	840	997.2
Q9DCW4	Etfb	PE	Electron transfer flavoprotein subunit beta OS=Mus musculus GN=Etfb PE=1 SV=3	39.2157	9	13	9	255	27.606	8.1				0.857	1.632	1.099	1.322	1.131	0.992	0.975	1.041		1020.4	959.9	874.3	1665.7	942.8	1121.7	1349.3	1006.8	1154.1	967.5
Q9D0T1	Snu13	PE	NHP2-like protein 1 OS=Mus musculus GN=Snu13 PE=1 SV=4	39.8438	6	9	6	128	14.165	8.46				1.319	0.978	1.324	1.157	1.065	1.173	1.66	0.842		661.8	790.6	872.8	647.1	1119.3	876.1	765.6	567.5	704.9	674.1
P17225	Ptbp1	PE	Polypyrimidine tract-binding protein 1 OS=Mus musculus GN=Ptbp1 PE=1 SV=2	23.1499	8	16	5	527	56.443	8.34				1.523	1.257	1.655	1.309	2.661	0.884	0.765	0.555		558	793.1	849.8	701.5	686	923.6	730.4	497.9	1484.8	896.9
Q9Z2U0	Psma7	PE	Proteasome subunit alpha type-7 OS=Mus musculus GN=Psma7 PE=1 SV=1	38.7097	9	13	9	248	27.838	8.46				0.98	0.898	1.032	0.96	1.407	1.017	0.739	0.922		862.5	871.1	845.3	774.5	633	890.4	828	789.9	1213.3	856.4
P62274	Rps29	PE	40S ribosomal protein S29 OS=Mus musculus GN=Rps29 PE=3 SV=2	60.7143	5	21	5	56	6.672	10.13				0.722	1.327	0.9	1.431	0.706	0.911	2.252	1.239		1169.7	857.9	844.6	1552.7	2120.9	1052.8	1673.5	1167.4	825.3	941.8
Q9EPL8	Ipo7	PE	Importin-7 OS=Mus musculus GN=Ipo7 PE=1 SV=2	11.7534	12	16	12	1038	119.41	4.82				0.877	1.339	1.331	0.657	0.563	0.995	0.72	0.576		962.9	944.1	844.1	1289.3	682.8	1281.2	632.2	546.6	542	948.9
P38060	Hmgcl	PE	Hydroxymethylglutaryl-CoA lyase, mitochondrial OS=Mus musculus GN=Hmgcl PE=1 SV=2	34.1538	11	18	11	325	34.217	8.41				0.732	1.179	0.849	1.214	0.839	0.8	0.646	1.017		1149.2	840.1	841.1	1355	678.6	975.2	1395.6	1067.9	964.4	1050.4
Q9DB20	Atp5o	PE	ATP synthase subunit O, mitochondrial OS=Mus musculus GN=Atp5o PE=1 SV=1	50.2347	11	22	11	213	23.349	9.99				1.109	1.518	1.666	1.746	1.777	1.12	4.584	1.068		752.8	987.5	835	1143	4041.4	1253.8	1314.1	941.5	1337.6	881.7
Q3UEB3	Puf60	PE	Poly(U)-binding-splicing factor PUF60 OS=Mus musculus GN=Puf60 PE=1 SV=2	23.227	12	15	12	564	60.211	5.29				1	0.948	0.939	1.131	1.125	0.622	0.55	0.635		833.3	740.7	832.9	790.3	655.1	782.6	942.6	757.2	937.8	1191.6
Q9JHJ0	Tmod3	PE	Tropomodulin-3 OS=Mus musculus GN=Tmod3 PE=1 SV=1	25.5682	8	11	8	352	39.478	5.14				0.605	0.625	0.538	0.443	0.475	0.689	0.646	0.559		1373.7	840.1	831.5	858.4	787.2	739.3	608.6	681	652.5	1218.7
P62918	Rpl8	PE	60S ribosomal protein L8 OS=Mus musculus GN=Rpl8 PE=1 SV=2	28.0156	8	11	8	257	28.007	11.03				1.489	1.174	1.524	0.811	1.528	1.178	1.77	1.082		556.5	608.5	828.6	653.4	914	847.8	451.4	558.9	850.2	516.5
Q6PDQ2	Chd4	PE	Chromodomain-helicase-DNA-binding protein 4 OS=Mus musculus GN=Chd4 PE=1 SV=1	7.15405	14	19	9	1915	217.614	5.81				0.911	1.157	0.882	0.994	1.169	0.9	0.787	1.074		909.4	745.1	828.3	1052.2	651.9	801.8	903.7	889.8	1063	828.2
P14148	Rpl7	PE	60S ribosomal protein L7 OS=Mus musculus GN=Rpl7 PE=1 SV=2	24.8148	7	9	7	270	31.4	10.89				1.528	1.196	1.574	1.064	1.777	0.899	1.032	0.863		536.9	635.3	820.4	642	729.1	845.1	571.2	610	954.1	706.7
Q922B2	Dars	PE	Aspartate--tRNA ligase, cytoplasmic OS=Mus musculus GN=Dars PE=1 SV=2	25.7485	12	13	12	501	57.111	6.49				1.071	0.992	1.19	0.97	1.947	0.894	0.714	0.809		765.1	827.1	819.3	759.1	661	910.7	742.3	749	1489.8	925.4
P97350	Pkp1	PE	Plakophilin-1 OS=Mus musculus GN=Pkp1 PE=1 SV=1	10.0275	7	10	7	728	80.844	8.91				2.042	0.971	1.23	1.09	0.599	1.272	0.476	0.636		400	757.4	817	388.5	283.3	492	436	379	239.6	595.6
Q9JKF1	Iqgap1	PE	Ras GTPase-activating-like protein IQGAP1 OS=Mus musculus GN=Iqgap1 PE=1 SV=2	9.59565	13	14	13	1657	188.624	6.48				1.28	1.07	1.261	1.275	2.093	0.876	0.901	0.749		637	678	815.4	681.8	697.6	803.4	812	579.7	1332.9	773.9
O08553	Dpysl2	PE	Dihydropyrimidinase-related protein 2 OS=Mus musculus GN=Dpysl2 PE=1 SV=2	24.4755	12	17	11	572	62.239	6.38				1.189	1.058	1.235	1.073	1.606	1.036	1.007	0.797		685.5	818.8	814.7	725	795.3	846.9	735.8	629.8	1100.7	790
P43274	Hist1h1e	PE	Histone H1.4 OS=Mus musculus GN=Hist1h1e PE=1 SV=2	40.1826	13	52	5	219	21.964	11.11				1.561	0.944	1.393	1.413	0.84	0.547	2.15	0.804		521.3	379.5	813.7	492	1490.4	726.1	736.7	557.2	438	693.3
P26040	Ezr	PE	Ezrin OS=Mus musculus GN=Ezr PE=1 SV=3	32.0819	22	39	11	586	69.364	6.1				1.161	1.013	1.216	0.981	1.822	0.86	0.75	0.612		697.9	779.4	810	706.7	680	848.9	684.8	554.8	1271.6	906.1
Q91ZW3	Smarca5	PE	SWI/SNF-related matrix-associated actin-dependent regulator of chromatin subfamily A member 5 OS=Mus musculus GN=Smarca5 PE=1 SV=1	12.9401	16	16	16	1051	121.55	8.15				0.862	1.235	0.986	1.328	1.116	0.887	1.101	1.27		937.7	743.8	808.4	1158.4	922.8	924.1	1245	1064.9	1046	838.3
P43404	Zap70	PE	Tyrosine-protein kinase ZAP-70 OS=Mus musculus GN=Zap70 PE=1 SV=3	17.1521	11	13	11	618	70.066	7.83				0.893	0.968	0.79	1.046	0.912	0.996	0.682	1.028		903.8	829.1	807.3	874.6	567.7	714.2	945.5	856.2	824.6	832.7
Q8BKZ9	Pdhx	PE	Pyruvate dehydrogenase protein X component, mitochondrial OS=Mus musculus GN=Pdhx PE=1 SV=1	27.1457	11	21	11	501	53.965	7.75				0.445	1.114	0.466	1.249	0.336	0.495	0.432	0.646		1807.6	570.8	804.4	2013.1	498.6	841.5	2257.9	745.1	606.9	1153.8
Q6P3A8	Bckdhb	PE	2-oxoisovalerate dehydrogenase subunit beta, mitochondrial OS=Mus musculus GN=Bckdhb PE=1 SV=2	28.7179	8	20	8	390	42.853	6.7				0.743	1.282	0.976	1.242	1.102	0.835	0.841	1.88		1080.8	718.7	802.8	1385.8	723.9	1055.2	1342.2	1618.1	1191.1	860.8
Q9R1P0	Psma4	PE	Proteasome subunit alpha type-4 OS=Mus musculus GN=Psma4 PE=1 SV=1	30.2682	9	11	9	261	29.452	7.72				1.092	0.945	1.286	0.926	1.495	0.864	0.839	0.829		731	766.2	798.1	691.1	744.3	940.4	677.3	735.2	1092.6	886.7
Q8K4G5	Ablim1	PE	Actin-binding LIM protein 1 OS=Mus musculus GN=Ablim1 PE=1 SV=1	6.62021	6	7	6	861	96.743	8.63				0.946	0.762	0.823	0.728	0.684	0.787	1.085	0.759		838.5	697.5	793.1	639.1	961.6	689.9	610.4	672.7	573.7	886.3
P48962	Slc25a4	PE	ADP/ATP translocase 1 OS=Mus musculus GN=Slc25a4 PE=1 SV=4	61.4094	18	71	8	298	32.883	9.72				0.806	1.327	1.185	0.75	0.688	0.985	1.983	0.704		983.2	933.2	792.3	1305.1	1879.5	1165.1	737.8	667.2	676.2	947.6
Q6PIJ4	Nfrkb	PE	Nuclear factor related to kappa-B-binding protein OS=Mus musculus GN=Nfrkb PE=1 SV=1	9.10494	10	12	10	1296	138.678	9.22				1.097	0.928	0.887	1.129	1.147	1.083	0.777	1.494		719.5	664	789.1	667.4	476.7	637.9	812.3	915.8	825.3	613.1
A0A0N4SVP8	Gm5580	PE	Predicted pseudogene 5580 OS=Mus musculus GN=Gm5580 PE=3 SV=1	24.5742	10	12	9	411	46.929	7.75				1.23	1.225	1.209	1.37	1.451	0.906	1.077	0.978		638.4	621.9	785.1	781.8	739.5	771.8	874.9	671.5	926.6	686.5
Q9JJI8	Rpl38	PE	60S ribosomal protein L38 OS=Mus musculus GN=Rpl38 PE=1 SV=3	51.4286	5	22	5	70	8.199	10.1				0.841	1.064	0.903	1.96	0.899	0.588	3.126	0.979		930.5	621	782.6	989.9	3300.9	839.8	1823.3	1034.1	836.1	1055.9
Q8BP67	Rpl24	PE	60S ribosomal protein L24 OS=Mus musculus GN=Rpl24 PE=1 SV=2	42.0382	8	14	8	157	17.768	11.25				1.573	1.422	1.866	0.963	1.686	1.247	2.851	1.343		497	567	781.9	706.8	1296.5	927.4	478.4	610.7	838	454.7
Q9CQI6	Cotl1	PE	Coactosin-like protein OS=Mus musculus GN=Cotl1 PE=1 SV=3	39.4366	8	14	8	142	15.934	5.4				1.5	1.356	1.763	0.635	3.543	0.97	0.49	0.38		519.2	1022.8	779	704.1	516.4	915.6	329.8	400.7	1839.4	1054.9
Q91VN6	Ddx41	PE	Probable ATP-dependent RNA helicase DDX41 OS=Mus musculus GN=Ddx41 PE=1 SV=2	18.1672	12	13	12	622	69.775	6.7				0.934	1.035	0.793	1.038	0.701	0.773	0.931	0.793		832.8	647.1	777.9	861.6	780	660.2	864.1	664	584.2	837.4
Q9D2G2	Dlst	PE	Dihydrolipoyllysine-residue succinyltransferase component of 2-oxoglutarate dehydrogenase complex, mitochondrial OS=Mus musculus GN=Dlst PE=1 SV=1	20.0441	8	14	8	454	48.963	8.95				0.83	1.158	0.918	1.189	0.991	0.812	0.772	1.188		933.7	630.5	775.3	1081.6	598.9	857.5	1110.1	922.3	925.1	776.2
Q9CVB6	Arpc2	PE	Actin-related protein 2/3 complex subunit 2 OS=Mus musculus GN=Arpc2 PE=1 SV=3	25.3333	9	12	9	300	34.336	7.36				1	0.748	0.992	0.863	1.18	0.883	0.695	0.681		774.7	705.3	774.4	579.6	555	768.3	668.3	543.9	913.8	799
P15864	Hist1h1c	PE	Histone H1.2 OS=Mus musculus GN=Hist1h1c PE=1 SV=2	41.9811	13	70	3	212	21.254	11				1.168	1.025	1.384	1.617	0.82	0.444	3.088	0.855		662.6	374.5	774.1	679.3	2603.5	917.3	1071.7	720.9	543.3	843.2
Q61033	Tmpo	PE	Lamina-associated polypeptide 2, isoforms alpha/zeta OS=Mus musculus GN=Tmpo PE=1 SV=4	18.1818	9	19	9	693	75.122	8.05				1.011	1.061	0.898	1.134	1.205	0.795	0.711	0.773		764.6	749.5	772.9	811.3	669.7	686.6	866.7	728.4	921.6	942.4
P17751	Tpi1	PE	Triosephosphate isomerase OS=Mus musculus GN=Tpi1 PE=1 SV=4	34.4482	10	16	10	299	32.171	5.74				1.182	1.217	2.169	1.115	2.159	1.26	1.099	0.691		653.2	1039.4	772.3	795	906.8	1416.9	728.3	570.3	1409.9	825
P06332	Cd4	PE	T-cell surface glycoprotein CD4 OS=Mus musculus GN=Cd4 PE=1 SV=1	10.0656	6	8	6	457	51.264	9.16				1.025	0.729	0.711	0.619	0.987	0.944	0.565	0.848		752.1	566.2	771	548.5	339.2	534.6	465.8	508.5	742.5	599.9
Q64012	Raly	PE	RNA-binding protein Raly OS=Mus musculus GN=Raly PE=1 SV=3	23.0769	8	9	8	312	33.168	8.84				1.587	1.428	2.964	1.633	1.202	0.683	1.593	1.083		482.8	387.9	766.4	689.3	904	1431	788.3	614.8	580.3	567.6
E9Q7G0	Numa1	PE	Nuclear mitotic apparatus protein 1 OS=Mus musculus GN=Numa1 PE=1 SV=1	8.07068	15	17	15	2094	235.487	5.87				1.111	0.971	1.418	1.234	1.104	0.879	1.398	1.338		689.7	643.8	766.2	670	1023.6	978	851.2	979.7	761.7	732.3
E9Q3G8	Nup153	PE	Nucleoporin 153 OS=Mus musculus GN=Nup153 PE=1 SV=1	12.1067	15	16	15	1462	151.914	8.84				0.833	0.952	0.851	1.216	1.004	0.643	1.536	0.941		918.9	628.2	765.1	875.2	1501.1	782	1117.5	919.7	922.5	977.5
Q569Z5	Ddx46	PE	Probable ATP-dependent RNA helicase DDX46 OS=Mus musculus GN=Ddx46 PE=1 SV=2	8.81783	10	10	10	1032	117.376	9.26				0.795	1.142	0.854	1.129	0.787	0.997	0.534	1.159		957.1	895.4	761.4	1093.2	479.4	817.8	1080.5	1041.4	753.6	898.2
Q9CR57	Rpl14	PE	60S ribosomal protein L14 OS=Mus musculus GN=Rpl14 PE=1 SV=3	19.8157	4	11	4	217	23.549	11.02				1.515	1.328	1.615	0.81	1.881	1.25	1.392	1.156		501	628	759.1	665.5	699.4	809.3	406	580.9	942.2	502.6
Q99020	Hnrnpab	PE	Heterogeneous nuclear ribonucleoprotein A/B OS=Mus musculus GN=Hnrnpab PE=1 SV=1	32.6316	9	14	8	285	30.812	7.91				1.803	1.239	2.273	1.239	2.516	0.479	0.703	0.289		420.6	561.5	758.3	521	824.5	956.1	521.2	338.9	1058.1	1172.3
P62827	Ran	PE	GTP-binding nuclear protein Ran OS=Mus musculus GN=Ran PE=1 SV=3	33.7963	7	11	7	216	24.408	7.49				1.029	1.148	1.137	1.117	1.441	0.96	0.659	0.68		735.7	803.9	757.4	844.5	551.6	836.8	822.2	569.1	1060.5	837.4
P80318	Cct3	PE	T-complex protein 1 subunit gamma OS=Mus musculus GN=Cct3 PE=1 SV=1	24.9541	13	17	13	545	60.591	6.7				1.08	1.136	1.088	1.06	1.394	0.959	0.819	0.875		698.3	730.9	754.3	793.2	624	759.4	740.5	666.9	973.1	761.8
Q9Z2X1	Hnrnpf	PE	Heterogeneous nuclear ribonucleoprotein F OS=Mus musculus GN=Hnrnpf PE=1 SV=3	25.3012	8	18	6	415	45.701	5.49				1.225	1.015	1.21	0.955	1.612	1.113	0.963	0.772		609.3	874.2	746.1	618.1	756.3	737.1	581.9	606.7	982	785.4
P06745	Gpi	PE	Glucose-6-phosphate isomerase OS=Mus musculus GN=Gpi PE=1 SV=4	18.1004	10	15	10	558	62.727	8.13				1.247	1.017	1.422	0.742	2.473	0.955	0.596	0.552		597.6	784.2	745.4	607.5	488.9	849.9	443.6	453	1478	820.9
ENSEMBL:ENSBTAP00000007350			(Bos taurus) similar to Complement C4-A precursor	0.97589	2	4	3	1742	192.871	7.44		Y	Y	1.931	1.19	1.997	1.1	2.044	2.59	1.803	3.16		383.3	798.6	740	456.2	556	765.5	421.8	974.1	783.3	308.3
P60335	Pcbp1	PE	Poly(rC)-binding protein 1 OS=Mus musculus GN=Pcbp1 PE=1 SV=1	38.4831	11	15	8	356	37.474	7.09				1.232	0.927	1.293	1.008	2.015	1.085	0.947	0.815		600.3	701.6	739.6	556.4	612.3	776.1	605	527.2	1209.4	646.7
Q99K48	Nono	PE	Non-POU domain-containing octamer-binding protein OS=Mus musculus GN=Nono PE=1 SV=3	36.7865	17	25	13	473	54.506	8.95				0.933	0.771	0.883	0.924	1.092	0.669	1.038	0.64		791.5	727.2	738.1	610	1128.2	699.2	731.4	695.5	864.3	1087.2
Q80YV3	Trrap	PE	Transformation/transcription domain-associated protein OS=Mus musculus GN=Trrap PE=1 SV=2	7.64133	20	22	20	2565	291.37	8.48				0.788	1.1	0.886	0.997	0.943	0.855	0.921	1.106		932.2	676.6	734.9	1025.8	728.6	825.8	929.1	875.1	879.1	791.4
P28474	Adh5	PE	Alcohol dehydrogenase class-3 OS=Mus musculus GN=Adh5 PE=1 SV=3	12.5668	6	8	6	374	39.522	7.25				1.467	1.39	1.605	1.089	2.904	1.012	0.579	0.585		498.2	833.1	731	692.4	477.1	799.3	542.7	481.5	1446.6	823.5
Q9CQV8	Ywhab	PE	14-3-3 protein beta/alpha OS=Mus musculus GN=Ywhab PE=1 SV=3	34.9593	10	25	3	246	28.069	4.83				1.387	1.129	1.516	1.066	2.288	1.116	0.875	0.733		525.7	808.2	729.1	593.7	633.9	797.2	560.4	531.1	1202.7	724.2
Q8BSM5	Gab3	PE	GRB2-associated-binding protein 3 OS=Mus musculus GN=Gab3 PE=1 SV=1	11.0924	7	7	7	595	67.798	6.83				2.533	0.925	2.14	0.788	2.656	0.736	0.735	0.843		286.9	200.5	726.8	265.4	200.2	614.1	226.2	229.7	762.1	272.5
Q75N62	Gimap8	PE	GTPase IMAP family member 8 OS=Mus musculus GN=Gimap8 PE=1 SV=1	10.9012	8	11	7	688	76.795	7.27				0.947	0.981	0.819	1.037	1.036	0.974	0.653	1.046		766.2	694.2	725.6	751.7	465.1	627.2	794.7	745.7	794	712.6
Q8CGC7	Eprs	PE	Bifunctional glutamate/proline--tRNA ligase OS=Mus musculus GN=Eprs PE=1 SV=4	6.41534	10	11	10	1512	169.972	7.66				1.022	0.863	0.989	0.903	1.503	0.853	0.682	0.837		709.4	589.7	724.7	612	471.2	701.8	640.3	578.6	1066.1	691.2
P21619	Lmnb2	PE	Lamin-B2 OS=Mus musculus GN=Lmnb2 PE=1 SV=2	34.7315	23	34	17	596	67.277	5.5				0.794	0.912	1.02	1.125	1.302	0.699	1.076	1.32		910.1	643.3	722.9	829.9	990.5	928.6	1023.9	1215.9	1184.5	920.8
Q99KE1	Me2	PE	NAD-dependent malic enzyme, mitochondrial OS=Mus musculus GN=Me2 PE=1 SV=1	20.7131	11	14	11	589	65.757	7.61				0.958	1.481	1.098	1.058	1.232	0.908	0.771	0.996		752.3	731.4	720.5	1114.3	621.6	826.3	795.8	802.8	926.8	805.7
P08752	Gnai2	PE	Guanine nucleotide-binding protein G(i) subunit alpha-2 OS=Mus musculus GN=Gnai2 PE=1 SV=5	28.7324	9	13	8	355	40.463	5.45				1.136	1.303	1.28	1.458	1.268	0.791	0.739	0.647		633.8	675.5	720.1	826	631.2	811.2	924.3	553.2	803.7	854.5
P35979	Rpl12	PE	60S ribosomal protein L12 OS=Mus musculus GN=Rpl12 PE=1 SV=2	42.4242	6	8	6	165	17.794	9.42				1.471	1.039	1.513	1.101	1.189	0.972	1.247	0.723		489.1	516.6	719.5	508.4	662.5	740	538.7	384.2	581.6	531.4
Q9D8N0	Eef1g	PE	Elongation factor 1-gamma OS=Mus musculus GN=Eef1g PE=1 SV=3	20.3661	9	9	9	437	50.029	6.74				1.198	1.013	1.435	0.969	1.775	0.92	0.687	0.659		596.1	670.1	714	604	500.5	855.2	577.4	479.6	1057.8	728.1
Q8CIE6	Copa	PE	Coatomer subunit alpha OS=Mus musculus GN=Copa PE=1 SV=2	8.90523	13	15	13	1224	138.344	7.65				0.999	1.106	1.036	1.128	1.575	0.886	0.685	0.871		713.9	700	713.5	789.3	541.1	739.5	805.3	688.4	1124.2	790.1
Q9D6Z1	Nop56	PE	Nucleolar protein 56 OS=Mus musculus GN=Nop56 PE=1 SV=2	28.7931	14	20	14	580	64.424	9.14				1.108	1.066	1.127	1.228	1.227	1.064	2.217	1.117		638.2	644.1	707.5	680.1	1341.8	719.4	784	676.3	783.2	605.3
Q9D8E6	Rpl4	PE	60S ribosomal protein L4 OS=Mus musculus GN=Rpl4 PE=1 SV=3	27.2076	11	15	11	419	47.124	11				1.235	1.113	1.229	0.882	1.374	1.025	1.005	0.895		571.3	611.8	705.4	635.9	599.9	702.1	503.7	534.1	785.1	597.1
Q8BJY1	Psmd5	PE	26S proteasome non-ATPase regulatory subunit 5 OS=Mus musculus GN=Psmd5 PE=1 SV=4	33.7302	13	15	13	504	55.937	5.21				0.847	1.101	1.151	0.601	0.673	0.839	0.627	0.482		823.9	813.7	697.4	907.1	608.3	948.1	495.5	467.1	554.5	970
Q99KI0	Aco2	PE	Aconitate hydratase, mitochondrial OS=Mus musculus GN=Aco2 PE=1 SV=1	17.5641	12	12	12	780	85.41	7.93				1.066	1.188	1.238	0.908	1.847	0.831	0.717	0.744		651.3	663.6	694	773.6	572.5	806.4	591.4	593.6	1202.8	798.3
Q60864	Stip1	PE	Stress-induced-phosphoprotein 1 OS=Mus musculus GN=Stip1 PE=1 SV=1	14.9171	8	9	8	543	62.542	6.8				1.478	1.155	1.601	1.052	2.417	1.127	0.796	0.882		465.3	711	687.9	537.4	502.2	744.8	489.6	556.1	1124.5	630.7
Q8R081	Hnrnpl	PE	Heterogeneous nuclear ribonucleoprotein L OS=Mus musculus GN=Hnrnpl PE=1 SV=2	23.2082	10	15	10	586	63.923	8.1				1.272	1.029	1.441	1.166	1.878	0.948	1.194	0.818		540.6	564.2	687.7	556.5	710.4	779.3	630.6	486.7	1015.2	595
Q60972	Rbbp4	PE	Histone-binding protein RBBP4 OS=Mus musculus GN=Rbbp4 PE=1 SV=5	13.1765	6	8	6	425	47.626	4.89				0.946	1.037	0.975	1.208	1.134	0.868	0.756	0.974		723.6	634.7	684.2	750.4	553	705.4	874.2	712.3	820.3	731.6
P49710	Hcls1	PE	Hematopoietic lineage cell-specific protein OS=Mus musculus GN=Hcls1 PE=1 SV=2	14.1975	7	12	7	486	54.207	4.84				1.066	0.942	0.974	0.974	1.217	1.009	0.664	0.883		639.2	706.5	681.5	601.9	465.2	622.4	622.9	617.9	778	700.1
O70435	Psma3	PE	Proteasome subunit alpha type-3 OS=Mus musculus GN=Psma3 PE=1 SV=3	35.2941	9	10	9	255	28.387	5.44				1.014	0.73	1.056	0.801	1.279	0.946	0.63	0.814		671	709	680.2	489.7	472.2	708.7	537.7	610	858.4	749.7
P63163	Snrpn	PE	Small nuclear ribonucleoprotein-associated protein N OS=Mus musculus GN=Snrpn PE=1 SV=1	17.9167	5	10	5	240	24.598	11.19				1.043	0.953	1.14	1.203	1.25	0.869	1.129	0.931		650.4	600.4	678.3	619.7	780.7	741.2	782.6	643.6	813.1	691.3
Q99KG3	Rbm10	PE	RNA-binding protein 10 OS=Mus musculus GN=Rbm10 PE=1 SV=1	10.9677	11	11	11	930	103.43	5.92				0.882	1.007	0.754	1.249	0.803	0.859	0.705	1.075		769	593.4	678.2	774.5	487.4	579.9	960.5	742.9	617.4	690.9
Q9QUM9	Psma6	PE	Proteasome subunit alpha type-6 OS=Mus musculus GN=Psma6 PE=1 SV=1	29.6748	7	11	7	246	27.355	6.76				1.043	0.962	1.141	0.888	1.474	0.937	0.69	0.797		649.6	671.5	677.3	625.2	494.5	741.4	576.7	571.2	957.5	716.3
P63325	Rps10	PE	40S ribosomal protein S10 OS=Mus musculus GN=Rps10 PE=1 SV=1	56.3636	14	42	13	165	18.904	10.15				0.828	0.796	1.132	1.195	1.036	0.921	10.167	0.985		817.7	802.9	677	650.7	8863.5	925.4	977.4	858.9	847.3	871.8
P63158	Hmgb1	PE	High mobility group protein B1 OS=Mus musculus GN=Hmgb1 PE=1 SV=2	36.2791	7	17	5	215	24.878	5.74				1.524	1.265	1.954	1.091	3.364	1.268	0.9	0.595		442.7	922.7	674.7	560.2	654.9	865	483.1	433.2	1489.5	727.6
Q9WV02	Rbmx	PE	RNA-binding motif protein, X chromosome OS=Mus musculus GN=Rbmx PE=1 SV=1	30.6905	14	16	1	391	42.275	10.05				1.079	1.135	1.352	1.512	1.019	0.612	2.365	0.823		625.2	441.2	674.5	709.6	1705.2	845.5	945.1	593.4	637.3	721
Q4FZC9	Syne3	PE	Nesprin-3 OS=Mus musculus GN=Syne3 PE=1 SV=1	13.5385	12	13	12	975	111.966	6.33				0.719	1.063	0.988	0.628	0.573	0.888	0.864	1.139		937.2	724.9	673.9	995.9	705	926.4	588.8	929.3	536.9	816.1
Q9WVA4	Tagln2	PE	Transgelin-2 OS=Mus musculus GN=Tagln2 PE=1 SV=4	54.2714	9	15	9	199	22.381	8.24				1.281	1.044	1.47	1.03	1.887	1.019	0.572	0.67		524.4	688.7	671.9	547.3	386.5	770.7	540.2	453	989.6	675.8
Q9QVP9	Ptk2b	PE	Protein-tyrosine kinase 2-beta OS=Mus musculus GN=Ptk2b PE=1 SV=2	7.4331	8	8	8	1009	115.72	6.35				0.923	1.058	0.93	1.036	1.034	0.743	0.591	0.866		726.6	615.3	670.8	768.5	489.3	675.7	752.6	716.9	751.2	828.2
Q9QZQ8	H2afy	PE	Core histone macro-H2A.1 OS=Mus musculus GN=H2afy PE=1 SV=3	27.1505	10	29	10	372	39.71	9.8				0.682	0.98	1.489	1.65	0.678	0.386	2.536	0.927		979.6	490.2	667.9	959.7	3220.9	1458.3	1616.2	1177	663.9	1270.1
Q99PT1	Arhgdia	PE	Rho GDP-dissociation inhibitor 1 OS=Mus musculus GN=Arhgdia PE=1 SV=3	39.7059	7	10	7	204	23.393	5.2				1.422	1.022	1.43	0.778	2.804	1.034	0.582	0.553		468.4	729.8	666.2	478.5	411.1	669.8	364.6	390.3	1313.5	705.9
Q9WV85	Nme3	PE	Nucleoside diphosphate kinase 3 OS=Mus musculus GN=Nme3 PE=1 SV=3	35.503	5	12	5	169	19.087	6.68				1.17	0.987	1.572	0.681	0.79	1.183	0.913	1.085		568.4	632.1	665	560.9	488	893.5	387.2	580	449.2	534.4
P47941	Crkl	PE	Crk-like protein OS=Mus musculus GN=Crkl PE=1 SV=2	24.0924	7	14	7	303	33.809	6.74				1.339	1.028	1.314	1.109	1.354	1.203	0.874	1.487		495.7	605.9	663.8	509.4	440.2	651.2	549.5	748.8	671.3	503.5
Q91VK1	Bzw2	PE	Basic leucine zipper and W2 domain-containing protein 2 OS=Mus musculus GN=Bzw2 PE=1 SV=1	24.3437	11	14	10	419	48.033	6.68				0.699	1.277	1.113	0.569	0.583	0.978	0.675	0.569		945	850.7	660.3	1207	587.5	1052.1	537.7	495.1	551.2	870.1
P63276	Rps17	PE	40S ribosomal protein S17 OS=Mus musculus GN=Rps17 PE=1 SV=2	56.2963	6	18	6	135	15.514	9.85				1.145	1.086	1.096	1.908	1.219	1.105	4.323	1.475		576.2	637.1	659.6	625.5	2492.9	631.5	1099.4	850.5	702.3	576.7
Q8BH58	Tiprl	PE	TIP41-like protein OS=Mus musculus GN=Tiprl PE=1 SV=1	28.4133	7	9	7	271	31.234	5.63				0.974	0.992	0.917	1.254	0.975	0.935	0.751	1.135		676.6	617.3	658.8	671.4	495.7	620.6	848.5	749.8	660	660.3
Q9WUM3	Coro1b	PE	Coronin-1B OS=Mus musculus GN=Coro1b PE=1 SV=1	10.5372	6	11	6	484	53.878	5.78				0.917	1.064	0.796	1.088	0.989	0.822	0.548	0.865		714.5	609.7	655.3	760	406.1	568.5	777.5	641.9	706.5	741.6
P43275	Hist1h1a	PE	Histone H1.1 OS=Mus musculus GN=Hist1h1a PE=1 SV=2	26.7606	8	23	5	213	21.772	10.93				1.171	0.781	1.172	0.992	0.8	0.638	4.129	0.985		554.1	308.2	649.2	433	1994.3	649.4	549.5	475.7	443.5	483
Q7TSF1	Dsg1b	PE	Desmoglein-1-beta OS=Mus musculus GN=Dsg1b PE=1 SV=1	2.54717	3	8	3	1060	114.382	4.84				1.384	0.848	1.081	0.878	0.625	1.402	0.931	0.795		468.7	784.4	648.7	397.6	520.6	506.6	411.4	444.5	293.2	559.3
P51410	Rpl9	PE	60S ribosomal protein L9 OS=Mus musculus GN=Rpl9 PE=2 SV=2	55.2083	10	22	10	192	21.868	9.95				0.92	1.146	1.116	1.389	1.073	1	8.704	1.119		704.9	686.2	648.4	807.7	5974.7	786.5	979.4	768.2	756.5	686.5
Q80WQ2	Vac14	PE	Protein VAC14 homolog OS=Mus musculus GN=Vac14 PE=1 SV=1	14.8338	11	12	11	782	87.992	6.13				0.7	1.072	1.488	0.681	0.559	0.926	0.711	0.65		922.9	787.2	646.1	989.6	604.1	1373.4	628.4	552.4	515.5	849.7
P22752	Hist1h2ab	PE	Histone H2A type 1 OS=Mus musculus GN=Hist1h2ab PE=1 SV=3	68.4615	10	111	2	130	14.127	11.05				0.622	1.133	1.965	4.033	0.639	0.243	3.366	1.06		1036.2	371.1	645	1174.1	5137.5	2036.5	4178.8	1617.4	661.8	1526.5
P43276	Hist1h1b	PE	Histone H1.5 OS=Mus musculus GN=Hist1h1b PE=1 SV=2	32.7354	10	25	6	223	22.562	10.92				1.407	1.156	1.522	1.733	0.864	0.596	1.944	0.8		457.7	340.5	643.8	529.2	1110.9	696.8	793.2	456.9	395.3	571.5
Q91V61	Sfxn3	PE	Sideroflexin-3 OS=Mus musculus GN=Sfxn3 PE=1 SV=1	39.8754	9	18	7	321	35.384	9.51				0.976	1.018	1.281	1.114	1.414	1.097	3.162	1.256		659	678.1	643.3	671.1	1954	843.9	734	776.4	932.1	618
P62754	Rps6	PE	40S ribosomal protein S6 OS=Mus musculus GN=Rps6 PE=1 SV=1	28.9157	9	11	9	249	28.663	10.84				0.7	0.724	0.823	0.504	0.716	1.157	3.033	1.181		919.2	575.1	643	666	1507.5	756.7	463.5	586.9	658.1	497
P29351	Ptpn6	PE	Tyrosine-protein phosphatase non-receptor type 6 OS=Mus musculus GN=Ptpn6 PE=1 SV=2	27.8992	15	15	15	595	67.517	7.81				1.201	1.13	1.277	0.937	2.017	0.976	0.695	0.671		534.5	728.9	642.2	603.8	519.2	682.7	500.9	500.8	1077.9	746.6
Q99J39	Mlycd	PE	Malonyl-CoA decarboxylase, mitochondrial OS=Mus musculus GN=Mlycd PE=1 SV=1	27.8455	11	19	11	492	54.701	8.94				0.758	1.261	0.802	1.546	0.862	0.767	0.664	1.13		846.1	602	641.8	1067.1	521.7	678.5	1308.1	887	729.6	785.2
Q9Z1Q5	Clic1	PE	Chloride intracellular channel protein 1 OS=Mus musculus GN=Clic1 PE=1 SV=3	36.0996	8	10	8	241	26.996	5.17				1.486	1.149	1.556	1.604	3.075	0.924	0.547	0.518		430.9	655.5	640.3	495.3	387.7	670.6	691.2	367.1	1324.7	709.1
Q91WJ8	Fubp1	PE	Far upstream element-binding protein 1 OS=Mus musculus GN=Fubp1 PE=1 SV=1	14.5929	10	12	7	651	68.497	7.93				1.339	1.036	1.353	0.795	2.408	0.934	0.602	0.568		477.2	621.2	639.1	494.6	400.6	645.9	379.3	377.6	1149.3	665.1
Q61316	Hspa4	PE	Heat shock 70 kDa protein 4 OS=Mus musculus GN=Hspa4 PE=1 SV=1	13.0797	11	13	11	841	94.073	5.24				1.472	1.114	1.633	0.83	2.839	0.908	0.687	0.532		432.3	618.3	636.4	481.7	467.4	706	358.7	362.1	1227.4	680.6
P23198	Cbx3	PE	Chromobox protein homolog 3 OS=Mus musculus GN=Cbx3 PE=1 SV=2	25.6831	4	6	3	183	20.842	5.22				1.218	1.104	1.563	1.757	1.986	0.686	1.014	0.521		521.9	619.8	635.6	576.2	915.2	815.4	917	470.2	1036.2	903
Q6PDG5	Smarcc2	PE	SWI/SNF complex subunit SMARCC2 OS=Mus musculus GN=Smarcc2 PE=1 SV=2	9.56307	10	12	10	1213	132.522	5.59				0.988	0.975	0.945	1.078	1.198	0.843	0.831	0.91		642.4	535.6	634.5	626.5	527.7	606.9	692.8	577.8	769.7	635.2
P35550	Fbl	PE	rRNA 2'-O-methyltransferase fibrillarin OS=Mus musculus GN=Fbl PE=1 SV=2	33.3333	11	18	10	327	34.286	10.24				1.043	1.109	0.938	1.208	1.055	0.934	2.55	1.067		604.4	558.4	630.3	670.2	1524.8	567	730.3	637.9	637.5	598
Q08093	Cnn2	PE	Calponin-2 OS=Mus musculus GN=Cnn2 PE=1 SV=1	20.6557	6	12	6	305	33.134	7.62				1.416	1.365	1.589	1.279	2.01	0.914	0.76	0.756		444.6	649.6	629.7	607	540.2	706.5	568.7	537.4	893.9	710.5
P62852	Rps25	PE	40S ribosomal protein S25 OS=Mus musculus GN=Rps25 PE=1 SV=1	29.6	5	20	5	125	13.734	10.11				0.933	1.767	1.375	1.889	1.425	1.072	4.828	1.908		674.6	632	629.5	1192	2845.3	927.8	1274.1	1124.2	961.4	589.3
Q61210	Arhgef1	PE	Rho guanine nucleotide exchange factor 1 OS=Mus musculus GN=Arhgef1 PE=1 SV=2	12.7174	11	12	11	920	102.741	5.6				1.013	1.075	1.018	0.862	1.627	0.963	0.754	0.891		621	673	629	667.8	526.9	632.2	535.4	622.8	1010.5	698.9
Q9CX34	Sugt1	PE	Protein SGT1 homolog OS=Mus musculus GN=Sugt1 PE=1 SV=3	18.1548	6	7	6	336	38.135	5.45				2.2	1.122	1.882	1.028	2.198	1.804	1.17	1.751		284.4	619.2	625.7	319.2	401.6	535.3	292.4	600.8	625.1	343.2
Q61171	Prdx2	PE	Peroxiredoxin-2 OS=Mus musculus GN=Prdx2 PE=1 SV=3	34.8485	6	8	6	198	21.765	5.41				1.154	0.739	1.208	0.739	1.604	0.915	0.491	0.466		540.4	700.4	623.8	399.5	375.5	653	399.2	356.5	866.9	765.3
Q61823	Pdcd4	PE	Programmed cell death protein 4 OS=Mus musculus GN=Pdcd4 PE=1 SV=1	22.6013	9	13	9	469	51.67	5.16				1.11	0.978	1.299	0.738	1.868	1.19	0.837	0.726		557.2	745.4	618.5	545.1	524.3	723.7	411.1	454.6	1041.1	626.3
Q8VDN2	Atp1a1	PE	Sodium/potassium-transporting ATPase subunit alpha-1 OS=Mus musculus GN=Atp1a1 PE=1 SV=1	13.2942	12	14	12	1023	112.91	5.45				1.464	1.117	1.503	0.976	2.629	0.971	0.679	0.654		421	586.1	616.3	470.2	410.4	632.5	410.8	394.8	1106.7	603.9
P61514	Rpl37a	PE	60S ribosomal protein L37a OS=Mus musculus GN=Rpl37a PE=1 SV=2	51.087	5	12	5	92	10.268	10.43				0.897	1.366	1.008	1.312	0.897	0.956	1.217	1.228		686.7	573.7	616.2	937.9	730.6	692	901	736.9	616.2	600.2
Q7TMK9	Syncrip	PE	Heterogeneous nuclear ribonucleoprotein Q OS=Mus musculus GN=Syncrip PE=1 SV=2	10.5939	7	10	2	623	69.59	8.59				1.17	1.46	1.517	1.359	1.723	1.034	2.493	0.835		525	618.1	614.3	766.2	1490.5	796.4	713.2	499.4	904.4	597.9
P61161	Actr2	PE	Actin-related protein 2 OS=Mus musculus GN=Actr2 PE=1 SV=1	21.8274	7	11	8	394	44.732	6.74				1.102	0.937	1.334	0.968	1.335	0.795	0.754	0.694		552.8	530.5	609.3	518	503.3	737.6	535.3	463.2	738	667.2
Q8BH95	Echs1	PE	Enoyl-CoA hydratase, mitochondrial OS=Mus musculus GN=Echs1 PE=1 SV=1	18.2759	6	7	6	290	31.454	8.48				0.832	1.147	0.897	1.123	1.128	0.803	0.625	0.974		731.9	556.9	608.6	839.6	433.7	656.8	821.6	675.3	825.7	693.5
P97372	Psme2	PE	Proteasome activator complex subunit 2 OS=Mus musculus GN=Psme2 PE=1 SV=4	39.749	9	11	9	239	27.04	5.76				1.523	1.225	1.658	0.785	2.843	1.013	0.574	0.516		399.4	689.8	608.4	489.4	391	662.2	313.5	351.6	1135.6	681
P62264	Rps14	PE	40S ribosomal protein S14 OS=Mus musculus GN=Rps14 PE=1 SV=3	41.0596	9	36	9	151	16.263	10.05				0.903	0.896	1.117	1.559	1.015	0.932	7.739	1.134		668.6	604.5	603.8	598.9	5017.4	747.1	1042.6	734.9	678.6	648.3
Q8BFP9	Pdk1	PE	[Pyruvate dehydrogenase (acetyl-transferring)] kinase isozyme 1, mitochondrial OS=Mus musculus GN=Pdk1 PE=1 SV=2	16.8203	7	14	7	434	48.964	8.19				0.701	0.918	0.705	0.992	0.732	0.63	0.577	0.748		859.7	484.7	602.8	789.1	443.8	606.1	852.8	575.2	629	769.1
Q8CGK3	Lonp1	PE	Lon protease homolog, mitochondrial OS=Mus musculus GN=Lonp1 PE=1 SV=2	9.16754	10	11	10	949	105.776	6.57				0.795	1.438	0.97	1.087	1.135	0.785	0.826	1.091		757.5	518.1	602	1089.3	545.1	735.1	823.4	720.2	859.4	660.1
Q8CHI8	Ep400	PE	E1A-binding protein p400 OS=Mus musculus GN=Ep400 PE=1 SV=3	5.53385	15	15	15	3072	336.97	9.14				0.84	1.177	0.809	1.129	0.959	0.863	0.733	1.217		713.4	549.9	599.3	839.5	466.8	576.9	805.4	775.4	684.1	637
P53026	Rpl10a	PE	60S ribosomal protein L10a OS=Mus musculus GN=Rpl10a PE=1 SV=3	34.5622	7	12	7	217	24.901	9.98				1.432	1.188	1.666	0.956	1.823	1.082	1.54	1.016		417.4	506.9	597.7	495.8	721.7	695.1	398.8	476	760.7	468.5
A0A140T8V3	Vdac3-ps1	PE	Uncharacterized protein OS=Mus musculus GN=Vdac3-ps1 PE=4 SV=1	32.8622	8	11	7	283	30.676	8.66				1.12	1.173	1.253	0.936	1.361	0.983	0.756	0.706		533.3	577.6	597.2	625.8	444	668.4	499.4	414.8	726	587.3
Q8K1B8	Fermt3	PE	Fermitin family homolog 3 OS=Mus musculus GN=Fermt3 PE=1 SV=1	18.0451	10	11	10	665	75.587	7.05				1.053	1.115	1.145	0.899	1.71	0.901	0.622	0.701		564.6	677.6	594.8	629.8	468.4	646.6	507.7	527.1	965.6	752.4
Q9CWJ9	Atic	PE	Bifunctional purine biosynthesis protein PURH OS=Mus musculus GN=Atic PE=1 SV=2	17.9054	9	12	9	592	64.177	6.76				1.276	1.151	1.348	0.701	2.248	0.906	0.572	0.56		464.1	624.6	592.1	534.1	394.3	625.8	325.5	385.7	1043.2	689
Q99KP6	Prpf19	PE	Pre-mRNA-processing factor 19 OS=Mus musculus GN=Prpf19 PE=1 SV=1	20.4365	10	13	10	504	55.204	6.61				1.01	1.002	1.067	1.078	1.125	0.786	0.815	0.775		583.9	515.1	589.9	585.4	534	623.1	629.5	507.9	657.2	655.5
Q9D8W5	Psmd12	PE	26S proteasome non-ATPase regulatory subunit 12 OS=Mus musculus GN=Psmd12 PE=1 SV=4	23.4649	10	11	10	456	52.861	7.06				1.032	0.974	0.998	1.126	1.387	0.79	0.596	0.767		570.1	539.6	588.3	555.5	406.9	569	641.7	523.7	790.7	682.9
Q6PDI5	Ecm29	PE	Proteasome-associated protein ECM29 homolog OS=Mus musculus GN=Ecm29 PE=1 SV=3	7.77174	12	13	12	1840	203.573	7.06				0.767	1.366	1.271	0.609	0.588	0.908	0.715	0.561		765.7	717.1	587.6	1045.8	564.6	973.2	466	442.7	450.5	789.8
P47963	Rpl13	PE	60S ribosomal protein L13 OS=Mus musculus GN=Rpl13 PE=1 SV=3	27.0142	6	10	6	211	24.291	11.55				1.334	1.058	1.391	0.738	1.248	1.223	1.857	0.969		440.4	522.9	587.4	465.9	794	612.7	325	414.4	549.5	427.7
P60766	Cdc42	PE	Cell division control protein 42 homolog OS=Mus musculus GN=Cdc42 PE=1 SV=2	42.4084	7	9	6	191	21.245	6.55				1.292	0.905	1.545	0.894	2.594	0.924	0.946	0.541		453.9	576.3	586.3	410.8	590	701.1	405.8	337.6	1177.5	623.7
Q8BJ71	Nup93	PE	Nuclear pore complex protein Nup93 OS=Mus musculus GN=Nup93 PE=1 SV=1	7.08181	7	7	7	819	93.222	5.72				1.017	1.196	1.465	0.955	1.202	0.809	0.711	0.645		571.4	597	581.3	683.5	524.4	836.8	545.9	475.7	686.6	737.8
Q7TNV0	Dek	PE	Protein DEK OS=Mus musculus GN=Dek PE=1 SV=1	21.3158	9	10	9	380	43.132	6.86				1.297	1.21	1.186	1.09	2.272	1.18	1.162	1.001		445.7	548.5	578.1	539.5	540.1	528.6	486	465.5	1012.5	464.9
Q8BGB5	Limd2	PE	LIM domain-containing protein 2 OS=Mus musculus GN=Limd2 PE=1 SV=1	42.9688	8	23	8	128	14.228	9.04				0.759	0.722	0.918	1.05	0.975	0.935	7.619	0.76		761.5	742.7	577.9	549.9	6052.2	699.1	799.7	604	742.8	794.3
Q8K224	Nat10	PE	RNA cytidine acetyltransferase OS=Mus musculus GN=Nat10 PE=1 SV=1	12.0117	11	14	11	1024	115.346	8.32				0.948	1.125	0.934	1.118	0.981	1.011	0.951	1.426		606	541.9	574.2	681.8	509.8	566.2	677.8	764.3	594.5	535.9
Q8BG81	Poldip3	PE	Polymerase delta-interacting protein 3 OS=Mus musculus GN=Poldip3 PE=1 SV=1	30.9524	13	21	13	420	46.104	10.05				0.696	0.962	0.803	1.141	0.849	0.813	5.167	1.025		824.6	602.1	573.8	793.5	3827.4	662.5	940.9	759.4	699.9	740.7
Q9D7Z3	Nol7	PE	Nucleolar protein 7 OS=Mus musculus GN=Nol7 PE=1 SV=1	8.66142	3	6	3	254	28.952	9.61				1.39	2.803	1.685	1.637	1.424	1.193	1.667	1.615		411.4	520.6	572	1152.8	727.2	693.2	673.2	704.8	586	436.3
O35381	Anp32a	PE	Acidic leucine-rich nuclear phosphoprotein 32 family member A OS=Mus musculus GN=Anp32a PE=1 SV=1	13.3603	4	8	2	247	28.52	4.07				1.545	1.395	1.97	0.821	2.908	1.076	0.731	0.509		370	680.6	571.6	516.1	462.4	729	303.6	321.9	1076.1	632.7
O55131	Sept7	PE	Septin-7 OS=Mus musculus GN=Sept7 PE=1 SV=1	9.86239	5	9	4	436	50.518	8.57				0.938	0.89	0.945	0.864	1.443	0.965	0.572	0.807		608.9	629.6	571.3	542.1	373.3	575.4	526	526.4	878.5	652.7
Q8BIQ5	Cstf2	PE	Cleavage stimulation factor subunit 2 OS=Mus musculus GN=Cstf2 PE=1 SV=2	9.48276	6	7	6	580	61.302	6.83				0.862	1.246	1.221	0.743	0.784	0.927	0.669	0.608		661.8	660.1	570.3	824.3	476.1	808.2	491.6	433	518.7	712
P14211	Calr	PE	Calreticulin OS=Mus musculus GN=Calr PE=1 SV=1	13.9423	7	9	7	416	47.965	4.49				1.569	1.151	1.743	0.679	3.6	0.941	0.624	0.502		363.5	570	570.1	418.2	378.4	633.6	247	304.5	1308.7	606.1
P62849	Rps24	PE	40S ribosomal protein S24 OS=Mus musculus GN=Rps24 PE=1 SV=1	33.8346	4	12	4	133	15.413	10.78				0.879	1.281	1.244	1.034	1.331	1.016	5.295	1.305		647.6	578.9	569.4	829.6	3016.3	805.6	669.4	743.5	861.8	569.6
Q3U0V1	Khsrp	PE	Far upstream element-binding protein 2 OS=Mus musculus GN=Khsrp PE=1 SV=2	19.6524	11	11	8	748	76.728	7.33				1.347	1.488	1.237	1.216	2.146	0.967	0.616	0.623		421.8	623.9	568.3	627.9	397.3	521.7	512.8	401.9	905.3	645
Q61598	Gdi2	PE	Rab GDP dissociation inhibitor beta OS=Mus musculus GN=Gdi2 PE=1 SV=1	19.7753	8	10	8	445	50.505	6.25				1.338	1.07	1.501	0.856	2.712	1.036	0.629	0.607		423.2	651.4	566.2	452.9	395.6	635.2	362.1	381.6	1147.8	628.5
Q8BK67	Rcc2	PE	Protein RCC2 OS=Mus musculus GN=Rcc2 PE=1 SV=1	16.7308	9	12	9	520	55.948	8.72				1.323	1.136	1.398	0.987	2.416	1.119	0.774	0.759		426.3	649.9	564.1	484.3	449.3	595.9	420.9	440.8	1029.9	580.6
B2RY56	Rbm25	PE	RNA-binding protein 25 OS=Mus musculus GN=Rbm25 PE=1 SV=2	9.54654	8	9	8	838	99.491	6.32				0.949	1.16	1.119	0.874	1.669	1.003	1.103	1.13		593.4	586.7	563.2	688.4	645.3	664.2	518.9	661.2	990.3	584.8
Q9CPW4	Arpc5	PE	Actin-related protein 2/3 complex subunit 5 OS=Mus musculus GN=Arpc5 PE=1 SV=3	29.8013	5	7	5	151	16.278	5.67				0.901	0.742	0.935	0.685	1.095	0.827	0.737	0.49		623.9	529.1	561.9	463.2	472	583.4	427.4	313.8	683.4	640
Q9JLQ0	Cd2ap	PE	CD2-associated protein OS=Mus musculus GN=Cd2ap PE=1 SV=3	16.7975	10	11	10	637	70.407	6.38				1.238	1.08	1.316	1.432	1.391	1.211	1.013	1.593		453.3	541.2	561.1	489.7	452.6	596.6	649	712	630.5	446.9
Q3UJB0	Sf3b2	PE	Putative uncharacterized protein OS=Mus musculus GN=Sf3b2 PE=1 SV=1	9.79499	9	10	9	878	98.137	5.62				1.303	1.62	1.509	1.442	1.954	0.92	1.154	0.991		430.1	490.1	560.5	696.9	614.3	649.1	620.2	527.7	840.4	532.5
Q64433	Hspe1	PE	10 kDa heat shock protein, mitochondrial OS=Mus musculus GN=Hspe1 PE=1 SV=2	37.2549	5	6	5	102	10.956	8.35				1.198	1.335	1.481	1.005	1.954	1.122	0.707	0.732		465.9	710.9	558.2	621.9	447.9	689.8	468	463.3	910.6	633.4
Q64213	Sf1	PE	Splicing factor 1 OS=Mus musculus GN=Sf1 PE=1 SV=6	9.80092	5	10	5	653	70.358	8.98				0.915	0.814	0.825	1.04	1.157	0.817	1.685	0.804		608.5	495.5	556.9	495.3	1021.8	502	633	487.2	704	606.3
Q60953	Pml	PE	Protein PML OS=Mus musculus GN=Pml PE=1 SV=3	12.8814	11	13	11	885	98.18	5.63				0.895	0.828	0.939	0.807	1.072	0.91	0.83	1.04		621.7	464.5	556.6	515	423.2	583.8	501.7	530.7	666.8	510.1
P35235	Ptpn11	PE	Tyrosine-protein phosphatase non-receptor type 11 OS=Mus musculus GN=Ptpn11 PE=1 SV=2	10.3853	6	6	6	597	68.417	7.3				3.294	1.366	3.131	1.414	4.054	1.591	1.417	2.353		168.9	320.3	556.2	230.6	285.3	528.6	238.8	473.7	684.6	201.3
Q8BU11	Tox4	PE	TOX high mobility group box family member 4 OS=Mus musculus GN=Tox4 PE=1 SV=3	16.3166	8	12	8	619	65.92	5.01				0.776	1.034	0.769	1.122	0.714	0.869	0.607	1.09		709.8	521.3	550.7	733.7	364.2	545.8	796.1	653.4	506.5	599.7
Q9DBG3	Ap2b1	PE	AP-2 complex subunit beta OS=Mus musculus GN=Ap2b1 PE=1 SV=1	6.40342	7	7	1	937	104.516	5.38				1.121	1.018	1.035	0.979	1.775	0.803	0.663	0.644		490.7	475.9	550	499.4	392.9	507.7	480.2	381.6	871.3	592.7
E9PYL9	Gm10036	PE	Uncharacterized protein OS=Mus musculus GN=Gm10036 PE=3 SV=1	33.7079	8	15	8	178	20.254	9.51				0.944	0.898	1.19	1.39	1.248	0.942	7.699	0.941		582.6	603.6	549.8	523	4935.3	693.3	809.5	603	727.2	641
P42209	Sept1	PE	Septin-1 OS=Mus musculus GN=Sept1 PE=1 SV=2	19.1257	7	11	7	366	41.993	5.82				1.107	1.136	1.046	0.868	1.783	0.815	0.551	0.648		495.7	555.6	548.7	562.9	375.2	518.5	430.2	441.6	883.8	681.6
P47738	Aldh2	PE	Aldehyde dehydrogenase, mitochondrial OS=Mus musculus GN=Aldh2 PE=1 SV=1	20.2312	10	11	9	519	56.502	7.62				0.921	1.66	1.115	1.193	1.111	0.891	0.838	1.238		593.3	473.8	546.5	984.7	445.7	661.4	707.6	658.4	659.3	531.8
A0A1L1ST33	4	SV	Uncharacterized protein OS=Mus musculus PE=4 SV=1	17.7291	11	193	4	502	58.43	8.25				2.824	0.804	2.398	0.808	2.849	3.083	2.182	4.529		192.9	505.9	544.7	155.2	358.1	462.6	155.9	743.3	549.5	164.1
P14206	Rpsa	PE	40S ribosomal protein SA OS=Mus musculus GN=Rpsa PE=1 SV=4	30.5085	8	11	8	295	32.817	4.87				1.606	1.074	1.567	1.073	2.504	1.093	0.748	0.69		335.7	525.7	539.2	360.6	359.8	526.2	360.2	332.2	840.5	481.2
P47740	Aldh3a2	PE	Fatty aldehyde dehydrogenase OS=Mus musculus GN=Aldh3a2 PE=1 SV=2	23.1405	10	11	10	484	53.936	8.35				0.912	1.376	1.34	0.879	0.898	0.976	1.052	0.802		589.3	629.9	537.5	811.1	678.6	789.5	517.9	517.7	529.1	645.3
P68040	Rack1	PE	Receptor of activated protein C kinase 1 OS=Mus musculus GN=Rack1 PE=1 SV=3	23.6593	7	8	7	317	35.055	7.69				1.538	1.034	1.563	1.056	3.08	1.181	0.814	0.616		349.3	609	537.3	361	419.7	546	369	317.5	1075.6	515.7
E9Q616	Ahnak	PE	AHNAK nucleoprotein (desmoyokin) OS=Mus musculus GN=Ahnak PE=1 SV=1	7.83239	6	15	6	5656	603.866	6.3				0.859	1.44	1.081	1.156	1.224	0.958	0.91	1.494		622.6	518.6	534.9	896.7	492.5	672.9	719.7	808.3	761.8	541.1
P47226	Tes	PE	Testin OS=Mus musculus GN=Tes PE=1 SV=1	11.3475	5	6	5	423	47.951	8.31				1.644	0.933	1.518	0.971	2.012	1.36	1.992	1.651		324.9	492.7	534.4	303.1	721.8	493.4	315.6	598.5	653.8	362.4
Q8BYW1	Arhgap25	PE	Rho GTPase-activating protein 25 OS=Mus musculus GN=Arhgap25 PE=1 SV=2	12.1914	9	10	8	648	73.337	6.38				0.903	1.073	0.886	1.01	1.148	0.946	0.767	0.872		591.2	560.8	533.9	634.4	454.5	523.8	597	516.9	678.8	592.7
Q9R112	Sqrdl	PE	Sulfide:quinone oxidoreductase, mitochondrial OS=Mus musculus GN=Sqrdl PE=1 SV=3	16	7	8	7	450	50.25	9.09				0.747	1.009	0.752	1.17	0.767	0.734	1.969	0.944		713	439.5	532.7	719.2	1178.8	536.2	834.2	565.3	547.1	598.7
P46638	Rab11b	PE	Ras-related protein Rab-11B OS=Mus musculus GN=Rab11b PE=1 SV=3	20.1835	5	6	5	218	24.474	5.94				1.352	1.118	1.493	0.969	2.227	0.94	0.665	0.523		393.3	539.1	531.9	439.6	381.3	587.2	381.1	299.7	876	573.4
P25976	Ubtf	PE	Nucleolar transcription factor 1 OS=Mus musculus GN=Ubtf PE=1 SV=1	13.0719	9	10	9	765	89.453	5.76				1.455	1.319	1.314	1.502	1.699	0.844	1.202	0.799		364.6	386.7	530.3	481	550.7	479.2	547.8	365.9	619.4	458
Q80X82	Sympk	PE	Symplekin OS=Mus musculus GN=Sympk PE=1 SV=1	9.7352	10	10	10	1284	142.194	6.05				0.844	1.227	1.011	0.766	0.655	0.864	0.647	0.704		627.3	547.7	529.3	769.8	410.2	634.3	480.3	445.9	410.8	633.7
Q3U1J4	Ddb1	PE	DNA damage-binding protein 1 OS=Mus musculus GN=Ddb1 PE=1 SV=2	8.33333	8	9	8	1140	126.772	5.26				1.272	1.328	1.412	1.107	1.803	0.819	0.716	0.798		416.2	480.8	529.3	552.8	420.6	587.9	460.6	468.5	750.4	587.2
Q91WN1	Dnajc9	PE	DnaJ homolog subfamily C member 9 OS=Mus musculus GN=Dnajc9 PE=1 SV=2	15.0579	5	6	5	259	30.04	5.94				1.249	1.362	1.482	1.814	2.024	0.896	2.15	0.715		422.4	529.7	527.8	575.2	1271.5	626.2	766.4	422.7	854.9	591.4
Q61792	Lasp1	PE	LIM and SH3 domain protein 1 OS=Mus musculus GN=Lasp1 PE=1 SV=1	23.1939	6	8	6	263	29.975	7.05				1.169	0.984	1.225	1.066	1.931	1.029	0.742	0.757		450.3	573.9	526.2	443.2	413.5	551.7	480.2	421.9	869.5	557.5
Q9QXK7	Cpsf3	PE	Cleavage and polyadenylation specificity factor subunit 3 OS=Mus musculus GN=Cpsf3 PE=1 SV=2	7.45614	5	6	5	684	77.455	5.6				0.953	1.067	0.893	1.059	1.149	0.864	0.687	1.034		550.3	473.7	524.6	587	376.7	491.4	583	567.1	632.2	548.4
P70429	Evl	PE	Ena/VASP-like protein OS=Mus musculus GN=Evl PE=1 SV=2	30.4348	10	12	10	414	44.31	8.85				1.053	0.99	1.098	0.944	1.578	1.005	0.795	0.922		493.6	554.8	519.9	488.6	438.5	542	465.7	509	778.7	551.8
Q8CIN4	Pak2	PE	Serine/threonine-protein kinase PAK 2 OS=Mus musculus GN=Pak2 PE=1 SV=1	16.2214	7	8	7	524	57.894	5.77				1.638	1.141	1.785	1.042	2.653	1.295	0.82	1.115		315.9	555.3	517.5	360.6	351.4	563.9	329.1	477.7	838	428.6
Q9Z0N1	Eif2s3x	PE	Eukaryotic translation initiation factor 2 subunit 3, X-linked OS=Mus musculus GN=Eif2s3x PE=1 SV=2	11.2288	5	8	5	472	51.033	8.4				1.24	1.018	1.101	1.03	1.884	0.96	0.943	0.754		416.3	526.2	516.3	423.7	517.1	458.3	429	413.4	784.2	548.4
P14685	Psmd3	PE	26S proteasome non-ATPase regulatory subunit 3 OS=Mus musculus GN=Psmd3 PE=1 SV=3	19.2453	9	10	9	530	60.68	8.44				1.284	0.866	1.082	1.023	1.382	1.151	0.734	0.994		400.4	471.8	514.3	346.9	301.1	433.2	409.5	407.5	553.3	410
Q9EQU5	Set	PE	Protein SET OS=Mus musculus GN=Set PE=1 SV=1	19.0311	6	9	6	289	33.358	4.32				1.118	1.054	1.219	0.738	2.035	0.974	0.509	0.617		456.7	580.8	510.6	481.5	303.4	556.9	337.1	368.2	929.6	596.5
P97376	Frg1	PE	Protein FRG1 OS=Mus musculus GN=Frg1 PE=1 SV=2	31.0078	8	16	8	258	29.109	8.92				0.796	0.978	0.839	1.451	0.961	0.77	1.516	1.082		640.4	478.4	509.6	626.5	941.5	537.1	929.5	672.4	615.5	621.1
Q8K2C9	Hacd3	PE	Very-long-chain (3R)-3-hydroxyacyl-CoA dehydratase 3 OS=Mus musculus GN=Hacd3 PE=1 SV=2	17.6796	6	9	6	362	43.103	9.13				1.767	1.174	1.736	0.893	1.848	1.61	1.752	1.519		288.2	508.9	509.3	338.5	553.9	500.5	257.3	480	532.6	316.1
Q9CQN1	Trap1	PE	Heat shock protein 75 kDa, mitochondrial OS=Mus musculus GN=Trap1 PE=1 SV=1	11.898	8	10	7	706	80.159	6.68				1.046	1.584	1.226	1.059	1.285	0.863	0.822	0.725		486.3	544.3	508.9	770.3	518.2	596.3	515.2	457	624.7	630.8
Q9EPU4	Cpsf1	PE	Cleavage and polyadenylation specificity factor subunit 1 OS=Mus musculus GN=Cpsf1 PE=1 SV=1	5.34351	9	9	9	1441	160.716	6.39				0.936	1.172	0.964	1.174	1.039	0.557	0.542	0.604		543	476.5	508.4	636.4	463.8	523.5	637.7	516.1	564.1	855.2
P62259	Ywhae	PE	14-3-3 protein epsilon OS=Mus musculus GN=Ywhae PE=1 SV=1	31.7647	8	14	5	255	29.155	4.74				1.299	1.018	1.453	1.131	1.941	1.076	0.926	0.754		391.1	495.6	508	398.3	426.1	568.2	442.2	347.3	759.2	460.4
P57780	Actn4	PE	Alpha-actinin-4 OS=Mus musculus GN=Actn4 PE=1 SV=1	31.25	25	33	13	912	104.911	5.41				0.862	0.735	0.766	0.953	1.173	0.651	0.558	0.531		588.2	433.9	507.3	432.5	372.2	450.3	560.6	354.3	690.2	666.9
Q6P5E4	Uggt1	PE	UDP-glucose:glycoprotein glucosyltransferase 1 OS=Mus musculus GN=Uggt1 PE=1 SV=4	7.41457	11	12	11	1551	176.323	5.62				1.679	0.999	1.657	0.901	2.511	1.145	0.885	1.059		301.3	446.8	506	301	345.6	499.3	271.6	413.2	756.7	390.3
P13379	Cd5	PE	T-cell surface glycoprotein CD5 OS=Mus musculus GN=Cd5 PE=1 SV=1	15.1822	6	8	6	494	53.815	8.21				2.584	0.833	2.252	0.619	2.859	0.7	0.612	0.719		195	149.1	503.8	162.4	130.4	439	120.7	153.2	557.3	212.9
Q99LC5	Etfa	PE	Electron transfer flavoprotein subunit alpha, mitochondrial OS=Mus musculus GN=Etfa PE=1 SV=2	28.5285	7	9	7	333	34.988	8.38				0.931	1.417	1.264	1.092	1.152	0.861	0.888	1.004		540.8	478.6	503.6	766.1	493.6	683.5	590.5	557.6	623.2	555.6
Q91YR7	Prpf6	PE	Pre-mRNA-processing factor 6 OS=Mus musculus GN=Prpf6 PE=1 SV=1	6.05739	7	8	7	941	106.655	8.09				0.989	1.05	1.032	1.033	1.17	0.841	0.865	0.989		506.3	421.7	500.9	531.4	433.8	522.3	522.8	496	592.6	501.3
Q9ERU9	Ranbp2	PE	E3 SUMO-protein ligase RanBP2 OS=Mus musculus GN=Ranbp2 PE=1 SV=2	4.84769	14	15	14	3053	340.907	6.18				0.719	0.987	0.713	0.877	0.647	0.656	0.632	0.825		696.1	441.4	500.7	686.8	425	496	610.2	554.7	450.3	672.5
Q91VR5	Ddx1	PE	ATP-dependent RNA helicase DDX1 OS=Mus musculus GN=Ddx1 PE=1 SV=1	8.51351	7	7	7	740	82.448	7.21				0.967	0.986	1.071	1.026	1.543	0.879	0.948	0.848		516.9	486.9	499.6	509.6	525.2	553.8	530.2	469.3	797.7	553.8
Q99JF8	Psip1	PE	PC4 and SFRS1-interacting protein OS=Mus musculus GN=Psip1 PE=1 SV=1	8.71212	5	6	5	528	59.66	9.13				1.415	1.62	1.67	1.341	2.561	1.391	1.815	1.09		352.1	537.8	498.2	570.3	701.8	588.1	472.3	421.6	901.9	386.7
Q9JIX8	Acin1	PE	Apoptotic chromatin condensation inducer in the nucleus OS=Mus musculus GN=Acin1 PE=1 SV=3	4.18535	6	7	6	1338	150.629	5.91				1.053	1.386	1.208	1.117	1.331	0.96	1.269	1.26		471.4	406.1	496.3	653.5	537.1	569.4	526.5	533.3	627.5	423.1
Q9CU62	Smc1a	PE	Structural maintenance of chromosomes protein 1A OS=Mus musculus GN=Smc1a PE=1 SV=4	7.70479	10	11	10	1233	143.146	7.64				0.932	0.93	0.918	1.419	1.164	0.748	0.769	0.717		532.1	490	495.7	495.1	504	488.5	755.2	469.5	619.4	655.1
Q501J6	Ddx17	PE	Probable ATP-dependent RNA helicase DDX17 OS=Mus musculus GN=Ddx17 PE=1 SV=1	25.6923	17	31	8	650	72.354	8.59				1.277	0.993	1.372	1.095	2.13	1.05	1.808	0.782		388.1	553.9	495.4	385.5	953.8	532.3	425.1	412.8	826.7	527.5
P56959	Fus	PE	RNA-binding protein FUS OS=Mus musculus GN=Fus PE=1 SV=1	9.65251	8	11	6	518	52.642	9.36				0.848	0.97	1.164	1.543	1.465	0.723	5.205	1.371		577.7	479.5	490	560.1	3449.9	672.5	891.7	909	846.6	662.8
Q9Z2I9	Sucla2	PE	Succinate--CoA ligase [ADP-forming] subunit beta, mitochondrial OS=Mus musculus GN=Sucla2 PE=1 SV=2	11.4471	6	7	6	463	50.082	7.01				1.023	1.235	1.224	1.1	1.535	0.846	0.968	0.853		478.1	496.8	488.8	590.6	568.5	585.3	526	501.2	733.6	587.4
Q60611	Satb1	PE	DNA-binding protein SATB1 OS=Mus musculus GN=Satb1 PE=1 SV=2	6.80628	6	6	6	764	85.826	6.54				1.053	0.871	1.069	1.027	1.577	0.804	0.93	0.742		462.9	438.4	487.2	403.4	506.8	494.7	475.5	404.1	729.9	545
Q6ZWU9	Rps27	PE	40S ribosomal protein S27 OS=Mus musculus GN=Rps27 PE=1 SV=3	40.4762	5	16	2	84	9.455	9.45				0.783	0.908	0.888	1.137	0.835	0.901	5.359	1.01		621.7	487.2	486.8	564.5	2899.2	552.3	706.9	546.4	519.1	541
Q8QZT1	Acat1	PE	Acetyl-CoA acetyltransferase, mitochondrial OS=Mus musculus GN=Acat1 PE=1 SV=1	20.0472	7	12	7	424	44.787	8.51				0.997	1.104	0.996	0.987	1.325	0.917	1.496	0.756		486.7	496.2	485	537.3	809.6	484.8	480.4	409.1	644.9	541.2
P50544	Acadvl	PE	Very long-chain specific acyl-CoA dehydrogenase, mitochondrial OS=Mus musculus GN=Acadvl PE=1 SV=3	11.8902	7	10	7	656	70.831	8.75				0.787	1.638	1.126	1.238	1.115	0.607	0.638	0.733		615.2	444.5	483.9	1007.8	467.7	692.5	761.5	537.4	685.7	732.9
Q5FWK3	Arhgap1	PE	Rho GTPase-activating protein 1 OS=Mus musculus GN=Arhgap1 PE=1 SV=1	13.2118	6	6	6	439	50.379	6.44				1.356	1.342	1.491	1.184	2.372	0.986	0.763	0.601		355.9	517	482.7	477.6	400.5	530.9	421.4	315.3	844.1	524.6
Q6DFW4	Nop58	PE	Nucleolar protein 58 OS=Mus musculus GN=Nop58 PE=1 SV=1	22.2015	9	12	9	536	60.305	8.34				1.13	0.955	1.149	1.111	1.297	0.872	1.859	0.953		426.1	386.9	481.6	406.7	824.6	489.7	473.4	422.6	552.7	443.5
Q8VCW8	Acsf2	PE	Acyl-CoA synthetase family member 2, mitochondrial OS=Mus musculus GN=Acsf2 PE=1 SV=1	17.0732	8	8	8	615	67.907	8.18				0.91	1.252	1.021	1.056	1.207	0.825	0.854	1.204		528.9	387.5	481.1	662.4	401.3	539.9	558.3	565.5	638.2	469.8
Q9WTL7	Lypla2	PE	Acyl-protein thioesterase 2 OS=Mus musculus GN=Lypla2 PE=1 SV=1	25.974	5	9	5	231	24.778	7.23				0.882	0.977	0.903	1.017	0.794	1.145	0.912	1.225		544.6	466.7	480.5	532.2	371.7	491.7	553.5	499.4	432.1	407.7
Q9DCD0	Pgd	PE	6-phosphogluconate dehydrogenase, decarboxylating OS=Mus musculus GN=Pgd PE=1 SV=3	15.3209	7	9	7	483	53.213	7.23				1.426	1.027	1.629	1.033	2.957	0.913	0.548	0.473		336.5	504.7	479.8	345.7	302.6	548.3	347.5	261.4	995.1	552.7
Q6ZWV3	Rpl10	PE	60S ribosomal protein L10 OS=Mus musculus GN=Rpl10 PE=1 SV=3	29.4393	6	11	6	214	24.588	10.08				1.299	1.164	1.451	1.19	1.284	0.992	2.841	1.201		368.2	342.4	478.3	428.5	980.3	534.2	438.1	414.3	472.7	345
Q925I1	Atad3	PE	ATPase family AAA domain-containing protein 3 OS=Mus musculus GN=Atad3 PE=1 SV=1	17.4281	11	12	11	591	66.701	9.29				0.756	0.961	0.96	1.053	0.995	0.844	1.744	0.929		630.6	507.3	476.9	606.3	1047.7	605.5	664.1	558.3	627.3	600.8
Q9DB77	Uqcrc2	PE	Cytochrome b-c1 complex subunit 2, mitochondrial OS=Mus musculus GN=Uqcrc2 PE=1 SV=1	20.0883	8	9	8	453	48.205	9.25				1.149	1.046	1.244	0.979	1.963	1.01	0.946	0.725		414.3	522.7	476	433.2	489.2	515.6	405.5	375.1	813.4	517.4
Q99NB9	Sf3b1	PE	Splicing factor 3B subunit 1 OS=Mus musculus GN=Sf3b1 PE=1 SV=1	6.97853	8	10	8	1304	145.724	7.09				1.066	1.36	1.131	1.232	1.415	0.7	0.825	0.826		446.3	365.3	475.9	607.2	431	504.6	550	431.1	631.6	522.2
P62267	Rps23	PE	40S ribosomal protein S23 OS=Mus musculus GN=Rps23 PE=1 SV=3	29.3706	5	11	5	143	15.798	10.49				1.118	2.054	1.125	1.211	1.223	1.114	1.953	1.476		423.1	440	472.8	868.9	771.9	475.9	512.2	583.3	517.4	395.2
Q61753	Phgdh	PE	D-3-phosphoglycerate dehydrogenase OS=Mus musculus GN=Phgdh PE=1 SV=3	18.1989	8	11	8	533	56.549	6.54				1.413	1.125	1.331	0.752	1.975	1.056	0.818	0.772		334.1	439.4	472	375.9	340.3	444.6	251.2	321.1	659.7	416.1
Q9R233	Tapbp	PE	Tapasin OS=Mus musculus GN=Tapbp PE=1 SV=2	14.4086	7	11	7	465	49.705	8.5				1.294	1.525	1.148	0.817	2.253	0.827	0.52	0.47		364.7	555.6	471.9	556.2	349.3	418.5	297.9	316.2	821.7	672.2
Q920B9	Supt16h	PE	FACT complex subunit SPT16 OS=Mus musculus GN=Supt16h PE=1 SV=2	5.82617	7	7	7	1047	119.749	5.66				1.198	1.179	1.21	1.153	1.908	0.974	1.176	0.795		392.6	447.5	470.2	463	539.9	475	452.7	365.2	749	459.2
P68033	Actc1	PE	Actin, alpha cardiac muscle 1 OS=Mus musculus GN=Actc1 PE=1 SV=1	30.504	13	105	3	377	41.992	5.39				0.894	0.841	0.924	0.619	1.225	0.894	0.796	0.567		525.8	526.1	470.1	442.4	468.4	486	325.4	334	644.2	588.7
Q8BG32	Psmd11	PE	26S proteasome non-ATPase regulatory subunit 11 OS=Mus musculus GN=Psmd11 PE=1 SV=3	14.9289	6	6	6	422	47.407	6.48				1.251	1.068	1.08	1.249	1.732	0.873	0.531	0.855		371.5	433.5	464.8	396.8	263.6	401.2	463.8	424.6	643.3	496.6
Q91VR2	Atp5c1	PE	ATP synthase subunit gamma, mitochondrial OS=Mus musculus GN=Atp5c1 PE=1 SV=1	23.4899	7	12	7	298	32.865	9.01				1.056	1.013	1.057	1.009	1.496	0.977	1.274	0.842		439.8	502.7	464.6	445.8	655.8	464.7	443.8	433.5	657.8	514.6
P70279	Surf6	PE	Surfeit locus protein 6 OS=Mus musculus GN=Surf6 PE=1 SV=1	13.8028	6	7	6	355	41.21	10.52				0.988	1.424	1.188	0.995	1.244	0.962	1.277	1.255		470.5	465	464.6	669.9	616.8	558.8	468	606.5	585.1	483.2
Q9DAW6	Prpf4	PE	U4/U6 small nuclear ribonucleoprotein Prp4 OS=Mus musculus GN=Prpf4 PE=1 SV=1	16.8906	8	10	8	521	58.333	7.28				0.846	0.976	0.827	1.107	1.022	0.863	0.799	0.922		544.5	457.1	460.4	531.2	422.7	450.4	602.5	488.2	556.6	529.3
P62192	Psmc1	PE	26S protease regulatory subunit 4 OS=Mus musculus GN=Psmc1 PE=1 SV=1	13.8636	6	6	5	440	49.154	6.21				1.271	1.002	1.23	1.228	1.628	0.872	0.695	0.921		361.7	369.7	459.8	362.3	294.8	445	444.1	390.5	588.7	424
P19973	Lsp1	PE	Lymphocyte-specific protein 1 OS=Mus musculus GN=Lsp1 PE=1 SV=2	16.3636	6	9	6	330	36.692	4.82				0.99	0.955	0.989	1.207	1.014	1.065	0.958	1.184		458.3	392	453.6	437.7	352.5	453.1	553.2	435.7	464.5	368.1
P46460	Nsf	PE	Vesicle-fusing ATPase OS=Mus musculus GN=Nsf PE=1 SV=2	8.19892	6	8	6	744	82.561	6.95				1.137	0.967	1.044	1.09	1.303	0.825	0.644	0.705		397.1	355.1	451.6	384.1	277.1	414.7	432.7	303.3	517.2	430.5
O35601	Fyb	PE	FYN-binding protein OS=Mus musculus GN=Fyb PE=1 SV=2	9.15751	7	7	7	819	90.001	6.98				0.989	0.991	1.146	0.966	1.3	0.932	0.709	0.949		456.5	456.2	451.6	452.3	347	522.9	441.1	464.3	593.5	489.3
Q3TXS7	Psmd1	PE	26S proteasome non-ATPase regulatory subunit 1 OS=Mus musculus GN=Psmd1 PE=1 SV=1	8.60441	7	7	7	953	105.663	5.39				1.08	1.024	1.072	1.253	1.386	0.874	0.682	0.953		416.9	407.9	450.2	427	318.2	446.8	522.4	444.8	577.9	466.5
Q9D1R9	Rpl34	PE	60S ribosomal protein L34 OS=Mus musculus GN=Rpl34 PE=1 SV=2	34.188	5	6	5	117	13.284	11.47				1.725	1.522	1.886	0.966	2.084	0.937	1.696	0.789		260.8	375.7	450	396.9	680.2	492	252.1	316.5	543.5	401
P97461	Rps5	PE	40S ribosomal protein S5 OS=Mus musculus GN=Rps5 PE=1 SV=3	39.7059	11	29	11	204	22.875	9.72				0.85	0.767	1.13	1.698	1.092	0.948	10.263	0.996		528.5	466.3	449	405.7	5050.4	597.2	897.7	490.3	577.2	492.1
P45376	Akr1b1	PE	Aldose reductase OS=Mus musculus GN=Akr1b1 PE=1 SV=3	18.6709	7	8	7	316	35.709	7.18				1.593	1.24	1.77	0.711	3.216	1.14	0.671	0.576		281.9	500.6	448.9	349.5	294.4	498.8	200.3	252.8	906.6	439
O55098	Stk10	PE	Serine/threonine-protein kinase 10 OS=Mus musculus GN=Stk10 PE=1 SV=2	7.76398	8	9	8	966	111.836	7.15				1.409	1.025	1.381	0.873	2.32	0.684	0.46	0.473		317	434.4	446.7	324.9	292.1	437.9	276.6	300.2	735.5	634.9
O09106	Hdac1	PE	Histone deacetylase 1 OS=Mus musculus GN=Hdac1 PE=1 SV=1	24.0664	9	10	6	482	55.04	5.48				0.892	1.012	0.887	1.107	1.11	0.789	0.7	0.939		497.3	425	443.6	503.4	376.7	441.1	550.4	505.8	552.2	538.4
Q921M7	Fam49b	PE	Protein FAM49B OS=Mus musculus GN=Fam49b PE=1 SV=1	20.9877	5	6	4	324	36.753	6.06				1.366	1.087	1.359	0.98	1.847	1.014	0.628	0.592		324.1	446.4	442.6	352.1	276.7	440.3	317.6	260.6	598.4	440.3
Q3UHJ0	Aak1	PE	AP2-associated protein kinase 1 OS=Mus musculus GN=Aak1 PE=1 SV=2	17.5182	11	14	11	959	103.282	6.7				0.867	0.96	0.958	1.121	0.95	0.996	0.829	1.057		510.2	430.4	442.4	489.8	358.2	488.8	572.1	456.7	484.6	432.1
Q921F2	Tardbp	PE	TAR DNA-binding protein 43 OS=Mus musculus GN=Tardbp PE=1 SV=1	11.1111	4	6	4	414	44.519	6.7				1.258	1.278	1.472	1.229	2.038	1.059	1.04	0.88		351.6	475.9	442.3	449.2	467.6	517.6	432.1	395.6	716.6	449.6
Q9Z2I8	Suclg2	PE	Succinate--CoA ligase [GDP-forming] subunit beta, mitochondrial OS=Mus musculus GN=Suclg2 PE=1 SV=3	14.5497	6	7	6	433	46.811	7.02				0.983	1.231	1.283	0.818	1.504	0.985	0.778	0.872		449.7	499.3	442.2	553.6	394.3	576.8	367.9	442.2	676.5	506.8
Q9Z2U1	Psma5	PE	Proteasome subunit alpha type-5 OS=Mus musculus GN=Psma5 PE=1 SV=1	22.8216	5	6	5	241	26.394	4.79				0.95	1.005	1.088	0.859	1.174	1.139	0.875	1.058		464	477	441	466.1	366.3	504.8	398.7	442.9	545	418.6
Q8BHS3	Rbm22	PE	Pre-mRNA-splicing factor RBM22 OS=Mus musculus GN=Rbm22 PE=1 SV=1	20	8	11	8	420	46.865	8.54				0.911	0.881	1.011	0.983	1.037	0.884	3.39	1.022		478.8	390.8	436.2	422	1499.4	484.1	470.9	451.8	496.5	442.2
Q9CPU0	Glo1	PE	Lactoylglutathione lyase OS=Mus musculus GN=Glo1 PE=1 SV=3	25.5435	5	8	5	184	20.796	5.47				2.051	1.209	2.318	0.758	3.85	1.588	0.911	0.797		212.6	502.2	436	257.2	287.9	493	161.2	251.9	818.7	316.2
Q9CQ69	Uqcrq	PE	Cytochrome b-c1 complex subunit 8 OS=Mus musculus GN=Uqcrq PE=1 SV=3	48.7805	5	15	5	82	9.762	10.26				0.892	1.329	1.793	1.435	1.059	0.913	4.341	0.994		487.4	516.6	434.9	647.5	2457.9	873.8	699.3	562.9	516.3	566.2
Q9ESU6	Brd4	PE	Bromodomain-containing protein 4 OS=Mus musculus GN=Brd4 PE=1 SV=2	8.35714	13	16	8	1400	155.798	9.19				0.794	1.131	0.73	1.218	0.955	1.022	0.838	1.279		547.5	439.9	434.5	619.1	360.6	399.5	666.7	550.2	522.7	430.2
Q9CZ13	Uqcrc1	PE	Cytochrome b-c1 complex subunit 1, mitochondrial OS=Mus musculus GN=Uqcrc1 PE=1 SV=2	21.0417	8	9	8	480	52.819	6.21				1.092	1.063	1.248	0.832	2.038	0.779	0.593	0.664		396.7	408.1	433.2	421.8	310.5	495.2	330.2	347.5	808.4	523.6
P26043	Rdx	PE	Radixin OS=Mus musculus GN=Rdx PE=1 SV=3	27.7873	19	35	6	583	68.5	6.2				0.981	0.99	1.214	1.004	1.467	1.014	0.926	0.647		439.3	462.7	431.2	434.9	422.5	533.1	441.1	295	644.5	456.2
Q9JM76	Arpc3	PE	Actin-related protein 2/3 complex subunit 3 OS=Mus musculus GN=Arpc3 PE=1 SV=3	26.4045	6	8	6	178	20.511	8.59				0.853	0.635	0.765	0.64	0.935	0.87	0.545	0.542		504.2	426.6	430.2	320.2	267.2	385.7	322.6	265.7	471.6	490.4
P41241	Csk	PE	Tyrosine-protein kinase CSK OS=Mus musculus GN=Csk PE=1 SV=2	11.1111	6	6	6	450	50.684	7.06				1.404	1.082	1.418	0.913	2.409	0.911	0.647	0.576		306.4	449.1	430.1	331.5	319	434.3	279.6	283.7	738.1	492.7
ENSEMBL:ENSBTAP00000025008			(Bos taurus) hypothetical protein	8.76866	7	27	4	536	59.262	5.15		Y	Y	0.984	1.048	0.914	1.132	1.034	0.867	0.569	0.777		436.5	422.6	429.5	457.3	277.2	398.9	494	378.7	451.4	487.3
J3QNG0	Gm5424	PE	MCG15755 OS=Mus musculus GN=Gm5424 PE=3 SV=1	17.7184	7	8	7	412	46.555	8.22				1.144	1.141	1.118	0.825	1.957	0.782	0.637	0.548		375.2	430.3	429.4	428.1	350.4	419.7	309.5	301.6	734.3	550.1
P60843	Eif4a1	PE	Eukaryotic initiation factor 4A-I OS=Mus musculus GN=Eif4a1 PE=1 SV=1	23.6453	8	14	3	406	46.125	5.48				1.245	1.207	1.211	1.022	1.997	1.06	0.748	0.648		344.4	463.3	428.8	415.6	326.9	417.1	352.1	283.5	687.9	437.3
Q8CGF7	Tcerg1	PE	Transcription elongation regulator 1 OS=Mus musculus GN=Tcerg1 PE=1 SV=2	6.36364	8	9	8	1100	123.71	8.65				0.825	0.895	0.87	0.954	1.165	0.781	0.69	0.877		518.7	380.8	428.2	464.5	336.1	451.4	494.9	427.3	604	487.3
Q80XN0	Bdh1	PE	D-beta-hydroxybutyrate dehydrogenase, mitochondrial OS=Mus musculus GN=Bdh1 PE=1 SV=2	30.0292	9	13	9	343	38.274	9.01				0.788	1.179	0.932	1.092	0.887	0.779	1.389	0.919		541.2	429.2	426.2	638	765.2	504.7	591.2	506.1	480.2	550.8
Q3U7R1	Esyt1	PE	Extended synaptotagmin-1 OS=Mus musculus GN=Esyt1 PE=1 SV=2	17.8571	14	16	14	1092	121.478	5.95				0.778	1.039	1.151	0.916	1.241	0.899	0.725	0.607		547.5	560	426	568.6	451.5	630.3	501.4	378	679.6	622.9
Q9JLF6	Tgm1	PE	Protein-glutamine gamma-glutamyltransferase K OS=Mus musculus GN=Tgm1 PE=1 SV=2	5.64417	5	5	5	815	89.769	6.51				0.577	0.464	0.849	0.663	0.445	1.077	0.666	0.735		738.5	538.8	426	342.5	333.3	626.7	489.8	367.6	328.5	500.2
Q8R3K3	Ptcd2	PE	Pentatricopeptide repeat-containing protein 2, mitochondrial OS=Mus musculus GN=Ptcd2 PE=1 SV=1	12.336	6	7	6	381	43.815	9.04				0.919	0.982	0.903	1.357	0.926	0.925	0.661	1.429		461.2	402	423.9	453	287.1	416.3	626	620.8	427.3	434.3
P62821	Rab1A	PE	Ras-related protein Rab-1A OS=Mus musculus GN=Rab1A PE=1 SV=3	29.7561	6	8	2	205	22.663	6.21				1.125	1.237	1.385	1.189	1.667	1.043	0.845	0.748		375.5	480.6	422.5	464.7	389.3	520.2	446.6	344.5	626.2	460.8
P21958	Tap1	PE	Antigen peptide transporter 1 OS=Mus musculus GN=Tap1 PE=1 SV=3	7.87293	6	7	6	724	78.814	8.79				1.002	1.173	1.339	0.682	1.48	1.03	0.874	0.688		420.8	468.6	421.6	493.6	397.7	563.5	287	312.9	622.9	454.9
Q3SX09			TREMBL:Q3SX09 (Bos taurus) similar to HBG protein	23.3831	5	19	3	201	22.047	9.39		Y	Y	1.386	1.332	1.504	0.743	1.477	1.048	0.863	0.689		304	415.6	421.3	405.1	342.1	457.3	225.8	273.1	449.1	396.5
Q9D0R4	Ddx56	PE	Probable ATP-dependent RNA helicase DDX56 OS=Mus musculus GN=Ddx56 PE=2 SV=1	14.1026	7	7	7	546	61.174	9.17				0.87	1.104	0.959	1.421	1.003	0.83	2.127	1.156		482.6	369.3	420	532.8	947.1	462.8	685.8	514.6	484.1	445.2
Q9QYB5	Add3	PE	Gamma-adducin OS=Mus musculus GN=Add3 PE=1 SV=2	8.35694	5	5	5	706	78.728	5.95				0.877	0.818	0.892	0.812	1.036	0.778	0.811	0.764		477.2	410.9	418.3	390.4	428.4	425.7	387.7	403.5	494.5	528.2
P29341	Pabpc1	PE	Polyadenylate-binding protein 1 OS=Mus musculus GN=Pabpc1 PE=1 SV=2	14.6226	8	10	8	636	70.626	9.5				1.124	1.201	1.176	1.129	1.27	0.723	0.724	0.593		372	382	418.1	446.9	382.4	437.4	420	313	472.5	528.2
Q3UPF5	Zc3hav1	PE	Zinc finger CCCH-type antiviral protein 1 OS=Mus musculus GN=Zc3hav1 PE=1 SV=1	9.51374	9	10	9	946	106.619	8.27				0.678	0.666	0.684	0.662	0.852	0.922	1.434	0.921		614.8	452.8	416.9	409.5	704.5	420.5	406.8	452.6	523.7	491.2
Q9Z1Q9	Vars	PE	Valine--tRNA ligase OS=Mus musculus GN=Vars PE=1 SV=1	4.98812	6	6	6	1263	140.127	7.77				1.292	1.053	1.302	0.824	1.945	0.925	0.778	0.701		321.7	354.5	415.5	338.7	298.3	418.8	265	268.9	625.5	383.5
Q9CR62	Slc25a11	PE	Mitochondrial 2-oxoglutarate/malate carrier protein OS=Mus musculus GN=Slc25a11 PE=1 SV=3	26.1146	8	12	8	314	34.133	9.94				0.867	1.261	1.08	0.875	1.359	0.936	3.231	0.971		478.9	499.4	415.4	604.1	1724	517.1	419.2	518	650.7	533.5
P24369	Ppib	PE	Peptidyl-prolyl cis-trans isomerase B OS=Mus musculus GN=Ppib PE=1 SV=2	21.2963	5	5	4	216	23.699	9.55				1.542	1.362	2.038	1.011	2.86	1.084	1.188	0.589		268.3	462.3	413.6	365.5	506.6	546.7	271.3	251	767.3	426.4
P35980	Rpl18	PE	60S ribosomal protein L18 OS=Mus musculus GN=Rpl18 PE=1 SV=3	23.4043	4	6	4	188	21.631	11.78				1.157	0.951	1.14	0.906	0.986	0.995	0.917	2.041		357.5	343.2	413.5	340.2	316.1	407.6	324	703.8	352.7	344.8
P62889	Rpl30	PE	60S ribosomal protein L30 OS=Mus musculus GN=Rpl30 PE=1 SV=2	56.5217	6	7	6	115	12.776	9.63				1.648	0.944	1.548	1.08	1.612	1.105	1.887	0.779		246.7	319.2	406.5	232.8	545.1	382	266.5	225	397.8	288.9
P70372	Elavl1	PE	ELAV-like protein 1 OS=Mus musculus GN=Elavl1 PE=1 SV=2	14.4172	5	5	5	326	36.146	9.04				1.736	1.144	1.524	1.576	1.483	0.852	2.343	0.877		233.6	239.5	405.7	267.4	658.5	356	368.3	246.4	346.5	281
Q8CCF0	Prpf31	PE	U4/U6 small nuclear ribonucleoprotein Prp31 OS=Mus musculus GN=Prpf31 PE=1 SV=3	12.6253	7	7	7	499	55.395	5.67				1.136	1.05	1.047	1.207	1.373	0.942	1.127	0.886		355.7	357	404	373.5	427.2	372.3	429.2	335.9	488.3	379.2
Q6P542	Abcf1	PE	ATP-binding cassette sub-family F member 1 OS=Mus musculus GN=Abcf1 PE=1 SV=1	4.42055	4	6	4	837	94.887	6.51				1.238	1.146	0.96	1.014	1.291	1.174	0.891	0.987		324.2	369.5	401.5	371.4	280.3	311.2	328.8	310.4	418.7	314.6
Q8K310	Matr3	PE	Matrin-3 OS=Mus musculus GN=Matr3 PE=1 SV=1	8.98345	7	7	7	846	94.572	6.25				1.445	1.28	1.802	1.978	1.668	0.544	1.885	0.723		277.9	230.6	401.4	355.7	798.2	500.7	549.6	306.2	463.5	423.5
P01831	Thy1	PE	Thy-1 membrane glycoprotein OS=Mus musculus GN=Thy1 PE=1 SV=1	31.4815	4	8	4	162	18.069	8.97				0.976	1.031	0.74	0.822	0.667	1.054	0.832	0.935		411	334.9	401	423.7	264.3	303.9	337.7	297.3	274	317.8
P55194	Sh3bp1	PE	SH3 domain-binding protein 1 OS=Mus musculus GN=Sh3bp1 PE=1 SV=2	11.98	7	7	7	601	65.244	5.68				1.101	0.909	1.187	0.759	1.38	1.102	0.876	1.036		364.3	380.4	401	331.3	302.5	432.2	276.4	357.8	502.5	345.2
Q99JI6	Rap1b	PE	Ras-related protein Rap-1b OS=Mus musculus GN=Rap1b PE=1 SV=2	39.6739	7	10	7	184	20.812	5.78				1.173	1.306	1.339	0.871	2.097	1.126	0.787	0.557		341.4	536.8	400.3	445.9	375.2	457	297.5	265.6	715.9	476.9
Q0VG62	1	SV	Uncharacterized protein C8orf59 homolog OS=Mus musculus PE=1 SV=1	22.3022	4	5	4	139	15.8	10.78				0.707	1.071	0.962	1.613	1.004	0.818	1.254	1.344		565.6	420.5	399.9	605.9	644.5	544.2	912.3	690.9	568.1	514.1
P28063	Psmb8	PE	Proteasome subunit beta type-8 OS=Mus musculus GN=Psmb8 PE=1 SV=2	15.5797	4	5	4	276	30.241	6.68				1.21	0.979	1.24	0.943	1.665	1.006	0.708	0.821		330.5	379.3	399.8	323.5	266.7	409.9	311.6	309.3	550.3	376.8
Q8VDM4	Psmd2	PE	26S proteasome non-ATPase regulatory subunit 2 OS=Mus musculus GN=Psmd2 PE=1 SV=1	6.82819	6	6	6	908	100.139	5.17				0.728	0.771	0.67	0.788	0.845	0.855	0.727	0.854		546.7	395.7	397.9	421.6	336.5	366.2	430.7	395.3	462.1	463
D0QMC3	Mndal	PE	Myeloid cell nuclear differentiation antigen-like protein OS=Mus musculus GN=Mndal PE=1 SV=1	12.4535	7	8	7	538	60.488	9.28				1.063	0.952	0.927	1.035	1.494	0.96	1.549	1.081		374.4	337.5	397.8	356.4	544.5	347.2	387.6	380	559.3	351.5
Q9CQI7	Snrpb2	PE	U2 small nuclear ribonucleoprotein B'' OS=Mus musculus GN=Snrpb2 PE=1 SV=1	30.2222	6	7	5	225	25.307	9.72				1.158	1.172	1.255	1.318	1.483	0.882	0.999	0.872		343	363.8	397.4	401.9	412.1	430.5	452.1	359.6	508.8	412.6
Q91YT0	Ndufv1	PE	NADH dehydrogenase [ubiquinone] flavoprotein 1, mitochondrial OS=Mus musculus GN=Ndufv1 PE=1 SV=1	10.3448	5	7	5	464	50.802	8.21				0.998	1.318	1.084	1.093	1.266	1.046	0.877	0.851		398	430.2	397.4	524.5	360.9	431.4	435.1	350.3	503.8	411.4
Q60520	Sin3a	PE	Paired amphipathic helix protein Sin3a OS=Mus musculus GN=Sin3a PE=1 SV=3	3.53218	5	6	5	1274	144.998	7.25				1	1.014	0.859	1.193	1.227	0.694	0.597	0.868		394.6	313	394.5	400.1	269.2	338.9	470.7	391.6	484.3	450.9
E9Q555	Rnf213	PE	E3 ubiquitin-protein ligase RNF213 OS=Mus musculus GN=Rnf213 PE=1 SV=2	1.24224	7	7	7	5152	584.411	6.8				0.809	1.149	1.095	0.826	1.024	0.853	0.751	1.052		487.2	420.8	394	559.8	370.1	533.4	402.4	518.6	498.7	493.1
Q9CZN7	Shmt2	PE	Serine hydroxymethyltransferase OS=Mus musculus GN=Shmt2 PE=1 SV=1	15.6746	7	8	6	504	55.724	8.47				0.903	1.017	0.961	1.03	1.303	1.065	0.708	0.994		434.9	422.5	392.6	442.5	281.2	418	447.9	394.7	566.6	396.9
Q924C1	Xpo5	PE	Exportin-5 OS=Mus musculus GN=Xpo5 PE=1 SV=1	5.1495	6	7	6	1204	136.883	5.82				0.784	1.384	1.19	0.588	0.588	0.892	0.721	0.513		500.6	492	392.3	693	397.5	595.9	294.4	283.1	294.4	551.5
Q6P2B1	Tnpo3	PE	Transportin-3 OS=Mus musculus GN=Tnpo3 PE=1 SV=1	14.8429	11	11	11	923	104.103	5.57				0.62	0.94	0.98	0.501	0.466	1.082	0.766	0.675		628.3	484.2	389.5	590.7	342.6	615.7	314.9	301.9	292.7	447.6
Q9R1T4	Sept6	PE	Septin-6 OS=Mus musculus GN=Sept6 PE=1 SV=4	13.1336	6	8	6	434	49.588	6.43				1.208	1.212	1.379	1.06	1.814	0.999	0.781	0.768		322.1	400.2	389.1	390.5	312.8	444.1	341.4	307.7	584.4	400.7
Q99LG2	Tnpo2	PE	Transportin-2 OS=Mus musculus GN=Tnpo2 PE=1 SV=1	21.4205	17	39	9	887	100.391	4.98				0.675	1.415	1.021	0.614	0.445	0.928	0.587	0.548		574.3	475.9	387.8	812.8	300.8	586.6	352.7	280.7	255.8	512.7
Q8R1B4	Eif3c	PE	Eukaryotic translation initiation factor 3 subunit C OS=Mus musculus GN=Eif3c PE=1 SV=1	5.81778	5	5	5	911	105.465	5.78				1.077	1.038	0.94	1.03	1.503	0.891	0.664	0.766		359.6	368.1	387.2	373.1	274.3	338.2	370.4	316.2	540.6	413
Q8BTX9	Hsdl1	PE	Inactive hydroxysteroid dehydrogenase-like protein 1 OS=Mus musculus GN=Hsdl1 PE=1 SV=1	12.7273	4	5	4	330	36.844	8.48				1.085	1.236	1.266	0.891	1.056	1.084	1.13	0.786		354.8	418.2	385	438.3	435.9	449	316.1	303.4	374.6	385.9
Q9CYL5	Glipr2	PE	Golgi-associated plant pathogenesis-related protein 1 OS=Mus musculus GN=Glipr2 PE=1 SV=3	19.4805	3	8	3	154	17.08	9.51				0.78	0.845	0.879	0.85	0.934	0.564	1.24	0.639		491.2	335.1	383	415.3	737.3	431.7	417.5	380.1	458.7	594.7
O08810	Eftud2	PE	116 kDa U5 small nuclear ribonucleoprotein component OS=Mus musculus GN=Eftud2 PE=1 SV=1	9.2688	8	9	7	971	109.291	5				1.281	1.457	1.526	1.673	1.764	0.836	1.032	1.085		298.7	304.9	382.7	435.4	376	455.8	499.7	395.6	527	364.5
P61205	Arf3	PE	ADP-ribosylation factor 3 OS=Mus musculus GN=Arf3 PE=2 SV=2	35.9116	5	9	2	181	20.588	7.43				1.173	1.369	1.541	0.809	2.138	1.015	0.872	0.67		326	438.3	382.5	446.2	376.4	502.3	263.9	289.1	697.1	431.8
Q9CQQ7	Atp5f1	PE	ATP synthase F(0) complex subunit B1, mitochondrial OS=Mus musculus GN=Atp5f1 PE=1 SV=1	15.2344	5	8	5	256	28.93	9.06				1.141	1.111	1.336	0.719	2.126	0.849	0.789	0.557		332.2	418.6	379	369.1	389.1	443.9	238.8	274.8	706.2	493.2
Q922Q4	Pycr2	PE	Pyrroline-5-carboxylate reductase 2 OS=Mus musculus GN=Pycr2 PE=1 SV=1	17.1875	5	8	5	320	33.638	7.77				0.775	0.891	0.816	1.14	0.764	0.822	0.686	1.019		488.7	343.9	378.6	435.6	287	398.7	557.3	426.4	373.4	418.2
Q9D554	Sf3a3	PE	Splicing factor 3A subunit 3 OS=Mus musculus GN=Sf3a3 PE=1 SV=2	8.38323	4	5	4	501	58.805	5.34				0.887	0.958	0.895	0.982	1.008	0.771	0.841	0.79		427	305.8	378.5	409.1	333.7	382	419.2	313.5	430.4	396.6
P42232	Stat5b	PE	Signal transducer and activator of transcription 5B OS=Mus musculus GN=Stat5b PE=1 SV=1	9.92366	8	9	7	786	89.946	6.05				0.935	0.89	1.076	0.707	1.658	0.987	0.678	0.656		404.1	418.3	377.8	359.6	287.5	434.9	285.7	278.1	669.9	423.7
O70251	Eef1b	PE	Elongation factor 1-beta OS=Mus musculus GN=Eef1b PE=1 SV=5	19.5556	4	4	4	225	24.678	4.69				1.421	1.076	1.41	1.116	1.932	0.934	1.111	0.715		265.8	350.1	377.7	285.9	416.4	374.8	296.6	267.9	513.6	374.8
P08228	Sod1	PE	Superoxide dismutase [Cu-Zn] OS=Mus musculus GN=Sod1 PE=1 SV=2	41.5584	6	7	6	154	15.933	6.51				1.105	0.946	1.388	0.888	1.654	0.86	0.798	0.724		340.9	418.4	376.6	322.4	388.3	473.2	302.7	352.1	563.8	486.6
P11835	Itgb2	PE	Integrin beta-2 OS=Mus musculus GN=Itgb2 PE=1 SV=2	8.69001	7	7	7	771	84.97	7.12				1.154	1.058	1.273	1.029	2.108	0.778	0.607	0.542		323.9	366.2	373.9	342.8	285.6	412.4	333.2	255.1	682.7	470.5
Q3SX14			TREMBL:Q3SX14 (Bos taurus) Similar to Gelsolin	8.70679	7	8	4	781	85.634	6.21		Y	Y	0.755	1.185	2.392	4.132	1.447	0.931	0.941	0.705		494.5	461.9	373.3	586	466.5	1182.7	2043.3	349.6	715.5	495.9
P62855	Rps26	PE	40S ribosomal protein S26 OS=Mus musculus GN=Rps26 PE=1 SV=3	26.9565	3	7	3	115	13.007	11				1.09	1.945	1.594	1.284	1.597	1.248	4.711	2.041		342.1	343	373	665.5	1295	545.3	439.4	561.1	546.5	274.9
Q8VDI1	Epsti1	PE	Epithelial-stromal interaction protein 1 OS=Mus musculus GN=Epsti1 PE=1 SV=2	26.7516	11	14	11	314	36.077	10.01				0.766	0.921	1.014	0.862	0.857	0.667	3.82	0.68		483.3	410.5	370.4	445	2350.6	490.2	416.5	418.3	414.2	615.4
Q9CY66	Gar1	PE	H/ACA ribonucleoprotein complex subunit 1 OS=Mus musculus GN=Gar1 PE=1 SV=1	16.8831	5	5	5	231	23.46	11.02				1.084	1.118	1.146	1.41	1.202	0.964	3.644	1.063		341.6	353.8	370.4	381.9	1337	391.3	481.7	390.2	410.7	366.9
P32067	Ssb	PE	Lupus La protein homolog OS=Mus musculus GN=Ssb PE=1 SV=1	16.1446	6	7	6	415	47.727	9.77				0.747	0.886	0.81	0.566	1.101	0.884	0.979	0.708		495.3	403.2	370.2	439	446.5	401.2	280.3	322.6	545.2	455.9
Q9QUK9	Try5	PE	MCG15083 OS=Mus musculus GN=Try5 PE=1 SV=1	8.13008	1	5	1	246	26.26	5.3				0.58	0.862	0.67	0.976	0.502	0.787	0.573	1.134		638.6	343.6	370.1	550.2	250.1	428.1	623.2	495.5	320.4	436.7
Q91ZE0	Tmlhe	PE	Trimethyllysine dioxygenase, mitochondrial OS=Mus musculus GN=Tmlhe PE=1 SV=2	12.3515	5	5	5	421	49.578	8.25				0.993	1.198	0.969	1.276	1.001	1.011	0.909	1.202		372.5	344.4	369.9	446.2	309.7	361.1	475.4	409.7	373	340.7
P99026	Psmb4	PE	Proteasome subunit beta type-4 OS=Mus musculus GN=Psmb4 PE=1 SV=1	12.8788	3	6	3	264	29.097	5.64				0.687	0.557	0.744	0.617	1.036	1.031	0.659	0.947		533.4	414.6	366.3	297.1	265.3	396.7	329.2	380.9	552.5	402.3
Q791V5	Mtch2	PE	Mitochondrial carrier homolog 2 OS=Mus musculus GN=Mtch2 PE=1 SV=1	10.5611	4	6	4	303	33.477	8.25				1.091	1.104	1.244	0.752	1.666	0.961	0.971	0.75		334	387.3	364.5	368.7	391.2	415.6	251.1	302.1	556.4	402.9
Q8BK64	Ahsa1	PE	Activator of 90 kDa heat shock protein ATPase homolog 1 OS=Mus musculus GN=Ahsa1 PE=1 SV=2	15.3846	5	5	5	338	38.093	5.53				1.136	1.205	1.073	1.174	1.815	0.926	0.581	0.885		320.2	364.1	363.6	385.9	228.3	343.6	375.8	348.1	581.3	393.2
Q9R1P3	Psmb2	PE	Proteasome subunit beta type-2 OS=Mus musculus GN=Psmb2 PE=1 SV=1	20.398	4	4	4	201	22.892	7.02				0.861	0.83	0.862	1.246	1.208	0.817	0.477	0.861		421.3	353.7	362.9	349.8	206.5	363.1	524.9	372.7	508.9	433
Q62189	Snrpa	PE	U1 small nuclear ribonucleoprotein A OS=Mus musculus GN=Snrpa PE=1 SV=3	12.892	4	7	3	287	31.814	9.8				1.084	1.12	1.153	0.972	1.373	1.037	0.898	0.837		334.5	392.8	362.6	374.5	340.3	385.5	325.3	316.9	459.3	378.8
Q3TZZ7	Esyt2	PE	Extended synaptotagmin-2 OS=Mus musculus GN=Esyt2 PE=1 SV=1	9.34911	7	7	7	845	94.081	7.75				0.958	1.08	1.282	0.726	1.164	1.194	0.958	0.929		378.3	419.7	362.4	408.4	336.8	484.8	274.5	326.6	440.2	351.6
Q60749	Khdrbs1	PE	KH domain-containing, RNA-binding, signal transduction-associated protein 1 OS=Mus musculus GN=Khdrbs1 PE=1 SV=2	11.5124	6	8	6	443	48.34	8.72				0.994	0.901	1.007	0.767	1.605	1.012	2.178	0.729		363.9	392.1	361.5	328	843.6	366.5	279.1	282.2	583.9	387.3
O70194	Eif3d	PE	Eukaryotic translation initiation factor 3 subunit D OS=Mus musculus GN=Eif3d PE=1 SV=2	6.93431	4	4	4	548	63.948	6.05				1.286	0.909	1.527	1.086	1.76	1.108	1.45	1.137		281.2	338.2	361.5	255.6	442.4	429.3	305.5	347	494.9	305.2
Q9ESX5	Dkc1	PE	H/ACA ribonucleoprotein complex subunit 4 OS=Mus musculus GN=Dkc1 PE=1 SV=4	18.8605	9	12	9	509	57.365	9.28				1.119	1.381	1.21	1.305	1.528	1.067	1.823	1.083		322.1	376.6	360.5	444.9	643.1	389.8	420.3	382.2	492.3	352.8
Q9WVA3	Bub3	PE	Mitotic checkpoint protein BUB3 OS=Mus musculus GN=Bub3 PE=1 SV=2	15.0307	5	7	5	326	36.931	6.84				1.218	1.131	1.303	1.216	1.733	0.88	0.735	0.801		293.3	360	357.4	331.7	300.5	382.1	356.7	327.6	508.5	408.9
Q6NZJ6	Eif4g1	PE	Eukaryotic translation initiation factor 4 gamma 1 OS=Mus musculus GN=Eif4g1 PE=1 SV=1	4.4375	6	6	4	1600	175.967	5.4				1.122	1.308	1.347	1.284	1.559	0.78	0.865	0.868		316	288.6	354.7	413.4	319.7	425.8	405.7	321	492.7	369.8
Q8JZU2	Slc25a1	PE	Tricarboxylate transport protein, mitochondrial OS=Mus musculus GN=Slc25a1 PE=1 SV=1	18.9711	6	10	6	311	33.91	9.89				0.823	1.192	0.973	0.96	0.879	0.992	3.2	1.013		429.3	405.6	353.2	511.8	1308.1	417.9	412.2	414.2	377.5	408.8
Q03267	Ikzf1	PE	DNA-binding protein Ikaros OS=Mus musculus GN=Ikzf1 PE=1 SV=2	6.5764	4	5	4	517	57.299	6.52				1.013	1.075	0.903	0.881	1.263	0.83	0.795	0.833		348.4	314.3	353.1	374.5	301	314.6	307	315.6	439.9	378.8
Q5SUA5	Myo1g	PE	Unconventional myosin-Ig OS=Mus musculus GN=Myo1g PE=1 SV=1	9.66797	9	9	9	1024	117.153	8.59				0.917	1.018	1.066	0.989	0.736	0.825	0.937	0.954		384.8	293.8	352.9	391.7	333.7	410.1	380.5	339.8	283.3	356.1
P97384	Anxa11	PE	Annexin A11 OS=Mus musculus GN=Anxa11 PE=1 SV=2	16.1034	7	8	7	503	54.045	7.66				1.052	0.934	1.086	0.994	1.558	0.757	0.631	0.666		334	302.5	351.5	312.1	252.1	362.8	332.1	266.2	520.3	399.5
P62137	Ppp1ca	PE	Serine/threonine-protein phosphatase PP1-alpha catalytic subunit OS=Mus musculus GN=Ppp1ca PE=1 SV=1	32.7273	8	9	8	330	37.516	6.33				1.184	1.11	1.19	1.192	1.787	1.087	1.006	1.042		296.8	339.9	351.2	329.3	314.7	353.1	353.6	325.8	530.4	312.8
O54734	Ddost	PE	Dolichyl-diphosphooligosaccharide--protein glycosyltransferase 48 kDa subunit OS=Mus musculus GN=Ddost PE=1 SV=2	8.61678	4	6	4	441	48.997	5.83				1.521	0.922	1.018	0.789	1.55	0.661	0.565	0.597		230.3	189.2	350.2	212.4	161.8	234.5	181.7	170.9	357	286.4
Q9CY27	Tecr	PE	Very-long-chain enoyl-CoA reductase OS=Mus musculus GN=Tecr PE=1 SV=1	24.3506	8	11	8	308	36.067	9.55				1.099	2.325	1.451	1.527	1.471	1.216	5.256	1.112		318.6	433	350.1	740.7	1871.8	462.4	486.7	395.9	468.9	356.2
P16330	Cnp	PE	2',3'-cyclic-nucleotide 3'-phosphodiesterase OS=Mus musculus GN=Cnp PE=1 SV=3	16.1905	7	7	7	420	47.094	8.97				0.965	1.032	1.116	1.213	1.369	0.979	1.42	1.032		362.3	330.5	349.6	373.9	479.4	404.2	439.4	348.1	495.8	337.5
Q8R574	Prpsap2	PE	Phosphoribosyl pyrophosphate synthase-associated protein 2 OS=Mus musculus GN=Prpsap2 PE=1 SV=1	8.13008	3	4	3	369	40.854	7.17				1.439	1.009	1.668	1.137	2.44	1.003	1.386	0.791		242.8	371.2	349.5	244.9	512.8	404.9	276	292.7	592.3	370
O35350	Capn1	PE	Calpain-1 catalytic subunit OS=Mus musculus GN=Capn1 PE=1 SV=1	11.2202	8	8	7	713	82.054	5.87				1.126	0.986	1.19	1.048	1.604	0.953	0.987	0.719		309.9	353.8	349	305.7	366.4	368.7	324.7	266.7	497.1	371.2
P20108	Prdx3	PE	Thioredoxin-dependent peroxide reductase, mitochondrial OS=Mus musculus GN=Prdx3 PE=1 SV=1	20.2335	5	8	5	257	28.109	7.58				0.888	1.096	1.107	0.903	1.112	0.908	0.755	0.924		393	339	348.9	430.8	281.7	435	354.9	345	437.2	373.3
Q9R0P6	Sec11a	PE	Signal peptidase complex catalytic subunit SEC11A OS=Mus musculus GN=Sec11a PE=1 SV=1	22.905	5	7	5	179	20.613	9.33				0.876	1.031	0.888	0.81	1.024	0.788	0.536	0.616		397.6	378.5	348.1	410.1	257.2	353.1	321.9	295.9	407.1	480.1
P10107	Anxa1	PE	Annexin A1 OS=Mus musculus GN=Anxa1 PE=1 SV=2	14.4509	5	5	4	346	38.71	7.37				1.418	1.288	2.274	3.28	1.351	1.328	0.855	0.908		244.5	394.7	346.8	314.9	254	556	802	270	330.3	297.2
Q99KK2	Cmas	PE	N-acylneuraminate cytidylyltransferase OS=Mus musculus GN=Cmas PE=1 SV=2	15.2778	6	6	6	432	48.028	8.1				1.198	1.202	1.197	1.256	1.706	1.196	0.907	1.007		289.2	384.1	346.5	347.6	291.4	346.1	363.2	323.5	493.4	321.2
P97371	Psme1	PE	Proteasome activator complex subunit 1 OS=Mus musculus GN=Psme1 PE=1 SV=2	33.7349	7	8	7	249	28.655	5.97				1.279	1.342	1.261	0.731	2.116	0.948	0.626	0.538		270.7	381.5	346.2	363.3	252	341.3	197.9	216.7	572.8	402.5
Q9R1P1	Psmb3	PE	Proteasome subunit beta type-3 OS=Mus musculus GN=Psmb3 PE=1 SV=1	19.0244	3	5	3	205	22.949	6.55				0.953	0.935	1.058	0.916	1.266	1.015	0.688	0.883		361.8	396.9	344.7	338.4	268.9	382.7	331.5	345.3	458	390.9
P22646	Cd3e	PE	T-cell surface glycoprotein CD3 epsilon chain OS=Mus musculus GN=Cd3e PE=1 SV=2	8.46561	2	2	2	189	21.38	7.12				2.956	0.695	1.225	1.284	1.374	0.757	0.445	0.513		116.3	141.1	344	80.9	83	142.5	149.3	95.7	159.8	186.5
Q9CT10	Ranbp3	PE	Ran-binding protein 3 OS=Mus musculus GN=Ranbp3 PE=1 SV=2	8.9613	4	4	4	491	52.541	5.12				0.914	0.858	0.866	1.097	1.057	0.822	0.655	0.825		376.2	303.4	343.7	322.9	241.7	325.7	412.7	304.6	397.8	369
Q9DBR7	Ppp1r12a	PE	Protein phosphatase 1 regulatory subunit 12A OS=Mus musculus GN=Ppp1r12a PE=1 SV=2	5.05345	5	5	5	1029	114.927	5.49				1.103	1.002	0.996	0.925	1.589	0.885	0.758	0.919		311.5	294.3	343.7	312.3	251.9	310.2	288	305.7	494.9	332.4
Q8BVK9	Sp110	PE	Sp110 nuclear body protein OS=Mus musculus GN=Sp110 PE=1 SV=1	15.9551	7	8	7	445	50.109	9.86				1.155	1.418	1.565	1.026	1.622	0.827	2.559	0.843		296.8	316.6	342.8	420.8	979.4	464.6	304.6	322.6	481.5	382.8
O70400	Pdlim1	PE	PDZ and LIM domain protein 1 OS=Mus musculus GN=Pdlim1 PE=1 SV=4	15.5963	4	5	4	327	35.752	6.84				1.267	1.322	1.253	1.145	1.904	0.988	0.668	0.703		270.6	356	342.8	357.8	240.6	339.1	309.9	253.6	515.3	360.4
P08113	Hsp90b1	PE	Endoplasmin OS=Mus musculus GN=Hsp90b1 PE=1 SV=2	10.4738	8	14	6	802	92.418	4.82				1.352	1.089	1.612	1.247	2.83	0.96	0.647	0.605		251.1	360.9	339.3	273.4	243.4	404.7	313	227.5	710.6	375.9
O55029	Copb2	PE	Coatomer subunit beta' OS=Mus musculus GN=Copb2 PE=1 SV=2	3.64641	4	4	4	905	102.384	5.3				0.932	0.943	0.958	1.29	1.416	0.873	0.647	0.846		363.2	322.9	338.6	342.4	239.6	347.9	468.4	313.2	514.3	370
Q8CI94	Pygb	PE	Glycogen phosphorylase, brain form OS=Mus musculus GN=Pygb PE=1 SV=3	11.1507	8	8	8	843	96.668	6.73				1.036	1.349	1.254	1.219	1.626	1.214	0.875	0.967		326.3	445.1	338	440.1	321.1	409	397.9	354.8	530.6	366.7
Q99LX5	Mmtag2	PE	Multiple myeloma tumor-associated protein 2 homolog OS=Mus musculus GN=Mmtag2 PE=2 SV=1	22.6923	5	8	5	260	29.281	9.86				0.918	1.072	0.838	1.114	0.875	0.817	0.991	0.89		367.7	341.1	337.5	394.2	413.8	308	409.7	371.7	321.5	417.5
Q9DCL9	Paics	PE	Multifunctional protein ADE2 OS=Mus musculus GN=Paics PE=1 SV=4	10.8235	5	7	5	425	46.976	7.23				0.827	0.959	0.832	0.923	1.116	0.672	0.492	0.569		407.5	399.3	337.2	391	292.4	339.1	376.3	338.1	455	594.5
Q8K019	Bclaf1	PE	Bcl-2-associated transcription factor 1 OS=Mus musculus GN=Bclaf1 PE=1 SV=2	8.5963	8	9	8	919	105.939	9.99				1.143	1.214	1.059	1.004	1.473	1.003	1.604	1.591		295	248.5	337.2	358.1	397.3	312.4	296.1	394.2	434.6	247.7
P14115	Rpl27a	PE	60S ribosomal protein L27a OS=Mus musculus GN=Rpl27a PE=1 SV=5	31.7568	6	10	6	148	16.595	11.12				0.901	1.238	1.114	0.846	0.952	1.553	2.275	1.391		371.8	470.8	335	460.3	689.8	414.2	314.4	421.9	354.1	303.3
Q99MN1	Kars	PE	Lysine--tRNA ligase OS=Mus musculus GN=Kars PE=1 SV=1	5.21008	4	5	4	595	67.796	5.94				1.433	1.177	1.296	1.294	2.197	0.879	0.567	0.643		233.7	278.8	335	275.1	180	302.8	302.4	204.1	513.4	317.3
Q9DBJ1	Pgam1	PE	Phosphoglycerate mutase 1 OS=Mus musculus GN=Pgam1 PE=1 SV=3	17.3228	5	6	5	254	28.814	7.18				0.874	0.985	1.047	0.84	1.233	0.791	0.535	0.489		383.4	405.6	335	377.8	274.5	401.3	322.1	251	472.6	512.9
Q8CHY6	Gatad2a	PE	Transcriptional repressor p66 alpha OS=Mus musculus GN=Gatad2a PE=1 SV=2	10.8108	7	9	6	629	67.292	9.89				0.866	0.894	0.676	1.071	0.976	0.778	0.659	0.988		386.6	268.1	334.7	345.4	226.9	261.2	414.1	340.2	377.2	344.5
P23116	Eif3a	PE	Eukaryotic translation initiation factor 3 subunit A OS=Mus musculus GN=Eif3a PE=1 SV=5	6.10119	9	9	9	1344	161.838	6.77				0.994	1.296	1.089	1.084	1.63	1.045	0.896	1.013		336	374.9	334.1	435.6	321.3	365.9	364.4	363.4	547.8	358.8
Q8BGW0	Themis	PE	Protein THEMIS OS=Mus musculus GN=Themis PE=1 SV=1	5.81761	4	4	4	636	72.734	6.13				1.154	1.114	1.419	1.04	1.778	0.847	0.7	0.821		288.9	313.8	333.3	321.8	259.4	410	300.3	304.2	513.7	370.6
P62196	Psmc5	PE	26S protease regulatory subunit 8 OS=Mus musculus GN=Psmc5 PE=1 SV=1	15.7635	6	7	5	406	45.597	7.55				1.147	1.102	1.021	1.238	1.388	0.992	0.754	0.873		290.5	295.4	333.2	320.2	224.6	296.5	359.6	259.9	403.1	297.9
Q9JLN9	Mtor	PE	Serine/threonine-protein kinase mTOR OS=Mus musculus GN=Mtor PE=1 SV=2	2.04002	6	6	6	2549	288.605	7.17				0.74	1.191	1.165	0.664	0.602	0.843	0.794	0.657		448.9	338.6	332.4	534.8	318.6	523	298.1	263.6	270.3	401.5
P81122	Irs2	PE	Insulin receptor substrate 2 OS=Mus musculus GN=Irs2 PE=1 SV=2	6.28312	7	7	7	1321	136.678	8.69				3.26	0.865	3.26	0.234	3.967	2.863	2.398	5.06		101.5	186.2	330.7	87.7	156	330.8	23.7	329.1	402.5	65
Q9Z2N8	Actl6a	PE	Actin-like protein 6A OS=Mus musculus GN=Actl6a PE=1 SV=2	17.7156	6	8	6	429	47.417	5.6				0.98	1.057	0.931	1.309	0.893	1.279	1.031	1.018		336.4	363.9	329.5	355.4	293.3	313.1	440.2	289.6	300.5	284.4
Q8BHN3	Ganab	PE	Neutral alpha-glucosidase AB OS=Mus musculus GN=Ganab PE=1 SV=1	3.70763	4	5	4	944	106.844	6.06				1.362	1.017	1.336	0.882	2.438	0.817	0.488	0.525		241.6	292	328.9	245.7	174.5	322.8	213	187.8	588.9	357.5
P23506	Pcmt1	PE	Protein-L-isoaspartate(D-aspartate) O-methyltransferase OS=Mus musculus GN=Pcmt1 PE=1 SV=3	16.7401	4	5	4	227	24.619	7.65				0.818	0.939	1.013	1.127	1.034	1.076	1.976	1.172		401.6	359.2	328.5	377.2	659.8	406.8	452.6	391.4	415.4	333.9
Q9JIK5	Ddx21	PE	Nucleolar RNA helicase 2 OS=Mus musculus GN=Ddx21 PE=1 SV=3	5.17039	5	6	5	851	93.493	9.11				1.318	1.347	1.542	1.056	1.83	1.109	1.854	1.119		249.3	268.9	328.5	335.6	449.6	384.4	263.1	271.5	456	242.5
P61255	Rpl26	PE	60S ribosomal protein L26 OS=Mus musculus GN=Rpl26 PE=1 SV=1	22.069	4	5	4	145	17.248	10.55				1.64	1.458	1.851	1.269	2.272	1.497	4.669	1.212		200	306.2	328.1	291.6	955.3	370.1	253.8	247.9	454.3	204.6
Q9WVJ2	Psmd13	PE	26S proteasome non-ATPase regulatory subunit 13 OS=Mus musculus GN=Psmd13 PE=1 SV=1	7.18085	3	5	3	376	42.782	5.71				1.286	1.113	1.264	1.073	1.7	1.07	0.803	1.183		255.1	278.8	328	283.9	209.4	322.5	273.6	308.3	433.6	260.6
Q6P5B0	Rrp12	PE	RRP12-like protein OS=Mus musculus GN=Rrp12 PE=1 SV=1	6.17761	8	8	8	1295	143.041	8.91				0.86	1.278	1.227	0.845	0.81	0.556	0.637	0.491		380.8	369.8	327.5	486.7	423.3	467.2	321.9	326.3	308.3	664.8
P70404	Idh3g	PE	Isocitrate dehydrogenase [NAD] subunit gamma 1, mitochondrial OS=Mus musculus GN=Idh3g PE=1 SV=1	8.90585	4	4	4	393	42.758	9.01				1.085	1.22	1.069	1.183	1.413	0.798	0.691	0.822		301.3	282.5	326.9	367.6	244.5	322.1	356.6	291.1	425.8	353.9
Q80XP8	Fam76b	PE	Protein FAM76B OS=Mus musculus GN=Fam76b PE=1 SV=1	17.1091	7	7	7	339	38.531	9.29				0.947	1.046	1.044	1.573	1.1	0.787	4.19	0.979		344.3	322.2	326.1	360.2	1715.4	359.5	541.6	400.8	378.7	409.4
P54775	Psmc4	PE	26S protease regulatory subunit 6B OS=Mus musculus GN=Psmc4 PE=1 SV=2	14.8325	5	7	4	418	47.379	5.21				1.322	1.013	1.18	1.431	1.584	0.959	0.7	0.881		245.5	274.3	324.5	248.8	200.2	289.8	351.4	251.9	388.8	285.9
P63005	Pafah1b1	PE	Platelet-activating factor acetylhydrolase IB subunit alpha OS=Mus musculus GN=Pafah1b1 PE=1 SV=2	5.60976	3	3	3	410	46.64	7.37				1.334	1.213	1.292	1.038	2.279	1.062	0.651	0.644		241.7	375.3	322.5	293.3	230.2	312.3	251	227.4	550.9	353.4
Q9EST1	Gsdma	PE	Gasdermin-A OS=Mus musculus GN=Gsdma PE=2 SV=1	8.52018	5	11	5	446	49.562	5.57				0.423	0.405	1.388	0.557	0.697	1.187	0.921	1.66		763	496	322.4	309.3	385.1	1058.9	425.2	693.6	531.6	418
Q62425	Ndufa4	PE	Cytochrome c oxidase subunit NDUFA4 OS=Mus musculus GN=Ndufa4 PE=1 SV=2	45.122	4	6	4	82	9.321	9.52				0.98	1.147	1.208	1.255	1.343	1.027	4.102	0.869		328.7	349.6	322.2	377	1396.8	397.2	412.5	296.1	441.6	340.5
Q4VA53	Pds5b	PE	Sister chromatid cohesion protein PDS5 homolog B OS=Mus musculus GN=Pds5b PE=1 SV=1	7.46888	11	12	6	1446	164.315	8.5				0.836	1.677	1.642	0.644	1.044	1.086	1.09	0.793		385.1	367.8	322.1	645.8	369.1	632.5	248	268.5	402	338.5
P61358	Rpl27	PE	60S ribosomal protein L27 OS=Mus musculus GN=Rpl27 PE=1 SV=2	36.0294	4	6	4	136	15.788	10.56				1.544	1.455	1.859	1.043	1.59	1.468	2.016	1.128		207.5	300.5	320.3	301.9	412.9	385.8	216.4	231	329.9	204.8
Q8R4E9	Cdt1	PE	DNA replication factor Cdt1 OS=Mus musculus GN=Cdt1 PE=1 SV=1	8.07899	5	6	5	557	61.471	9.57				0.845	1.139	0.976	1.185	1.023	0.948	4.44	1.115		377.3	336.2	318.8	429.6	1574.4	368.1	447	395.4	386.1	354.6
P61164	Actr1a	PE	Alpha-centractin OS=Mus musculus GN=Actr1a PE=1 SV=1	6.91489	2	2	3	376	42.587	6.64				0.74	0.631	0.627	0.609	0.848	0.816	0.564	0.694		430.2	297.5	318.4	271.4	205.7	269.8	261.8	253.1	364.8	364.6
Q9D071	Mms19	PE	MMS19 nucleotide excision repair protein homolog OS=Mus musculus GN=Mms19 PE=1 SV=1	5.33463	6	8	6	1031	113.017	6.21				0.724	1.275	1.197	0.694	0.57	1.076	0.836	0.676		438.8	408.9	317.8	559.4	317.9	525	304.6	256.8	250	380
Q3UJB9	Edc4	PE	Enhancer of mRNA-decapping protein 4 OS=Mus musculus GN=Edc4 PE=1 SV=2	3.69844	5	5	5	1406	152.389	5.78				0.855	1.183	1.11	0.892	0.793	0.885	0.957	0.83		371.5	319.4	317.5	439.6	345.3	412.4	331.2	299.5	294.7	360.9
P63037	Dnaja1	PE	DnaJ homolog subfamily A member 1 OS=Mus musculus GN=Dnaja1 PE=1 SV=1	9.82368	4	4	4	397	44.839	7.08				1.216	1.127	1.329	1.173	1.553	1.097	1.181	0.931		260.1	312.4	316.2	293.1	336.4	345.7	305.1	265.2	403.9	284.9
Q9CZU6	Cs	PE	Citrate synthase, mitochondrial OS=Mus musculus GN=Cs PE=1 SV=1	15.9483	7	7	7	464	51.703	8.57				1.269	1.126	1.547	0.965	2.6	0.874	0.522	0.58		248.2	357.9	314.9	279.5	213.6	384.1	239.4	237.3	645.4	409.2
Q8K212	Pacs1	PE	Phosphofurin acidic cluster sorting protein 1 OS=Mus musculus GN=Pacs1 PE=1 SV=2	8.74089	8	8	8	961	104.764	7.74				1.288	0.932	1.266	0.84	1.698	1.143	0.786	1.104		243.4	297	313.4	226.8	204.2	308.1	204.6	286.8	413.2	259.9
Q3UUV5	Skap1	PE	Src kinase-associated phosphoprotein 1 OS=Mus musculus GN=Skap1 PE=1 SV=1	4.50704	2	3	2	355	40.936	4.46				1.265	1.097	1.324	1.211	1.702	0.879	0.742	0.92		247	301.1	312.4	270.9	254.4	327.1	299.1	315.3	420.3	342.7
Q8VEE4	Rpa1	PE	Replication protein A 70 kDa DNA-binding subunit OS=Mus musculus GN=Rpa1 PE=1 SV=1	7.0626	5	5	5	623	68.994	7.91				1.638	1.133	1.288	1.165	2.166	0.84	0.873	0.71		190.7	235.3	312.3	216.1	244.5	245.5	222.2	198.8	413	280.1
Q91YE6	Ipo9	PE	Importin-9 OS=Mus musculus GN=Ipo9 PE=1 SV=3	7.68492	7	8	7	1041	115.978	4.81				0.824	1.305	1.078	0.613	0.571	1.008	0.708	0.604		378.5	342.2	311.7	494	240.5	408.1	232.2	205	216.1	339.5
P70398	Usp9x	PE	Probable ubiquitin carboxyl-terminal hydrolase FAF-X OS=Mus musculus GN=Usp9x PE=1 SV=2	3.90778	10	12	10	2559	290.526	5.87				0.781	1.258	1.149	0.763	0.819	0.878	0.862	0.785		398.4	373.1	311	501	366.6	457.7	303.9	333.6	326.3	425.1
Q8VI75	Ipo4	PE	Importin-4 OS=Mus musculus GN=Ipo4 PE=1 SV=1	5.63771	6	7	6	1082	119.198	5.03				0.824	1.301	1.106	0.642	0.458	0.96	0.621	0.646		376.9	357.1	310.7	490.3	231	416.8	241.9	240.4	172.8	372
P24270	Cat	PE	Catalase OS=Mus musculus GN=Cat PE=1 SV=4	5.50285	4	6	4	527	59.758	7.88				0.582	0.558	0.903	0.662	0.869	0.861	0.722	0.903		533.4	383.7	310.4	297.8	321.5	481.4	353	402.2	463.8	445.5
Q3TKT4	Smarca4	PE	Transcription activator BRG1 OS=Mus musculus GN=Smarca4 PE=1 SV=1	3.4098	5	5	5	1613	181.313	8				1.067	1.23	0.991	1.014	1.208	1.163	0.97	1.083		290.6	311.5	310.2	357.5	259.9	288.1	294.7	290.1	350.9	267.9
Q64378	Fkbp5	PE	Peptidyl-prolyl cis-trans isomerase FKBP5 OS=Mus musculus GN=Fkbp5 PE=1 SV=1	7.45614	5	5	5	456	50.934	7.8				1.613	1.161	1.316	0.852	2.104	1.27	1.008	0.986		191.5	288.7	308.8	222.3	229	251.9	163.2	224.1	402.9	227.3
Q61035	Hars	PE	Histidine--tRNA ligase, cytoplasmic OS=Mus musculus GN=Hars PE=1 SV=2	6.87623	4	4	4	509	57.396	6				0.976	0.982	0.947	0.928	1.018	0.929	0.685	0.889		315.9	286.4	308.3	310.1	211.3	299	293.1	274	321.5	308.3
Q8BX10	Pgam5	PE	Serine/threonine-protein phosphatase PGAM5, mitochondrial OS=Mus musculus GN=Pgam5 PE=1 SV=1	11.4583	4	6	4	288	31.975	9.04				0.769	0.846	0.765	0.742	0.811	0.896	0.787	0.825		399.2	315.8	306.9	337.6	277.4	305.4	296	290.8	323.7	352.5
Q8K1X1	Wdr11	PE	WD repeat-containing protein 11 OS=Mus musculus GN=Wdr11 PE=1 SV=1	5.23303	6	6	6	1223	135.851	7.11				0.912	1.006	0.908	1.057	0.983	0.862	0.669	1.081		335.7	275.7	306	337.6	213.9	304.9	355	345.6	330	319.7
Q9CQF3	Nudt21	PE	Cleavage and polyadenylation specificity factor subunit 5 OS=Mus musculus GN=Nudt21 PE=1 SV=1	14.978	4	4	4	227	26.224	8.82				1.007	0.857	0.868	1.016	1.374	0.958	0.618	0.75		303.6	312.6	305.7	260.1	201.8	263.5	308.5	244.7	417.2	326.3
P28658	Atxn10	PE	Ataxin-10 OS=Mus musculus GN=Atxn10 PE=1 SV=2	13.2632	6	7	6	475	53.673	5.25				0.745	1.368	1.251	0.553	0.661	0.917	0.699	0.423		409.8	384.4	305.5	560.6	293.3	512.8	226.4	177.3	270.8	419.4
P62334	Psmc6	PE	26S protease regulatory subunit 10B OS=Mus musculus GN=Psmc6 PE=1 SV=1	14.3959	5	5	5	389	44.145	7.49				1.149	1.194	1.214	1.037	1.399	1.074	0.793	0.884		265.2	321.4	304.7	316.6	237.3	322	275	264.5	371	299.3
E9QAZ2	Gm10020	PE	Ribosomal protein L15 OS=Mus musculus GN=Gm10020 PE=3 SV=1	14.7059	4	4	4	204	24.062	11.58				1.613	1.141	1.399	0.932	1.605	1.055	0.933	0.846		188.7	229.5	304.5	215.4	202.9	264	175.9	184	302.9	217.5
Q6PDM2	Srsf1	PE	Serine/arginine-rich splicing factor 1 OS=Mus musculus GN=Srsf1 PE=1 SV=3	20.1613	5	6	5	248	27.728	10.36				1.587	1.251	1.942	1.446	2.531	0.987	1.516	0.66		191.7	282.4	304.2	239.8	433.7	372.4	277.2	189	485.3	286.2
P16125	Ldhb	PE	L-lactate dehydrogenase B chain OS=Mus musculus GN=Ldhb PE=1 SV=2	12.2754	4	5	3	334	36.549	6.05				1.409	0.916	1.473	0.876	2.803	1.206	0.597	0.697		215.6	340.6	303.8	197.6	168.5	317.5	188.9	196.9	604.3	282.4
P46061	Rangap1	PE	Ran GTPase-activating protein 1 OS=Mus musculus GN=Rangap1 PE=1 SV=2	8.82852	6	6	6	589	63.491	4.68				0.798	1.047	0.681	0.982	0.814	0.771	0.515	0.774		380.9	288.2	303.8	398.6	192.5	259.4	374	289	309.9	373.7
Q9QZD9	Eif3i	PE	Eukaryotic translation initiation factor 3 subunit I OS=Mus musculus GN=Eif3i PE=1 SV=1	7.38462	3	3	3	325	36.438	5.64				1.272	1.061	1.142	1.194	1.835	0.916	0.559	0.723		238	280.5	302.8	252.5	171.1	271.9	284.1	221.4	436.6	306.2
Q78PY7	Snd1	PE	Staphylococcal nuclease domain-containing protein 1 OS=Mus musculus GN=Snd1 PE=1 SV=1	5.6044	5	5	5	910	102.025	7.43				1.102	1.082	1.117	1.048	1.889	0.943	0.658	0.68		274.7	308.8	302.7	297.2	215.5	306.8	287.8	222.6	518.9	327.6
O08709	Prdx6	PE	Peroxiredoxin-6 OS=Mus musculus GN=Prdx6 PE=1 SV=3	17.4107	3	7	3	224	24.855	6.01				1.995	1.27	2.383	1.091	3.852	1.395	0.666	0.494		151	372.5	301.2	191.8	177.9	359.9	164.7	132	581.6	267
P47754	Capza2	PE	F-actin-capping protein subunit alpha-2 OS=Mus musculus GN=Capza2 PE=1 SV=3	25.8741	6	7	4	286	32.947	5.85				1.129	1.019	1.099	0.866	1.216	1.041	0.899	1.171		266.7	277.7	301.1	271.7	239.6	293	231	312.2	324.4	266.7
Q69Z99	Znf512	PE	Zinc finger protein 512 OS=Mus musculus GN=Znf512 PE=2 SV=2	19.0391	9	9	9	562	63.867	9.51				0.789	0.934	0.91	0.86	0.845	0.865	2.889	1.036		379.7	291	299.6	354.5	971.4	345.4	326.7	348.2	321	336.3
Q05144	Rac2	PE	Ras-related C3 botulinum toxin substrate 2 OS=Mus musculus GN=Rac2 PE=1 SV=1	27.6042	5	10	4	192	21.427	7.61				1.431	1.288	1.464	0.991	2.611	1.007	1.019	0.513		209.4	316.1	299.6	269.8	319.7	306.5	207.5	161.1	546.7	313.9
Q08943	Ssrp1	PE	FACT complex subunit SSRP1 OS=Mus musculus GN=Ssrp1 PE=1 SV=2	7.06215	6	6	6	708	80.81	6.76				1.303	1.14	1.24	1.282	1.984	1.034	1.34	0.912		229.6	276.1	299.1	261.7	357.9	284.6	294.3	243.4	455.5	267
Q9D172	D10Jhu81e	PE	ES1 protein homolog, mitochondrial OS=Mus musculus GN=D10Jhu81e PE=1 SV=1	19.9248	4	5	4	266	28.073	8.78				0.731	0.918	0.801	1.422	1.098	0.844	0.779	1.09		408.3	290	298.6	374.7	267.5	327.2	580.8	374.6	448.2	343.6
Q8K411	Pitrm1	PE	Presequence protease, mitochondrial OS=Mus musculus GN=Pitrm1 PE=1 SV=1	6.37066	7	7	7	1036	117.297	7.2				0.988	1.349	1.18	1.257	1.561	0.834	0.898	1.017		302.3	270	298.5	407.8	290.9	356.7	380	329.5	471.8	324
Q9QUG9	Rasgrp2	PE	RAS guanyl-releasing protein 2 OS=Mus musculus GN=Rasgrp2 PE=1 SV=2	12.1711	7	8	7	608	69.401	7.66				0.74	0.951	1.079	0.564	0.812	1.031	1.678	0.723		402.8	354.5	298.3	383.2	577.1	434.6	227.1	248.7	327.2	343.9
P48758	Cbr1	PE	Carbonyl reductase [NADPH] 1 OS=Mus musculus GN=Cbr1 PE=1 SV=3	25.9928	7	7	7	277	30.622	8.31				1.116	1.14	1.779	1.006	1.971	0.908	0.655	0.659		267	328.5	297.9	304.5	237.2	475	268.7	238.6	526.3	362
P47791	Gsr	PE	Glutathione reductase, mitochondrial OS=Mus musculus GN=Gsr PE=1 SV=3	9.6	4	5	4	500	53.629	7.99				0.986	1.094	1.062	1.033	1.561	1.026	0.52	0.642		302.1	369.5	297.7	330.4	187.2	320.8	312.1	231.1	471.4	360
P68368	Tuba4a	PE	Tubulin alpha-4A chain OS=Mus musculus GN=Tuba4a PE=1 SV=1	39.7321	16	25	3	448	49.892	5.06				1.065	1.08	1.078	1.348	1.312	1.008	0.759	0.946		279.5	318	297.6	301.7	239.4	301.2	376.6	298.5	366.6	315.5
Q9CRT8	Xpot	PE	Exportin-T OS=Mus musculus GN=Xpot PE=1 SV=3	7.16511	7	8	7	963	109.663	5.25				0.762	1.307	1.108	0.583	0.524	0.829	0.679	0.563		390.3	336.5	297.6	509.9	275.6	432.6	227.4	228.5	204.4	406.1
P48678	Lmna	PE	Prelamin-A/C OS=Mus musculus GN=Lmna PE=1 SV=2	16.5414	10	11	9	665	74.193	6.98				1.109	1.435	1.531	1.726	1.254	0.822	1.167	0.75		267.9	299.7	297.1	384.3	425.3	410.2	462.2	273.5	335.9	364.4
Q8R016	Blmh	PE	Bleomycin hydrolase OS=Mus musculus GN=Blmh PE=1 SV=1	9.45055	5	6	5	455	52.477	6.48				0.572	0.581	0.826	0.673	0.681	0.833	0.637	0.983		518.3	367	296.5	301.1	280.5	428	348.8	433	352.9	440.5
Q9Z110	Aldh18a1	PE	Delta-1-pyrroline-5-carboxylate synthase OS=Mus musculus GN=Aldh18a1 PE=1 SV=2	8.93082	6	7	6	795	87.212	7.55				0.882	1.569	0.997	1.031	1.074	0.875	0.626	1.034		336.1	273.5	296.4	527.3	195.8	335.1	346.3	323.2	361	312.6
Q9D6R2	Idh3a	PE	Isocitrate dehydrogenase [NAD] subunit alpha, mitochondrial OS=Mus musculus GN=Idh3a PE=1 SV=1	19.9454	7	7	7	366	39.613	6.73				1.132	1.19	1.293	1.106	1.61	0.939	0.79	0.827		261.8	303.9	296.4	311.4	255.5	338.4	289.5	267.7	421.4	323.5
Q99KJ8	Dctn2	PE	Dynactin subunit 2 OS=Mus musculus GN=Dctn2 PE=1 SV=3	10.199	4	4	4	402	44.09	5.26				0.97	1.07	0.936	1.022	1.156	0.882	0.651	0.82		305.7	308.1	296.4	327.2	227.5	286.2	312.4	286.3	353.3	349.4
Q8C166	Cpne1	PE	Copine-1 OS=Mus musculus GN=Cpne1 PE=1 SV=1	9.14179	5	6	5	536	58.849	5.66				1.325	1.143	1.612	0.983	2.703	0.915	0.63	0.526		223.3	333.5	295.8	255.1	229.5	359.9	219.5	191.6	603.5	364.4
Q91YQ5	Rpn1	PE	Dolichyl-diphosphooligosaccharide--protein glycosyltransferase subunit 1 OS=Mus musculus GN=Rpn1 PE=1 SV=1	8.71711	6	6	6	608	68.486	6.46				1.152	1.187	1.1	1.068	1.88	0.934	0.7	0.632		255.9	307.7	294.9	303.8	230.6	281.4	273.4	208.1	481.1	329.4
Q60932	Vdac1	PE	Voltage-dependent anion-selective channel protein 1 OS=Mus musculus GN=Vdac1 PE=1 SV=3	14.527	5	8	4	296	32.331	8.43				1.112	1.069	1.453	0.902	1.332	1.039	0.735	0.657		263.3	256.8	292.7	281.4	181.6	382.5	237.5	162.2	350.9	247.1
ENSEMBL:ENSBTAP00000024462			(Bos taurus) 47 kDa protein	6.68258	2	4	2	419	46.515	6.33		Y	Y	1.487	0.903	1.134	1.305	0.814	0.844	0.626	0.77		196.8	162.1	292.7	177.7	120.3	223.2	256.9	147.8	160.2	192.1
P19783	Cox4i1	PE	Cytochrome c oxidase subunit 4 isoform 1, mitochondrial OS=Mus musculus GN=Cox4i1 PE=1 SV=2	27.8107	4	5	4	169	19.518	9.23				1.001	0.714	1.005	0.581	1.591	1.006	0.676	0.59		292.1	339.4	292.4	208.6	227.9	293.7	169.7	199	464.7	337.3
Q8BL97	Srsf7	PE	Serine/arginine-rich splicing factor 7 OS=Mus musculus GN=Srsf7 PE=1 SV=1	15.7303	4	5	3	267	30.799	11.9				1.959	1.405	1.415	1.27	1.944	0.812	1.002	0.779		149.1	159.6	292	209.4	197	210.9	189.3	153.1	289.8	196.6
Q9Z1F9	Uba2	PE	SUMO-activating enzyme subunit 2 OS=Mus musculus GN=Uba2 PE=1 SV=1	3.44828	3	3	3	638	70.525	5.24				1.394	1.536	1.536	0.469	3.243	0.927	0.745	0.348		209.3	400.8	291.7	321.5	322.2	321.5	98.1	150.3	678.7	432.4
P61620	Sec61a1	PE	Protein transport protein Sec61 subunit alpha isoform 1 OS=Mus musculus GN=Sec61a1 PE=1 SV=2	9.03361	4	7	4	476	52.231	8.06				0.772	1.187	1.092	0.612	0.801	0.943	0.783	0.524		376.8	353.2	290.9	447.1	293.3	411.4	230.5	196.3	301.9	374.6
P0C0S6	H2afz	PE	Histone H2A.Z OS=Mus musculus GN=H2afz PE=1 SV=2	31.25	4	56	2	128	13.545	10.58				1.067	0.942	1.709	2.902	0.765	0.426	1.963	0.895		272.2	193.2	290.5	256.5	889.5	465.2	789.8	405.5	208.3	453.2
Q7TNP2	Ppp2r1b	PE	Serine/threonine-protein phosphatase 2A 65 kDa regulatory subunit A beta isoform OS=Mus musculus GN=Ppp2r1b PE=1 SV=2	22.4626	12	13	6	601	65.892	5.1				0.721	1.183	0.976	0.722	0.548	0.828	0.678	0.494		401.3	328.6	289.4	474.7	268.8	391.7	289.6	196	219.9	396.7
Q9DBC7	Prkar1a	PE	cAMP-dependent protein kinase type I-alpha regulatory subunit OS=Mus musculus GN=Prkar1a PE=1 SV=3	23.8845	8	8	8	381	43.158	5.35				1.327	1.272	1.504	0.934	2.238	0.898	0.667	0.681		217.8	284.1	288.9	277	211.1	327.5	203.4	215.4	487.4	316.5
Q5SQX6	Cyfip2	PE	Cytoplasmic FMR1-interacting protein 2 OS=Mus musculus GN=Cyfip2 PE=1 SV=2	4.30966	5	5	5	1253	145.565	7.05				1.112	0.998	1.145	1.137	2.054	0.999	0.74	0.995		259.8	295.7	288.8	259.3	219	297.5	295.3	294.5	533.8	295.9
O88673	Dgka	PE	Diacylglycerol kinase alpha OS=Mus musculus GN=Dgka PE=1 SV=2	3.28767	3	3	3	730	82.708	6.49				1.264	1.068	1.337	0.844	1.936	0.965	0.774	0.868		228	271.3	288.1	243.4	217.5	304.7	192.4	244	441.3	281
P62313	Lsm6	PE	U6 snRNA-associated Sm-like protein LSm6 OS=Mus musculus GN=Lsm6 PE=1 SV=1	33.75	3	3	3	80	9.122	9.58				1.163	1.21	1.216	1.13	1.46	0.942	0.691	0.854		246.7	284.6	286.8	298.5	208.7	300.1	278.8	258	360.1	302.1
P60867	Rps20	PE	40S ribosomal protein S20 OS=Mus musculus GN=Rps20 PE=1 SV=1	26.8908	3	11	3	119	13.364	9.94				0.988	0.911	1.254	1.193	1.203	0.816	5.773	0.784		289.4	274.2	285.8	263.7	1939.2	362.8	345.2	263.2	348.3	335.9
Q80U93	Nup214	PE	Nuclear pore complex protein Nup214 OS=Mus musculus GN=Nup214 PE=1 SV=2	4.1247	8	8	8	2085	212.847	7.08				0.711	0.762	0.611	1.172	0.945	0.59	0.605	1.06		401.7	199.4	285.6	306.2	204.8	245.6	470.7	358.7	379.5	338.3
Q9WUM5	Suclg1	PE	Succinate--CoA ligase [ADP/GDP-forming] subunit alpha, mitochondrial OS=Mus musculus GN=Suclg1 PE=1 SV=4	9.53757	3	4	3	346	36.132	9.39				1.263	1.406	1.528	1.364	2.244	0.909	1.055	0.954		226.2	277.7	285.6	318	322.4	345.6	308.5	291.5	507.5	305.5
B1AY13	Usp24	PE	Ubiquitin carboxyl-terminal hydrolase 24 OS=Mus musculus GN=Usp24 PE=1 SV=1	1.06993	4	4	4	2617	293.814	6.19				0.838	1.078	1.544	0.611	0.857	0.886	0.725	1.21		340.9	283	285.6	367.6	231.4	526.2	208.2	386.3	292.1	319.3
Q64010	Crk	PE	Adapter molecule crk OS=Mus musculus GN=Crk PE=1 SV=1	14.8026	4	4	4	304	33.794	5.55				1.286	1.037	1.055	0.963	1.221	0.866	0.551	1.309		221.5	208.1	284.8	229.7	132.4	233.7	213.2	314.6	270.5	240.4
O09167	Rpl21	PE	60S ribosomal protein L21 OS=Mus musculus GN=Rpl21 PE=1 SV=3	23.125	5	5	5	160	18.55	10.49				1.478	1.437	1.824	0.8	1.964	1.543	2.605	1.487		192.5	251	284.5	276.6	423.6	351.2	154.1	241.8	378.2	162.6
Q6NVF9	Cpsf6	PE	Cleavage and polyadenylation specificity factor subunit 6 OS=Mus musculus GN=Cpsf6 PE=1 SV=1	11.0708	5	6	5	551	59.116	7.15				0.775	0.947	0.724	1.472	0.93	0.922	0.558	0.987		366.6	332.9	284.1	347.1	201.3	265.2	539.6	356.3	340.8	361
P54823	Ddx6	PE	Probable ATP-dependent RNA helicase DDX6 OS=Mus musculus GN=Ddx6 PE=1 SV=1	5.7971	3	3	3	483	54.157	8.66				1.106	1.116	1.443	0.907	1.554	0.707	0.969	0.805		256.4	264.8	283.6	286.2	362.9	370	232.5	301.8	398.4	374.7
P13020	Gsn	PE	Gelsolin OS=Mus musculus GN=Gsn PE=1 SV=3	7.94872	6	6	4	780	85.888	6.18				0.889	0.893	0.805	0.638	1.386	0.792	0.435	0.522		318.9	318.3	283.4	284.7	174.8	256.6	203.4	209.7	442.1	401.8
P51125	Cast	PE	Calpastatin OS=Mus musculus GN=Cast PE=1 SV=2	5.45685	4	4	4	788	84.871	5.52				1.057	1.065	0.999	1.092	1.625	0.914	0.742	0.921		267.7	248.9	283.1	285.2	202	267.4	292.5	250.6	435.1	272.2
Q9CY58	Serbp1	PE	Plasminogen activator inhibitor 1 RNA-binding protein OS=Mus musculus GN=Serbp1 PE=1 SV=2	20.6388	6	8	6	407	44.687	8.54				0.941	0.937	1.04	1.124	1.271	0.874	1.308	0.846		300.2	337.5	282.4	281.4	505.3	312.3	337.4	326.9	381.7	386.4
O35286	Dhx15	PE	Pre-mRNA-splicing factor ATP-dependent RNA helicase DHX15 OS=Mus musculus GN=Dhx15 PE=1 SV=2	8.05031	6	9	6	795	90.949	7.46				1.309	1.242	1.3	1.177	1.849	0.981	0.936	0.899		215.4	246.5	282.1	267.6	235.1	280.1	253.5	225.8	398.4	251.2
Q9CPQ8	Atp5l	PE	ATP synthase subunit g, mitochondrial OS=Mus musculus GN=Atp5l PE=1 SV=1	48.5437	4	10	4	103	11.417	9.74				0.768	0.931	0.797	0.933	0.907	0.972	2.353	0.848		366.2	332.5	281.1	341.1	805.3	291.7	341.8	290.1	332.1	342.3
P35492	Hal	PE	Histidine ammonia-lyase OS=Mus musculus GN=Hal PE=1 SV=1	6.08828	4	4	4	657	72.212	6.34				0.727	0.646	0.938	0.909	0.721	1.196	0.841	1.302		386.1	428.1	280.6	249.5	301	362.2	351.2	466.1	278.4	358
Q9DCH4	Eif3f	PE	Eukaryotic translation initiation factor 3 subunit F OS=Mus musculus GN=Eif3f PE=1 SV=2	12.7424	4	5	4	361	37.96	5.58				1.022	1.018	1.043	1.038	1.688	0.524	0.406	0.667		272.8	302.4	278.9	277.9	234.3	284.6	283	384.9	460.5	577.3
Q00417	Tcf7	PE	Transcription factor 7 OS=Mus musculus GN=Tcf7 PE=2 SV=2	19.0931	8	13	5	419	45.437	7.97				0.852	1.251	0.958	1.07	0.829	1.095	4.738	0.909		327	333.1	278.5	409	1440.9	313.4	350	276.4	271.2	304.1
P62717	Rpl18a	PE	60S ribosomal protein L18a OS=Mus musculus GN=Rpl18a PE=1 SV=1	23.2955	5	6	5	176	20.719	10.71				1.401	1.328	1.406	0.974	1.775	1.043	1.1	0.85		198.7	240.7	278.4	264	253.8	279.4	193.6	196.2	352.9	230.8
Q9D823	Rpl37	PE	60S ribosomal protein L37 OS=Mus musculus GN=Rpl37 PE=3 SV=3	26.8041	4	4	4	97	11.071	11.74				1.106	1.651	1.459	0.829	1.524	1.001	2.371	1.76		251.6	217.3	278.4	415.4	514.6	367.1	208.5	382.1	383.3	217.1
Q61545	Ewsr1	PE	RNA-binding protein EWS OS=Mus musculus GN=Ewsr1 PE=1 SV=2	15.5725	7	14	7	655	68.42	9.33				0.852	1.186	1.088	2.089	1.2	0.842	7.405	1.407		326.3	302.4	278.1	387	2657.8	354.9	681.8	505.1	391.5	358.9
P01887	B2m	PE	Beta-2-microglobulin OS=Mus musculus GN=B2m PE=1 SV=2	29.4118	4	5	4	119	13.77	8.44				0.895	1.14	1.059	0.74	1.076	0.987	0.809	0.688		310.2	330.4	277.6	353.5	270.8	328.6	229.6	230.2	333.7	334.7
O70503	Hsd17b12	PE	Very-long-chain 3-oxoacyl-CoA reductase OS=Mus musculus GN=Hsd17b12 PE=1 SV=1	15.0641	4	4	4	312	34.719	9.52				0.879	1.091	1.29	1.043	1.427	1.036	3.586	1.106		315.2	286.2	277	343.9	990.2	406.7	328.8	305.3	449.7	276.1
Q9D1I2	Card19	PE	Caspase recruitment domain-containing protein 19 OS=Mus musculus GN=Card19 PE=1 SV=1	29.5082	5	6	5	183	20.923	8.03				0.505	0.893	0.595	0.497	0.299	0.759	0.57	0.435		548	349.6	276.7	489.5	262.6	325.9	272.4	200.2	163.6	460.4
Q3TWW8	Srsf6	PE	Serine/arginine-rich splicing factor 6 OS=Mus musculus GN=Srsf6 PE=1 SV=1	10.3245	4	5	3	339	39.002	11.46				1.291	0.998	1.435	0.91	1.697	0.803	0.756	0.518		214.2	240.8	276.5	213.9	226.7	307.4	195	155.4	363.5	300
P70441	Slc9a3r1	PE	Na(+)/H(+) exchange regulatory cofactor NHE-RF1 OS=Mus musculus GN=Slc9a3r1 PE=1 SV=3	13.5211	5	5	5	355	38.577	5.9				1.322	1.117	1.309	0.939	2.129	0.796	0.496	0.472		209	285.1	276.3	233.3	177.9	273.5	196.2	169	444.9	358.4
P10711	Tcea1	PE	Transcription elongation factor A protein 1 OS=Mus musculus GN=Tcea1 PE=1 SV=2	17.2757	5	5	5	301	33.859	8.38				1.354	1.11	1.327	0.82	2.065	0.991	0.692	0.64		203.6	295.1	275.7	226.1	206	270.1	166.9	190.5	420.5	297.7
Q99KH8	Stk24	PE	Serine/threonine-protein kinase 24 OS=Mus musculus GN=Stk24 PE=1 SV=1	8.35267	4	4	2	431	47.924	5.43				0.986	0.947	1.007	0.97	1.4	1.011	0.895	0.858		278.7	254.4	274.7	263.9	225.2	280.7	270.3	216	390	251.7
Q80W00	Ppp1r10	PE	Serine/threonine-protein phosphatase 1 regulatory subunit 10 OS=Mus musculus GN=Ppp1r10 PE=1 SV=1	7.54505	7	7	7	888	94.313	9.16				1.048	1.336	0.95	1.207	1.284	1.096	0.924	1.61		261.3	266.4	273.9	349.1	224.6	248.2	315.5	391.2	335.6	243
Q61166	Mapre1	PE	Microtubule-associated protein RP/EB family member 1 OS=Mus musculus GN=Mapre1 PE=1 SV=3	6.34328	2	2	2	268	29.997	5.22				1.53	1.271	1.926	0.83	3.208	0.874	0.505	0.452		177.9	304.5	272.2	226.2	175.9	342.7	147.7	157.5	570.8	348.5
Q99KK7	Dpp3	PE	Dipeptidyl peptidase 3 OS=Mus musculus GN=Dpp3 PE=1 SV=2	7.45257	5	5	5	738	82.846	5.38				1.078	1.114	1.142	0.938	1.592	0.785	0.631	0.603		252.2	270.5	272	281	217.3	288	236.6	208	401.5	344.6
Q9ESJ0	Xpo4	PE	Exportin-4 OS=Mus musculus GN=Xpo4 PE=1 SV=2	4.43093	6	7	6	1151	129.896	5.12				0.757	1.507	1.165	0.798	0.693	0.998	0.831	0.733		359.3	369.7	271.9	541.5	307.7	418.8	286.7	271.5	249	370.4
Q8K2B3	Sdha	PE	Succinate dehydrogenase [ubiquinone] flavoprotein subunit, mitochondrial OS=Mus musculus GN=Sdha PE=1 SV=1	10.241	6	11	6	664	72.539	7.37				1.149	1.216	1.108	1.114	2.027	0.754	0.567	0.766		236.1	234.9	271.4	287	176.7	261.7	263.1	238.7	478.8	311.6
Q8CGP0	Hist3h2bb	PE	Histone H2B type 3-B OS=Mus musculus GN=Hist3h2bb PE=1 SV=3	58.7302	10	92	4	126	13.9	10.32				0.671	1.105	1.96	2.733	1.018	0.491	2.426	1.009		403.8	281	271	446.3	1389.8	791.4	1103.4	577.8	411.1	572.8
P00920	Ca2	PE	Carbonic anhydrase 2 OS=Mus musculus GN=Ca2 PE=1 SV=4	23.4615	5	6	5	260	29.015	7.01				1.132	0.803	0.927	0.601	1.55	0.825	0.307	0.275		239.3	372.7	270.9	192.1	138.6	221.9	143.8	124.1	370.9	451.5
P27546	Map4	PE	Microtubule-associated protein 4 OS=Mus musculus GN=Map4 PE=1 SV=3	5.15556	6	6	6	1125	117.357	4.98				1.089	1.167	0.91	1.298	1.328	0.708	0.626	1.026		247.9	170.1	270	289.3	150.3	225.7	321.8	246.6	329.2	240.3
P57784	Snrpa1	PE	U2 small nuclear ribonucleoprotein A' OS=Mus musculus GN=Snrpa1 PE=1 SV=2	23.1373	5	7	5	255	28.34	8.62				1.527	1.363	1.343	1.227	1.649	1.186	0.909	0.886		176.4	259.1	269.4	240.3	198.6	236.8	216.5	193.7	290.9	218.5
Q924Z6	Xpo6	PE	Exportin-6 OS=Mus musculus GN=Xpo6 PE=1 SV=2	4.88889	5	5	5	1125	128.582	6.37				0.768	1.327	1.245	0.593	0.568	0.833	0.765	0.584		350.7	280.3	269.2	465.5	257.3	436.7	207.9	196.5	199.3	336.5
P48193	Epb41	PE	Protein 4.1 OS=Mus musculus GN=Epb41 PE=1 SV=2	8.27506	6	7	6	858	95.853	5.6				1.038	1.424	0.931	1.117	0.909	0.894	0.597	1.202		259.2	245.2	269	369.1	163.7	241.4	289.4	329.6	235.5	274.2
Q8BFQ4	Wdr82	PE	WD repeat-containing protein 82 OS=Mus musculus GN=Wdr82 PE=1 SV=1	15.9744	5	6	5	313	35.056	7.69				1.023	0.993	0.972	1.32	1.154	0.919	1.015	1.15		262.5	239.9	268.5	260.6	265	255.2	346.5	300.2	302.9	261
P48036	Anxa5	PE	Annexin A5 OS=Mus musculus GN=Anxa5 PE=1 SV=1	21.3166	6	7	5	319	35.73	4.96				1.426	1.257	1.65	1.751	3.155	0.937	0.463	0.551		188.1	350.8	268.3	236.5	173.2	310.5	329.5	206.3	593.5	374.5
Q8BNW9	Kbtbd11	PE	Kelch repeat and BTB domain-containing protein 11 OS=Mus musculus GN=Kbtbd11 PE=1 SV=3	4.73934	4	4	4	633	67.904	5.39				0.821	0.649	0.957	0.567	1.242	1.083	0.845	0.859		326.4	305.3	268.1	211.7	238.3	312.3	184.9	242.1	405.4	282
Q6PE01	Snrnp40	PE	U5 small nuclear ribonucleoprotein 40 kDa protein OS=Mus musculus GN=Snrnp40 PE=1 SV=1	11.4525	4	4	4	358	39.251	8.1				1.125	1.323	1.085	1.183	1.003	0.849	0.754	0.747		238.4	246.2	268.1	315.4	218.9	258.7	281.9	216.7	239.2	290.1
Q61735	Cd47	PE	Leukocyte surface antigen CD47 OS=Mus musculus GN=Cd47 PE=1 SV=2	4.29043	2	2	2	303	33.076	8.63				1.372	0.879	1.248	0.711	2.228	1.084	0.692	0.671		195.3	280.9	268	171.6	179.4	243.7	139	173.8	435.2	259.1
O55201	Supt5h	PE	Transcription elongation factor SPT5 OS=Mus musculus GN=Supt5h PE=1 SV=1	5.36044	6	6	6	1082	120.589	5.05				1.205	0.97	1.196	0.904	1.968	0.885	0.862	0.653		222.4	252.2	267.8	215.8	245.9	265.9	201	186.2	437.5	285.1
Q99KF1	Tmed9	PE	Transmembrane emp24 domain-containing protein 9 OS=Mus musculus GN=Tmed9 PE=1 SV=2	11.9149	3	3	3	235	27.11	8.41				1.283	0.808	0.909	0.691	1.542	0.812	0.54	0.626		208.4	208.1	267.3	168.5	138.2	189.5	144	160.4	321.3	256.2
Q9Z315	Sart1	PE	U4/U6.U5 tri-snRNP-associated protein 1 OS=Mus musculus GN=Sart1 PE=1 SV=1	12.531	8	8	8	806	90.83	5.82				1.08	1.35	1.2	1.281	1.525	0.999	1.153	1.295		246.8	232.8	266.5	333.2	268.8	296.2	316.3	301.9	376.5	233.1
Q3TLH4	Prrc2c	PE	Protein PRRC2C OS=Mus musculus GN=Prrc2c PE=1 SV=3	2.45959	7	7	6	2846	310.703	9.1				0.889	1.201	1.083	1.113	1.132	1.03	1.264	1.053		299.5	301	266.4	359.9	369.1	324.4	333.4	307.7	339	292.1
Q64523	Hist2h2ac	PE	Histone H2A type 2-C OS=Mus musculus GN=Hist2h2ac PE=1 SV=3	62.7907	8	94	2	129	13.98	10.9				0.651	1.044	1.678	4.997	0.708	0.259	2.725	0.961		408.8	144.8	266.1	427	1525.8	685.7	2042.8	537.8	289.6	559.9
Q6P2K6	Ppp4r3a	PE	Serine/threonine-protein phosphatase 4 regulatory subunit 3A OS=Mus musculus GN=Ppp4r3a PE=1 SV=1	7.68293	6	7	6	820	93.783	4.89				1.001	1.055	0.962	1.377	1.145	1.006	0.787	1.131		265.3	254.5	265.6	280	199.3	255.3	365.3	286.3	303.7	253
Q05512	Mark2	PE	Serine/threonine-protein kinase MARK2 OS=Mus musculus GN=Mark2 PE=1 SV=3	12.2423	9	9	6	776	86.252	9.67				0.876	1.065	1.038	0.995	1.146	1.094	4.687	0.995		303	334.5	265.5	322.8	1432.7	314.6	301.5	304.1	347.1	305.7
Q792Z1	Try10	PE	MCG140784 OS=Mus musculus GN=Try10 PE=1 SV=1	4.06504	1	3	1	246	26.204	5.83				0.733	1.021	0.747	1	0.656	0.763	0.508	1.153		361	251.4	264.5	368.5	167.3	269.8	361	380	236.8	329.6
Q9QYC0	Add1	PE	Alpha-adducin OS=Mus musculus GN=Add1 PE=1 SV=2	10.2041	5	6	5	735	80.596	5.9				0.722	0.768	0.71	0.784	0.708	0.793	0.628	0.826		365.2	269.8	263.7	280.4	213.7	259.4	286.2	281.1	258.6	340.1
P70224	Gimap1	PE	GTPase IMAP family member 1 OS=Mus musculus GN=Gimap1 PE=1 SV=3	14.4404	5	6	5	277	30.809	9				1.138	0.824	1.327	0.856	1.771	1.23	2.745	0.956		231	286.4	262.9	190.4	639.1	306.6	197.8	222.5	409.3	232.9
Q8CGY8	Ogt	PE	UDP-N-acetylglucosamine--peptide N-acetylglucosaminyltransferase 110 kDa subunit OS=Mus musculus GN=Ogt PE=1 SV=2	3.25048	4	5	4	1046	116.877	6.7				0.916	0.891	0.84	0.848	1.089	0.784	0.585	0.77		285.6	260.1	261.5	254.3	194.3	239.9	242.3	255.4	310.9	331.9
Q9D1J3	Sarnp	PE	SAP domain-containing ribonucleoprotein OS=Mus musculus GN=Sarnp PE=1 SV=3	28.5714	5	6	5	210	23.518	6.65				1.512	1.643	2.073	1.232	2.084	1.161	1.76	0.759		172.2	292.2	260.3	282.8	442.8	357	212	191	358.9	251.7
Q6A068	Cdc5l	PE	Cell division cycle 5-like protein OS=Mus musculus GN=Cdc5l PE=1 SV=2	5.61097	4	6	4	802	92.133	8.02				0.912	0.774	0.925	2.368	1.093	0.907	1.069	0.998		284.6	202.9	259.7	220.2	239.1	263.3	673.9	223.2	311.2	223.6
P83882	Rpl36a	PE	60S ribosomal protein L36a OS=Mus musculus GN=Rpl36a PE=1 SV=2	16.9811	3	6	3	106	12.433	10.58				1.186	2.328	1.614	1.288	1.575	1.499	3.788	2.162		219	269.3	259.6	509.7	680.4	353.3	282.1	388.2	344.9	179.6
P26369	U2af2	PE	Splicing factor U2AF 65 kDa subunit OS=Mus musculus GN=U2af2 PE=1 SV=3	4.84211	3	3	3	475	53.483	9.09				1.72	1.253	1.77	0.923	3.074	1.1	1.161	0.64		150.2	271.4	258.4	188.2	286.5	265.9	138.7	158	461.8	246.8
P50516	Atp6v1a	PE	V-type proton ATPase catalytic subunit A OS=Mus musculus GN=Atp6v1a PE=1 SV=2	11.0211	7	7	7	617	68.283	5.58				0.668	0.698	0.706	0.65	0.703	0.971	0.651	0.656		385.3	281.3	257.2	269	188.6	272	250.3	190	270.7	289.6
Q61081	Cdc37	PE	Hsp90 co-chaperone Cdc37 OS=Mus musculus GN=Cdc37 PE=1 SV=1	15.8311	5	6	5	379	44.565	5.34				1.343	0.997	1.437	0.884	1.984	1.158	0.798	0.922		191.1	269.1	256.6	190.6	185.4	274.7	168.9	214.2	379.3	232.4
O35226	Psmd4	PE	26S proteasome non-ATPase regulatory subunit 4 OS=Mus musculus GN=Psmd4 PE=1 SV=1	5.85106	3	4	3	376	40.678	4.79				1.162	1.314	1.199	1.725	1.332	0.946	0.567	0.947		220.9	263.9	256.5	290.3	158.2	264.9	380.9	264.3	294.1	279.1
Q922D8	Mthfd1	PE	C-1-tetrahydrofolate synthase, cytoplasmic OS=Mus musculus GN=Mthfd1 PE=1 SV=4	11.2299	10	12	9	935	101.136	7.14				1.277	1.164	1.383	0.871	2.237	0.919	0.666	0.595		200.6	262.7	256.1	233.4	190.4	277.4	174.7	170	448.6	286
P63085	Mapk1	PE	Mitogen-activated protein kinase 1 OS=Mus musculus GN=Mapk1 PE=1 SV=3	10.6145	4	4	4	358	41.249	6.98				1.254	1.785	1.277	1.328	2.258	0.899	0.717	0.662		204.2	300.4	256.1	364.4	239.8	260.6	271	221.3	461	334.3
Q91WK2	Eif3h	PE	Eukaryotic translation initiation factor 3 subunit H OS=Mus musculus GN=Eif3h PE=1 SV=1	12.2159	4	4	4	352	39.807	6.67				1.222	0.849	1.03	0.913	1.771	0.901	0.584	0.714		209.4	226.1	255.8	177.7	146.7	215.7	191.1	179.3	370.9	251
Q6NZB0	Dnajc8	PE	DnaJ homolog subfamily C member 8 OS=Mus musculus GN=Dnajc8 PE=1 SV=2	9.09091	3	5	3	253	29.794	9.06				1.294	1.15	1.441	0.94	2.406	0.985	0.682	0.608		197.6	301.9	255.7	227.3	209.2	284.7	185.7	186.4	475.5	306.6
P46471	Psmc2	PE	26S protease regulatory subunit 7 OS=Mus musculus GN=Psmc2 PE=1 SV=5	16.6282	7	7	7	433	48.617	5.95				0.835	1.074	0.907	0.981	1.071	1.172	0.869	0.943		305.4	317.5	255	327.9	235.4	277.1	299.6	255.3	327.1	270.9
Q8C092	Taf5	PE	Transcription initiation factor TFIID subunit 5 OS=Mus musculus GN=Taf5 PE=1 SV=1	5.86767	4	4	4	801	86.99	5.64				0.853	0.574	0.622	0.816	0.583	0.819	0.568	0.787		298.9	240.1	255	171.7	166.6	186.1	244	230.7	174.3	293.3
P17897	Lyz1	PE	Lysozyme C-1 OS=Mus musculus GN=Lyz1 PE=1 SV=1	18.9189	3	7	3	148	16.783	9.41				0.862	1.795	4.396	8.469	0.814	0.921	1.057	0.691		295.3	404	254.5	530	463.4	1298.1	2500.5	303	240.5	438.5
Q9Z0P5	Twf2	PE	Twinfilin-2 OS=Mus musculus GN=Twf2 PE=1 SV=1	26.9341	6	8	6	349	39.446	6.8				1.056	0.904	1.037	0.589	1.652	0.819	0.614	0.585		240.8	242.8	254.2	217.6	182.1	249.8	141.9	173.5	397.7	296.5
P55264	Adk	PE	Adenosine kinase OS=Mus musculus GN=Adk PE=1 SV=2	7.20222	3	5	3	361	40.123	6.21				1.302	0.962	1.307	0.993	2.323	0.937	0.726	0.559		194.6	239	253.4	187.2	185.2	254.4	193.3	142.5	452	255.1
O54786	Dffa	PE	DNA fragmentation factor subunit alpha OS=Mus musculus GN=Dffa PE=1 SV=2	5.13595	2	2	2	331	36.55	4.91				1.087	1.047	0.913	0.635	1.662	1.183	0.567	2.81		233.1	303.7	253.4	244.1	145.5	212.9	148.1	721.4	387.5	256.7
Q8CHT0	Aldh4a1	PE	Delta-1-pyrroline-5-carboxylate dehydrogenase, mitochondrial OS=Mus musculus GN=Aldh4a1 PE=1 SV=3	19.0391	9	10	9	562	61.802	8.24				0.912	1.32	1.037	1.148	1.059	0.825	0.732	1.023		275.6	233.9	251.5	363.8	207.7	285.9	316.5	290.1	291.9	283.7
P56383	Atp5g2	PE	ATP synthase F(0) complex subunit C2, mitochondrial OS=Mus musculus GN=Atp5g2 PE=2 SV=2	4.79452	1	3	1	146	15.466	10.35				1.173	0.883	1.259	0.998	1.552	0.806	0.542	0.505		214.5	233.4	251.5	189.4	156.8	270	214.1	146.1	332.9	289.6
D3YXK2	Safb	PE	Scaffold attachment factor B1 OS=Mus musculus GN=Safb PE=1 SV=2	6.08324	6	7	5	937	105.04	5.35				1.103	1.393	1.241	1.37	1.147	0.779	1.302	0.965		227.8	200.1	251.3	317.3	334.2	282.6	312	247.8	261.2	256.7
Q9QY81	Nup210	PE	Nuclear pore membrane glycoprotein 210 OS=Mus musculus GN=Nup210 PE=1 SV=2	3.23436	6	6	6	1886	203.973	6.65				1.307	1.329	1.324	1.051	1.492	0.661	0.984	0.819		191.9	213.8	250.9	255.2	318.4	254	201.8	264.9	286.4	323.5
Q6PAQ4	Rexo4	PE	RNA exonuclease 4 OS=Mus musculus GN=Rexo4 PE=2 SV=2	16.4352	8	8	8	432	47.569	9.91				1.072	0.832	1.199	0.943	0.988	1.144	3.674	1.159		233.7	267	250.5	194.6	857.3	280.2	220.4	270.4	230.9	233.3
P49312	Hnrnpa1	PE	Heterogeneous nuclear ribonucleoprotein A1 OS=Mus musculus GN=Hnrnpa1 PE=1 SV=2	24.375	6	11	5	320	34.175	9.23				1.175	0.958	1.365	1.538	1.488	0.863	2.107	0.798		213	208.2	250.2	204.1	508.1	290.8	327.5	192.5	317	241.2
Q6P069	Sri	PE	Sorcin OS=Mus musculus GN=Sri PE=1 SV=1	20.202	4	6	4	198	21.613	5.59				1.639	1.823	1.66	0.906	2.371	1.117	0.574	0.426		152.5	291.1	249.9	278	149.5	253.1	138.1	110.9	361.6	260.5
Q8C052	Map1s	PE	Microtubule-associated protein 1S OS=Mus musculus GN=Map1s PE=1 SV=2	2.67215	3	3	3	973	102.875	7.02				1.233	1.252	0.918	0.993	1.268	1.03	0.928	0.796		202.8	187.7	249.9	253.8	169	186.1	201.3	145	257.1	182.1
Q91WL8	Wwox	PE	WW domain-containing oxidoreductase OS=Mus musculus GN=Wwox PE=1 SV=1	9.42029	3	4	3	414	46.483	7.02				0.825	1.062	0.785	1.184	1	0.773	0.615	0.836		302	236.8	249.2	320.7	188.5	237.1	357.5	256.2	302	306.4
Q8BGD9	Eif4b	PE	Eukaryotic translation initiation factor 4B OS=Mus musculus GN=Eif4b PE=1 SV=1	9.1653	4	6	4	611	68.799	5.67				0.654	0.797	0.656	0.732	0.935	0.918	0.648	0.892		380.8	264	249.1	303.5	186.4	249.7	278.8	256.5	356	287.5
P04919	Slc4a1	PE	Band 3 anion transport protein OS=Mus musculus GN=Slc4a1 PE=1 SV=1	4.41335	4	4	4	929	103.07	5.45				1.022	0.644	0.473	0.736	1.189	0.74	0.301	0.415		243.7	274.8	249	156.9	111.8	115.4	179.3	154	289.7	371.4
P62482	Kcnab2	PE	Voltage-gated potassium channel subunit beta-2 OS=Mus musculus GN=Kcnab2 PE=1 SV=1	6.53951	3	4	3	367	40.995	9				1.253	1.164	1.46	1.102	2.371	0.944	0.656	0.549		198.2	281.3	248.4	230.7	195.4	289.4	218.5	163.4	470	297.9
Q9JI44	Dmap1	PE	DNA methyltransferase 1-associated protein 1 OS=Mus musculus GN=Dmap1 PE=1 SV=1	13.4615	6	7	6	468	53.097	9.5				0.802	1.047	0.768	1.064	0.846	0.994	0.949	1.085		308.8	248.1	247.5	323.3	236.8	237.1	328.6	270.9	261.4	249.6
Q9QYJ0	Dnaja2	PE	DnaJ homolog subfamily A member 2 OS=Mus musculus GN=Dnaja2 PE=1 SV=1	5.58252	3	3	3	412	45.717	6.48				1.227	0.817	1.35	1.008	1.768	1.105	0.914	1.007		200.8	271.7	246.5	164.1	224.8	271.1	202.5	247.5	355.2	245.9
O70152	Dpm1	PE	Dolichol-phosphate mannosyltransferase subunit 1 OS=Mus musculus GN=Dpm1 PE=1 SV=1	23.4615	6	7	6	260	29.156	9.51				0.885	1.331	0.917	1.196	0.969	0.867	3.462	0.877		278.1	237.9	245.9	370	950	254.9	332.5	240.6	269.6	274.4
Q9ERU3	Znf22	PE	Zinc finger protein 22 OS=Mus musculus GN=Znf22 PE=1 SV=2	24.4726	6	10	6	237	27.277	10.29				0.904	1.553	1.055	1.053	1.025	1.161	2.044	1.418		271.4	272.6	245.4	421.4	479.7	286.2	285.8	332.8	278	234.7
O89100	Grap2	PE	GRB2-related adaptor protein 2 OS=Mus musculus GN=Grap2 PE=1 SV=1	19.8758	5	6	5	322	36.787	6.58				1.541	1.137	1.432	0.983	1.701	0.967	0.676	0.855		159	205.5	245	180.9	143.6	227.8	156.4	181.7	270.6	212.5
Q9CRA7	Atp5s	PE	ATP synthase subunit s, mitochondrial OS=Mus musculus GN=Atp5s PE=1 SV=1	4	1	2	1	200	23.26	8.06				1.763	0.841	1.843	0.802	2.069	2.022	1.53	3.785		138.9	232.6	244.9	116.8	176	256	111.4	435.4	287.3	115
Q9CSN1	Snw1	PE	SNW domain-containing protein 1 OS=Mus musculus GN=Snw1 PE=1 SV=3	8.39552	4	6	4	536	61.438	9.48				0.945	1.166	1.189	1.175	1.013	0.79	1.485	0.813		257.8	241	243.6	300.6	453.2	306.6	303.1	248.1	261.3	305.2
Q9CZD3	Gars	PE	Glycine--tRNA ligase OS=Mus musculus GN=Gars PE=1 SV=1	6.44719	5	5	5	729	81.826	6.65				1.008	1.054	1.151	1.2	1.625	0.966	0.743	0.848		241.3	259.9	243.1	254.2	200	277.7	289.5	228.3	392	269.2
Q99JI4	Psmd6	PE	26S proteasome non-ATPase regulatory subunit 6 OS=Mus musculus GN=Psmd6 PE=1 SV=1	4.11311	2	3	2	389	45.507	5.52				1.143	1.083	1.352	1.047	1.723	1.005	0.801	1.053		212.6	265.7	243	230.2	211.8	287.4	222.6	278.4	366.3	264.3
Q6ZWV7	Rpl35	PE	60S ribosomal protein L35 OS=Mus musculus GN=Rpl35 PE=1 SV=1	8.13008	1	2	2	123	14.544	11.05				1.485	1.17	1.113	0.816	0.903	0.658	1.906	0.788		163.5	122.8	242.9	191.4	355.8	182	133.5	147.2	147.7	186.7
Q99ME9	Gtpbp4	PE	Nucleolar GTP-binding protein 1 OS=Mus musculus GN=Gtpbp4 PE=1 SV=3	9.14826	5	5	5	634	74.066	9.52				0.951	0.883	0.866	0.869	0.98	0.916	1.26	0.888		255.2	206.3	242.9	225.5	283.7	220.9	221.8	199.9	250	225.2
Q9Z0X1	Aifm1	PE	Apoptosis-inducing factor 1, mitochondrial OS=Mus musculus GN=Aifm1 PE=1 SV=1	8.66013	6	7	6	612	66.724	9.17				0.911	1.136	1.121	0.922	1.357	0.959	1.091	1.179		265.5	290.9	241.9	301.5	330.7	297.7	244.8	357.6	360.2	303.3
P68372	Tubb4b	PE	Tubulin beta-4B chain OS=Mus musculus GN=Tubb4b PE=1 SV=1	42.4719	15	44	5	445	49.799	4.89				1.144	0.935	1.107	1.489	1.429	0.846	0.76	0.843		211.3	216.4	241.8	197.5	194.4	234	314.6	215.7	302	255.7
P17710	Hk1	PE	Hexokinase-1 OS=Mus musculus GN=Hk1 PE=1 SV=3	5.74949	5	6	5	974	108.234	6.8				1.022	0.926	0.972	0.767	1.564	1.09	0.694	0.667		236.1	278.2	241.2	218.7	177	229.5	181.1	170.2	369.4	255.3
Q80UM7	Mogs	PE	Mannosyl-oligosaccharide glucosidase OS=Mus musculus GN=Mogs PE=1 SV=1	4.79616	4	5	4	834	91.774	9				0.681	0.676	0.805	0.706	0.968	0.803	1.94	1.616		353.8	239.9	241	239.1	579	284.7	249.9	482.4	342.4	298.5
P25799	Nfkb1	PE	Nuclear factor NF-kappa-B p105 subunit OS=Mus musculus GN=Nfkb1 PE=1 SV=2	2.47168	3	4	3	971	105.549	5.39				1.271	1.186	1.489	1.119	2.03	0.939	0.807	0.801		189.7	230.3	241	225	197.8	282.5	212.1	196.5	384.9	245.2
Q922P9	Glyr1	PE	Putative oxidoreductase GLYR1 OS=Mus musculus GN=Glyr1 PE=1 SV=1	11.1722	5	6	5	546	59.678	9.22				1.094	0.94	0.988	1.172	1.011	0.449	0.887	0.533		220	194.9	240.7	206.9	385	217.3	257.9	231.5	222.5	433.9
Q9CQ65	Mtap	PE	S-methyl-5'-thioadenosine phosphorylase OS=Mus musculus GN=Mtap PE=1 SV=1	12.7208	3	3	3	283	31.042	7.14				1.45	1.044	1.677	0.801	2.362	1.188	1.027	0.782		166	247	240.6	173.2	213.5	278.3	132.9	162.6	392	207.9
Q99MD9	Nasp	PE	Nuclear autoantigenic sperm protein OS=Mus musculus GN=Nasp PE=1 SV=2	8.15006	6	6	6	773	83.903	4.37				0.956	2.526	0.907	1.083	1.216	1.483	0.648	0.93		251.4	425.3	240.2	634.9	185.8	227.9	272.2	266.9	305.8	286.8
Q9CY50	Ssr1	PE	Translocon-associated protein subunit alpha OS=Mus musculus GN=Ssr1 PE=1 SV=1	8.04196	2	4	2	286	32.045	4.45				0.771	0.57	0.696	0.41	0.925	1.025	0.851	0.907		310.5	230.8	239.5	177	191.6	216.1	127.4	204.2	287.2	225.2
Q99J77	Nans	PE	Sialic acid synthase OS=Mus musculus GN=Nans PE=1 SV=1	9.47075	3	3	3	359	39.998	7.06				1.247	1.036	1.31	0.962	2.246	1.017	0.709	0.623		191.8	256.8	239.1	198.6	179.1	251.2	184.6	157.3	430.8	252.5
B2RXR6	Ankrd44	PE	Serine/threonine-protein phosphatase 6 regulatory ankyrin repeat subunit B OS=Mus musculus GN=Ankrd44 PE=1 SV=1	4.22961	4	5	4	993	107.317	6.42				0.973	1.124	1.186	1.236	1.356	0.814	0.743	0.991		245.4	205.6	238.9	275.8	187.5	291	303.4	250.2	332.8	252.5
Q9CXY6	Ilf2	PE	Interleukin enhancer-binding factor 2 OS=Mus musculus GN=Ilf2 PE=1 SV=1	10.7692	4	5	4	390	43.035	5.26				1.03	1.327	1.033	1.318	1.13	0.721	0.708	0.737		231.8	222.4	238.8	307.6	218.4	239.6	305.5	227.3	262	308.5
Q9CR16	Ppid	PE	Peptidyl-prolyl cis-trans isomerase D OS=Mus musculus GN=Ppid PE=1 SV=3	4.32432	2	2	2	370	40.717	7.43				1.486	1.055	1.463	1.221	2.731	0.958	0.638	1.244		160.7	239.1	238.7	169.5	159.3	235	196.2	310.6	438.9	249.6
Q8BQ46	Taf15	PE	Putative uncharacterized protein OS=Mus musculus GN=Taf15 PE=1 SV=1	14.9013	6	7	4	557	58.566	8.4				0.664	0.6	0.652	0.852	0.884	0.663	1.894	0.882		358.4	227	238	215	649.1	233.7	305.3	302.3	316.8	342.6
Q8K2V6	Ipo11	PE	Importin-11 OS=Mus musculus GN=Ipo11 PE=1 SV=1	1.4359	2	2	2	975	112.344	5.26				0.802	1.75	1.067	0.583	0.589	1.013	0.697	0.622		296.6	262.3	237.9	519	180.6	316.6	173	161.2	174.6	259
Q60631	Grb2	PE	Growth factor receptor-bound protein 2 OS=Mus musculus GN=Grb2 PE=1 SV=1	22.5806	5	5	5	217	25.222	6.32				1.512	1.064	1.873	1.184	2.255	1.083	0.694	0.674		156.8	199.6	237.1	166.9	127.9	293.8	185.7	124.2	353.7	184.3
Q91V41	Rab14	PE	Ras-related protein Rab-14 OS=Mus musculus GN=Rab14 PE=1 SV=3	24.186	5	6	4	215	23.882	6.21				0.953	0.901	1.046	1.019	1.308	1.131	0.845	0.788		248.1	270.6	236.6	223.6	202.2	259.5	252.9	188.6	324.5	239.4
Q61164	Ctcf	PE	Transcriptional repressor CTCF OS=Mus musculus GN=Ctcf PE=1 SV=2	6.11413	6	6	6	736	83.692	6.9				0.935	1.117	1.023	1.141	1.218	0.841	1.066	1.186		252.5	211	236.1	282.1	267.6	258.4	288	297.8	307.5	251
Q3TBT3	Tmem173	PE	Stimulator of interferon genes protein OS=Mus musculus GN=Tmem173 PE=1 SV=2	10.582	4	5	4	378	42.802	7.42				1.223	1.147	1.516	0.951	1.581	0.902	0.992	0.77		193	217.6	236	221.5	239.3	292.6	183.7	185.7	305.2	241.2
Q8R379	Gimap7	PE	GTPase, IMAP family member 7 OS=Mus musculus GN=Gimap7 PE=1 SV=1	17.4061	6	7	5	293	33.817	8.19				0.867	1.052	1.143	0.92	1.234	0.967	0.953	0.749		271.7	267.7	235.6	285.8	263.9	310.5	249.9	207.5	335.2	276.9
Q3UL36	Arglu1	PE	Arginine and glutamate-rich protein 1 OS=Mus musculus GN=Arglu1 PE=1 SV=2	7.38007	3	3	3	271	32.868	10.36				1.229	1.367	1.292	1.179	1.735	0.987	1.621	1.114		189.8	209.5	233.3	259.4	344	245.2	223.8	236.4	329.3	212.2
Q9EQH2	Erap1	PE	Endoplasmic reticulum aminopeptidase 1 OS=Mus musculus GN=Erap1 PE=1 SV=2	4.62366	4	4	4	930	106.531	6.2				1.025	0.99	0.979	0.87	1.48	0.955	0.587	0.887		227.5	243.5	233.2	225.3	149.7	222.8	197.9	226	336.7	254.9
Q62418	Dbnl	PE	Drebrin-like protein OS=Mus musculus GN=Dbnl PE=1 SV=2	16.7431	6	6	6	436	48.67	4.92				1.099	1.117	0.936	0.97	1.705	1.023	0.65	0.792		212.1	229.4	233	237	145.8	198.4	205.7	177.6	361.5	224.3
P46467	Vps4b	PE	Vacuolar protein sorting-associated protein 4B OS=Mus musculus GN=Vps4b PE=1 SV=2	11.7117	5	5	3	444	49.389	7.11				1.058	1.064	1.168	1.096	1.644	1.009	1.341	0.773		219.2	261.2	232	233.4	347.2	256.2	240.4	200	360.4	258.9
Q8BTS3	Gbp9	PE	Guanylate-binding protein 9 OS=Mus musculus GN=Gbp9 PE=1 SV=1	7.10824	5	6	4	619	71.296	5.97				0.906	1.018	0.997	0.803	1.276	0.864	0.648	0.692		255.1	247.1	231	259.7	185.5	254.2	204.9	197.8	325.5	286.1
Q8QZY1	Eif3l	PE	Eukaryotic translation initiation factor 3 subunit L OS=Mus musculus GN=Eif3l PE=1 SV=1	7.80142	4	4	4	564	66.57	6.44				1.29	1.142	1.126	1.276	1.483	0.908	0.706	0.81		178.7	206.2	230.6	204	160.4	201.1	228.1	183.9	264.9	227
O55023	Impa1	PE	Inositol monophosphatase 1 OS=Mus musculus GN=Impa1 PE=1 SV=1	14.8014	4	6	4	277	30.416	5.19				1.539	1.232	1.65	0.849	2.513	1.107	0.728	0.726		149.7	219.5	230.4	184.4	144.4	247	127.1	144	376.2	198.3
Q80TL7	Mon2	PE	Protein MON2 homolog OS=Mus musculus GN=Mon2 PE=1 SV=2	1.39942	3	4	3	1715	188.958	6.13				0.789	1.465	1.368	0.629	0.646	0.888	0.769	0.602		290.4	247	229	425.5	214.1	397.2	182.5	167.4	187.8	278.2
P68510	Ywhah	PE	14-3-3 protein eta OS=Mus musculus GN=Ywhah PE=1 SV=2	34.9593	9	17	4	246	28.194	4.89				1.248	1.186	1.569	1.037	1.898	0.957	0.886	0.721		183.1	242.1	228.5	217	224.1	287.2	189.9	182.3	347.6	252.9
O55234	Psmb5	PE	Proteasome subunit beta type-5 OS=Mus musculus GN=Psmb5 PE=1 SV=3	7.95455	2	2	2	264	28.514	7.02				0.696	0.7	0.875	0.796	0.838	1.135	1.254	1.063		327.7	312	228.1	229.3	344.7	286.6	260.7	292.1	274.7	274.8
Q9EPU0	Upf1	PE	Regulator of nonsense transcripts 1 OS=Mus musculus GN=Upf1 PE=1 SV=2	3.38078	4	4	4	1124	123.889	6.61				0.907	1.101	0.695	0.78	1.012	1.094	0.81	0.841		250.9	229	227.6	276.2	169.5	174.5	195.7	175.9	253.9	209.3
Q8K4Z5	Sf3a1	PE	Splicing factor 3A subunit 1 OS=Mus musculus GN=Sf3a1 PE=1 SV=1	6.57396	5	6	5	791	88.489	5.22				1.145	1.444	1.168	1.077	1.497	0.772	0.795	0.803		197.9	169.8	226.6	285.7	174.8	231.1	213.2	176.6	296.4	219.9
Q91XR9	Gpx4	PE	Phospholipid hydroperoxide glutathione peroxidase, nuclear OS=Mus musculus GN=Gpx4 PE=1 SV=3	13.4387	3	5	3	253	29.234	10.2				0.995	0.815	0.969	0.747	1.031	1.15	1.029	1.135		227.3	227.6	226.3	185.3	203.7	220.3	169.9	224.6	234.3	197.9
Q6Q899	Ddx58	PE	Probable ATP-dependent RNA helicase DDX58 OS=Mus musculus GN=Ddx58 PE=1 SV=2	5.93952	5	5	5	926	105.908	6.65				0.866	0.911	0.928	0.866	1.041	0.61	0.616	0.841		261.1	183	226	237.8	184.8	242.2	226	252.3	271.9	299.9
Q8C3R1	Brat1	PE	BRCA1-associated ATM activator 1 OS=Mus musculus GN=Brat1 PE=1 SV=1	7.78589	6	7	6	822	89.029	5.31				0.711	1.219	1.17	0.493	0.5	1.071	0.692	0.56		316.7	285.6	225	386	184.6	370.4	156.1	149.5	158.2	266.8
Q9CW03	Smc3	PE	Structural maintenance of chromosomes protein 3 OS=Mus musculus GN=Smc3 PE=1 SV=2	3.45111	5	6	5	1217	141.468	7.18				1.223	1.219	1.234	1.559	1.451	0.746	0.856	0.791		183.9	192.5	224.9	224.1	220.9	226.8	286.6	204.2	266.7	258.1
B1AR17	Chd3	PE	Chromodomain helicase DNA-binding protein 3 OS=Mus musculus GN=Chd3 PE=1 SV=1	4.03893	9	13	4	2055	232.6	6.27				0.706	0.972	0.838	0.901	0.715	0.918	0.915	1.149		317.2	222	224.1	308.3	221.3	265.8	285.9	277.9	226.9	241.9
Q68FL6	Mars	PE	Methionine--tRNA ligase, cytoplasmic OS=Mus musculus GN=Mars PE=1 SV=1	2.54989	3	3	3	902	101.366	7.14				1.223	1.106	1.276	1.075	1.825	0.957	0.779	0.866		182.6	197.7	223.3	201.9	160.9	232.9	196.3	179	333.3	206.6
Q8JZQ9	Eif3b	PE	Eukaryotic translation initiation factor 3 subunit B OS=Mus musculus GN=Eif3b PE=1 SV=1	5.23039	4	5	4	803	91.313	5.02				1	0.923	0.938	1.6	1.2	0.89	0.626	0.765		223.1	213.9	223.2	205.9	150.4	209.2	357.1	183.9	267.7	240.3
D3Z0M9	Ddx23	PE	DEAD (Asp-Glu-Ala-Asp) box polypeptide 23 OS=Mus musculus GN=Ddx23 PE=1 SV=1	5.00611	4	4	4	819	95.436	9.58				1.026	1.197	1.328	1.022	1.595	1.301	1.19	0.98		216.8	250.1	222.4	259.6	228.8	288	221.5	188.4	345.8	192.3
P01901	H2-K1	PE	H-2 class I histocompatibility antigen, K-B alpha chain OS=Mus musculus GN=H2-K1 PE=1 SV=1	20.3252	6	10	4	369	41.276	6.39				0.972	0.886	0.888	0.819	1.278	0.574	0.474	0.54		228.6	182.8	222.2	202.6	150.9	203	187.2	171.9	292.3	318.5
O08529	Capn2	PE	Calpain-2 catalytic subunit OS=Mus musculus GN=Capn2 PE=1 SV=4	5.57143	4	4	3	700	79.822	4.96				0.832	1.071	0.823	1.244	1.107	0.846	1.056	1.214		266	206.7	221.3	284.8	257.9	218.9	330.9	296.5	294.6	244.3
Q7M6X3	Zfp759	PE	Regulator of sex-limitation candidate 8 OS=Mus musculus GN=Zfp759 PE=2 SV=1	1.66436	1	1	1	721	82.801	9.5				1.124	0.422	0.704	0.654	0.552	1.127	0.507	0.799		196.7	221.9	221	83.1	99.8	138.5	128.7	157.2	108.6	196.9
P11031	Sub1	PE	Activated RNA polymerase II transcriptional coactivator p15 OS=Mus musculus GN=Sub1 PE=1 SV=3	26.7717	4	6	4	127	14.418	9.6				1.357	1.243	1.435	1.185	1.509	1.136	1.241	0.613		161.5	260.8	219.2	200.7	284.8	231.8	191.3	140.8	243.7	229.6
P70315	Was	PE	Wiskott-Aldrich syndrome protein homolog OS=Mus musculus GN=Was PE=1 SV=1	2.5	2	2	2	520	54.158	6.7				1.24	1.121	1.479	0.913	1.933	0.992	0.707	0.711		176.1	234.1	218.4	197.4	166.7	260.4	160.7	167.7	340.4	235.9
Q8K4I3	Arhgef6	PE	Rho guanine nucleotide exchange factor 6 OS=Mus musculus GN=Arhgef6 PE=1 SV=1	3.76135	3	3	3	771	86.996	5.87				1.4	1.175	1.37	1.051	1.939	0.922	0.737	1.001		155.3	178	217.4	182.5	142.4	212.8	163.2	193.3	301.2	193.1
P97315	Csrp1	PE	Cysteine and glycine-rich protein 1 OS=Mus musculus GN=Csrp1 PE=1 SV=3	27.9793	3	6	3	193	20.57	8.57				0.884	0.864	1.066	1.192	0.999	1.103	5.792	1.259		244	225.5	215.8	210.9	1184.4	260.2	290.9	257.4	243.9	204.5
P24161	Cd247	PE	T-cell surface glycoprotein CD3 zeta chain OS=Mus musculus GN=Cd247 PE=1 SV=1	24.3902	3	3	3	164	18.626	9.28				1.591	1.114	1.419	1.342	1.138	1.102	0.904	1		135.4	202.3	215.5	150.8	165.9	192.2	181.8	183.5	154	183.5
P27870	Vav1	PE	Proto-oncogene vav OS=Mus musculus GN=Vav1 PE=1 SV=1	3.07692	3	3	3	845	98.074	6.51				1.554	1.256	1.533	0.875	2.097	1.256	0.96	1.073		138.6	210.9	215.4	174.2	161.2	212.6	121.3	180.1	290.7	167.9
Q8R326	Pspc1	PE	Paraspeckle component 1 OS=Mus musculus GN=Pspc1 PE=1 SV=1	13.0019	8	8	5	523	58.721	6.67				0.796	1.088	0.944	0.897	1.132	0.972	1.609	0.773		270.7	298.1	215.4	294.6	493.4	255.4	242.8	237.1	306.4	306.7
P42227	Stat3	PE	Signal transducer and activator of transcription 3 OS=Mus musculus GN=Stat3 PE=1 SV=2	5.71429	4	4	4	770	87.997	6.3				1.135	1.143	1.341	1.177	1.651	0.948	0.832	0.859		188.8	226.4	214.3	215.8	198.8	253.2	222.3	205.2	311.8	238.8
Q8C147	Dock8	PE	Dedicator of cytokinesis protein 8 OS=Mus musculus GN=Dock8 PE=1 SV=4	3	6	6	6	2100	238.826	6.96				0.895	1.355	1.081	0.794	1.327	0.863	0.809	1.014		238.9	213.1	213.9	323.6	199.7	258.2	189.8	250.3	317.1	246.9
Q8K363	Ddx18	PE	ATP-dependent RNA helicase DDX18 OS=Mus musculus GN=Ddx18 PE=1 SV=1	5	4	4	4	660	74.134	9.52				1.054	1.528	1.433	1.017	1.183	0.89	2.623	0.761		202.3	213.1	213.2	309.2	628.2	290	205.7	182.3	239.4	239.5
A0A140T8K6	Rpl36-ps3	PE	60S ribosomal protein L36 OS=Mus musculus GN=Rpl36-ps3 PE=3 SV=1	20.9524	3	3	3	105	12.248	11.4				1.339	1.336	1.356	0.72	1.191	1.6	1.621	1.255		159	196.5	213	212.5	199.1	215.6	114.5	154.1	189.4	122.8
Q9QZD4	Ercc4	PE	DNA repair endonuclease XPF OS=Mus musculus GN=Ercc4 PE=1 SV=3	6.76118	6	7	6	917	103.625	7.71				0.866	1.443	0.842	1.04	0.809	0.961	0.671	1.11		245.5	214	212.7	354.4	149.3	206.6	255.3	247	198.6	222.6
Q922U1	Prpf3	PE	U4/U6 small nuclear ribonucleoprotein Prp3 OS=Mus musculus GN=Prpf3 PE=1 SV=1	4.39239	3	4	3	683	77.407	9.5				0.918	1.293	1.076	1.276	1.177	0.839	0.788	0.875		231.2	230.1	212.3	298.9	216.3	248.7	295.1	240.1	272.1	274.4
Q9JIF0	Prmt1	PE	Protein arginine N-methyltransferase 1 OS=Mus musculus GN=Prmt1 PE=1 SV=1	14.5553	4	4	4	371	42.408	5.43				0.806	0.916	1.051	0.896	1.234	1.077	1.023	0.815		262.1	241.2	211.3	240	229.1	275.5	234.9	182.5	323.4	224
Q8C4Y3	Nelfb	PE	Negative elongation factor B OS=Mus musculus GN=Nelfb PE=1 SV=2	3.96552	3	3	3	580	65.594	6.02				0.835	1.526	1.209	0.755	0.862	0.995	0.737	0.59		252.9	255.5	211.2	386	189.4	305.7	190.9	151.5	217.9	256.9
P32020	Scp2	PE	Non-specific lipid-transfer protein OS=Mus musculus GN=Scp2 PE=1 SV=3	4.38757	3	3	3	547	59.088	7.44				0.482	0.647	0.773	0.654	0.701	0.846	1.068	0.482		437.5	209.5	210.7	283	264.4	338.2	286	119.2	306.7	247.6
P39054	Dnm2	PE	Dynamin-2 OS=Mus musculus GN=Dnm2 PE=1 SV=2	6.89655	5	5	5	870	98.084	7.43				1.241	1.132	0.978	1.119	1.346	0.832	0.562	0.769		169.5	184.4	210.5	191.9	124.6	165.8	189.7	170.6	228.3	221.7
O70566	Diaph2	PE	Protein diaphanous homolog 2 OS=Mus musculus GN=Diaph2 PE=1 SV=2	0.910747	1	8	1	1098	124.792	6.92				2.018	1.593	1.935	0.773	1.975	1.814	1.661	2.201		104.2	207.1	210.2	166	189.7	201.6	80.5	251.3	205.8	114.2
Q9JLQ2	Git2	PE	ARF GTPase-activating protein GIT2 OS=Mus musculus GN=Git2 PE=1 SV=2	6.35593	5	6	5	708	78.717	7.72				1.191	1.053	1.211	1.161	1.637	0.845	0.815	0.969		176.2	174.8	209.8	185.6	168.7	213.4	204.5	200.5	288.3	206.9
Q9ESW4	Agk	PE	Acylglycerol kinase, mitochondrial OS=Mus musculus GN=Agk PE=1 SV=1	10.9264	5	6	5	421	46.946	8.4				0.79	0.856	0.943	1.286	1.109	0.362	1.686	0.372		261.2	205.1	206.5	223.7	955.6	246.5	335.9	210.9	289.8	566.7
P11247	Mpo	PE	Myeloperoxidase OS=Mus musculus GN=Mpo PE=1 SV=2	11.0028	7	9	7	718	81.13	9.55				0.855	1.534	1.684	5.958	1.876	0.717	0.966	0.779		241.3	194.2	206.3	370.2	261.8	406.3	1437.8	211.1	452.6	271
G3UXL2	Prps1l3	PE	Phosphoribosyl pyrophosphate synthetase 1-like 3 OS=Mus musculus GN=Prps1l3 PE=3 SV=1	11.0063	4	5	2	318	34.802	6.98				1.344	1.382	1.496	0.939	2.436	1.028	0.891	0.67		153.6	229.3	206.3	212.3	198.6	229.8	144.2	149.4	374.2	223
Q9JKP5	Mbnl1	PE	Muscleblind-like protein 1 OS=Mus musculus GN=Mbnl1 PE=1 SV=1	13.783	5	6	5	341	36.951	8.6				1.086	0.844	1.176	1.436	1.62	0.868	5.341	0.905		189.3	204.3	205.6	159.8	1256.8	222.7	272	212.9	306.7	235.3
P51175	Ppox	PE	Protoporphyrinogen oxidase OS=Mus musculus GN=Ppox PE=1 SV=1	10.0629	5	5	5	477	50.839	8.84				0.739	1.346	1.049	1.258	0.978	0.6	1.196	0.907		277.1	195.7	204.7	373	389.7	290.8	348.5	295.7	270.9	325.9
Q91VW3	Sh3bgrl3	PE	SH3 domain-binding glutamic acid-rich-like protein 3 OS=Mus musculus GN=Sh3bgrl3 PE=1 SV=1	26.8817	3	4	3	93	10.47	5.14				1.172	1.013	1.382	0.657	2.207	1.068	0.478	0.66		174.2	278.2	204.2	176.4	124.4	240.7	114.5	172	384.5	260.5
P24547	Impdh2	PE	Inosine-5'-monophosphate dehydrogenase 2 OS=Mus musculus GN=Impdh2 PE=1 SV=2	5.25292	3	3	3	514	55.78	7.28				1.03	1.225	1.078	1.028	1.415	1.117	0.981	0.635		198.2	243.4	204.2	242.8	213.7	213.7	203.8	138.5	280.4	217.9
Q60872	Eif1a	PE	Eukaryotic translation initiation factor 1A OS=Mus musculus GN=Eif1a PE=2 SV=3	20.1389	3	3	3	144	16.492	5.24				0.915	1.022	1.119	0.939	1.255	0.963	1.358	0.818		222.6	232	203.8	227.4	327.1	249.2	209	197	279.5	240.9
P05132	Prkaca	PE	cAMP-dependent protein kinase catalytic subunit alpha OS=Mus musculus GN=Prkaca PE=1 SV=3	9.68661	4	4	4	351	40.545	8.79				1.416	1.118	1.519	1.163	2.299	0.78	0.688	0.593		143.9	191.9	203.7	160.9	169.3	218.5	167.4	146	330.8	246.1
P05201	Got1	PE	Aspartate aminotransferase, cytoplasmic OS=Mus musculus GN=Got1 PE=1 SV=3	16.707	6	8	6	413	46.219	7.14				1.326	0.857	1.339	0.623	2.38	1.174	0.569	0.583		153.6	238.9	203.6	131.7	115.8	205.7	95.7	118.6	365.5	203.5
Q9QZE5	Copg1	PE	Coatomer subunit gamma-1 OS=Mus musculus GN=Copg1 PE=1 SV=1	7.20824	5	6	5	874	97.45	5.35				0.902	1.393	0.889	0.959	1.177	1.265	0.778	0.933		225	263.8	202.9	313.5	162.2	200	215.8	194.5	264.8	208.5
Q5HZI9	Slc25a51	PE	Solute carrier family 25 member 51 OS=Mus musculus GN=Slc25a51 PE=1 SV=1	9.0604	3	3	3	298	33.668	9.66				0.578	0.781	0.737	0.66	0.617	0.841	1.463	0.753		351.1	232.5	202.8	274	404.7	258.9	231.9	208.2	216.7	276.6
Q99JX7	Nxf1	PE	Nuclear RNA export factor 1 OS=Mus musculus GN=Nxf1 PE=1 SV=3	11.6505	6	6	6	618	70.256	8.73				0.947	0.959	1.048	1.157	1.185	0.842	2.103	0.894		213.4	194.5	202.1	204.6	485.5	223.6	246.9	206.4	253	230.9
Q99KD5	Unc45a	PE	Protein unc-45 homolog A OS=Mus musculus GN=Unc45a PE=1 SV=2	2.86017	3	3	3	944	103.382	6.34				0.855	1.1	1.088	0.706	0.791	0.878	0.674	0.716		235.7	203.8	201.6	259.3	156.4	256.5	166.5	166.3	186.5	232.2
O55128	Sap18	PE	Histone deacetylase complex subunit SAP18 OS=Mus musculus GN=Sap18 PE=1 SV=1	19.6078	4	4	4	153	17.584	9.35				1.186	1.201	1.241	1.212	1.041	0.663	0.909	0.736		169.8	147.4	201.3	203.9	202.1	210.7	205.8	163.6	176.7	222.2
Q9CRB2	Nhp2	PE	H/ACA ribonucleoprotein complex subunit 2 OS=Mus musculus GN=Nhp2 PE=1 SV=1	18.9542	3	3	3	153	17.236	8.41				1.355	0.976	0.962	1.338	1.335	0.726	1.719	0.832		148.6	120.8	201.2	145	286.3	142.9	198.8	138.6	198.3	166.5
Q8R313	Exoc6	PE	Exocyst complex component 6 OS=Mus musculus GN=Exoc6 PE=1 SV=2	3.2419	3	3	3	802	93.017	6.15				0.794	1.089	1.049	0.607	0.562	0.769	0.543	0.483		252.7	218	200.7	275.1	154	265	153.3	136.9	142	283.4
P70399	Tp53bp1	PE	Tumor suppressor p53-binding protein 1 OS=Mus musculus GN=Tp53bp1 PE=1 SV=2	1.27747	3	3	3	1957	211.209	4.63				0.794	1.017	0.737	1.213	0.834	0.754	0.665	1.023		252.5	153.2	200.6	256.9	135.2	186.1	306.4	207.8	210.5	203.1
D3Z5N9	Gm5449	PE	MCG49198 OS=Mus musculus GN=Gm5449 PE=4 SV=1	14.4068	2	2	2	118	13.537	9.69				1.252	2.385	1.283	1.162	1.594	0.9	0.982	0.964		160.2	177.4	200.5	382.1	193.6	205.5	186.2	189.9	255.4	197
Q9JHI5	Ivd	PE	Isovaleryl-CoA dehydrogenase, mitochondrial OS=Mus musculus GN=Ivd PE=1 SV=1	8.49057	4	4	4	424	46.296	8.29				0.814	0.93	1.057	0.868	1.249	0.942	0.666	0.732		245.7	238.4	200.1	228.6	168.6	259.8	213.2	185.1	306.9	253.1
Q8VDP6	Cdipt	PE	CDP-diacylglycerol--inositol 3-phosphatidyltransferase OS=Mus musculus GN=Cdipt PE=1 SV=1	10.7981	3	3	3	213	23.583	8.27				1.146	1.22	1.427	0.956	1.381	1.223	1.922	1.063		174.2	217.6	199.8	212.5	342	248.6	166.6	189.2	240.6	177.9
Q9Z1G3	Atp6v1c1	PE	V-type proton ATPase subunit C 1 OS=Mus musculus GN=Atp6v1c1 PE=1 SV=4	8.37696	3	3	3	382	43.86	7.46				0.886	0.94	0.906	1.01	1.049	0.855	0.588	0.657		225.1	203.9	199.4	211.6	140.3	203.8	227.4	156.6	236.1	238.5
O08583	Alyref	PE	THO complex subunit 4 OS=Mus musculus GN=Alyref PE=1 SV=3	41.1765	8	15	8	255	26.924	11.15				0.929	1.022	1.156	1.462	1.04	1.041	4.9	1.098		214.2	220.2	199	218.9	1036.1	247.6	313.3	232.1	222.9	211.5
Q7TPC1	Cdsn	PE	Corneodesmosin OS=Mus musculus GN=Cdsn PE=2 SV=2	1.60428	1	2	1	561	54.28	9.28				0.942	0.78	1.489	1.186	0.748	1.065	0.552	1.204		210.2	241.2	198.1	164	125	312.9	249.4	272.7	157.3	226.6
A2AN08	Ubr4	PE	E3 ubiquitin-protein ligase UBR4 OS=Mus musculus GN=Ubr4 PE=1 SV=1	0.637066	4	4	4	5180	571.927	6.06				0.857	0.934	1.098	0.926	1.08	0.887	0.817	0.81		229.2	207.6	196.4	214	191.2	251.6	212.3	189.6	247.4	234
Q9CXW3	Cacybp	PE	Calcyclin-binding protein OS=Mus musculus GN=Cacybp PE=1 SV=1	10.4803	3	3	2	229	26.494	7.87				1.471	1.114	1.421	0.794	2.109	1.507	0.98	1.438		133.4	224	196.2	148.6	145.7	189.6	105.8	213.6	281.3	148.6
Q9DCN2	Cyb5r3	PE	NADH-cytochrome b5 reductase 3 OS=Mus musculus GN=Cyb5r3 PE=1 SV=3	14.2857	3	5	3	301	34.106	8.38				1.425	1.445	1.465	0.375	1.363	1.279	1.002	1.236		137.1	195.9	195.4	198.1	153.5	200.9	51.4	189.3	186.8	153.2
P01325	Ins1	PE	Insulin-1 OS=Mus musculus GN=Ins1 PE=1 SV=1	6.48148	1	5	1	108	12.152	5.77				0.963	7.662	0.797	0.884	0.731	0.084	0.084	0.08		202.8	143.3	195.3	1553.9	144.1	161.7	179.2	137.5	148.2	1710.9
Q3THS6	Mat2a	PE	S-adenosylmethionine synthase isoform type-2 OS=Mus musculus GN=Mat2a PE=1 SV=2	8.35443	3	4	3	395	43.661	6.48				1.143	0.886	1.024	0.74	1.812	1.048	0.732	0.782		170.9	194.4	195.2	151.5	135.7	174.9	126.4	145.1	309.5	185.5
Q9CR67	Tmem33	PE	Transmembrane protein 33 OS=Mus musculus GN=Tmem33 PE=1 SV=1	14.17	4	4	4	247	28.013	9.66				0.805	1.381	1.051	0.803	0.831	0.925	2.19	0.752		241.7	225.6	194.6	333.7	534.5	254	194.2	183.5	200.9	244
Q61176	Arg1	PE	Arginase-1 OS=Mus musculus GN=Arg1 PE=1 SV=1	8.97833	3	5	3	323	34.786	7.01				0.569	0.5	1.019	0.566	0.462	0.812	0.886	0.694		341.5	226.3	194.3	170.8	247.1	347.9	193.2	193.5	157.9	278.8
Q04750	Top1	PE	DNA topoisomerase 1 OS=Mus musculus GN=Top1 PE=1 SV=2	8.08344	7	7	7	767	90.819	9.33				1.145	1.129	0.99	1.01	1.55	0.951	1.149	0.926		169.2	171	193.8	191.1	206.6	167.6	170.9	166.5	262.3	179.8
Q8K1M6	Dnm1l	PE	Dynamin-1-like protein OS=Mus musculus GN=Dnm1l PE=1 SV=2	1.88679	2	2	2	742	82.606	7.05				1.064	1.011	0.983	0.865	1.523	0.847	0.686	0.626		182.1	179.6	193.7	184.1	145.4	179.1	157.5	132.7	277.4	211.9
P61982	Ywhag	PE	14-3-3 protein gamma OS=Mus musculus GN=Ywhag PE=1 SV=2	26.7206	7	14	2	247	28.285	4.89				1.33	1.057	1.41	1.012	2.13	1.13	0.943	0.465		145.6	211.5	193.6	153.9	176.5	205.4	147.3	87	310.3	187.2
Q9CW46	Raver1	PE	Ribonucleoprotein PTB-binding 1 OS=Mus musculus GN=Raver1 PE=1 SV=2	7.62032	6	7	6	748	79.333	8.72				1.345	1.172	1.111	0.846	1.694	0.94	4.661	0.709		143.9	188.1	193.4	168.7	933	159.8	121.8	141.9	243.7	200.2
Q8C6B9	Rps19bp1	PE	Active regulator of SIRT1 OS=Mus musculus GN=Rps19bp1 PE=1 SV=1	35.6643	5	6	5	143	15.968	10.83				0.759	0.887	1.019	1.176	0.692	0.787	2.537	0.915		254.7	164.3	193.2	226	529.2	259.7	299.5	191	176.2	208.7
O89110	Casp8	PE	Caspase-8 OS=Mus musculus GN=Casp8 PE=1 SV=1	11.25	4	4	4	480	55.321	5.25				1.093	1.197	1.173	1.07	1.607	0.933	0.777	0.826		176.7	193	193.1	211.4	160.6	207.3	189.1	170.8	284	206.8
Q9D0K2	Oxct1	PE	Succinyl-CoA:3-ketoacid coenzyme A transferase 1, mitochondrial OS=Mus musculus GN=Oxct1 PE=1 SV=1	6.92308	4	4	4	520	55.953	8.53				0.902	0.913	1.034	0.903	1.263	1.055	0.645	0.787		213.4	215.8	192.5	194.8	132	220.7	192.8	160.9	269.6	204.6
O08585	Clta	PE	Clathrin light chain A OS=Mus musculus GN=Clta PE=1 SV=2	10.2128	3	4	3	235	25.588	4.58				0.719	0.943	0.794	0.353	0.535	0.857	0.557	0.569		267.3	197.1	192.3	252.1	128.1	212.4	94.5	130.7	143.1	229.9
D3Z5F7	Gm20521	PE	Uncharacterized protein OS=Mus musculus GN=Gm20521 PE=4 SV=1	5.40541	2	2	2	333	37.221	8.4				1.119	1.221	1.334	1.278	1.565	1.039	1.462	0.991		171.7	176.8	192.1	209.7	248.8	229	219.4	168.7	268.7	170.2
Q6P5D8	Smchd1	PE	Structural maintenance of chromosomes flexible hinge domain-containing protein 1 OS=Mus musculus GN=Smchd1 PE=1 SV=2	2.39163	5	6	5	2007	225.506	7.24				1.007	1.149	0.765	1.139	1.32	0.749	0.7	0.905		190.4	145.5	191.7	218.8	136	145.7	216.9	175.8	251.3	194.3
P47915	Rpl29	PE	60S ribosomal protein L29 OS=Mus musculus GN=Rpl29 PE=2 SV=2	16.875	4	6	4	160	17.576	11.84				1.236	1.932	1.704	0.832	1.777	1.004	2.446	0.953		154.8	196.6	191.4	299.1	479.2	263.8	128.8	186.6	275.2	195.9
P49718	Mcm5	PE	DNA replication licensing factor MCM5 OS=Mus musculus GN=Mcm5 PE=1 SV=1	8.04911	6	6	6	733	82.29	8.43				1.037	1.471	1.318	1.028	1.511	0.886	2.129	0.964		184.5	245.7	191.3	271.3	590.2	243.1	189.6	267.1	278.8	277.2
Q91V92	Acly	PE	ATP-citrate synthase OS=Mus musculus GN=Acly PE=1 SV=1	2.29148	3	3	3	1091	119.651	7.44				1.122	1.221	1.165	1.437	1.853	0.937	0.652	0.875		170.3	216.1	191.1	207.9	150.3	198.4	244.6	201.8	315.4	230.6
B1AZI6	Thoc2	PE	THO complex subunit 2 OS=Mus musculus GN=Thoc2 PE=1 SV=1	2.133	4	4	4	1594	182.658	8.44				0.933	1.204	0.936	1.045	1.329	0.975	0.859	1.323		204.2	187.5	190.5	245.8	165.1	191.1	213.4	254.4	271.3	192.3
P15327	Bpgm	PE	Bisphosphoglycerate mutase OS=Mus musculus GN=Bpgm PE=1 SV=2	2.7027	1	1	1	259	29.96	7.06				1.518	0.826	1.175	0.955	1.868	0.811	0.565	0.511		125.2	191.5	190	103.4	133.3	147.1	119.6	120.5	233.9	236
P70698	Ctps1	PE	CTP synthase 1 OS=Mus musculus GN=Ctps1 PE=1 SV=2	7.61421	4	4	3	591	66.64	6.58				1.141	1.024	0.843	0.947	1.413	0.97	0.527	0.658		166.3	199.6	189.7	170.3	108.4	140.1	157.5	135.3	234.9	205.7
Q6PIU9	1	SV	Uncharacterized protein FLJ45252 homolog OS=Mus musculus PE=1 SV=2	13.5593	4	5	4	354	37.681	5.07				0.933	0.895	0.762	1.101	0.871	0.869	0.658	0.954		203.3	161.7	189.6	182	122.4	154.9	223.8	177.3	177.1	185.9
Q3UU67	Trat1	PE	T-cell receptor-associated transmembrane adapter 1 OS=Mus musculus GN=Trat1 PE=1 SV=2	4.81283	1	1	1	187	21.317	5.16				6.01	1.006	4.587	0.931	6.94	1.044	0.852	0.882		31.5	47.4	189.4	31.7	38.7	144.6	29.4	40.1	218.7	45.4
Q9QXE7	Tbl1x	PE	F-box-like/WD repeat-containing protein TBL1X OS=Mus musculus GN=Tbl1x PE=1 SV=2	3.03605	2	2	2	527	56.767	5.72				1.142	1.218	0.921	1.256	1.398	0.669	0.5	0.718		165.4	167.8	189	201.5	125.5	152.4	207.8	180.1	231.3	250.9
O35368	Ifi203	PE	Interferon-activable protein 203 OS=Mus musculus GN=Ifi203 PE=1 SV=1	11.5196	5	7	4	408	46.27	9.35				1.058	1.105	1.107	1.541	1.34	0.718	3.447	0.994		178.6	158.8	188.9	197.3	762.6	197.6	275.3	219.9	239.3	221.2
Q6ZQ08	Cnot1	PE	CCR4-NOT transcription complex subunit 1 OS=Mus musculus GN=Cnot1 PE=1 SV=2	1.89474	4	4	4	2375	266.637	7.11				0.77	1.021	1.159	0.782	1.005	0.914	0.814	0.859		244.9	207.2	188.7	250	184.7	283.8	191.5	194.8	246.2	226.9
Q9EQ06	Hsd17b11	PE	Estradiol 17-beta-dehydrogenase 11 OS=Mus musculus GN=Hsd17b11 PE=1 SV=1	8.38926	3	4	3	298	32.86	8.66				0.967	1.038	1.283	0.971	1.452	1.001	2.006	0.752		194.9	205.6	188.5	202.3	412	250	189.3	154.4	283	205.4
Q9D0M3	Cyc1	PE	Cytochrome c1, heme protein, mitochondrial OS=Mus musculus GN=Cyc1 PE=1 SV=1	12.9231	4	6	4	325	35.305	9.16				0.864	0.825	0.998	0.879	1.243	0.739	3.814	0.826		218.1	174.5	188.4	179.9	901.1	217.7	191.7	195	271.2	236.3
P04370	Mbp	PE	Myelin basic protein OS=Mus musculus GN=Mbp PE=1 SV=2	23.6	6	8	6	250	27.151	9.58				0.804	0.827	1.036	1.671	1.14	0.849	3.499	1.2		233.3	181.8	187.5	192.8	749.2	241.7	389.9	256.9	266	214.1
Q9D5V5	Cul5	PE	Cullin-5 OS=Mus musculus GN=Cul5 PE=1 SV=3	2.94872	3	3	3	780	90.916	7.81				0.973	1.188	1.059	1.142	1.338	1.469	0.775	0.918		192.6	318.6	187.4	228.8	168	203.9	220	199.1	257.7	216.9
A0A075B5J4	Trbc2	PE	T cell receptor beta, constant 2 (Fragment) OS=Mus musculus GN=Trbc2 PE=4 SV=1	4.62428	1	1	1	173	19.266	8.68				2.645	1.337	1.522	1.588	1.485	1.069	0.807	0.753		70.8	118.7	187.2	94.6	89.5	107.7	112.4	83.5	105.1	111
P61965	Wdr5	PE	WD repeat-containing protein 5 OS=Mus musculus GN=Wdr5 PE=1 SV=1	7.18563	3	3	3	334	36.565	8.27				0.931	1.101	0.848	0.981	1.108	0.727	0.89	0.787		201	166.9	187.1	221.3	204.2	170.4	197.2	180.7	222.6	229.5
P67984	Rpl22	PE	60S ribosomal protein L22 OS=Mus musculus GN=Rpl22 PE=1 SV=2	18.75	2	3	2	128	14.75	9.19				1.244	1.193	1.15	1.556	1.759	0.904	1.749	1.071		150.1	146.4	186.7	178.9	283.3	172.5	233.5	173.5	264	162
P54276	Msh6	PE	DNA mismatch repair protein Msh6 OS=Mus musculus GN=Msh6 PE=1 SV=3	2.50368	3	3	3	1358	150.989	6.73				4.846	1.247	4.759	0.808	5.224	3.102	2.526	4.232		38.5	177.6	186.5	48	144.6	183.2	31.1	242.3	201.1	57.3
P51855	Gss	PE	Glutathione synthetase OS=Mus musculus GN=Gss PE=1 SV=1	3.5865	2	2	2	474	52.214	5.8				1.2	0.948	1.666	0.864	1.128	0.659	0.623	0.606		155.1	153.4	186.2	147	145.1	258.4	134	141.1	175	232.8
P61089	Ube2n	PE	Ubiquitin-conjugating enzyme E2 N OS=Mus musculus GN=Ube2n PE=1 SV=1	20.3947	4	4	4	152	17.127	6.57				1.41	0.941	1.354	0.824	2.53	1.007	0.46	0.478		131.5	208.9	185.4	123.7	95.4	178	108.4	99.3	332.7	207.5
O08547	Sec22b	PE	Vesicle-trafficking protein SEC22b OS=Mus musculus GN=Sec22b PE=1 SV=3	12.5581	3	3	3	215	24.725	8.51				1.075	1.114	1.301	1.021	1.883	0.851	0.725	0.626		172.4	202.7	185.4	192	172.7	224.3	176.1	149	324.6	238.2
O35955	Psmb10	PE	Proteasome subunit beta type-10 OS=Mus musculus GN=Psmb10 PE=1 SV=1	19.0476	4	4	4	273	29.045	6.87				1.159	1.134	1.256	0.977	1.642	0.995	0.714	0.727		158.7	198.6	184	179.9	142.6	199.3	155.1	145.2	260.6	199.7
Q9DBG5	Plin3	PE	Perilipin-3 OS=Mus musculus GN=Plin3 PE=1 SV=1	4.80549	2	2	2	437	47.233	5.62				1.013	1.077	1.13	0.932	1.012	0.979	0.76	0.706		181.6	184.9	184	195.6	143.6	205.2	169.2	133.4	183.9	189
Q9DB29	Iah1	PE	Isoamyl acetate-hydrolyzing esterase 1 homolog OS=Mus musculus GN=Iah1 PE=1 SV=1	3.21285	1	1	1	249	27.956	5.52				0.573	0.793	0.418	0.389	0.319	1.786	0.75	0.913		320.4	311.4	183.4	254.1	130.7	134	124.7	159.2	102.3	174.3
Q6PFD9	Nup98	PE	Nuclear pore complex protein Nup98-Nup96 OS=Mus musculus GN=Nup98 PE=1 SV=2	2.14758	4	4	4	1816	197.118	6.18				0.814	0.996	0.758	1.368	1.099	0.589	1.227	0.806		225.1	163.9	183.3	224.3	341.4	170.6	307.9	224.1	247.5	278.1
Q99MK8	Grk2	PE	Beta-adrenergic receptor kinase 1 OS=Mus musculus GN=Grk2 PE=1 SV=2	3.91872	3	3	3	689	79.588	7.28				1.59	1.592	1.729	1.249	1.905	1.585	1.627	1.597		115.2	197.4	183.3	183.5	202.6	199.2	143.9	198.9	219.6	124.6
Q9CQW1	Ykt6	PE	Synaptobrevin homolog YKT6 OS=Mus musculus GN=Ykt6 PE=1 SV=1	23.7374	4	4	4	198	22.3	6.35				0.682	0.772	0.695	0.928	0.673	0.78	0.528	0.83		268.5	174.5	183.1	207.4	118.2	186.7	249.2	185.6	180.7	223.7
Q80US4	Actr5	PE	Actin-related protein 5 OS=Mus musculus GN=Actr5 PE=1 SV=3	2.64463	2	2	2	605	67.802	5.19				0.837	1.12	0.696	1.206	0.944	0.985	0.666	1.054		218.7	194.5	183	244.8	131.5	152.2	263.6	208.3	206.3	197.5
P07309	Ttr	PE	Transthyretin OS=Mus musculus GN=Ttr PE=1 SV=1	4.08163	1	1	2	147	15.766	6.16				0.703	1.045	0.685	0.732	0.527	0.522	0.322	0.417		259.2	206.4	182.3	270.8	127.3	177.4	189.9	165.1	136.6	395.8
P99029	Prdx5	PE	Peroxiredoxin-5, mitochondrial OS=Mus musculus GN=Prdx5 PE=1 SV=2	13.3333	2	5	2	210	21.884	8.85				0.979	1.226	1.149	1.204	1.321	0.931	0.782	0.984		186	177.2	182	227.9	148.8	213.7	224	187.2	245.6	190.3
Q8VDP4	Ccar2	PE	Cell cycle and apoptosis regulator protein 2 OS=Mus musculus GN=Ccar2 PE=1 SV=2	3.47072	3	3	3	922	102.938	5.25				1.107	1.13	1.247	1.255	1.742	0.834	0.889	0.913		164.2	161.1	181.8	185.7	171.8	204.9	206.1	176.3	286.1	193.2
P70195	Psmb7	PE	Proteasome subunit beta type-7 OS=Mus musculus GN=Psmb7 PE=1 SV=1	10.1083	2	2	2	277	29.872	7.99				0.957	0.91	1.001	1.007	1.241	0.874	0.59	0.988		189.8	175.3	181.6	172.8	118.4	190.1	191.1	198.2	235.6	200.6
P09103	P4hb	PE	Protein disulfide-isomerase OS=Mus musculus GN=P4hb PE=1 SV=2	7.26916	3	3	3	509	57.023	4.88				1.24	0.98	1.661	0.657	2.37	0.888	0.655	0.676		146.1	194.3	181.2	143.2	143.4	242.6	96	148.1	346.1	218.9
P15508	Sptb	PE	Spectrin beta chain, erythrocytic OS=Mus musculus GN=Sptb PE=1 SV=4	1.97368	4	4	3	2128	245.098	5.33				1.55	0.666	0.521	1.698	0.453	0.375	0.486	1.89		116.8	56.2	181	77.8	73	60.8	198.4	283.9	52.9	150.2
Q02614	Sap30bp	PE	SAP30-binding protein OS=Mus musculus GN=Sap30bp PE=1 SV=2	7.46753	2	2	2	308	33.812	4.87				0.836	1.018	0.787	1.167	0.823	0.798	0.664	1.031		215.8	154.7	180.5	219.7	128.7	169.8	251.9	199.7	177.7	193.8
G3X987	Gimap9	PE	GTPase, IMAP family member 9 OS=Mus musculus GN=Gimap9 PE=1 SV=1	8.59107	3	4	3	291	33.277	6.57				1.061	0.997	1.054	0.649	1.767	0.983	0.614	0.523		168.4	203.9	178.7	167.9	127.3	177.5	109.2	108.4	297.5	207.4
Q8R1Q8	Dync1li1	PE	Cytoplasmic dynein 1 light intermediate chain 1 OS=Mus musculus GN=Dync1li1 PE=1 SV=1	4.2065	2	2	2	523	56.579	6.42				1.195	0.933	1.131	1.016	1.865	0.875	0.552	0.604		149.2	176.4	178.3	139.2	111.2	168.8	151.7	121.7	278.3	201.5
Q8BW10	Nob1	PE	RNA-binding protein NOB1 OS=Mus musculus GN=Nob1 PE=1 SV=1	10.1737	5	7	5	403	45.435	7.31				0.856	0.998	1.13	1.326	1.05	0.916	5.394	0.911		207.6	192.2	177.8	207.2	1131.9	234.6	275.3	191.1	218.1	209.9
Q9Z0I7	Slfn1	PE	Schlafen 1 OS=Mus musculus GN=Slfn1 PE=1 SV=1	7.71513	3	3	3	337	37.972	7.33				1.566	0.883	1.339	0.85	2.766	0.974	0.774	0.688		113.5	154.4	177.8	100.3	122.7	152.1	96.5	109.2	314.1	158.6
E9QAP7	Taf4	PE	TATA-box-binding protein-associated factor 4 OS=Mus musculus GN=Taf4 PE=1 SV=1	4.7025	4	4	4	1042	105.242	9.86				0.676	0.994	0.73	1.173	0.809	0.802	0.717	1.057		262.7	174.4	177.6	261.2	155.9	191.7	308.1	230	212.4	217.6
O35218	Cpsf2	PE	Cleavage and polyadenylation specificity factor subunit 2 OS=Mus musculus GN=Cpsf2 PE=1 SV=1	4.73146	4	5	4	782	88.327	5.11				0.782	1.035	0.815	1.342	1.003	0.758	0.637	0.824		226.9	179.5	177.4	234.9	150.8	184.9	304.4	195.1	227.6	236.8
Q9Z130	Hnrnpdl	PE	Heterogeneous nuclear ribonucleoprotein D-like OS=Mus musculus GN=Hnrnpdl PE=1 SV=1	10.9635	4	10	2	301	33.538	7.31				1.262	0.906	1.366	1.758	1.493	0.66	1.08	0.509		140.6	131.5	177.3	127.4	215.3	192	247	101.4	209.9	199.3
Q9DCT2	Ndufs3	PE	NADH dehydrogenase [ubiquinone] iron-sulfur protein 3, mitochondrial OS=Mus musculus GN=Ndufs3 PE=1 SV=2	22.0532	5	6	5	263	30.131	7.17				0.831	1.167	1.091	0.965	0.976	1.037	0.808	0.949		212.8	197.1	177	248.3	153.5	232.3	205.3	180.2	207.7	190
P10639	Txn	PE	Thioredoxin OS=Mus musculus GN=Txn PE=1 SV=3	17.1429	2	3	2	105	11.668	4.92				1.11	0.823	1.646	1.602	1.112	1.252	0.97	0.966		159.4	214.6	177	131.2	166.2	262.5	255.4	165.6	177.2	171.4
Q62159	Rhoc	PE	Rho-related GTP-binding protein RhoC OS=Mus musculus GN=Rhoc PE=1 SV=2	18.6528	3	4	3	193	21.992	6.58				0.865	0.84	1.094	0.651	1.261	1.278	0.941	0.747		203.8	229.7	176.3	171.1	169.1	223	132.7	134.3	257	179.8
P55258	Rab8a	PE	Ras-related protein Rab-8A OS=Mus musculus GN=Rab8a PE=1 SV=2	21.256	5	7	3	207	23.653	9.07				1.12	0.936	1.333	0.934	2.375	0.948	1.37	0.727		157.3	181.6	176.1	147.3	262.5	209.7	146.9	139.3	373.6	191.6
P70296	Pebp1	PE	Phosphatidylethanolamine-binding protein 1 OS=Mus musculus GN=Pebp1 PE=1 SV=3	4.27807	1	2	1	187	20.817	5.4				1.363	1.28	2.433	1.204	2.371	0.815	0.861	0.63		128.9	182.5	175.7	165	192.8	313.6	155.1	141.1	305.6	223.9
P62900	Rpl31	PE	60S ribosomal protein L31 OS=Mus musculus GN=Rpl31 PE=1 SV=1	38.4	5	7	5	125	14.454	10.54				1.174	1.296	1.973	1.499	1.835	1.268	9.04	1.386		148.9	164	174.8	193	1169.2	293.8	223.2	179.2	273.2	129.3
Q8C0C7	Farsa	PE	Phenylalanine--tRNA ligase alpha subunit OS=Mus musculus GN=Farsa PE=1 SV=1	11.0236	6	7	6	508	57.563	8.28				1.123	1.233	1.336	1.221	1.717	1.07	4.359	1.188		155.5	182.1	174.5	191.7	742.3	207.7	189.8	202.3	266.9	170.3
Q9CX56	Psmd8	PE	26S proteasome non-ATPase regulatory subunit 8 OS=Mus musculus GN=Psmd8 PE=1 SV=2	7.64873	3	4	3	353	39.905	9.58				1.058	1.15	1.068	1.142	1.23	1.164	1.008	1.15		165	178.4	174.5	189.7	154.6	176.2	188.3	176.4	202.9	153.3
Q3TPX4	Exoc5	PE	Exocyst complex component 5 OS=Mus musculus GN=Exoc5 PE=1 SV=2	4.66102	3	3	3	708	81.686	6.71				0.7	1.014	1.11	0.545	0.452	0.941	0.935	0.733		248.9	204.6	174.3	252.4	203.2	276.3	135.7	159.4	112.6	217.4
Q9DC61	Pmpca	PE	Mitochondrial-processing peptidase subunit alpha OS=Mus musculus GN=Pmpca PE=1 SV=1	6.87023	4	6	4	524	58.242	6.83				0.791	1.011	0.874	0.914	1.035	0.836	0.684	0.846		218.8	176.7	173.1	221.3	144.6	191.2	199.9	178.7	226.5	211.3
Q99LP6	Grpel1	PE	GrpE protein homolog 1, mitochondrial OS=Mus musculus GN=Grpel1 PE=1 SV=1	10.1382	2	2	2	217	24.292	8.38				0.936	1.158	0.72	0.914	1.023	0.924	0.417	0.677		184.7	197.5	173	214	89.1	133.1	168.8	144.7	189	213.7
O35737	Hnrnph1	PE	Heterogeneous nuclear ribonucleoprotein H OS=Mus musculus GN=Hnrnph1 PE=1 SV=3	19.1537	6	9	4	449	49.168	6.3				0.889	0.78	0.899	0.605	0.837	0.877	1.031	0.734		194.5	153.9	172.9	151.8	180.8	175	117.8	128.7	162.9	175.4
Q9D8M4	Rpl7l1	PE	60S ribosomal protein L7-like 1 OS=Mus musculus GN=Rpl7l1 PE=1 SV=1	18.2927	5	5	5	246	28.526	10.64				0.88	0.958	1.143	1.029	1.027	0.808	5.392	1.247		196.5	143.6	172.9	188.3	958.4	224.6	202.3	221.6	201.9	177.7
Q06180	Ptpn2	PE	Tyrosine-protein phosphatase non-receptor type 2 OS=Mus musculus GN=Ptpn2 PE=1 SV=2	3.44828	2	2	2	406	47.33	8.37				1.322	1.5	1.146	0.984	1.302	1.437	1.401	0.936		130.6	203.4	172.6	195.8	198.3	149.6	128.5	132.6	170	141.6
P51859	Hdgf	PE	Hepatoma-derived growth factor OS=Mus musculus GN=Hdgf PE=1 SV=2	12.2363	3	4	3	237	26.253	4.83				1.279	1.04	1.486	1.009	2.38	1.099	0.712	0.73		134.8	181.1	172.3	140.2	117.3	200.3	136	120.3	320.8	164.7
Q8VDM6	Hnrnpul1	PE	Heterogeneous nuclear ribonucleoprotein U-like protein 1 OS=Mus musculus GN=Hnrnpul1 PE=1 SV=1	7.91618	6	6	6	859	95.942	6.58				1.53	1.252	1.359	1.294	1.974	0.753	0.857	1.021		112	121	171.3	140.2	137.8	152.2	144.9	164.1	221	160.7
Q5SXC4	Vezf1	PE	Vascular endothelial zinc finger 1 OS=Mus musculus GN=Vezf1 PE=1 SV=1	6.56371	3	3	4	518	56.521	9.57				0.896	0.949	0.696	1.076	0.676	0.893	1.252	0.907		191.3	151.7	171.3	181.6	212.7	133.1	205.7	154.1	129.2	169.9
Q61990	Pcbp2	PE	Poly(rC)-binding protein 2 OS=Mus musculus GN=Pcbp2 PE=1 SV=1	22.0994	6	8	3	362	38.197	6.79				1.143	1.144	1.468	1.118	1.63	0.947	1.014	0.794		148.9	190	170.3	170.4	203.6	218.7	166.4	159.4	242.8	200.7
Q9ESZ8	Gtf2i	PE	General transcription factor II-I OS=Mus musculus GN=Gtf2i PE=1 SV=3	1.2024	2	2	2	998	112.195	6.55				1.232	1.19	1.248	1.092	1.861	0.861	0.92	0.753		138.3	145.6	170.3	164.6	155.5	172.5	151	127.2	257.3	169
Q9DB42	Znf593	PE	Zinc finger protein 593 OS=Mus musculus GN=Znf593 PE=1 SV=2	29.1045	3	6	3	134	15.138	9.55				0.925	1.258	1.291	2.008	1.152	0.847	2.323	1.112		183.9	193.6	170.2	231.3	531.2	237.4	369.3	254.3	211.9	228.6
P10630	Eif4a2	PE	Eukaryotic initiation factor 4A-II OS=Mus musculus GN=Eif4a2 PE=1 SV=2	21.1302	7	12	2	407	46.373	5.48				0.833	0.712	0.923	0.743	1.084	1.111	0.84	0.946		204.1	187.1	169.9	145.3	141.5	188.4	151.6	159.4	221.3	168.4
P63323	Rps12	PE	40S ribosomal protein S12 OS=Mus musculus GN=Rps12 PE=1 SV=2	20.4545	3	4	3	132	14.516	7.24				1.19	1.071	1.66	1.147	1.823	1.152	2.266	0.844		142.7	171	169.8	152.9	336.3	236.8	163.6	125.3	260.1	148.4
Q9D898	Arpc5l	PE	Actin-related protein 2/3 complex subunit 5-like protein OS=Mus musculus GN=Arpc5l PE=1 SV=1	9.15033	2	2	2	153	16.97	6.8				0.811	0.517	0.591	0.401	0.613	0.737	0.557	0.52		208.7	132.5	169.2	107.8	100.2	123.3	83.6	93.5	128	179.8
Q8BZ03	Prkd2	PE	Serine/threonine-protein kinase D2 OS=Mus musculus GN=Prkd2 PE=1 SV=1	7.08571	5	5	5	875	96.481	6.89				1.084	1.086	1.208	0.885	1.501	0.796	0.743	0.866		155.8	147.2	168.9	169.2	137.4	188.1	137.8	160.2	233.7	185
Q65Z40	Wapl	PE	Wings apart-like protein homolog OS=Mus musculus GN=Wapl PE=1 SV=2	2.58333	3	3	3	1200	133.986	5.41				0.964	1.267	1.129	0.921	1.256	0.811	0.852	0.962		175	154.7	168.8	221.8	162.7	197.6	161.1	183.5	219.9	190.8
P70122	Sbds	PE	Ribosome maturation protein SBDS OS=Mus musculus GN=Sbds PE=1 SV=4	3.2	1	1	1	250	28.762	8.76				1.533	1.271	1.555	1.203	2.605	1.086	0.988	0.631		109.9	183.6	168.5	139.7	167	170.9	132.2	106.7	286.3	169
P70460	Vasp	PE	Vasodilator-stimulated phosphoprotein OS=Mus musculus GN=Vasp PE=1 SV=4	15.4667	5	5	5	375	39.642	8.53				0.93	0.941	0.959	1.035	1.298	0.917	0.532	0.807		180.8	174	168.1	170.1	101	173.4	187.1	153.1	234.6	189.7
Q80TY0	Fnbp1	PE	Formin-binding protein 1 OS=Mus musculus GN=Fnbp1 PE=1 SV=2	4.54545	3	3	3	616	71.299	5.67				1.045	0.78	1.239	0.918	1.34	0.818	0.844	0.945		159.9	146.2	167.1	124.7	150.9	198.1	146.7	168.8	214.1	178.7
P06240	Lck	PE	Proto-oncogene tyrosine-protein kinase LCK OS=Mus musculus GN=Lck PE=1 SV=4	9.43026	4	6	3	509	57.906	5.25				0.885	1.138	0.894	0.911	0.925	0.461	0.56	0.372		188.6	174.3	166.9	214.6	211.6	168.6	171.9	140.6	174.5	378.1
Q61578	Fdxr	PE	NADPH:adrenodoxin oxidoreductase, mitochondrial OS=Mus musculus GN=Fdxr PE=1 SV=1	10.5263	5	6	5	494	54.168	8.66				0.926	1.444	1.13	1.26	1.08	0.617	0.808	0.852		180	136.4	166.7	259.8	178.6	203.3	226.7	188.3	194.4	221.1
Q80X41	Vrk1	PE	Serine/threonine-protein kinase VRK1 OS=Mus musculus GN=Vrk1 PE=1 SV=2	4.31818	2	2	2	440	49.709	8.94				1.114	1.07	1.156	1.169	1.509	1.035	1.299	0.612		149.3	181.8	166.3	159.7	228.1	172.6	174.4	107.5	225.2	175.6
Q91WM3	Rrp9	PE	U3 small nucleolar RNA-interacting protein 2 OS=Mus musculus GN=Rrp9 PE=1 SV=1	3.15789	2	2	2	475	52.075	7.88				1.067	1.239	1.168	0.887	1.086	0.851	1.077	0.741		155.9	167.5	166.3	193.2	211.9	182.2	138.4	145.7	169.4	196.7
Q8BTI8	Srrm2	PE	Serine/arginine repetitive matrix protein 2 OS=Mus musculus GN=Srrm2 PE=1 SV=3	3.58861	7	7	7	2703	294.666	12.03				0.908	1.09	0.947	0.859	1.022	0.844	0.79	1.1		183	140.5	166.2	199.5	131.5	173.3	157.2	183.2	187.1	166.5
E9PWW0	Vmn2r103	PE	Vomeronasal 2, receptor 103 OS=Mus musculus GN=Vmn2r103 PE=3 SV=1	0.700935	1	1	1	856	98.756	7.55				1.057	1.134	1.092	0.88	1.808	0.875	0.652	0.592		156.9	176.6	165.8	177.9	131.5	171.4	138.1	119.5	283.7	201.7
P61957	Sumo2	PE	Small ubiquitin-related modifier 2 OS=Mus musculus GN=Sumo2 PE=1 SV=1	29.4737	3	3	3	95	10.864	5.5				1.007	1.313	1.208	1.473	1.183	0.782	0.792	0.901		162.9	145.7	164.1	213.9	147.6	196.8	239.9	167.9	192.7	186.3
Q8BMS9	Rassf2	PE	Ras association domain-containing protein 2 OS=Mus musculus GN=Rassf2 PE=1 SV=1	12.8834	4	4	4	326	37.949	7.94				1.189	1.16	1.203	0.755	1.593	1.122	0.792	0.776		138	160.7	164.1	160	113.5	166	104.2	111.2	219.8	143.2
P19096	Fasn	PE	Fatty acid synthase OS=Mus musculus GN=Fasn PE=1 SV=2	1.79712	4	4	4	2504	272.257	6.58				1.103	1.122	0.953	0.815	1.819	0.744	0.58	0.753		148.5	136	163.8	166.7	105.9	141.6	121	137.5	270.2	182.6
Q9Z1D1	Eif3g	PE	Eukaryotic translation initiation factor 3 subunit G OS=Mus musculus GN=Eif3g PE=1 SV=2	13.125	4	6	4	320	35.616	5.9				0.867	0.924	1.114	0.925	1.259	0.985	0.792	0.661		188.8	197.1	163.7	174.5	158.5	210.3	174.6	132.2	237.6	200.1
Q00422	Gabpa	PE	GA-binding protein alpha chain OS=Mus musculus GN=Gabpa PE=1 SV=2	3.52423	2	2	2	454	51.312	5				1.457	1.368	1.362	1.08	1.977	0.941	0.744	0.805		112.1	152.8	163.4	153.4	120.8	152.8	121.1	130.6	221.7	162.3
O55142	Rpl35a	PE	60S ribosomal protein L35a OS=Mus musculus GN=Rpl35a PE=1 SV=2	6.36364	1	2	1	110	12.546	10.89				1.567	1.178	1.428	1.139	1.395	0.864	0.772	0.759		104.1	131.9	163.1	122.6	117.7	148.7	118.6	115.8	145.2	152.6
Q60787	Lcp2	PE	Lymphocyte cytosolic protein 2 OS=Mus musculus GN=Lcp2 PE=1 SV=2	4.69043	2	2	2	533	60.201	6.21				1.283	1.303	1.302	0.84	1.943	0.886	0.694	0.685		126.8	162.7	162.7	165.2	127.5	165.1	106.5	125.8	246.3	183.7
Q9Z103	Adnp	PE	Activity-dependent neuroprotector homeobox protein OS=Mus musculus GN=Adnp PE=1 SV=2	3.06859	3	4	3	1108	124.229	6.86				1	1.194	0.84	1.176	1.179	0.947	0.834	1.069		162.7	150.7	162.6	194.1	132.7	136.7	191.3	170.1	191.7	159.1
P18242	Ctsd	PE	Cathepsin D OS=Mus musculus GN=Ctsd PE=1 SV=1	3.41463	2	2	2	410	44.925	7.15				0.899	0.764	1.656	1.023	1.419	0.882	0.784	0.616		179.8	172.6	161.7	137.4	153.5	297.8	184	120.7	255.2	195.8
Q8BHG9	Cggbp1	PE	CGG triplet repeat-binding protein 1 OS=Mus musculus GN=Cggbp1 PE=1 SV=1	19.7605	3	4	3	167	18.75	8.95				1.14	0.887	0.982	0.869	1.205	1.298	1.983	0.849		141.3	206	161.1	125.4	314.8	138.7	122.8	134.7	170.2	158.7
Q1HFZ0	Nsun2	PE	tRNA (cytosine(34)-C(5))-methyltransferase OS=Mus musculus GN=Nsun2 PE=1 SV=2	2.77411	2	2	2	757	85.397	6.58				0.973	0.75	1.002	0.762	1.586	0.903	0.982	0.678		165.4	169.9	160.9	123.9	184.8	165.6	125.9	127.6	262.3	188.1
Q6PGN1	Erfe	PE	Erythroferrone OS=Mus musculus GN=Erfe PE=1 SV=1	1.76471	1	2	1	340	36.242	9.36				4.427	3.827	0.886	2.699	1.899	11.569	0.654	1.071		36.3	695	160.8	139.1	39.3	32.2	98.1	64.3	69	60.1
P61327	Magoh	PE	Protein mago nashi homolog OS=Mus musculus GN=Magoh PE=2 SV=1	13.0137	2	2	2	146	17.153	6.11				1.567	1.139	1.827	1.199	1.951	0.729	0.847	0.736		102.2	105.5	160.2	116.5	122.7	186.8	122.6	106.6	199.5	144.8
Q64737	Gart	PE	Trifunctional purine biosynthetic protein adenosine-3 OS=Mus musculus GN=Gart PE=1 SV=3	2.47525	3	3	3	1010	107.436	6.68				1.037	1.155	1.037	0.818	1.87	0.838	0.522	0.585		154.2	161.7	160	178.2	100.7	159.9	126.1	112.9	288.5	193
Q6ZPV2	Ino80	PE	DNA helicase INO80 OS=Mus musculus GN=Ino80 PE=1 SV=2	2.56575	4	4	4	1559	176.41	9.36				0.813	1.17	0.957	1.357	1.094	0.714	0.727	1.188		196.3	134.3	159.6	229.7	136.7	187.9	266.4	223.4	214.7	188
P57776	Eef1d	PE	Elongation factor 1-delta OS=Mus musculus GN=Eef1d PE=1 SV=3	20.6406	4	7	4	281	31.274	5.02				1.327	1.299	1.272	1.288	1.62	0.703	0.418	0.458		120.2	165.6	159.5	156.1	98.3	152.9	154.8	107.8	194.7	235.4
Q68FG3	Spty2d1	PE	Protein SPT2 homolog OS=Mus musculus GN=Spty2d1 PE=2 SV=1	9.82405	7	8	7	682	74.773	9.76				1.102	0.628	1.062	0.937	0.954	0.866	7.195	0.968		144.5	140.7	159.3	90.7	1168.8	153.6	135.5	157.3	138	162.4
Q9CZU3	Skiv2l2	PE	Superkiller viralicidic activity 2-like 2 OS=Mus musculus GN=Skiv2l2 PE=1 SV=1	2.5	3	4	3	1040	117.561	6.4				1.359	1.376	1.482	1.291	1.913	0.971	1.001	0.997		117.3	146.5	159.3	161.4	151	173.8	151.4	150.5	224.3	150.9
O89094	Casp14	PE	Caspase-14 OS=Mus musculus GN=Casp14 PE=1 SV=1	3.11284	1	2	1	257	29.44	4.86				0.657	0.736	1.432	1.081	0.424	0.786	0.805	0.818		242.4	156.4	159.2	178.4	160.2	346.9	261.9	162.7	102.8	199
Q8BKJ9	Sirt7	PE	NAD-dependent protein deacetylase sirtuin-7 OS=Mus musculus GN=Sirt7 PE=1 SV=2	13.4328	5	5	5	402	45.118	9.58				1.115	1.294	1.354	1.72	1.139	1.02	5.806	1.193		142.5	151.3	158.9	184.3	861	193	245.2	176.9	162.3	148.3
Q921W0	Chmp1a	PE	Charged multivesicular body protein 1a OS=Mus musculus GN=Chmp1a PE=1 SV=1	11.7347	3	3	3	196	21.594	8.06				0.963	1.16	1.196	1.038	1.311	1.14	0.895	0.811		164.7	195	158.6	191.1	153.1	197	171	138.8	216	171.1
Q8C878	Uba3	PE	NEDD8-activating enzyme E1 catalytic subunit OS=Mus musculus GN=Uba3 PE=1 SV=2	1.51515	1	1	1	462	51.704	5.45				1.164	0.862	1.015	1.196	1.9	0.773	0.518	0.822		136.2	127	158.5	117.3	85.2	138.2	162.9	135.2	258.7	164.4
Q9QY24	Zbp1	PE	Z-DNA-binding protein 1 OS=Mus musculus GN=Zbp1 PE=1 SV=1	8.27251	3	3	3	411	44.304	5.8				0.97	1.285	0.991	1.113	1.057	0.695	0.645	0.834		163.2	150.1	158.3	209.7	139.2	161.7	181.7	180.1	172.5	215.8
Q9R1T2	Sae1	PE	SUMO-activating enzyme subunit 1 OS=Mus musculus GN=Sae1 PE=1 SV=1	2.28571	1	1	1	350	38.596	5.36				1.562	1.283	1.259	0.976	2.223	0.656	0.392	0.811		101.2	116.8	158	129.8	69.8	127.4	98.7	144.3	225	178
Q8JZQ2	Afg3l2	PE	AFG3-like protein 2 OS=Mus musculus GN=Afg3l2 PE=1 SV=1	1.87032	2	2	2	802	89.463	8.6				1.099	1.484	1.101	1.19	1.451	0.872	1.089	1.249		143.6	117.5	157.8	213	146.8	158.1	170.9	168.2	208.3	134.7
O89086	Rbm3	PE	RNA-binding protein 3 OS=Mus musculus GN=Rbm3 PE=1 SV=1	33.9869	5	5	5	153	16.595	7.5				1.096	1.297	1.292	1.158	1.773	0.983	1.526	0.75		143.2	186.3	156.9	185.7	289.3	185	165.9	142.1	253.8	189.5
P59325	Eif5	PE	Eukaryotic translation initiation factor 5 OS=Mus musculus GN=Eif5 PE=1 SV=1	5.82751	3	3	3	429	48.938	5.52				0.967	0.863	0.949	0.881	1.314	1.323	0.875	0.871		162.2	206	156.8	140	136.2	153.8	142.8	135.6	213.1	155.7
Q9CQR6	Ppp6c	PE	Serine/threonine-protein phosphatase 6 catalytic subunit OS=Mus musculus GN=Ppp6c PE=1 SV=1	9.18033	3	3	3	305	35.136	5.69				0.967	0.88	1.001	0.899	1.121	0.632	1.039	0.769		162.1	122.2	156.7	142.6	200.8	162.3	145.8	148.6	181.7	193.2
Q91YH6	Atp6v1b1	PE	ATPase, H+ transporting, lysosomal V1 subunit B1 OS=Mus musculus GN=Atp6v1b1 PE=1 SV=1	2.92398	2	2	2	513	56.755	5.34				0.954	1.269	1.131	1.077	1.027	0.968	0.767	0.688		163.7	195.1	156.2	207.9	154.4	185.2	176.4	138.5	168.1	201.4
Q8C2K1	Def6	PE	Differentially expressed in FDCP 6 OS=Mus musculus GN=Def6 PE=1 SV=1	2.69841	2	2	2	630	73.408	6.27				1.286	2.493	1.245	1.062	2.206	1.087	0.851	0.726		121.2	166.3	156	302.3	130.2	151	128.7	111	267.4	153
P62715	Ppp2cb	PE	Serine/threonine-protein phosphatase 2A catalytic subunit beta isoform OS=Mus musculus GN=Ppp2cb PE=1 SV=1	9.70874	3	3	3	309	35.552	5.43				0.787	0.97	0.785	0.834	1.098	0.852	0.701	0.807		198.1	177.8	155.9	192.1	146.3	155.6	165.2	168.5	217.4	208.8
Q60759	Gcdh	PE	Glutaryl-CoA dehydrogenase, mitochondrial OS=Mus musculus GN=Gcdh PE=1 SV=2	7.99087	4	5	3	438	48.575	8.73				0.77	1.196	0.967	1.15	0.841	0.618	0.966	0.927		201	110.3	154.8	240.4	172.5	194.3	231.1	165.7	169	178.6
Q9WUP7	Uchl5	PE	Ubiquitin carboxyl-terminal hydrolase isozyme L5 OS=Mus musculus GN=Uchl5 PE=1 SV=2	6.38298	2	2	2	329	37.593	5.33				0.939	1.254	0.965	1.227	1.088	0.967	0.704	0.933		164.7	151.8	154.7	206.6	110.5	159	202.1	146.4	179.2	157
Q9D0I9	Rars	PE	Arginine--tRNA ligase, cytoplasmic OS=Mus musculus GN=Rars PE=1 SV=2	7.42424	5	5	5	660	75.625	7.55				1.133	1.687	1.294	0.873	1.594	1.131	1.342	0.813		136.3	203	154.4	230	240.8	176.3	119	145.8	217.3	179.5
Q8VC65	Nrm	PE	Nurim OS=Mus musculus GN=Nrm PE=1 SV=1	5.72519	2	2	2	262	29.416	8.21				0.926	1.111	0.956	0.717	0.877	0.961	0.787	0.768		165.7	159	153.5	184	130.4	158.4	118.9	127.2	145.3	165.6
Q99J99	Mpst	PE	3-mercaptopyruvate sulfurtransferase OS=Mus musculus GN=Mpst PE=1 SV=3	10.7744	3	3	3	297	33.002	6.58				0.714	1.102	0.866	0.974	0.809	0.858	0.72	0.997		214.9	164.2	153.4	236.8	137.8	186.2	209.3	190.7	173.8	191.4
Q8K1R7	Nek9	PE	Serine/threonine-protein kinase Nek9 OS=Mus musculus GN=Nek9 PE=1 SV=2	1.52439	2	2	2	984	107.075	5.63				1.042	0.999	1.083	1.224	1.453	0.942	0.93	1.278		146.9	124.6	153.1	146.7	123	159	179.7	169	213.4	132.2
P70670	Naca	PE	Nascent polypeptide-associated complex subunit alpha, muscle-specific form OS=Mus musculus GN=Naca PE=1 SV=2	1.00594	2	2	2	2187	220.364	9.35				1.382	0.995	1.755	0.924	2.611	0.976	1.289	0.504		110.4	160	152.5	109.8	211.4	193.7	102	82.6	288.2	164
O09046	Il4i1	PE	L-amino-acid oxidase OS=Mus musculus GN=Il4i1 PE=1 SV=1	6.66667	4	4	4	630	70.147	6.83				0.74	1.02	0.868	0.643	0.457	0.684	0.694	0.57		205.3	154.9	152	209.4	157	178.2	132.1	129	93.9	226.4
Q6PHZ2	Camk2d	PE	Calcium/calmodulin-dependent protein kinase type II subunit delta OS=Mus musculus GN=Camk2d PE=1 SV=1	3.20641	2	2	1	499	56.334	7.25				0.911	0.79	0.886	1.138	1.105	1.012	0.768	1.247		166.9	129.9	152	131.9	98.6	147.9	189.9	160.2	184.3	128.4
F8VQ05	Fryl	PE	FRY-like transcription coactivator OS=Mus musculus GN=Fryl PE=1 SV=1	1.86232	5	5	5	3007	337.605	5.63				0.767	1.187	1.14	1.01	0.831	0.935	0.712	0.926		197.6	185.1	151.5	234.6	141	225.3	199.6	183.3	164.1	198
Q8VHR5	Gatad2b	PE	Transcriptional repressor p66-beta OS=Mus musculus GN=Gatad2b PE=1 SV=1	15.1515	7	9	6	594	65.37	9.7				0.855	0.942	0.847	1.182	1.049	0.936	0.802	1.127		176.1	125.2	150.6	165.9	107.3	149.2	208.2	150.8	184.7	133.8
Q9Z0H1	Wdr46	PE	WD repeat-containing protein 46 OS=Mus musculus GN=Wdr46 PE=2 SV=1	7.55627	4	4	4	622	69.005	9.77				1.022	0.84	1	1.195	1.042	0.844	4.116	0.921		147.3	121.1	150.6	123.8	590.9	147.3	176	132.2	153.5	143.6
A2A484	Zmynd8	PE	Zinc finger, MYND-type-containing 8 OS=Mus musculus GN=Zmynd8 PE=1 SV=1	0.566802	1	1	2	1235	136.857	7.52				0.913	1.072	0.761	1.721	1.269	0.77	0.583	1.608		164.9	127.4	150.5	176.8	96.5	125.4	283.7	266.2	209.2	165.5
Q9D173	Tomm7	PE	Mitochondrial import receptor subunit TOM7 homolog OS=Mus musculus GN=Tomm7 PE=3 SV=1	10.9091	1	1	1	55	6.173	10.17				3.773	1.545	1.622	1.925	1.894	0.724	4.867	0.779		39.9	43.2	150.5	61.6	290.2	64.7	76.8	46.4	75.5	59.6
Q6S5J6	Krit1	PE	Krev interaction trapped protein 1 OS=Mus musculus GN=Krit1 PE=1 SV=1	0.951087	1	1	1	736	83.928	8.38				15.362	2.118	20.85	0.635	13.223	16.839	6.404	23.318		9.8	332.5	150.1	20.7	126.5	203.8	6.2	460.5	129.2	19.7
Q8R2S9	Actr8	PE	Actin-related protein 8 OS=Mus musculus GN=Actr8 PE=2 SV=1	3.36538	2	2	2	624	70.501	7.77				0.906	1.087	0.888	1.158	0.85	0.943	0.666	1.143		165.6	135.5	150.1	180.1	95.7	147.1	191.8	164.2	140.8	143.7
O08756	Hsd17b10	PE	3-hydroxyacyl-CoA dehydrogenase type-2 OS=Mus musculus GN=Hsd17b10 PE=1 SV=4	17.2414	4	5	4	261	27.402	8.41				0.89	1.219	0.706	0.944	0.938	0.639	0.551	0.788		168.5	120.3	150	205.3	103.9	119	159.1	148.5	158	188.5
O08573	Lgals9	PE	Galectin-9 OS=Mus musculus GN=Lgals9 PE=1 SV=1	8.49858	3	3	3	353	40.01	9.31				1.171	1.361	1.041	1.169	1.129	0.805	0.79	0.875		127.9	116	149.7	174.1	113.9	133.2	149.5	126.1	144.3	144.1
P62320	Snrpd3	PE	Small nuclear ribonucleoprotein Sm D3 OS=Mus musculus GN=Snrpd3 PE=1 SV=1	15.0794	2	4	2	126	13.907	10.32				0.915	1.016	1.036	1.175	1.158	0.873	1.77	0.851		163.3	143.1	149.4	165.8	290.2	169.2	191.9	139.6	189	164
Q9CSU0	Rprd1b	PE	Regulation of nuclear pre-mRNA domain-containing protein 1B OS=Mus musculus GN=Rprd1b PE=1 SV=2	7.36196	2	2	2	326	36.861	5.97				1.226	0.931	1.124	1.088	1.734	1.025	0.755	0.593		121.8	169	149.4	113.4	124.6	136.9	132.4	97.8	211.2	164.9
Q8R3B7	Brd8	PE	Bromodomain-containing protein 8 OS=Mus musculus GN=Brd8 PE=1 SV=2	3.15457	3	3	3	951	102.546	4.72				0.799	0.954	0.54	1.225	0.834	0.819	0.692	1.082		187	126.1	149.4	178.3	106.6	101	229	166.6	155.9	153.9
Q924K8	Mta3	PE	Metastasis-associated protein MTA3 OS=Mus musculus GN=Mta3 PE=1 SV=1	11.3367	8	12	3	591	67.035	8.88				0.793	1.039	0.67	0.986	0.912	0.752	0.647	0.803		187.9	144.5	149.1	195.3	124.3	125.9	185.3	154.4	171.3	192.2
Q8CFI7	Polr2b	PE	DNA-directed RNA polymerase II subunit RPB2 OS=Mus musculus GN=Polr2b PE=1 SV=2	1.1925	2	2	2	1174	133.825	6.87				0.957	0.986	1.147	1.267	1.429	0.817	0.998	1.087		155.8	126.6	149	153.5	154.8	178.6	197.3	168.5	222.6	155.1
Q07076	Anxa7	PE	Annexin A7 OS=Mus musculus GN=Anxa7 PE=1 SV=2	15.7667	7	7	7	463	49.893	6.18				0.972	0.856	0.946	0.927	1.02	1.202	0.707	0.923		152.9	191.3	148.7	130.8	112.5	144.6	141.8	146.9	156	159.2
P17427	Ap2a2	PE	AP-2 complex subunit alpha-2 OS=Mus musculus GN=Ap2a2 PE=1 SV=2	4.47761	4	4	4	938	103.951	6.93				1.072	0.934	0.998	0.852	1.476	1.275	0.886	0.704		138.7	178.7	148.7	129.6	124.3	138.4	118.2	98.7	204.8	140.2
P01849	Tcra	PE	T-cell receptor alpha chain C region OS=Mus musculus GN=Tcra PE=1 SV=1	7.97101	1	1	1	138	15.485	4.75				1.16	1.186	0.939	1.219	0.82	0.81	0.547	1.093		128.2	107.8	148.7	152.1	72.8	120.4	156.2	145.5	105.1	133.1
Q8CDG3	Vcpip1	PE	Deubiquitinating protein VCIP135 OS=Mus musculus GN=Vcpip1 PE=1 SV=1	4.2623	4	5	4	1220	134.418	7.17				0.911	1.071	0.932	1.113	0.928	0.962	0.752	1.201		163	143.1	148.6	174.6	111.8	152	181.4	178.5	151.3	148.7
Q9WVL3	Slc12a7	PE	Solute carrier family 12 member 7 OS=Mus musculus GN=Slc12a7 PE=1 SV=1	3.23176	3	4	3	1083	119.404	6.51				0.952	0.868	1.105	1.178	1.035	1.034	0.793	1.185		155.9	152.9	148.4	135.4	117.3	172.2	183.7	175.2	161.4	147.9
Q61686	Cbx5	PE	Chromobox protein homolog 5 OS=Mus musculus GN=Cbx5 PE=1 SV=1	8.37696	2	2	2	191	22.172	5.86				0.88	1.081	1.076	2.075	0.911	0.527	0.856	0.702		167.9	126.5	147.7	181.5	205.4	180.8	348.5	168.3	152.9	239.9
Q07417	Acads	PE	Short-chain specific acyl-CoA dehydrogenase, mitochondrial OS=Mus musculus GN=Acads PE=1 SV=2	7.28155	2	3	2	412	44.861	8.47				1.009	1.391	1.126	1.301	1.365	0.688	0.664	0.836		145.9	124.5	147.2	202.9	120.1	164.3	189.8	151.3	199.1	181
P62309	Snrpg	PE	Small nuclear ribonucleoprotein G OS=Mus musculus GN=Snrpg PE=1 SV=1	18.4211	2	3	2	76	8.49	8.88				0.833	1.107	0.844	0.969	1.096	0.904	0.761	0.927		176.4	154.1	147	195.3	129.7	148.9	171	157.9	193.4	170.4
Q61425	Hadh	PE	Hydroxyacyl-coenzyme A dehydrogenase, mitochondrial OS=Mus musculus GN=Hadh PE=1 SV=2	4.77707	2	2	2	314	34.442	8.65				1.254	1.049	1.364	1.04	2.2	0.962	0.705	0.592		117	168.2	146.7	122.7	123.2	159.5	121.7	103.5	257.3	174.8
Q9D3G9	Rhoh	PE	Rho-related GTP-binding protein RhoH OS=Mus musculus GN=Rhoh PE=1 SV=1	18.8482	3	3	3	191	21.311	8.91				1.051	0.955	0.756	1.032	1.243	0.85	1.815	0.536		139	165.5	146.1	132.8	353.4	105.1	143.5	104.4	172.9	194.7
P58682	Tlr8	PE	Toll-like receptor 8 OS=Mus musculus GN=Tlr8 PE=1 SV=2	0.678295	1	1	1	1032	119.282	7.31				0.944	0.986	1.074	0.828	1.085	0.955	0.624	0.567		154.9	155.8	146.1	152.7	101.8	166.3	128.3	92.6	168	163.2
Q8VDP2	1	SV	UPF0428 protein CXorf56 homolog OS=Mus musculus PE=1 SV=1	19.8198	4	4	4	222	25.578	8.73				0.841	1.15	0.893	1.243	0.932	0.966	1.047	0.966		173.6	163.1	146	199.7	176.8	155.1	215.8	163.2	161.8	168.9
P63166	Sumo1	PE	Small ubiquitin-related modifier 1 OS=Mus musculus GN=Sumo1 PE=1 SV=1	35.6436	4	4	4	101	11.55	5.52				0.795	1.351	1.151	1.306	0.865	0.586	0.712	0.743		183.4	136.8	145.7	247.8	166.4	211.1	239.6	173.6	158.7	233.7
P51150	Rab7a	PE	Ras-related protein Rab-7a OS=Mus musculus GN=Rab7a PE=1 SV=2	16.4251	3	3	3	207	23.475	6.7				0.963	1.026	0.98	1.111	1.341	0.937	0.697	0.826		151.3	150	145.7	155.2	111.6	148.3	168.2	132.3	203	160.1
O35593	Psmd14	PE	26S proteasome non-ATPase regulatory subunit 14 OS=Mus musculus GN=Psmd14 PE=1 SV=2	8.70968	2	2	2	310	34.555	6.52				1.062	4.035	1.038	1.258	0.948	0.614	0.298	0.335		137	272.7	145.5	552.9	132.3	142.3	172.4	148.9	129.9	444.2
Q9CYN2	Spcs2	PE	Signal peptidase complex subunit 2 OS=Mus musculus GN=Spcs2 PE=1 SV=1	7.07965	2	3	2	226	24.962	8.57				1.225	1.004	1.163	0.775	1.975	0.785	0.644	0.546		118.6	144.3	145.3	119.2	118.5	138	91.9	100.4	234.4	183.9
Q9DC69	Ndufa9	PE	NADH dehydrogenase [ubiquinone] 1 alpha subcomplex subunit 9, mitochondrial OS=Mus musculus GN=Ndufa9 PE=1 SV=2	11.4058	4	5	4	377	42.498	9.74				0.91	1.309	1.391	1.06	1.617	1.065	0.978	0.886		159.4	205.8	145.1	208.7	188.8	221.9	169	171.2	257.8	193.1
P03888	Mtnd1	PE	NADH-ubiquinone oxidoreductase chain 1 OS=Mus musculus GN=Mtnd1 PE=1 SV=3	5.03145	2	2	2	318	36.035	6.93				1.031	1.096	0.87	0.918	1.394	0.669	0.496	0.775		140.7	107.8	145	154.1	79.9	122.4	129.2	125	196	161.2
Q9DC70	Ndufs7	PE	NADH dehydrogenase [ubiquinone] iron-sulfur protein 7, mitochondrial OS=Mus musculus GN=Ndufs7 PE=1 SV=1	13.3929	3	3	3	224	24.667	9.92				0.898	1.102	0.999	1.29	1.156	0.857	1.039	1.148		161.3	140.6	144.9	177.7	170.4	161.2	208.1	188.3	186.5	164.1
P07743	Bpifa2	PE	BPI fold-containing family A member 2 OS=Mus musculus GN=Bpifa2 PE=1 SV=1	9.3617	2	2	2	235	24.738	5.01				1.367	1.683	1.514	0.769	0.999	1.573	1.211	0.875		105.8	164.9	144.6	178.1	126.9	160.3	81.4	91.7	105.8	104.8
P30416	Fkbp4	PE	Peptidyl-prolyl cis-trans isomerase FKBP4 OS=Mus musculus GN=Fkbp4 PE=1 SV=5	5.24017	3	3	3	458	51.54	5.72				1.466	0.973	1.693	0.703	2.815	1.026	0.736	0.628		98.5	153.1	144.5	95.9	109.8	166.8	69.3	93.7	277.4	149.3
P97762	rp9	PE	Retinitis pigmentosa 9 protein homolog OS=Mus musculus GN=rp9 PE=1 SV=1	22.5352	5	5	5	213	25.246	9.83				0.427	0.481	0.451	0.492	0.453	0.782	0.815	0.908		337.9	149.7	144.4	162.6	156.1	152.4	166.3	173.8	153	191.5
Q9D824	Fip1l1	PE	Pre-mRNA 3'-end-processing factor FIP1 OS=Mus musculus GN=Fip1l1 PE=1 SV=1	5.67986	3	3	3	581	64.92	5.77				1.242	1.351	1.127	1.358	2.072	0.874	0.901	1.05		116.2	130.8	144.3	157	134.8	131	157.7	157	240.7	149.6
P41105	Rpl28	PE	60S ribosomal protein L28 OS=Mus musculus GN=Rpl28 PE=1 SV=2	17.5182	3	3	3	137	15.724	12.02				1.206	1.314	1.342	0.737	1.255	1.36	1.463	1.197		119.4	145.4	144	156.8	156.5	160.2	88	127.9	149.8	106.9
Q9EPB4	Pycard	PE	Apoptosis-associated speck-like protein containing a CARD OS=Mus musculus GN=Pycard PE=1 SV=1	7.77202	2	2	2	193	21.445	5.43				1.394	1.097	1.337	0.74	2.901	1.091	0.427	0.401		103	176.4	143.6	113	69.1	137.7	76.2	64.9	298.8	161.7
P46062	Sipa1	PE	Signal-induced proliferation-associated protein 1 OS=Mus musculus GN=Sipa1 PE=1 SV=2	1.35005	2	2	2	1037	111.997	6.35				1.036	1.46	0.853	1.308	1.489	0.571	0.551	0.686		138.1	115.3	143.1	201.6	111.2	117.8	180.6	138.7	205.7	202
Q9DBR1	Xrn2	PE	5'-3' exoribonuclease 2 OS=Mus musculus GN=Xrn2 PE=1 SV=1	6.72976	6	6	6	951	108.618	7.59				1.001	1.004	1.097	1.195	1.663	1.187	2.494	1.044		142.8	176.6	143	143.3	370.9	156.6	170.7	155.2	237.4	148.8
Q9Z1X4	Ilf3	PE	Interleukin enhancer-binding factor 3 OS=Mus musculus GN=Ilf3 PE=1 SV=2	4.12027	3	4	3	898	95.961	8.76				1.238	1.173	1.279	1.447	1.43	1.004	1.026	0.801		115.5	156.5	143	135.5	160	147.8	167.2	124.9	165.3	155.9
Q9JII5	Dazap1	PE	DAZ-associated protein 1 OS=Mus musculus GN=Dazap1 PE=1 SV=2	13.5468	4	5	4	406	43.187	8.56				1.066	1.099	1.032	1.374	1.281	0.967	1.429	0.803		134.1	150.8	143	147.3	222.7	138.4	184.2	125.2	171.7	155.9
Q9ERA6	Tfip11	PE	Tuftelin-interacting protein 11 OS=Mus musculus GN=Tfip11 PE=1 SV=1	4.05728	3	3	3	838	96.244	5.9				1.179	1.196	1.008	1.276	1.119	0.813	0.928	1.199		120.9	107.1	142.6	144.6	122.3	121.8	154.2	157.8	135.2	131.7
Q9CZW5	Tomm70	PE	Mitochondrial import receptor subunit TOM70 OS=Mus musculus GN=Tomm70 PE=1 SV=2	2.29133	2	2	2	611	67.547	7.53				1.65	1.321	1.548	0.959	2.279	0.771	1.071	0.525		86.1	111	142	113.7	154.2	133.2	82.5	75.5	196.2	144
Q8BHZ0	Fam49a	PE	Protein FAM49A OS=Mus musculus GN=Fam49a PE=1 SV=1	11.1455	4	5	3	323	37.319	6.01				0.666	0.755	0.861	0.452	0.794	1.084	0.63	0.491		213	206	141.8	160.7	119.8	183.4	96.3	93.2	169.1	190
Q99LH1	Gnl2	PE	Nucleolar GTP-binding protein 2 OS=Mus musculus GN=Gnl2 PE=1 SV=2	3.43407	3	3	3	728	83.294	9.2				0.852	1.121	0.737	1	0.788	0.984	1.932	1.471		166.4	141.7	141.7	186.5	278.1	122.6	166.4	211.8	131	144
P19157	Gstp1	PE	Glutathione S-transferase P 1 OS=Mus musculus GN=Gstp1 PE=1 SV=2	10.9524	2	2	2	210	23.594	7.87				1.856	1.173	1.553	0.584	3.192	1.114	0.497	0.482		76.3	144.3	141.6	89.5	64.4	118.5	44.5	62.4	243.5	129.5
P56399	Usp5	PE	Ubiquitin carboxyl-terminal hydrolase 5 OS=Mus musculus GN=Usp5 PE=1 SV=1	3.84615	3	4	3	858	95.772	5.01				1.704	1.051	1.542	0.771	2.147	1.292	0.874	1.039		83	119.1	141.4	87.3	80.5	128	64	95.8	178.2	92.1
P62996	Tra2b	PE	Transformer-2 protein homolog beta OS=Mus musculus GN=Tra2b PE=1 SV=1	11.8056	3	4	3	288	33.646	11.25				0.64	0.766	0.754	0.762	0.701	0.942	1.367	0.853		221	129.7	141.4	169.4	188.2	166.7	168.4	117.4	155	137.7
O09061	Psmb1	PE	Proteasome subunit beta type-1 OS=Mus musculus GN=Psmb1 PE=1 SV=1	19.1667	4	4	4	240	26.355	7.81				0.907	0.909	1.091	0.775	1.285	1.341	1.064	0.947		155.5	181.1	141.1	141.3	143.8	169.7	120.6	127.9	199.9	135.1
Q8C6G8	Wdr26	PE	WD repeat-containing protein 26 OS=Mus musculus GN=Wdr26 PE=1 SV=3	3.74415	3	3	3	641	70.499	6.16				0.89	1.16	1.191	0.832	0.917	0.757	0.914	0.841		158.5	144.3	141.1	183.9	174.2	188.8	131.8	160.3	145.3	190.6
Q8BP86	Snapc4	PE	snRNA-activating protein complex subunit 4 OS=Mus musculus GN=Snapc4 PE=1 SV=2	2.92573	4	4	4	1333	147.322	8.53				0.657	0.942	0.68	0.905	0.766	0.927	0.687	1.144		214.6	148	141.1	202.2	109.7	145.9	194.1	182.6	164.5	159.6
Q9CZ44	Nsfl1c	PE	NSFL1 cofactor p47 OS=Mus musculus GN=Nsfl1c PE=1 SV=1	13.7838	4	4	4	370	40.685	5.15				1.234	1.098	1.344	0.972	2.023	0.943	0.629	0.616		113.7	172.5	140.3	124.9	115	152.8	110.5	112.6	230.1	183
Q91WC0	Setd3	PE	Histone-lysine N-methyltransferase setd3 OS=Mus musculus GN=Setd3 PE=1 SV=1	1.51515	1	1	1	594	67.134	5.6				0.262	0.369	0.524	0.398	0.42	0.848	0.937	1.072		533.1	254.6	139.8	197	281.4	279.5	212.1	322.1	223.9	300.3
Q8C176	Taf2	PE	Transcription initiation factor TFIID subunit 2 OS=Mus musculus GN=Taf2 PE=2 SV=2	1.44928	2	2	2	1104	126.915	8.1				0.818	1.242	0.816	1.26	0.98	0.859	0.757	1.087		170.6	123.5	139.6	211.8	108.8	139.2	215	156.3	167.1	143.8
P04627	Araf	PE	Serine/threonine-protein kinase A-Raf OS=Mus musculus GN=Araf PE=1 SV=2	2.48344	2	2	2	604	67.538	9.11				1.197	1.137	1.336	1.072	1.516	1.02	1.779	0.982		116.7	137.3	139.6	132.6	239.5	155.8	125.1	132.2	176.8	134.6
P62743	Ap2s1	PE	AP-2 complex subunit sigma OS=Mus musculus GN=Ap2s1 PE=1 SV=1	13.3803	2	2	2	142	17.007	6.18				0.531	0.643	0.48	0.654	0.558	0.879	0.548	0.753		262	157.6	139.2	168.5	98.2	125.9	171.4	135	146.2	179.3
Q8CD15	Mina	PE	Bifunctional lysine-specific demethylase and histidyl-hydroxylase MINA OS=Mus musculus GN=Mina PE=1 SV=2	9.24731	4	4	4	465	53.483	6.38				1.022	0.974	0.966	1.286	0.901	1.317	0.912	1.355		136	139.7	139	132.4	96.7	131.4	174.8	143.8	122.5	106.1
Q9D379	Ephx1	PE	Epoxide hydrolase 1 OS=Mus musculus GN=Ephx1 PE=1 SV=2	9.01099	4	4	4	455	52.543	8.35				1.058	0.795	1.178	0.708	1.868	0.697	0.662	0.629		131.1	138.2	138.8	104.3	131.2	154.5	92.9	124.6	245	198.1
B9EKR1	Ptprz1	PE	Receptor-type tyrosine-protein phosphatase zeta OS=Mus musculus GN=Ptprz1 PE=1 SV=1	0.259516	1	2	1	2312	254.247	4.88				2.401	0.894	1.968	1.069	2.318	1.626	1.412	2.626		57.7	107	138.5	51.6	92.9	113.5	61.7	172.8	133.8	65.8
A2AF47	Dock11	PE	Dedicator of cytokinesis protein 11 OS=Mus musculus GN=Dock11 PE=1 SV=1	1.25422	3	3	3	2073	237.619	7.78				1.057	1.257	1.322	1.194	1.826	0.749	0.909	0.791		130.9	133.5	138.4	164.6	162	173	156.3	140.9	239	178.2
Q99JR8	Smarcd2	PE	SWI/SNF-related matrix-associated actin-dependent regulator of chromatin subfamily D member 2 OS=Mus musculus GN=Smarcd2 PE=1 SV=2	11.1111	5	6	4	531	59.048	9.64				0.906	1.122	1.024	0.968	1.197	0.91	0.914	0.767		152.6	158.5	138.3	171.3	159.3	156.3	147.7	133.7	182.7	174.3
Q9ESX4	Zcchc17	PE	Nucleolar protein of 40 kDa OS=Mus musculus GN=Zcchc17 PE=1 SV=1	19.917	4	5	4	241	27.454	9.63				0.928	1.277	0.857	1.234	0.882	0.693	0.895	1.113		149.1	104.6	138.3	190.4	135.2	127.8	183.9	168.1	131.5	151
Q99LI8	Hgs	PE	Hepatocyte growth factor-regulated tyrosine kinase substrate OS=Mus musculus GN=Hgs PE=1 SV=2	3.35484	3	3	3	775	85.961	6.16				1.159	1.212	0.848	1.478	1.2	1.131	0.683	1.261		119.1	116.1	138.1	144.3	70.1	101	175.9	129.4	142.9	102.7
Q9Z1T1	Ap3b1	PE	AP-3 complex subunit beta-1 OS=Mus musculus GN=Ap3b1 PE=1 SV=2	1.62896	2	2	2	1105	122.664	5.66				0.905	1.058	0.801	0.934	1.006	0.873	0.489	0.75		152.6	169.9	138	161.5	95.2	122.2	142.6	145.9	153.5	194.7
Q9CQA3	Sdhb	PE	Succinate dehydrogenase [ubiquinone] iron-sulfur subunit, mitochondrial OS=Mus musculus GN=Sdhb PE=1 SV=1	12.766	3	3	3	282	31.793	8.68				0.845	0.961	1.054	0.795	1.251	0.815	0.913	0.737		163.4	134.9	138	157	151.2	172.3	129.9	122	204.3	165.5
O35326	Srsf5	PE	Serine/arginine-rich splicing factor 5 OS=Mus musculus GN=Srsf5 PE=1 SV=2	5.94796	2	2	1	269	30.873	11.56				1.329	1.042	1.444	0.724	1.696	0.738	0.987	0.561		103.8	120.1	137.9	108.1	160.6	149.9	75.2	91.3	176	162.8
Q5SUR0	Pfas	PE	Phosphoribosylformylglycinamidine synthase OS=Mus musculus GN=Pfas PE=1 SV=1	3.21616	3	3	3	1337	144.538	5.67				0.871	1.143	1.003	0.704	1.251	1.185	0.929	1.125		158.1	170.2	137.8	180.7	133.4	158.7	111.3	161.5	197.9	143.6
Q0IIK2			TREMBL:Q0IIK2 (Bos taurus) Transferrin	7.10227	5	5	5	704	77.689	7.08		Y	Y	1.135	1.987	3.776	2.53	1.935	0.82	1.004	0.395		120.9	156.6	137.2	240.2	191.8	456.5	305.8	75.4	234	191.1
Q8BYK6	Ythdf3	PE	YTH domain-containing family protein 3 OS=Mus musculus GN=Ythdf3 PE=1 SV=2	7.86325	4	4	4	585	63.922	9.04				0.889	1.083	0.851	1.254	0.933	0.825	1.042	0.839		153.8	122.6	136.7	166.6	154.8	130.9	192.9	124.8	143.5	148.6
P26638	Sars	PE	Serine--tRNA ligase, cytoplasmic OS=Mus musculus GN=Sars PE=1 SV=3	4.6875	3	3	3	512	58.352	6.3				0.699	1.026	1.024	0.451	1.322	1.233	0.663	0.822		195.2	180	136.5	200.2	96.8	199.9	88	120	258.1	146
P62305	Snrpe	PE	Small nuclear ribonucleoprotein E OS=Mus musculus GN=Snrpe PE=1 SV=1	11.9565	1	4	1	92	10.797	9.44				0.81	0.738	0.746	1.117	0.879	0.713	0.652	0.69		168.6	123	136.5	124.4	112.5	125.8	188.2	119	148.2	172.5
E9Q2E4	Gm15800	PE	Uncharacterized protein OS=Mus musculus GN=Gm15800 PE=1 SV=2	0.181077	1	1	1	4418	483.821	6.06				0.601	0.993	0.557	0.817	0.522	0.808	0.528	1.014		226.3	140.4	136	224.8	91.8	126.1	184.9	176.2	118.2	173.8
O35855	Bcat2	PE	Branched-chain-amino-acid aminotransferase, mitochondrial OS=Mus musculus GN=Bcat2 PE=1 SV=2	7.88804	3	4	3	393	44.099	8.29				1.125	1.391	1.122	1.097	1.606	0.378	0.237	0.317		120.8	134.8	135.8	168	84.3	135.6	132.5	112.9	193.9	356.3
Q6ZPE2	Sbf1	PE	Myotubularin-related protein 5 OS=Mus musculus GN=Sbf1 PE=1 SV=2	1.44617	3	3	3	1867	208.561	7.12				0.798	0.991	1.185	1.044	1.168	0.634	0.627	0.762		170.3	122.2	135.8	168.7	120.8	201.9	177.8	146.8	199	192.7
Q8BG48	Stk17b	PE	Serine/threonine-protein kinase 17B OS=Mus musculus GN=Stk17b PE=1 SV=1	4.83871	2	2	2	372	41.956	5.31				1.438	1.365	1.461	0.894	2.279	1.095	1.078	0.709		94.1	139.4	135.3	128.5	137.2	137.5	84.1	90.2	214.4	127.3
Q8BWG8	Arrb1	PE	Beta-arrestin-1 OS=Mus musculus GN=Arrb1 PE=1 SV=1	1.67464	1	1	1	418	46.943	6.28				1.63	1.45	1.666	1.283	3.612	1.049	0.684	0.666		82.8	161.1	135	120.1	105	138	106.3	102.2	299.1	153.5
Q6NZN0	Rbm26	PE	RNA-binding protein 26 OS=Mus musculus GN=Rbm26 PE=1 SV=2	4.24901	4	4	4	1012	114.073	9.16				0.861	0.916	0.874	1.065	0.981	1.011	0.831	1.17		156.1	127.6	134.4	143	104.9	136.4	166.3	147.6	153.1	126.2
P09671	Sod2	PE	Superoxide dismutase [Mn], mitochondrial OS=Mus musculus GN=Sod2 PE=1 SV=3	4.05405	1	3	1	222	24.588	8.62				1.365	1.166	1.817	1.002	2.527	1.02	0.731	0.522		98.3	154.9	134.3	114.7	111.1	178.7	98.6	79.3	248.6	151.9
P08775	Polr2a	PE	DNA-directed RNA polymerase II subunit RPB1 OS=Mus musculus GN=Polr2a PE=1 SV=3	1.37056	3	3	3	1970	217.039	7.37				0.967	1.511	1.069	1.282	1.13	0.926	0.911	1.102		138.4	155.9	133.9	209.2	153.4	147.9	177.5	185.5	156.4	168.3
Q9ERV7	Pidd1	PE	p53-induced death domain-containing protein 1 OS=Mus musculus GN=Pidd1 PE=1 SV=1	0.765027	1	1	1	915	101.078	6.4				3.185	0.695	3.898	0.874	3.445	3.943	1.598	4.484		41.9	267.5	133.6	29.1	108.4	163.5	36.7	304.2	144.5	67.8
P21550	Eno3	PE	Beta-enolase OS=Mus musculus GN=Eno3 PE=1 SV=3	17.5115	5	10	1	434	46.995	7.18				0.793	2.076	1.778	1.098	0.943	1.255	1.19	0.557		168.4	257.7	133.5	349.6	244.4	299.3	184.9	114.3	158.9	205.3
Q09XV5	Chd8	PE	Chromodomain-helicase-DNA-binding protein 8 OS=Mus musculus GN=Chd8 PE=1 SV=1	1.08443	3	3	3	2582	290.666	6.42				0.971	1.301	0.93	1.038	0.93	0.833	0.718	0.885		137.1	119.2	133.2	178.4	102.8	127.5	142.3	126.6	127.5	143.1
P97364	Sephs2	PE	Selenide, water dikinase 2 OS=Mus musculus GN=Sephs2 PE=1 SV=3	1.32743	1	1	1	452	47.804	6.06				2.228	1.397	1.496	0.754	2.72	1.168	0.675	0.411		59.8	105.9	133.2	83.5	61.2	89.4	45.1	37.2	162.6	90.7
Q80UZ2	Sdad1	PE	Protein SDA1 homolog OS=Mus musculus GN=Sdad1 PE=1 SV=1	6.69578	5	5	5	687	79.508	9.2				1.141	1.324	1.458	0.983	1.148	1.175	1.612	1.185		116.5	120.8	133	154.3	165.7	169.9	114.6	121.8	133.8	102.8
Q9D0M0	Exosc7	PE	Exosome complex exonuclease RRP42 OS=Mus musculus GN=Exosc7 PE=1 SV=2	6.52921	2	2	2	291	31.805	5.19				1.131	0.954	0.951	0.871	1.193	1.197	1.022	1.073		117.5	127.6	132.9	112.1	108.9	111.8	102.4	114.4	140.2	106.6
G3X9B1	Heatr1	PE	HEAT repeat containing 1 OS=Mus musculus GN=Heatr1 PE=1 SV=1	1.35324	3	3	3	2143	241.917	6.98				0.979	0.983	1.353	0.913	0.665	0.929	0.934	0.671		135.1	124.3	132.2	132.8	125	182.7	123.3	89.8	89.8	133.8
P40630	Tfam	PE	Transcription factor A, mitochondrial OS=Mus musculus GN=Tfam PE=1 SV=2	15.2263	4	6	4	243	27.97	9.69				0.947	1.115	1.753	1.631	1.134	0.929	8.359	1.045		139.4	130.7	132	155.5	1176.5	244.4	227.5	147	158.1	140.7
Q9JHW4	Eefsec	PE	Selenocysteine-specific elongation factor OS=Mus musculus GN=Eefsec PE=1 SV=2	4.28816	2	2	2	583	63.498	8.29				1.32	0.893	1.39	0.691	3.273	0.919	0.853	0.407		99.9	141.5	131.9	89.2	131.4	139	69.1	62.7	327.1	154
P97760	Polr2c	PE	DNA-directed RNA polymerase II subunit RPB3 OS=Mus musculus GN=Polr2c PE=1 SV=2	2.54545	1	1	1	275	31.424	4.92				1.139	0.991	1.069	1.309	1.283	0.804	0.778	0.754		115.8	110.1	131.9	114.8	106.5	123.8	151.7	103.2	148.6	137
Q60790	Rasa3	PE	Ras GTPase-activating protein 3 OS=Mus musculus GN=Rasa3 PE=1 SV=2	2.15827	2	2	2	834	95.926	7.34				1.096	0.892	0.874	1.003	1.472	0.99	0.529	0.634		119.8	131.8	131.3	106.9	70.5	104.7	120.2	84.4	176.3	133.1
Q9EQ20	Aldh6a1	PE	Methylmalonate-semialdehyde dehydrogenase [acylating], mitochondrial OS=Mus musculus GN=Aldh6a1 PE=1 SV=1	6.35514	4	4	4	535	57.879	8.07				0.864	1.488	1.176	0.867	1.129	0.877	0.938	1.03		151.8	128.3	131.1	225.9	137.3	178.5	131.6	150.8	171.4	146.4
Q7TSV4	Pgm2	PE	Phosphoglucomutase-2 OS=Mus musculus GN=Pgm2 PE=1 SV=1	5.32258	3	3	3	620	68.704	6.14				1.178	1.497	1.352	0.8	1.805	1.138	0.766	0.479		111.2	168	131.1	166.5	113.1	150.5	89	70.6	200.8	147.6
Q9EQK5	Mvp	PE	Major vault protein OS=Mus musculus GN=Mvp PE=1 SV=4	2.32288	3	4	3	861	95.865	5.59				0.703	0.474	0.509	1.091	0.481	0.849	0.663	0.679		186.1	115.1	130.9	88.3	89.9	94.8	203	92.1	89.5	135.6
Q6ZWX6	Eif2s1	PE	Eukaryotic translation initiation factor 2 subunit 1 OS=Mus musculus GN=Eif2s1 PE=1 SV=3	6.34921	2	3	2	315	36.085	5.08				1.255	0.823	1.091	1.005	1.952	1.18	0.784	0.496		104	151.1	130.4	85.6	100.3	113.4	104.5	63.5	203	128
Q6ZQI3	Mlec	PE	Malectin OS=Mus musculus GN=Mlec PE=1 SV=2	5.49828	2	2	2	291	32.322	6.05				1.374	1.308	1.537	1.06	2.532	1.069	0.835	0.678		94.8	152.8	130.2	124	119.3	145.7	100.5	97	240.1	142.9
Q3UVG3	Fam91a1	PE	Protein FAM91A1 OS=Mus musculus GN=Fam91a1 PE=1 SV=1	3.22581	3	4	3	837	93.404	6.35				0.765	0.972	0.712	0.998	0.765	0.806	0.559	1.162		169.9	123.9	130	165.1	85.9	121	169.6	178.6	129.9	153.7
O35841	Api5	PE	Apoptosis inhibitor 5 OS=Mus musculus GN=Api5 PE=1 SV=2	3.1746	2	2	2	504	56.75	5.92				1.131	0.979	1.202	0.651	2.26	1.047	0.983	0.837		114.9	147.7	129.9	112.5	138.7	138.2	74.8	118.1	259.6	141.1
Q8K1J6	Trnt1	PE	CCA tRNA nucleotidyltransferase 1, mitochondrial OS=Mus musculus GN=Trnt1 PE=1 SV=1	4.83871	3	3	3	434	49.864	8.56				0.916	1.131	1.222	0.833	1.73	1.073	0.627	0.527		141.8	200.8	129.8	160.4	117.4	173.3	118.1	98.7	245.4	187.2
Q6P3B9	Rbfa	PE	Putative ribosome-binding factor A, mitochondrial OS=Mus musculus GN=Rbfa PE=2 SV=1	13.7143	4	4	4	350	39.293	7.33				0.894	0.981	0.814	0.776	0.566	1.032	1.149	1.065		145	114.1	129.7	142.3	127	118	112.6	117.7	82	110.5
O55143	Atp2a2	PE	Sarcoplasmic/endoplasmic reticulum calcium ATPase 2 OS=Mus musculus GN=Atp2a2 PE=1 SV=2	2.68199	3	4	2	1044	114.784	5.34				1.541	1.129	1.783	1.145	2.65	1.016	0.846	0.706		83.9	110.4	129.3	94.7	91.9	149.6	96.1	76.6	222.3	108.6
E9PWH2	Card6	PE	Caspase recruitment domain family, member 6 OS=Mus musculus GN=Card6 PE=4 SV=1	6.04255	6	9	6	1175	131.387	8.09				0.805	1.172	0.641	1.085	0.741	0.993	0.871	1.159		160	157.3	128.8	187.5	138.1	102.6	173.6	183.7	118.5	158.5
Q9ER88	Dap3	PE	28S ribosomal protein S29, mitochondrial OS=Mus musculus GN=Dap3 PE=1 SV=1	1.53453	1	1	1	391	44.671	8.94				0.8	1.275	0.936	1.115	1.104	0.781	0.888	0.948		160.3	115.6	128.3	204.4	131.6	150	178.7	140.4	176.9	148.1
Q91VM5	Rbmxl1	PE	RNA binding motif protein, X-linked-like-1 OS=Mus musculus GN=Rbmxl1 PE=1 SV=1	31.1856	14	16	2	388	42.136	9.99				1.113	0.928	1.18	1.345	1.079	0.623	2.595	0.824		115	82.4	127.9	106.7	343.3	135.7	154.6	109	124	132.3
Q9DCE9	Igtp	PE	Interferon gamma-induced GTPase OS=Mus musculus GN=Igtp PE=1 SV=1	5.43735	3	3	3	423	48.463	7.77				1.012	1.4	1.289	0.671	1.956	0.934	0.972	0.497		126.3	148.3	127.9	176.9	154.5	162.9	84.8	78.9	247.1	158.9
A2A5R2	Arfgef2	PE	Brefeldin A-inhibited guanine nucleotide-exchange protein 2 OS=Mus musculus GN=Arfgef2 PE=1 SV=1	0.837054	2	2	2	1792	202.11	6.55				1.084	1.441	1.302	0.994	1.148	0.925	0.799	0.638		117.8	138	127.7	169.6	119.3	153.3	117.1	95.3	135.2	149.2
O08807	Prdx4	PE	Peroxiredoxin-4 OS=Mus musculus GN=Prdx4 PE=1 SV=1	9.48905	3	5	1	274	31.033	7.15				0.835	1.102	0.873	1.421	0.413	1.648	0.687	0.763		152.5	201.7	127.4	168.1	84	133.1	216.6	93.3	63	122.4
Q99JB2	Stoml2	PE	Stomatin-like protein 2, mitochondrial OS=Mus musculus GN=Stoml2 PE=1 SV=1	10.1983	3	3	3	353	38.361	8.87				0.75	0.928	0.835	0.81	0.852	0.932	0.815	0.754		169.6	130.6	127.1	157.4	114.2	141.6	137.3	105.7	144.6	140.1
D3Z7P3	Gls	PE	Glutaminase kidney isoform, mitochondrial OS=Mus musculus GN=Gls PE=1 SV=1	4.00593	2	2	2	674	73.916	7.99				1.12	1.202	1.225	1.333	1.933	0.438	0.294	0.368		113.5	124.6	127.1	136.4	83.7	139.1	151.4	104.8	219.4	284.9
Q8C1A5	Thop1	PE	Thimet oligopeptidase OS=Mus musculus GN=Thop1 PE=1 SV=1	4.07569	2	2	2	687	77.976	6.06				0.992	0.998	1.162	1.035	1.452	0.97	0.78	0.573		127.9	150.7	126.8	127.6	121.2	148.5	132.3	89	185.6	155.3
Q6NVE8	Wdr44	PE	WD repeat-containing protein 44 OS=Mus musculus GN=Wdr44 PE=1 SV=1	2.40437	2	2	2	915	101.493	5.24				0.87	0.985	0.87	1.18	0.965	1.054	0.643	0.985		145.4	146.6	126.5	143.2	89.5	126.5	171.6	137	140.2	139.1
Q8BMQ2	Gtf3c4	PE	General transcription factor 3C polypeptide 4 OS=Mus musculus GN=Gtf3c4 PE=1 SV=2	1.71359	2	2	2	817	91.554	6.73				0.882	0.758	0.876	0.985	1.39	0.765	0.625	1.473		143.4	132.7	126.5	108.8	108.4	125.6	141.3	255.5	199.4	173.5
P63254	Crip1	PE	Cysteine-rich protein 1 OS=Mus musculus GN=Crip1 PE=1 SV=2	22.0779	2	3	2	77	8.544	8.57				0.947	1.234	0.973	1.537	1.299	0.874	2.63	0.787		133.4	157.3	126.3	164.6	473.1	129.8	205	141.6	173.2	179.9
P97386	Lig3	PE	DNA ligase 3 OS=Mus musculus GN=Lig3 PE=1 SV=2	0.591133	1	1	1	1015	113	8.98				1.694	1.248	1.209	1.539	1.562	1.051	2.325	0.995		74.5	68.2	126.1	92.9	151	90	114.6	64.6	116.3	64.9
A0A0J9YUD5	Nup205	PE	Nucleoporin 205 OS=Mus musculus GN=Nup205 PE=1 SV=1	2.28045	4	4	4	2061	232.95	6.62				0.533	0.833	0.723	0.68	0.6	0.671	0.683	0.695		236.7	123	126	197.1	125.1	171.1	161	127.3	142	183.3
P60824	Cirbp	PE	Cold-inducible RNA-binding protein OS=Mus musculus GN=Cirbp PE=1 SV=1	11.6279	2	3	2	172	18.596	9.61				1.141	1.245	1.452	1.12	1.592	1.161	5.277	1.407		110.1	131.8	125.7	137.2	598.9	159.8	123.3	159.6	175.4	113.5
Q6IFX2	Krt42	PE	Keratin, type I cytoskeletal 42 OS=Mus musculus GN=Krt42 PE=1 SV=1	34.9558	21	94	2	452	50.102	5.16		Y	Y	2.992	1.423	1.594	1.904	1.363	2.46	0.837	0.937		41.9	178.7	125.5	59.7	60.8	66.8	79.9	68.1	57.1	72.6
Q9CSP9	Ttc14	PE	Tetratricopeptide repeat protein 14 OS=Mus musculus GN=Ttc14 PE=1 SV=2	2.36531	2	2	2	761	86.739	9				0.953	0.965	0.794	1.264	0.859	1.015	0.64	1.227		131.4	106.6	125.2	126.8	67.2	104.3	166	128.8	112.9	105
Q8K4L4	Pof1b	PE	Protein POF1B OS=Mus musculus GN=Pof1b PE=2 SV=3	3.06644	2	2	2	587	67.742	6.23				1.004	0.495	0.74	0.889	0.348	3.664	0.721	0.806		124.5	316.7	125.1	61.6	62.3	92.2	110.7	69.6	43.3	86.5
Q9D358	Acp1	PE	Low molecular weight phosphotyrosine protein phosphatase OS=Mus musculus GN=Acp1 PE=1 SV=3	13.2911	2	2	2	158	18.18	6.74				1.053	1.092	1.072	1.108	1.385	0.969	2.067	0.738		118.7	143.5	125	129.7	306.2	127.3	131.5	109.4	164.5	148.2
Q811M1	Arhgap15	PE	Rho GTPase-activating protein 15 OS=Mus musculus GN=Arhgap15 PE=1 SV=1	3.5343	2	3	1	481	55.304	9.17				1.254	0.739	1.506	0.882	1.942	1.394	2.004	0.934		99.7	149.3	125	73.6	214.5	150.1	88	99.9	193.6	107
Q7TSI3	Ppp6r1	PE	Serine/threonine-protein phosphatase 6 regulatory subunit 1 OS=Mus musculus GN=Ppp6r1 PE=1 SV=1	5.37383	3	3	3	856	94.468	4.64				0.999	1.274	1.155	1.052	1.161	0.792	0.618	0.747		125	118.5	124.9	159.2	92.4	144.3	131.5	111.7	145.1	149.5
P39749	Fen1	PE	Flap endonuclease 1 OS=Mus musculus GN=Fen1 PE=1 SV=1	7.67196	3	3	3	378	42.288	8.34				1.13	1.326	1.355	1.34	1.719	1.126	0.813	0.988		110.3	160.9	124.7	146.3	116.2	149.4	147.9	141.3	189.6	142.9
P01897	H2-L	PE	H-2 class I histocompatibility antigen, L-D alpha chain OS=Mus musculus GN=H2-L PE=1 SV=2	6.62983	2	3	1	362	40.685	6.25				1.57	1.184	1.515	0.847	2.914	1.035	0.676	0.566		79.2	130.7	124.4	93.8	85.3	120	67.1	71.4	230.9	126.2
Q9JII6	Akr1a1	PE	Alcohol dehydrogenase [NADP(+)] OS=Mus musculus GN=Akr1a1 PE=1 SV=3	8	3	3	3	325	36.564	7.39				1.326	2.063	1.453	0.877	2.732	1.237	0.771	0.532		93.8	165.4	124.3	193.5	103.1	136.3	82.3	71.1	256.3	133.7
Q6NV83	U2surp	PE	U2 snRNP-associated SURP motif-containing protein OS=Mus musculus GN=U2surp PE=1 SV=3	1.55491	2	2	2	1029	118.188	8.47				0.741	1.063	0.847	0.871	1.167	0.932	1.045	1.062		167.1	129.3	123.8	177.5	145.1	141.5	145.6	147.4	195	138.8
Q64514	Tpp2	PE	Tripeptidyl-peptidase 2 OS=Mus musculus GN=Tpp2 PE=1 SV=3	2.37718	4	4	4	1262	139.791	6.58				0.904	0.877	0.988	0.784	1.533	0.889	0.86	0.984		136.7	105.7	123.6	119.9	102.2	135.1	107.2	117	209.6	118.9
Q02013	Aqp1	PE	Aquaporin-1 OS=Mus musculus GN=Aqp1 PE=1 SV=3	3.34572	1	1	1	269	28.775	7.43				1.228	1.002	0.905	1.936	1.051	0.77	1.367	0.324		100.7	110.2	123.6	100.8	195.5	91.1	194.8	46.3	105.8	143
Q7TN29	Smap2	PE	Stromal membrane-associated protein 2 OS=Mus musculus GN=Smap2 PE=1 SV=1	3.03738	1	1	1	428	46.547	8.87				0.954	1.045	0.926	1.255	0.959	0.919	1.073	1.057		128.9	109	123	134.7	127.3	119.3	161.8	125.5	123.6	118.7
A3KMP2	Ttc38	PE	Tetratricopeptide repeat protein 38 OS=Mus musculus GN=Ttc38 PE=1 SV=2	4.30108	2	2	2	465	52.19	6.3				1.496	1.038	1.599	0.514	3.56	0.956	0.517	0.371		82	131.5	122.8	85.2	71.1	131.2	42.2	51.1	292	137.5
Q09200	B4galnt1	PE	Beta-1,4 N-acetylgalactosaminyltransferase 1 OS=Mus musculus GN=B4galnt1 PE=1 SV=1	8.44278	5	5	5	533	59.175	8.59				1.191	1.339	1.257	0.986	1.705	0.859	2.125	0.865		103.2	111.5	122.8	138.1	275.6	129.6	101.8	112.1	176	129.7
B1AR13	Cisd3	PE	CDGSH iron-sulfur domain-containing protein 3, mitochondrial OS=Mus musculus GN=Cisd3 PE=1 SV=1	9.48905	2	2	2	137	15.666	9.79				0.628	1.545	0.908	1.112	0.631	1.024	4.69	0.977		195.7	176.9	122.8	302.2	810.3	177.6	217.7	168.7	123.5	172.8
P11942	Cd3g	PE	T-cell surface glycoprotein CD3 gamma chain OS=Mus musculus GN=Cd3g PE=1 SV=1	4.94505	1	1	1	182	20.221	8.85				2.465	0.732	1.265	1.501	1.384	0.682	0.946	0.481		49.7	60.4	122.4	36.4	83.8	62.8	74.5	42.6	68.7	88.6
Q99N69	Lpxn	PE	Leupaxin OS=Mus musculus GN=Lpxn PE=1 SV=2	3.88601	2	2	2	386	43.45	6.43				0.809	1.039	0.754	1.096	0.924	0.8	0.785	1.203		150.7	108.7	121.9	156.6	106.8	113.7	165.1	163.6	139.2	136
Q61768	Kif5b	PE	Kinesin-1 heavy chain OS=Mus musculus GN=Kif5b PE=1 SV=3	2.07684	2	3	2	963	109.484	6.44				0.832	0.992	0.849	0.99	1.08	0.808	0.874	0.756		145.9	113.1	121.4	144.7	122.4	123.8	144.4	105.8	157.6	140
P84096	Rhog	PE	Rho-related GTP-binding protein RhoG OS=Mus musculus GN=Rhog PE=1 SV=1	25.1309	4	6	3	191	21.295	8.12				1.329	1.236	1.432	1.09	1.75	0.902	1.386	0.724		91.3	102.7	121.3	112.9	157.9	130.8	99.5	82.5	159.8	113.9
Q8K1I7	Wipf1	PE	WAS/WASL-interacting protein family member 1 OS=Mus musculus GN=Wipf1 PE=1 SV=1	4.25963	2	2	2	493	50.05	11.41				0.986	1.179	1.189	0.77	2.176	1.106	0.797	0.63		123	161.9	121.3	145	116.7	146.3	94.7	92.1	267.6	146.4
Q6P8K8	Cpa4	PE	Carboxypeptidase A4 OS=Mus musculus GN=Cpa4 PE=2 SV=2	3.57143	2	3	2	420	47.309	6.61				0.695	0.876	2.099	0.778	0.69	0.952	1.012	0.946		173.7	170.8	120.8	152.2	181.6	364.7	135.1	169.8	119.9	179.5
Q9JMA1	Usp14	PE	Ubiquitin carboxyl-terminal hydrolase 14 OS=Mus musculus GN=Usp14 PE=1 SV=3	4.0568	2	3	2	493	55.966	5.24				0.893	0.828	0.758	0.85	1.178	1.012	0.724	0.847		135.1	125.5	120.7	111.9	89.8	102.5	114.9	105.1	159.2	124
Q9JJN0	Polh	PE	DNA polymerase eta OS=Mus musculus GN=Polh PE=1 SV=1	2.44957	2	2	2	694	76.119	8.34				0.96	1.359	0.863	1.076	0.739	0.937	0.807	1.104		125.4	101.1	120.3	170.4	87.1	108.2	134.9	119.2	92.6	108
Q8BMD8	Slc25a24	PE	Calcium-binding mitochondrial carrier protein SCaMC-1 OS=Mus musculus GN=Slc25a24 PE=1 SV=1	6.10526	3	4	3	475	52.868	7.43				0.692	1.43	1.057	0.652	0.608	0.968	0.898	0.501		173.1	156.8	119.7	247.5	145.6	183	112.9	81.2	105.2	162.1
Q8R1F0	D8Ertd738e	PE	Leydig cell tumor 10 kDa protein homolog OS=Mus musculus GN=D8Ertd738e PE=3 SV=1	34.0426	4	4	4	94	10.191	11.63				0.784	0.976	1.038	1.557	0.924	0.878	2.892	1.102		152.1	134.9	119.1	148.4	444.7	157.8	236.8	169.4	140.6	153.8
Q8BRN9	Cc2d1b	PE	Coiled-coil and C2 domain-containing protein 1B OS=Mus musculus GN=Cc2d1b PE=1 SV=1	2.83019	3	3	3	848	93.034	5.41				1.038	1.13	1.036	1.086	1.802	0.389	0.351	0.318		114.5	135.6	118.9	129.5	122.4	118.6	124.4	110.7	206.4	348.5
Q9JHF5	Tcirg1	PE	V-type proton ATPase subunit a OS=Mus musculus GN=Tcirg1 PE=1 SV=1	0.959233	1	1	1	834	93.4	6.38				0.656	0.994	0.561	1.028	0.533	0.91	0.417	0.627		181.1	170.6	118.9	180	78.2	101.6	186.2	117.6	96.5	187.5
O88685	Psmc3	PE	26S protease regulatory subunit 6A OS=Mus musculus GN=Psmc3 PE=1 SV=2	4.0724	2	2	2	442	49.518	5.19				1.331	1.217	1.251	1.343	1.713	0.838	0.744	0.844		89.1	99.4	118.6	108.5	88.2	111.5	119.7	100	152.6	118.5
Q61335	Bcap31	PE	B-cell receptor-associated protein 31 OS=Mus musculus GN=Bcap31 PE=1 SV=4	11.0204	3	3	3	245	27.939	8.7				1.005	0.595	1.195	0.654	1.848	1.355	1.047	0.681		117.4	167.4	118	69.9	129.3	140.3	76.8	84.1	217	123.5
Q8CGZ0	Cherp	PE	Calcium homeostasis endoplasmic reticulum protein OS=Mus musculus GN=Cherp PE=1 SV=1	1.92308	2	2	2	936	106.102	9.14				0.897	1.233	0.848	1.066	0.954	0.891	0.78	1.097		130.4	108.5	117	160.8	95	110.7	139	133.5	124.4	121.7
Q9R0Q3	Tmed2	PE	Transmembrane emp24 domain-containing protein 2 OS=Mus musculus GN=Tmed2 PE=1 SV=1	10.4478	2	3	2	201	22.69	5.17				1.212	0.714	1.411	0.875	1.829	1.44	0.928	0.888		96.3	122	116.8	68.7	78.6	135.9	84.3	75.2	176.2	84.7
P97742	Cpt1a	PE	Carnitine O-palmitoyltransferase 1, liver isoform OS=Mus musculus GN=Cpt1a PE=1 SV=4	5.69211	6	6	6	773	88.195	8.62				0.785	0.802	0.842	0.751	0.994	0.988	2.611	0.981		148.7	145.3	116.8	119.3	383.9	125.2	111.7	144.2	147.9	147
Q9CYG7	Tomm34	PE	Mitochondrial import receptor subunit TOM34 OS=Mus musculus GN=Tomm34 PE=1 SV=1	10.356	3	3	3	309	34.257	9.14				1.433	1.35	1.681	0.555	2.621	1.471	1.045	0.5		81.5	195.6	116.8	110	139	137	45.3	66.5	213.6	133
P97807	Fh	PE	Fumarate hydratase, mitochondrial OS=Mus musculus GN=Fh PE=1 SV=3	6.70611	3	3	3	507	54.322	9.04				1.163	1.549	0.822	1.12	1.329	0.854	0.535	0.714		100.2	121.5	116.5	155.1	76.2	82.3	112.2	101.6	133.1	142.4
P48377	Rfx1	PE	MHC class II regulatory factor RFX1 OS=Mus musculus GN=Rfx1 PE=1 SV=2	2.07684	2	2	2	963	103.642	6.34				1.141	1.149	0.949	1.221	1.319	0.742	0.632	0.925		101.6	85	116	116.7	72.4	96.4	124.1	105.9	134	114.6
Q62241	Snrpc	PE	U1 small nuclear ribonucleoprotein C OS=Mus musculus GN=Snrpc PE=1 SV=1	5.66038	1	1	1	159	17.351	9.67				1.792	0.781	1.659	1.225	3.013	0.917	0.911	0.887		64.7	102.7	116	50.6	101.9	107.3	79.3	99.3	195	111.9
E9Q394	Akap13	PE	A-kinase anchor protein 13 OS=Mus musculus GN=Akap13 PE=1 SV=1	1.29683	4	4	4	2776	303.786	5.38				0.802	1.748	1.128	0.917	1.293	1.06	1.081	1.162		144.2	143.6	115.6	252	146.4	162.7	132.3	157.4	186.4	135.4
Q8BVI4	Qdpr	PE	Dihydropteridine reductase OS=Mus musculus GN=Qdpr PE=1 SV=2	9.54357	2	3	2	241	25.554	7.81				1.979	1.585	2.207	0.862	3.638	1.159	1.099	0.602		58.4	98	115.6	92.6	92.9	128.9	50.3	50.9	212.5	84.5
Q9Z0H4	Celf2	PE	CUGBP Elav-like family member 2 OS=Mus musculus GN=Celf2 PE=1 SV=1	4.52756	3	3	3	508	54.236	8.76				1.221	1.024	1.18	0.691	2.649	1.034	0.585	0.378		94.2	147.5	115	96.5	83.5	111.1	65.1	53.8	249.6	142.6
Q9QXV1	Cbx8	PE	Chromobox protein homolog 8 OS=Mus musculus GN=Cbx8 PE=1 SV=1	7.45856	3	3	3	362	39.836	9.94				0.889	1.514	1.032	0.905	0.841	0.873	2.952	0.751		129.2	137.3	114.9	195.7	464.4	133.4	116.9	118.2	108.6	157.3
P24063	Itgal	PE	Integrin alpha-L OS=Mus musculus GN=Itgal PE=1 SV=2	2.2356	3	3	3	1163	128.247	6.11				1.5	1.363	1.388	1.091	1.723	1.045	1.122	0.926		76.2	99.2	114.2	103.8	106.5	105.7	83.1	87.9	131.3	94.9
Q8C0I4	Epc2	PE	Enhancer of polycomb homolog 2 OS=Mus musculus GN=Epc2 PE=2 SV=2	1.11386	1	1	1	808	90.903	8.73				1.047	1.011	0.864	0.999	1.031	0.892	0.677	1.331		109	89	114.1	110.2	67.6	94.1	108.9	132.8	112.3	99.8
Q9ERS2	Ndufa13	PE	NADH dehydrogenase [ubiquinone] 1 alpha subcomplex subunit 13 OS=Mus musculus GN=Ndufa13 PE=1 SV=3	13.1944	2	2	2	144	16.849	9.48				0.94	1.065	1.069	1.29	1.061	0.939	1.295	0.754		121.2	122.1	114	129	168.4	129.6	156.4	98	128.6	130
Q9D0I8	Mrto4	PE	mRNA turnover protein 4 homolog OS=Mus musculus GN=Mrto4 PE=1 SV=1	3.76569	1	1	1	239	27.528	8.54				1.469	1.056	1.318	1.118	1.674	1.093	0.962	0.828		77.6	118.2	114	82	104	102.2	86.7	89.5	129.9	108.1
Q9D7B6	Acad8	PE	Isobutyryl-CoA dehydrogenase, mitochondrial OS=Mus musculus GN=Acad8 PE=1 SV=2	2.17918	1	1	1	413	44.99	8.13				1.302	1.237	1.128	0.945	1.494	1.158	1.036	1.267		87.4	90	113.8	108.1	80.5	98.5	82.5	98.5	130.6	77.7
Q640M1	Utp14a	PE	U3 small nucleolar RNA-associated protein 14 homolog A OS=Mus musculus GN=Utp14a PE=1 SV=1	4.1721	3	3	3	767	87.212	9.2				1.073	1.064	1.02	1.476	1.051	0.779	3.203	1.053		105.3	93.3	113.1	112.1	383.8	107.5	155.5	126.1	110.7	119.8
Q3UQA7	Selenoh	PE	Selenoprotein H OS=Mus musculus GN=Selenoh PE=1 SV=2	17.2414	2	2	2	116	12.967	9.8				1.045	1.253	1.473	1.444	1.37	0.538	1.405	0.507		108.2	126	113.1	135.6	329.1	159.5	156.3	118.7	148.3	234.2
Q922Q8	Lrrc59	PE	Leucine-rich repeat-containing protein 59 OS=Mus musculus GN=Lrrc59 PE=1 SV=1	13.355	5	5	5	307	34.856	9.52				0.821	1.081	1.115	0.972	1.344	0.773	1.255	0.786		137.7	131.4	113	148.9	213.3	153.6	133.8	133.6	185.1	170
Q9D2V7	Coro7	PE	Coronin-7 OS=Mus musculus GN=Coro7 PE=1 SV=2	3.47072	3	4	3	922	100.749	5.77				1.076	1.025	1.034	0.897	1.433	0.84	0.943	0.785		104.8	104.3	112.8	107.5	117	108.3	94	97.4	150.3	124.1
Q99P72	Rtn4	PE	Reticulon-4 OS=Mus musculus GN=Rtn4 PE=1 SV=2	1.37694	2	2	2	1162	126.535	4.54				0.667	1.056	1.439	0.995	0.788	0.687	0.576	1.338		169.1	102.2	112.8	178.5	85.7	243.3	168.2	198.9	133.2	148.6
Q9DCJ1	Mlst8	PE	Target of rapamycin complex subunit LST8 OS=Mus musculus GN=Mlst8 PE=1 SV=1	5.82822	2	2	2	326	35.828	5.86				0.816	0.88	1.146	0.499	0.533	0.929	0.686	0.645		138.3	119.8	112.8	121.7	88.4	158.4	69	83.1	73.7	128.9
Q61102	Abcb7	PE	ATP-binding cassette sub-family B member 7, mitochondrial OS=Mus musculus GN=Abcb7 PE=1 SV=3	1.8617	2	2	2	752	82.529	9.32				0.797	0.94	1.254	1.033	1.263	0.879	0.722	0.737		141.1	117.3	112.4	132.7	96.4	177	145.7	98.5	178.2	133.5
Q9D7S7	Rpl22l1	PE	60S ribosomal protein L22-like 1 OS=Mus musculus GN=Rpl22l1 PE=1 SV=1	15.5738	2	3	2	122	14.459	9.45				0.793	0.99	0.872	1.45	0.994	0.238	1.162	0.303		141.6	109	112.3	140.1	532.1	123.5	205.3	139	140.8	458
Q62348	Tsn	PE	Translin OS=Mus musculus GN=Tsn PE=1 SV=1	11.4035	3	3	3	228	26.185	6.44				1.134	0.938	1.214	0.79	1.683	1.192	1.797	0.721		98.9	123.8	112.1	92.8	186.5	120	78.2	74.8	166.4	103.8
Q8R1L4	Kdelr3	PE	ER lumen protein-retaining receptor 3 OS=Mus musculus GN=Kdelr3 PE=1 SV=1	3.73832	1	2	1	214	25.094	9.06				0.864	1.272	1.117	0.656	0.832	0.66	0.749	0.486		129.2	107.6	111.7	164.4	122	144.2	84.8	79.3	107.5	163
P34022	Ranbp1	PE	Ran-specific GTPase-activating protein OS=Mus musculus GN=Ranbp1 PE=1 SV=2	14.2857	3	3	3	203	23.582	5.22				0.766	1.32	1.144	0.788	0.717	0.699	0.609	0.424		144.8	127.4	111	191.2	111	165.7	114.1	77.3	103.9	182.3
Q9R0Q7	Ptges3	PE	Prostaglandin E synthase 3 OS=Mus musculus GN=Ptges3 PE=1 SV=1	10.625	2	2	2	160	18.709	4.55				0.911	0.553	0.936	0.451	1.79	0.237	0.154	0.152		121.7	128.2	110.9	67.4	83.4	113.9	54.9	82.4	218	540.4
Q99LS3	Psph	PE	Phosphoserine phosphatase OS=Mus musculus GN=Psph PE=1 SV=1	8.88889	2	3	2	225	25.08	6.14				0.898	0.92	0.85	0.714	1.112	0.998	0.542	0.565		123.3	118.8	110.8	113.4	64.5	104.8	88.1	67.2	137.1	119
O55106	Strn	PE	Striatin OS=Mus musculus GN=Strn PE=1 SV=2	2.69231	2	2	2	780	85.913	5.27				0.757	1.04	0.743	1.224	0.745	0.696	0.677	0.853		146.3	95.8	110.8	152.1	93.2	108.6	179.1	117.4	109	137.7
Q9CZ30	Ola1	PE	Obg-like ATPase 1 OS=Mus musculus GN=Ola1 PE=1 SV=1	6.31313	3	3	3	396	44.701	7.81				1.09	1.275	1.385	0.829	2.392	1.025	0.748	0.472		101.6	153.7	110.7	129.5	112.1	140.6	84.2	70.8	242.9	149.9
Q8VE70	Pdcd10	PE	Programmed cell death protein 10 OS=Mus musculus GN=Pdcd10 PE=1 SV=1	9.43396	2	2	2	212	24.7	8.19				1.058	0.883	1.087	0.674	1.729	1.065	0.613	0.505		104.5	124.9	110.6	92.2	71.9	113.5	70.5	59.2	180.7	117.2
P56382	Atp5e	PE	ATP synthase subunit epsilon, mitochondrial OS=Mus musculus GN=Atp5e PE=1 SV=2	15.3846	1	1	1	52	5.834	10.01				1.139	1.358	1.555	1.078	1.919	1.122	1.271	0.483		97.1	129.9	110.6	131.9	147.2	151	104.6	56	186.4	115.8
P62869	Elob	PE	Elongin-B OS=Mus musculus GN=Elob PE=1 SV=1	6.77966	1	1	1	118	13.162	5.01				1.366	1.259	1.343	1.255	1.813	0.954	0.757	0.797		80.9	114.9	110.5	101.9	91.1	108.7	101.5	95.9	146.8	120.3
Q9WUM4	Coro1c	PE	Coronin-1C OS=Mus musculus GN=Coro1c PE=1 SV=2	6.32911	3	4	2	474	53.087	7.08				0.62	0.685	0.642	0.761	0.485	0.651	0.69	0.645		177.2	107	109.9	121.3	113.4	113.7	134.9	105.9	85.9	164.4
P61226	Rap2b	PE	Ras-related protein Rap-2b OS=Mus musculus GN=Rap2b PE=1 SV=1	6.01093	1	1	1	183	20.491	4.81				0.804	1.108	0.9	0.732	0.826	0.836	0.681	0.739		136.4	99.5	109.6	151.1	81.1	122.8	99.8	88	112.6	119.1
Q8K1X4	Nckap1l	PE	Nck-associated protein 1-like OS=Mus musculus GN=Nckap1l PE=1 SV=1	2.1164	3	3	3	1134	128.822	6.64				1.245	1.536	1.45	1.287	1.859	0.976	0.877	0.826		88	122.8	109.5	135.1	110.4	127.6	113.2	103.9	163.6	125.8
Q9D6M3	Slc25a22	PE	Mitochondrial glutamate carrier 1 OS=Mus musculus GN=Slc25a22 PE=1 SV=1	4.95356	2	3	2	323	34.648	9.09				0.676	0.888	0.844	0.753	0.808	1.118	2.627	1.027		160.6	125.9	108.5	142.5	296	135.6	121	115.7	129.8	112.7
Q9CXT8	Pmpcb	PE	Mitochondrial-processing peptidase subunit beta OS=Mus musculus GN=Pmpcb PE=1 SV=1	4.70348	2	2	2	489	54.58	6.99				1.035	1.379	1.182	1.096	1.213	0.723	0.663	0.929		104.6	98.2	108.3	144.3	90.1	123.7	114.6	126.2	127	135.9
Q6PHP4	Zfp512b	PE	MCG140111, isoform CRA_c (Fragment) OS=Mus musculus GN=Zfp512b PE=1 SV=1	4.20933	4	4	4	879	96.185	9.83				1.157	0.96	1.106	1.243	1.149	0.934	4.333	0.834		93.4	104	108	89.7	482.4	103.3	116.1	92.8	107.3	111.3
Q8CIM8	Ints4	PE	Integrator complex subunit 4 OS=Mus musculus GN=Ints4 PE=1 SV=1	2.80083	3	3	3	964	108.124	6.42				0.729	0.997	0.58	0.881	0.553	1.082	0.487	0.703		148	156.6	108	147.6	70.4	85.8	130.4	101.7	81.8	144.7
E9QAE3	Btaf1	PE	B-TFIID TATA-box-binding protein-associated factor 1 OS=Mus musculus GN=Btaf1 PE=1 SV=1	1.67749	3	3	3	1848	206.92	6.43				0.675	1.134	0.839	0.659	0.465	0.921	0.668	0.663		159.1	120.6	107.4	180.5	87.5	133.5	104.9	86.9	73.9	131
O35459	Ech1	PE	Delta(3,5)-Delta(2,4)-dienoyl-CoA isomerase, mitochondrial OS=Mus musculus GN=Ech1 PE=1 SV=1	5.50459	2	2	2	327	36.095	7.71				0.814	1.293	1.247	0.371	0.654	0.805	0.653	0.478		131.7	118.3	107.3	170.2	95.9	164.2	48.8	70.3	86.1	146.9
A2ACQ1	Dhx35	PE	DEAH (Asp-Glu-Ala-His) box polypeptide 35 OS=Mus musculus GN=Dhx35 PE=1 SV=1	1.13798	1	1	1	703	78.69	8.35				1.077	1.149	0.915	1.184	1.114	0.937	0.835	1.026		99.6	92	107.3	114.5	82	91.1	118	100.7	110.9	98.2
P16332	Mut	PE	Methylmalonyl-CoA mutase, mitochondrial OS=Mus musculus GN=Mut PE=1 SV=2	1.06952	1	1	1	748	82.792	6.89				0.699	0.951	0.854	1.296	1.08	0.668	0.638	1.008		153.6	107.5	107.3	146.1	102.6	131.2	199	162.2	165.9	160.8
REFSEQ:XP_001252647			(Bos taurus) similar to endopin 2B	11.0312	6	7	1	417	46.868	5.66		Y	Y	0.779	1.141	0.941	1.091	0.798	0.857	0.85	0.872		137.5	118	107.2	157	117	129.4	150.1	120.1	109.8	137.7
Q922Q1	Marc2	PE	Mitochondrial amidoxime reducing component 2 OS=Mus musculus GN=Marc2 PE=1 SV=1	5.02959	2	2	2	338	38.17	8.68				1.852	1.066	1.155	1.071	1.805	0.743	2.716	0.736		57.9	54.8	107.2	61.7	200.3	66.9	62	54.3	104.5	73.8
P28352	Apex1	PE	DNA-(apurinic or apyrimidinic site) lyase OS=Mus musculus GN=Apex1 PE=1 SV=2	12.9338	3	5	3	317	35.468	7.91				1.346	0.933	1.298	0.738	2.377	0.726	0.525	0.474		79.5	101.8	107	74.2	73.6	103.2	58.6	66.4	189	140.2
D3Z694	Gm4799	PE	Uncharacterized protein OS=Mus musculus GN=Gm4799 PE=4 SV=1	7.79817	2	2	2	218	21.979	6.15				0.652	1.163	0.847	0.942	0.516	0.924	0.88	0.727		163.3	141.9	106.4	190	135.2	138.4	153.8	111.6	84.3	153.5
P11679	Krt8	PE	Keratin, type II cytoskeletal 8 OS=Mus musculus GN=Krt8 PE=1 SV=4	14.0816	13	45	4	490	54.531	5.82		Y	Y	2.993	4.674	1.589	1.377	0.62	0.93	8.216	0.776		35.5	20	106.2	165.8	176.8	56.4	48.9	16.7	22	21.5
P60229	Eif3e	PE	Eukaryotic translation initiation factor 3 subunit E OS=Mus musculus GN=Eif3e PE=1 SV=1	9.88764	4	4	4	445	52.187	6.04				1.124	0.97	0.967	1.129	1.387	0.971	0.615	0.593		94.4	111.1	106.2	91.6	70.4	91.3	106.6	67.9	131	114.5
Q8JZN5	Acad9	PE	Acyl-CoA dehydrogenase family member 9, mitochondrial OS=Mus musculus GN=Acad9 PE=1 SV=2	2.88	2	2	2	625	68.679	7.46				1.019	1.503	1.551	1.18	1.42	0.87	0.689	0.898		104.1	107.2	106.1	156.5	84.9	161.5	122.9	110.7	147.9	123.2
P50580	Pa2g4	PE	Proliferation-associated protein 2G4 OS=Mus musculus GN=Pa2g4 PE=1 SV=3	11.6751	4	4	4	394	43.671	6.86				1.114	1.063	1.159	0.882	1.822	1.255	0.75	0.86		94.1	122.4	104.9	100.1	73.1	109.1	83	83.9	171.5	97.5
Q9CPY4	Cdk2ap2	PE	Cyclin-dependent kinase 2-associated protein 2 OS=Mus musculus GN=Cdk2ap2 PE=1 SV=1	7.87402	1	1	1	127	13.194	9.48				0.879	0.857	0.776	0.911	0.818	0.701	0.857	0.986		119.3	67.6	104.9	102.2	82.6	92.5	108.7	95	97.6	96.4
P35564	Canx	PE	Calnexin OS=Mus musculus GN=Canx PE=1 SV=1	4.56853	3	3	3	591	67.236	4.64				1.255	1.157	1.158	0.814	2.122	0.914	0.55	0.622		83.3	107.4	104.5	96.4	64.6	96.5	67.8	73.1	176.8	117.5
Q9CQT1	Mri1	PE	Methylthioribose-1-phosphate isomerase OS=Mus musculus GN=Mri1 PE=1 SV=1	7.31707	2	2	2	369	39.386	5.91				0.966	0.799	0.745	0.849	0.963	0.908	0.669	1.059		108.3	90.3	104.5	86.5	66.5	80.7	91.9	105.2	104.3	99.4
Q8VHN8	Nudt16l1	PE	Protein syndesmos OS=Mus musculus GN=Nudt16l1 PE=1 SV=2	4.73934	1	1	1	211	23.399	9.26				0.974	1.102	0.751	0.911	1	0.772	0.696	0.734		106.9	103.7	104.1	117.9	93.6	80.3	97.4	98.6	106.9	134.4
Q3UFY0	Rrp36	PE	Ribosomal RNA processing protein 36 homolog OS=Mus musculus GN=Rrp36 PE=1 SV=1	2.86885	1	1	1	244	28.571	10.56				1.114	1.077	1.057	2.997	1.473	0.996	1.784	1.313		93.4	105.1	104.1	100.7	188.2	98.8	280	138.6	137.6	105.5
Q3TIV5	Zc3h15	PE	Zinc finger CCCH domain-containing protein 15 OS=Mus musculus GN=Zc3h15 PE=1 SV=2	5.39906	3	3	3	426	48.297	5.3				1.632	1.815	1.848	1.431	2.84	1.078	2.059	1.069		63.7	104.8	104	115.7	200.1	117.8	91.2	103.9	181.1	97.2
O08734	Bak1	PE	Bcl-2 homologous antagonist/killer OS=Mus musculus GN=Bak1 PE=1 SV=3	7.17703	2	2	2	209	23.28	6.18				1.219	1.457	0.935	0.71	1.313	0.633	0.549	0.532		85.3	70.1	104	124.2	60.9	79.7	60.6	58.9	111.9	110.8
Q99JT2	Stk26	PE	Serine/threonine-protein kinase 26 OS=Mus musculus GN=Stk26 PE=1 SV=1	5.76923	3	4	1	416	46.585	5.24				1.96	1.009	1.563	0.844	2.863	0.856	0.504	0.43		53	79.5	103.9	53.4	46.8	82.8	44.7	40	151.7	92.9
Q3UZ39	Lrrfip1	PE	Leucine-rich repeat flightless-interacting protein 1 OS=Mus musculus GN=Lrrfip1 PE=1 SV=2	3.7037	3	3	3	729	79.201	4.82				0.869	1.094	1.218	0.635	0.903	1.145	0.983	0.697		119.5	117.3	103.9	130.8	100.7	145.6	75.9	71.5	108	102.5
Q8C050	Rps6ka5	PE	Ribosomal protein S6 kinase alpha-5 OS=Mus musculus GN=Rps6ka5 PE=1 SV=2	1.854	2	2	2	863	96.523	7.34				0.949	1.148	1.098	1.077	1.326	0.689	0.906	0.802		109.3	93.8	103.7	125.4	123.3	119.9	117.7	109.2	144.8	136.1
Q9Z0L8	Ggh	PE	Gamma-glutamyl hydrolase OS=Mus musculus GN=Ggh PE=1 SV=2	4.4164	2	2	2	317	35.447	7.5				0.64	0.77	1.405	0.743	0.815	0.775	0.874	0.951		162	111.7	103.6	124.7	125.9	227.6	120.3	137.1	132	144.1
O88622	Parg	PE	Poly(ADP-ribose) glycohydrolase OS=Mus musculus GN=Parg PE=1 SV=2	2.16718	2	2	2	969	109.255	6.9				1.042	1.1	0.927	1.047	1.292	0.941	0.719	0.972		99.4	94.5	103.6	109.3	72.2	92.1	104.1	97.7	128.4	100.4
Q9Z1A1	Tfg	PE	Putative uncharacterized protein OS=Mus musculus GN=Tfg PE=1 SV=1	3.52645	2	2	2	397	42.994	5.1				1.125	0.699	1.328	0.687	1.625	1.422	1.285	1.066		91.9	161.2	103.4	64.3	145.7	122	63.1	120.8	149.3	113.4
Q00612	G6pdx	PE	Glucose-6-phosphate 1-dehydrogenase X OS=Mus musculus GN=G6pdx PE=1 SV=3	5.24272	2	2	2	515	59.225	6.49				1.417	1.39	1.926	2.197	1.862	1.032	0.85	0.884		73	95.8	103.4	101.4	79	140.5	160.3	82.1	135.8	92.9
P22892	Ap1g1	PE	AP-1 complex subunit gamma-1 OS=Mus musculus GN=Ap1g1 PE=1 SV=3	2.18978	2	2	2	822	91.292	6.8				1.224	0.96	1.183	0.933	1.909	0.828	0.576	0.511		84.4	97.5	103.3	81	67.8	99.8	78.7	60.2	161.1	117.7
Q4V9W2	Srek1ip1	PE	Protein SREK1IP1 OS=Mus musculus GN=Srek1ip1 PE=1 SV=1	4.57516	1	1	1	153	18.14	9.91				0.676	0.94	0.86	0.967	0.727	0.932	0.857	1.21		152.8	123.1	103.3	143.6	113.2	131.4	147.8	159.8	111.1	132.1
Q11011	Npepps	PE	Puromycin-sensitive aminopeptidase OS=Mus musculus GN=Npepps PE=1 SV=2	3.36957	3	3	3	920	103.26	5.9				1.132	0.96	1.287	0.943	1.814	0.89	0.726	0.709		91.2	98	103.2	87.6	80	117.4	86	78.1	165.5	110.1
Q9Z2D6	Mecp2	PE	Methyl-CpG-binding protein 2 OS=Mus musculus GN=Mecp2 PE=1 SV=1	6.19835	3	3	3	484	52.275	9.96				1.051	1.37	1.624	1.263	1.223	0.76	2.334	1.192		97.9	83.2	102.9	134	255.6	159	123.6	130.6	119.7	109.5
Q6P1D7	Slx4	PE	Structure-specific endonuclease subunit SLX4 OS=Mus musculus GN=Slx4 PE=1 SV=1	1.98083	4	4	4	1565	172.305	5.5				0.808	1.415	0.903	1.753	1.073	0.783	0.693	1.439		127.3	90.2	102.9	180.1	79.8	115	223.2	165.7	136.5	115.2
Q9DCC8	Tomm20	PE	Mitochondrial import receptor subunit TOM20 homolog OS=Mus musculus GN=Tomm20 PE=1 SV=1	17.2414	3	3	3	145	16.274	8.6				0.809	0.8	1.247	1.442	1.224	0.832	6.918	0.868		127	118.8	102.8	101.6	988.1	158.4	183.1	123.9	155.4	142.8
Q6PFF0	Scaf4	PE	SR-related CTD-associated factor 4 OS=Mus musculus GN=Scaf4 PE=1 SV=1	1.73697	3	3	3	1209	131.6	9.6				1.291	1.318	1.177	0.883	2.627	0.996	0.976	0.799		79.6	94.1	102.8	104.9	92.3	93.6	70.3	75.5	209	94.5
P49722	Psma2	PE	Proteasome subunit alpha type-2 OS=Mus musculus GN=Psma2 PE=1 SV=3	20.9402	3	3	3	234	25.91	7.43				1.296	0.921	1.031	1.18	1.057	0.829	1.135	0.896		79.2	73.6	102.6	72.9	100.8	81.6	93.4	79.6	83.6	88.8
Q99P88	Nup155	PE	Nuclear pore complex protein Nup155 OS=Mus musculus GN=Nup155 PE=1 SV=1	3.0913	3	3	3	1391	155.019	6.15				0.68	0.819	0.781	0.855	0.804	0.904	0.609	0.906		150.8	118.5	102.5	123.4	79.8	117.7	128.9	118.9	121.2	131.1
P52825	Cpt2	PE	Carnitine O-palmitoyltransferase 2, mitochondrial OS=Mus musculus GN=Cpt2 PE=1 SV=2	1.06383	1	1	1	658	73.934	8.37				0.894	1.358	1.109	0.889	1.289	0.784	0.843	0.837		114.6	87.6	102.5	155.7	94.2	127.1	101.9	93.5	147.8	111.8
O35892	Sp100	PE	Nuclear autoantigen Sp-100 OS=Mus musculus GN=Sp100 PE=1 SV=2	1.45228	1	1	1	482	54.692	8.66				1.039	0.956	1.339	2.15	1.252	0.389	1.084	0.582		98.5	63.7	102.3	94.1	177.2	131.9	211.8	95.2	123.4	163.5
Q0VGB7	Ppp4r2	PE	Serine/threonine-protein phosphatase 4 regulatory subunit 2 OS=Mus musculus GN=Ppp4r2 PE=1 SV=1	5.03597	2	2	2	417	46.45	4.56				0.831	0.863	0.819	1.219	1.061	0.753	0.69	0.928		123.2	98.5	102.3	106.3	90.3	100.9	150.2	121.3	130.7	130.8
Q99LB2	Dhrs4	PE	Dehydrogenase/reductase SDR family member 4 OS=Mus musculus GN=Dhrs4 PE=1 SV=3	2.86738	1	1	1	279	29.866	9.38				0.711	0.958	0.803	1.195	1.1	0.695	0.518	0.948		143.8	93.2	102.2	137.8	69.5	115.5	171.9	127.2	158.2	134.2
Q9D4H1	Exoc2	PE	Exocyst complex component 2 OS=Mus musculus GN=Exoc2 PE=1 SV=1	0.865801	1	1	1	924	103.894	7.18				0.626	0.85	0.651	0.609	0.502	0.978	0.399	0.649		162.8	110.3	101.9	138.4	45	105.9	99.1	73.2	81.6	112.8
Q8C5N3	Cwc22	PE	Pre-mRNA-splicing factor CWC22 homolog OS=Mus musculus GN=Cwc22 PE=1 SV=1	1.65198	2	2	2	908	104.709	8.09				1.13	1.591	1.38	1.152	1.506	1.132	1.01	1.487		89.7	103.7	101.4	142.7	92.6	123.7	103.3	136.3	135.1	91.7
Q91VT4	Cbr4	PE	Carbonyl reductase family member 4 OS=Mus musculus GN=Cbr4 PE=1 SV=2	10.1695	2	3	2	236	25.398	9.69				0.897	1.362	1.042	1.313	0.814	0.802	0.966	0.862		112.8	108	101.2	153.6	130.1	117.5	148.1	116.1	91.8	134.7
P84099	Rpl19	PE	60S ribosomal protein L19 OS=Mus musculus GN=Rpl19 PE=1 SV=1	8.67347	2	2	2	196	23.451	11.47				1.345	1.064	1.575	0.799	1.068	1.68	1.32	0.805		75	139.4	100.9	79.8	109.5	118.2	60	66.8	80.1	83
Q9Z1P6	Ndufa7	PE	NADH dehydrogenase [ubiquinone] 1 alpha subcomplex subunit 7 OS=Mus musculus GN=Ndufa7 PE=1 SV=3	30.0885	3	3	3	113	12.568	10.17				0.788	0.893	0.945	1.05	0.801	0.893	1.878	0.899		127.6	92	100.6	113.9	193.5	120.6	134	92.6	102.2	103
Q80XU3	Nucks1	PE	Nuclear ubiquitous casein and cyclin-dependent kinase substrate 1 OS=Mus musculus GN=Nucks1 PE=1 SV=1	3.84615	1	2	1	234	26.298	5.14				1.327	2.415	1.599	1.356	2.506	1.45	1.522	0.951		75.7	159.4	100.4	182.8	167.3	121	102.6	104.6	189.7	109.9
P42669	Pura	PE	Transcriptional activator protein Pur-alpha OS=Mus musculus GN=Pura PE=1 SV=1	5.60748	2	2	2	321	34.862	6.44				1.268	1.148	1.392	1.038	1.61	1.119	0.877	0.791		79	99.9	100.2	90.7	78.3	110	82	70.6	127.3	89.2
Q6ZQH8	Nup188	PE	Nucleoporin NUP188 homolog OS=Mus musculus GN=Nup188 PE=1 SV=2	0.397953	1	2	1	1759	196.57	7.01				0.773	0.86	0.796	0.729	0.756	0.777	0.668	0.677		129.4	91.6	100	111.3	78.7	103	94.2	79.8	97.8	117.9
Q9D0L7	Armc10	PE	Armadillo repeat-containing protein 10 OS=Mus musculus GN=Armc10 PE=1 SV=1	12.7451	3	3	3	306	33.29	7.99				1.242	1.227	1.195	1.038	1.809	0.803	1.449	0.741		80.4	78.3	99.9	98.6	141.5	96.1	83.5	72.3	145.5	97.6
A6H611	Mipep	PE	Mitochondrial intermediate peptidase OS=Mus musculus GN=Mipep PE=1 SV=1	0.984529	1	1	1	711	80.8	7.15				0.853	1.203	0.898	1.231	1.008	0.867	0.676	0.812		117.1	105.8	99.9	140.9	82.6	105.1	144.1	99	118	122.1
P85094	Isoc2a	PE	Isochorismatase domain-containing protein 2A OS=Mus musculus GN=Isoc2a PE=1 SV=1	11.6505	2	2	2	206	22.403	8.02				0.726	1.253	0.826	0.832	0.936	1.129	0.658	0.898		137	142	99.5	171.7	82.7	113.1	114	113	128.3	125.7
Q6ZQ73	Cand2	PE	Cullin-associated NEDD8-dissociated protein 2 OS=Mus musculus GN=Cand2 PE=1 SV=2	7.69231	9	13	6	1235	135.546	5.58				0.968	1.326	1.413	0.636	0.694	1.103	0.715	1.548		102.1	118.3	98.8	135.3	76.6	144.2	64.9	165.9	70.9	107.2
Q8BL66	Eea1	PE	Early endosome antigen 1 OS=Mus musculus GN=Eea1 PE=1 SV=2	2.97661	4	4	4	1411	160.817	5.77				0.617	0.853	0.639	0.623	0.458	0.718	1.349	1.018		159.6	79.1	98.5	136.2	148.6	102	99.4	112.2	73.1	110.2
Q8BGS7	Cept1	PE	Choline/ethanolaminephosphotransferase 1 OS=Mus musculus GN=Cept1 PE=1 SV=1	2.64423	1	3	1	416	46.404	8.1				0.611	0.765	0.615	0.71	0.607	0.94	0.751	0.966		161.2	121.5	98.5	123.4	97.1	99.1	114.4	125	97.8	129.3
P27612	Plaa	PE	Phospholipase A-2-activating protein OS=Mus musculus GN=Plaa PE=1 SV=4	1.00756	1	1	1	794	87.166	6.14				1.02	1.097	1.039	0.805	1.734	0.973	0.568	0.672		96.5	112.2	98.4	105.9	65.5	100.3	77.7	77.5	167.3	115.3
Q9JLJ2	Aldh9a1	PE	4-trimethylaminobutyraldehyde dehydrogenase OS=Mus musculus GN=Aldh9a1 PE=1 SV=1	6.47773	3	3	3	494	53.48	6.98				1.129	1.858	1.399	0.734	1.897	1.125	0.758	0.587		86.9	150.7	98.2	161.5	101.6	121.6	63.8	78.7	164.9	134
Q0P678	Zc3h18	PE	Zinc finger CCCH domain-containing protein 18 OS=Mus musculus GN=Zc3h18 PE=1 SV=1	1.79325	2	2	2	948	105.631	7.8				1.096	1.34	1.154	1.014	1.376	0.875	1.15	0.982		89.6	79.6	98.2	120	104.6	103.3	90.8	89.2	123.2	90.9
Q8IUT8			TREMBL:Q8IUT8 Type I hair keratin 4 - Homo sapiens (Human).	22.9358	9	11	2	436	49.38	5.06		Y	Y	0.926	0.638	1.108	0.589	0.435	4.401	0.613	0.839		106	445.8	98.1	67.6	62.1	117.5	62.5	85	46.1	101.3
Q9JLZ3	Auh	PE	Methylglutaconyl-CoA hydratase, mitochondrial OS=Mus musculus GN=Auh PE=1 SV=1	5.09554	2	2	2	314	33.374	9.51				1	1.929	0.991	0.984	1.174	1.095	0.743	0.729		98	114	98	189.1	77.4	97.2	96.5	75.9	115.1	104.1
Q8BH43	Wasf2	PE	Wiskott-Aldrich syndrome protein family member 2 OS=Mus musculus GN=Wasf2 PE=1 SV=1	3.21932	2	2	2	497	54.04	5.53				0.921	0.845	0.932	0.94	1.193	0.662	0.578	0.837		106.1	78	97.7	89.7	68.1	98.9	99.7	98.7	126.6	117.9
Q8BTV2	Cpsf7	PE	Cleavage and polyadenylation specificity factor subunit 7 OS=Mus musculus GN=Cpsf7 PE=1 SV=2	4.03397	2	2	2	471	51.979	8				1.004	1.039	0.882	1.063	1.56	0.825	0.992	0.925		97.1	91.9	97.5	100.9	110.5	85.6	103.2	103	151.5	111.4
O70172	Pip4k2a	PE	Phosphatidylinositol 5-phosphate 4-kinase type-2 alpha OS=Mus musculus GN=Pip4k2a PE=1 SV=1	6.17284	2	3	2	405	46.122	6.99				1.116	1.063	1.082	1.151	1.243	0.831	0.612	0.84		87.2	90.2	97.4	92.8	66.5	94.4	100.4	91.2	108.4	108.6
Q8R0X7	Sgpl1	PE	Sphingosine-1-phosphate lyase 1 OS=Mus musculus GN=Sgpl1 PE=1 SV=1	3.34507	2	2	2	568	63.636	9.1				1.144	1.158	1.193	1.068	1.824	0.967	2.21	0.951		84.9	91	97.2	98.3	207.8	101.3	90.7	89.5	154.9	94.1
O35691	Pnn	PE	Pinin OS=Mus musculus GN=Pnn PE=1 SV=4	2.48276	2	2	2	725	82.386	7.01				1.169	1.235	1.952	1.195	1.134	1.045	1.745	0.901		83.2	84.7	97.2	102.7	141.5	162.4	99.4	73	94.3	81.1
Q9DBG6	Rpn2	PE	Dolichyl-diphosphooligosaccharide--protein glycosyltransferase subunit 2 OS=Mus musculus GN=Rpn2 PE=1 SV=1	3.01109	2	2	2	631	69.02	5.81				1.386	1.057	1.23	1.366	1.772	1.166	0.867	0.777		69.8	84.5	96.7	73.7	62.8	85.8	95.3	56.3	123.6	72.5
P99027	Rplp2	PE	60S acidic ribosomal protein P2 OS=Mus musculus GN=Rplp2 PE=1 SV=3	10.4348	1	1	1	115	11.644	4.54				1.352	1.252	1.034	1.078	1.1	0.854	0.94	0.817		71.4	67.7	96.5	89.4	74.4	73.8	76.9	64.7	78.5	79.2
Q00899	Yy1	PE	Transcriptional repressor protein YY1 OS=Mus musculus GN=Yy1 PE=1 SV=1	3.38164	2	2	2	414	44.689	6.29				1.136	1.13	0.94	1.254	1.306	0.958	1.058	1.036		84.7	86.7	96.3	95.7	95.7	79.7	106.2	93.8	110.6	90.5
P97313	Prkdc	PE	DNA-dependent protein kinase catalytic subunit OS=Mus musculus GN=Prkdc PE=1 SV=3	0.411822	2	2	2	4128	471.168	7.12				0.994	0.747	1.231	0.563	1.29	1.15	1.142	1.567		96.8	102.8	96.3	72.3	102.1	119.2	54.5	140.1	124.9	89.4
Q8VEJ9	Vps4a	PE	Vacuolar protein sorting-associated protein 4A OS=Mus musculus GN=Vps4a PE=1 SV=1	5.94966	3	3	1	437	48.876	7.8				1.153	1.219	1.557	1.74	1.079	1.09	1.428	0.796		83.4	94.9	96.2	101.6	124.3	129.8	145.2	69.3	90	87.1
Q99MR6	Srrt	PE	Serrate RNA effector molecule homolog OS=Mus musculus GN=Srrt PE=1 SV=1	3.54286	3	3	3	875	100.39	5.97				1.112	1.101	1.156	0.93	1.953	1.039	0.978	0.787		86.5	95.9	96.1	95.2	90.2	100	80.4	72.7	168.9	92.3
P47962	Rpl5	PE	60S ribosomal protein L5 OS=Mus musculus GN=Rpl5 PE=1 SV=3	5.05051	2	5	2	297	34.379	9.77				1.299	1.178	1.343	0.903	1.899	0.806	0.739	0.649		73.8	85.6	95.9	86.9	78.5	99.2	66.7	68.9	140.2	106.2
Q9JIF7	Copb1	PE	Coatomer subunit beta OS=Mus musculus GN=Copb1 PE=1 SV=1	4.09234	3	3	3	953	106.998	6				1.25	1.047	1.274	1.037	1.541	0.878	0.757	0.793		76.6	82	95.8	80.3	70.7	97.6	79.5	74.1	118.1	93.4
Q8VCI0	Plbd1	PE	Phospholipase B-like 1 OS=Mus musculus GN=Plbd1 PE=1 SV=1	4	2	2	2	550	62.958	8.87				0.586	0.536	1.018	0.645	0.553	0.959	1.692	0.982		163	114.9	95.6	87.4	202.8	165.9	105.2	117.7	90.1	119.8
Q8CFQ3	Aqr	PE	Intron-binding protein aquarius OS=Mus musculus GN=Aqr PE=1 SV=2	0.472654	1	1	1	1481	170.185	6.27				1.207	1.623	1.123	1.322	1.32	0.835	1.04	0.91		79.2	70.5	95.6	128.6	87.8	88.9	104.8	76.8	104.6	84.4
Q921V7	Slc44a3	PE	Choline transporter-like protein 3 OS=Mus musculus GN=Slc44a3 PE=2 SV=3	1.37195	1	2	1	656	73.366	7.74				0.889	1.251	1.305	0.591	0.548	1.151	0.951	0.389		107	109.6	95.1	133.8	90.5	139.6	63.2	37.1	58.6	95.2
Q9JHS4	Clpx	PE	ATP-dependent Clp protease ATP-binding subunit clpX-like, mitochondrial OS=Mus musculus GN=Clpx PE=1 SV=2	2.83912	2	2	2	634	69.186	7.71				0.755	1.309	1.438	1.171	0.762	1.087	0.784	0.909		125.9	118.7	95	164.9	85.5	181.1	147.5	99.2	96	109.2
Q9CX00	Ist1	PE	IST1 homolog OS=Mus musculus GN=Ist1 PE=1 SV=1	1.9337	1	1	1	362	39.443	5.44				0.82	2.192	1.168	0.774	1.037	1.549	0.792	0.554		115.9	151.7	95	254.1	77.6	135.3	89.7	54.3	120.2	98
P70302	Stim1	PE	Stromal interaction molecule 1 OS=Mus musculus GN=Stim1 PE=1 SV=2	3.21168	2	2	2	685	77.518	6.54				1.011	1.068	1.158	1.053	1.553	1.154	0.766	1.027		93.9	131.1	94.9	100.3	87	108.7	98.9	116.5	145.8	113.5
P03893	Mtnd2	PE	NADH-ubiquinone oxidoreductase chain 2 OS=Mus musculus GN=Mtnd2 PE=1 SV=2	2.02899	1	1	1	345	38.726	9.92				1.448	1.174	1.121	0.856	1.536	1.024	0.687	1.133		65.5	71.1	94.9	76.9	47.7	73.5	56.1	78.7	100.6	69.5
D3Z3N4	Hnrnph3	PE	Heterogeneous nuclear ribonucleoprotein H3 OS=Mus musculus GN=Hnrnph3 PE=1 SV=1	12.7168	4	4	4	346	36.846	6.87				0.658	0.509	0.367	0.655	0.392	1.605	1.394	1.297		143.1	86.8	94.1	72.8	75.4	52.5	93.7	70.1	56.1	54.1
Q64105	Spr	PE	Sepiapterin reductase OS=Mus musculus GN=Spr PE=1 SV=1	5.36398	2	2	2	261	27.865	5.74				1.38	1.126	1.49	0.562	2.628	1.097	0.551	0.487		68.1	106	94.1	76.7	53.2	101.6	38.3	47	179.1	96.6
Q61584	Fxr1	PE	Fragile X mental retardation syndrome-related protein 1 OS=Mus musculus GN=Fxr1 PE=1 SV=2	1.18168	1	1	1	677	76.175	6.98				1.83	1.042	2.05	1.08	1.942	1.624	1.398	1.534		51.2	92.9	93.7	53.4	80	105	55.3	87.7	99.4	57.2
O70456	Sfn	PE	14-3-3 protein sigma OS=Mus musculus GN=Sfn PE=1 SV=2	16.129	5	11	1	248	27.689	4.78				3.521	0.667	1.29	4.943	0.64	5.757	1.269	1.193		26.6	96.9	93.6	17.7	21.4	34.3	131.3	20.1	17	16.8
Q9D1D4	Tmed10	PE	Transmembrane emp24 domain-containing protein 10 OS=Mus musculus GN=Tmed10 PE=1 SV=1	9.58904	2	2	2	219	24.895	6.7				1.862	0.954	1.366	0.713	2.434	1.108	0.695	0.532		50.3	75.6	93.6	48	47.4	68.7	35.8	36.3	122.4	68.2
P35278	Rab5c	PE	Ras-related protein Rab-5C OS=Mus musculus GN=Rab5c PE=1 SV=2	17.1296	3	3	3	216	23.398	8.41				0.914	1.18	1.185	1.128	1.281	0.859	0.661	0.816		102.2	92	93.5	120.7	70.7	121.2	115.3	87.3	130.9	107
O08788	Dctn1	PE	Dynactin subunit 1 OS=Mus musculus GN=Dctn1 PE=1 SV=3	3.74707	4	4	4	1281	141.588	5.9				0.985	1.523	1.08	1.496	1.304	1.219	1.317	0.959		94.8	109.9	93.4	144.4	118.8	102.4	141.8	86.5	123.6	90.2
O35250	Exoc7	PE	Exocyst complex component 7 OS=Mus musculus GN=Exoc7 PE=1 SV=2	3.87374	3	3	3	697	79.911	6.98				0.597	0.885	0.874	0.681	0.648	0.673	0.726	0.527		156.5	109.2	93.4	138.5	117.8	136.7	106.6	85.5	101.5	162.3
D3YXK1	Samd1	PE	Atherin OS=Mus musculus GN=Samd1 PE=1 SV=1	5.58767	3	3	3	519	54.5	7.47				1.124	1.016	0.985	0.933	1.515	1.264	3.732	1.214		82.9	100.8	93.1	84.1	297.7	81.6	77.3	96.8	125.6	79.8
Q6NZF1	Zc3h11a	PE	Zinc finger CCCH domain-containing protein 11A OS=Mus musculus GN=Zc3h11a PE=1 SV=1	6.06061	4	5	4	792	86.438	8.13				0.877	1.422	1.067	1.049	1.166	0.97	1.063	1.125		106	99	92.9	150.7	108.4	113.1	111.2	114.8	123.6	102
P63242	Eif5a	PE	Eukaryotic translation initiation factor 5A-1 OS=Mus musculus GN=Eif5a PE=1 SV=2	12.987	2	2	2	154	16.821	5.24				1.545	1.545	1.971	1.422	3.192	1.367	0.612	0.543		60	155.2	92.8	92.8	69.4	118.3	85.4	61.6	191.6	113.5
Q62419	Sh3gl1	PE	Endophilin-A2 OS=Mus musculus GN=Sh3gl1 PE=1 SV=1	2.17391	1	1	1	368	41.492	5.72				1.119	1.051	1.012	0.757	1.462	0.917	0.665	0.738		82.7	92.5	92.5	86.9	67.1	83.7	62.6	74.4	120.9	100.9
Q9DBR3	Armc8	PE	Armadillo repeat-containing protein 8 OS=Mus musculus GN=Armc8 PE=1 SV=2	5.64636	3	4	3	673	75.315	6.73				0.949	0.743	0.822	0.411	0.667	0.868	0.498	0.538		97	76.2	92	72.1	43.7	79.7	39.9	47.3	64.7	87.9
P12815	Pdcd6	PE	Programmed cell death protein 6 OS=Mus musculus GN=Pdcd6 PE=1 SV=2	10.4712	2	2	2	191	21.854	5.4				0.824	1.129	1.147	1.02	1.528	1.452	1.406	1.156		111.5	115.5	91.8	125.9	111.8	127.9	113.8	91.9	170.4	79.5
Q9Z1R2	Bag6	PE	Large proline-rich protein BAG6 OS=Mus musculus GN=Bag6 PE=1 SV=1	1.47314	2	2	2	1154	120.962	5.71				0.803	0.834	0.851	0.739	0.921	0.713	0.435	0.538		114.1	114.3	91.6	95.1	69.7	97.1	84.3	86.3	105.1	160.2
Q9D0L8	Rnmt	PE	mRNA cap guanine-N7 methyltransferase OS=Mus musculus GN=Rnmt PE=1 SV=1	6.45161	3	3	3	465	53.258	6.48				0.728	0.966	1.012	0.71	0.934	0.356	0.321	0.418		125.3	103.6	91.3	121.1	93.6	126.8	89	121.9	117	291.5
Q6PDY2	Ado	PE	2-aminoethanethiol dioxygenase OS=Mus musculus GN=Ado PE=1 SV=2	12.8906	3	3	3	256	28.354	5.97				0.9	1.147	0.976	0.934	1.069	0.948	0.919	1.17		101.3	82.4	91.1	116.2	79.9	98.8	94.6	101.6	108.3	86.9
Q99J36	Thumpd1	PE	THUMP domain-containing protein 1 OS=Mus musculus GN=Thumpd1 PE=1 SV=1	4.57143	2	2	2	350	38.861	6.07				1.129	0.969	1.293	0.806	1.868	1.305	0.833	0.707		80.5	116.5	91	78.1	74.3	104.2	64.9	63.2	150.5	89.3
P56960	Exosc10	PE	Exosome component 10 OS=Mus musculus GN=Exosc10 PE=1 SV=2	1.80383	2	2	2	887	100.879	8.29				1.148	0.972	0.931	1.122	1.495	0.908	0.574	0.862		79.2	90	90.9	76.9	56.9	73.7	88.8	85.4	118.3	99.1
Q9Z2D8	Mbd3	PE	Methyl-CpG-binding domain protein 3 OS=Mus musculus GN=Mbd3 PE=1 SV=1	9.82456	2	2	2	285	32.148	5.82				0.794	1.049	0.874	0.96	0.631	1.103	1.084	1.066		114.5	88.4	90.9	120.1	86.8	100.1	109.9	85.4	72.2	80.1
P17665	Cox7c	PE	Cytochrome c oxidase subunit 7C, mitochondrial OS=Mus musculus GN=Cox7c PE=1 SV=1	14.2857	1	1	1	63	7.328	11				1.423	1.244	1.15	0.678	2.067	0.961	0.627	0.727		63.6	100.3	90.5	79.1	65.5	73.1	43.1	75.8	131.5	104.3
Q9CQH3	Ndufb5	PE	NADH dehydrogenase [ubiquinone] 1 beta subcomplex subunit 5, mitochondrial OS=Mus musculus GN=Ndufb5 PE=1 SV=1	7.93651	1	1	1	189	21.696	9.41				0.998	0.945	0.851	1.121	1.202	0.896	0.661	0.744		90.6	82	90.5	85.7	60.5	77.1	101.6	68.1	108.9	91.5
Q8R332	Nup58	PE	Nucleoporin p58/p45 OS=Mus musculus GN=Nup58 PE=1 SV=1	3.40716	2	2	2	587	59.409	9.29				1.213	1.124	1.339	0.854	1.276	1.432	0.817	1.66		74.6	96.9	90.4	83.8	55.3	99.9	63.7	112.3	95.1	67.7
Q3ULJ0	Gpd1l	PE	Glycerol-3-phosphate dehydrogenase 1-like protein OS=Mus musculus GN=Gpd1l PE=1 SV=2	7.69231	3	3	3	351	38.201	6.77				1.129	1.101	1.249	0.834	1.641	0.863	0.606	0.717		79.9	85.7	90.3	88.1	60.1	99.8	66.6	71.2	131.2	99.3
P83870	Phf5a	PE	PHD finger-like domain-containing protein 5A OS=Mus musculus GN=Phf5a PE=1 SV=1	8.18182	2	2	2	110	12.397	8.41				1.129	1.511	1.138	1.162	1.182	0.748	2.074	0.647		79.9	90.3	90.2	120.7	250.5	90.9	92.9	78.2	94.4	120.8
Q9QZ88	Vps29	PE	Vacuolar protein sorting-associated protein 29 OS=Mus musculus GN=Vps29 PE=1 SV=1	4.3956	1	1	1	182	20.483	6.79				0.903	0.798	1.12	0.827	1.724	0.939	0.61	0.657		99.6	107.4	90	79.5	69.8	111.6	82.4	75.1	171.8	114.4
P97311	Mcm6	PE	DNA replication licensing factor MCM6 OS=Mus musculus GN=Mcm6 PE=1 SV=1	4.26309	3	3	3	821	92.809	5.45				1.081	0.941	1.115	0.76	2.144	0.649	0.569	0.653		83.1	73.4	89.8	78.1	64.4	92.6	63.1	73.9	178	113.1
Q8R5A3	Apbb1ip	PE	Amyloid beta A4 precursor protein-binding family B member 1-interacting protein OS=Mus musculus GN=Apbb1ip PE=1 SV=2	3.43284	3	3	3	670	74.272	5.35				0.888	0.686	0.991	1.334	1.509	0.935	0.59	0.625		100.9	100.5	89.7	69.3	63.4	100.1	134.7	67.2	152.4	107.5
P50396	Gdi1	PE	Rab GDP dissociation inhibitor alpha OS=Mus musculus GN=Gdi1 PE=1 SV=3	4.25056	2	2	2	447	50.489	5.08				0.743	1.076	0.788	0.588	1.212	1.318	0.845	0.704		120.6	127.7	89.6	129.8	81.9	95	70.9	68.3	146.1	96.9
Q6P4S8	Ints1	PE	Integrator complex subunit 1 OS=Mus musculus GN=Ints1 PE=1 SV=2	0.95672	2	2	2	2195	245.013	6.28				0.848	1.101	0.922	0.885	0.894	0.693	0.623	0.645		105.6	87.7	89.5	116.3	78.8	97.4	93.5	81.5	94.3	126.5
P28867	Prkcd	PE	Protein kinase C delta type OS=Mus musculus GN=Prkcd PE=1 SV=3	1.18694	1	1	1	674	77.497	7.39				1.191	1.052	1.174	0.949	1.919	0.807	1.431	0.741		75.1	83.9	89.5	79	148.7	88.2	71.3	77	144.2	103.9
Q8C5L3	Cnot2	PE	CCR4-NOT transcription complex subunit 2 OS=Mus musculus GN=Cnot2 PE=1 SV=2	3.51852	2	2	2	540	59.673	7.66				0.755	1.333	1.004	0.706	0.719	0.751	0.813	0.659		118.5	82.9	89.5	158	89.8	119	83.7	72.8	85.3	110.5
A2BH40	Arid1a	PE	AT-rich interactive domain-containing protein 1A OS=Mus musculus GN=Arid1a PE=1 SV=1	1.22646	3	3	2	2283	241.939	6.68				0.783	0.9	0.681	0.951	0.951	0.554	0.369	0.533		114.2	86.8	89.4	102.8	57.8	77.8	108.6	83.4	108.7	156.6
Q8K2Q7	Brox	PE	BRO1 domain-containing protein BROX OS=Mus musculus GN=Brox PE=1 SV=1	1.70316	1	1	1	411	46.172	7.69				1.439	5.312	1.399	1.323	2.146	0.426	0.416	0.604		62.1	60.6	89.3	329.6	59.2	86.8	82.1	85.9	133.2	142.2
Q64310	Surf4	PE	Surfeit locus protein 4 OS=Mus musculus GN=Surf4 PE=1 SV=1	13.3829	3	3	3	269	30.361	7.78				1.116	1.051	1.219	0.75	1.026	0.816	0.505	0.411		79.7	91.6	88.9	83.7	56.7	97.1	59.8	46.2	81.8	112.2
Q62376	Snrnp70	PE	U1 small nuclear ribonucleoprotein 70 kDa OS=Mus musculus GN=Snrnp70 PE=1 SV=2	1.5625	1	1	1	448	51.961	9.94				1.589	1.392	1.536	0.933	1.922	1.386	0.963	0.832		55.7	105	88.6	77.6	72.9	85.6	52	63	107.1	75.8
Q8CI11	Gnl3	PE	Guanine nucleotide-binding protein-like 3 OS=Mus musculus GN=Gnl3 PE=1 SV=2	3.71747	2	2	2	538	60.749	9.11				0.979	1.028	0.978	1.17	1.091	0.821	1.605	1.247		90.2	65.6	88.3	92.7	128.1	88.3	105.5	99.6	98.4	79.8
P16110	Lgals3	PE	Galectin-3 OS=Mus musculus GN=Lgals3 PE=1 SV=3	6.81818	2	2	2	264	27.498	8.38				2.165	1.026	2.101	7.196	1.104	1.843	1.216	0.976		40.7	64.2	88.2	41.8	42.3	85.6	293.1	34	44.9	34.8
P61750	Arf4	PE	ADP-ribosylation factor 4 OS=Mus musculus GN=Arf4 PE=1 SV=2	37.2222	5	6	3	180	20.384	7.14				1.06	1.314	1.391	0.937	1.464	1.059	1.401	0.741		83.2	101.6	88.1	109.3	134.4	115.7	77.9	71.1	121.8	96
Q922H2	Pdk3	PE	[Pyruvate dehydrogenase (acetyl-transferring)] kinase isozyme 3, mitochondrial OS=Mus musculus GN=Pdk3 PE=1 SV=1	6.26506	2	2	2	415	47.893	8.82				0.793	1.221	1.089	1.056	1.045	0.492	0.556	0.625		111.2	82.3	88.1	135.7	93	121	117.4	104.7	116.3	167.4
P23591	Tsta3	PE	GDP-L-fucose synthase OS=Mus musculus GN=Tsta3 PE=1 SV=3	8.41121	2	3	2	321	35.855	6.74				1.524	1.484	1.357	0.994	2.548	0.904	0.546	0.483		57.8	94	88.1	85.8	56.8	78.5	57.5	50.3	147.4	104
Q8C0L8	Cog5	PE	Conserved oligomeric Golgi complex subunit 5 OS=Mus musculus GN=Cog5 PE=1 SV=3	2.53317	2	2	2	829	91.334	6.27				0.668	1.134	1.108	0.533	0.493	0.891	0.63	0.374		131.6	112.2	87.9	149.2	79.3	145.8	70.2	47	64.9	125.8
Q08024	Cbfb	PE	Core-binding factor subunit beta OS=Mus musculus GN=Cbfb PE=1 SV=1	12.2995	2	2	2	187	22.017	5.77				1.143	1.033	1.343	0.974	1.885	0.783	1.082	0.881		76.4	81.1	87.4	79	112.1	102.6	74.4	91.3	144.1	103.6
P61971	Nutf2	PE	Nuclear transport factor 2 OS=Mus musculus GN=Nutf2 PE=1 SV=1	6.29921	1	1	1	127	14.469	5.38				0.893	0.882	1.463	0.855	1.757	0.986	0.742	0.653		97.6	109.9	87.2	86.1	82.7	142.8	83.4	72.7	171.5	111.4
B2RUP2	Unc13d	PE	Protein unc-13 homolog D OS=Mus musculus GN=Unc13d PE=1 SV=2	2.58065	3	3	3	1085	123.042	6.62				0.827	1.159	1.129	0.525	0.808	0.877	0.861	0.638		105.3	87.8	87.1	122	86.3	118.9	55.3	63.9	85.1	100.2
Q99L45	Eif2s2	PE	Eukaryotic translation initiation factor 2 subunit 2 OS=Mus musculus GN=Eif2s2 PE=1 SV=1	2.71903	1	1	1	331	38.068	5.8				1.827	1.143	1.228	1.43	2.344	0.934	0.735	0.574		47.6	65	86.9	54.4	51.2	58.4	68	40	111.5	69.6
Q91WD5	Ndufs2	PE	NADH dehydrogenase [ubiquinone] iron-sulfur protein 2, mitochondrial OS=Mus musculus GN=Ndufs2 PE=1 SV=1	7.77538	3	3	3	463	52.592	6.99				1.173	1.203	1.009	1.131	1.239	1.219	0.797	0.839		73.8	101.9	86.6	88.8	66.7	74.4	83.4	70.2	91.4	83.7
Q6DID5	Mum1	PE	PWWP domain-containing protein MUM1 OS=Mus musculus GN=Mum1 PE=1 SV=1	1.02639	1	1	1	682	76.022	8.46				0.929	1.155	0.827	0.912	1.088	0.76	1.51	0.777		93.2	73.6	86.6	107.7	146.3	77.1	85.1	75.3	101.5	96.9
Q9CPX6	Atg3	PE	Ubiquitin-like-conjugating enzyme ATG3 OS=Mus musculus GN=Atg3 PE=1 SV=1	6.36943	2	2	2	314	35.773	4.72				0.881	0.797	1.154	0.959	1.237	0.946	0.855	0.764		98	90.7	86.3	78	82	113	93.9	73.3	121.2	95.9
Q9QYI3	Dnajc7	PE	DnaJ homolog subfamily C member 7 OS=Mus musculus GN=Dnajc7 PE=1 SV=2	1.21457	1	1	1	494	56.44	6.49				1.239	0.951	1.393	1.002	2.173	0.951	0.677	0.6		69.6	85.9	86.2	66.2	61.1	96.9	69.7	54.2	151.2	90.3
Q9DB34	Chmp2a	PE	Charged multivesicular body protein 2a OS=Mus musculus GN=Chmp2a PE=1 SV=1	12.1622	2	2	2	222	25.118	5.97				1.174	1.464	1.556	1.944	1.48	1.102	1.026	1.172		73.3	94.5	86.1	107.4	88	114.1	142.6	100.5	108.5	85.7
P60762	Morf4l1	PE	Mortality factor 4-like protein 1 OS=Mus musculus GN=Morf4l1 PE=1 SV=2	5.8011	2	2	2	362	41.467	9.32				1.282	0.988	0.857	1.319	1.462	0.762	0.646	0.763		66.9	64.8	85.7	66.1	55	57.3	88.2	64.9	97.8	85
Q8BM55	Tmem214	PE	Transmembrane protein 214 OS=Mus musculus GN=Tmem214 PE=1 SV=1	1.16448	1	1	1	687	76.381	9.29				0.728	1.151	1.026	0.48	0.547	0.849	1.098	0.634		117.8	93.8	85.7	135.5	121.2	120.9	56.5	70	64.5	110.4
O55028	Bckdk	PE	[3-methyl-2-oxobutanoate dehydrogenase [lipoamide]] kinase, mitochondrial OS=Mus musculus GN=Bckdk PE=1 SV=1	4.85437	2	2	2	412	46.558	8.91				0.838	1.145	0.824	1.47	0.938	0.954	0.762	1.421		102.1	83.2	85.6	116.9	66.4	84.1	150.1	123.8	95.7	87.2
Q6ZQL4	Wdr43	PE	WD repeat-containing protein 43 OS=Mus musculus GN=Wdr43 PE=2 SV=2	0.886263	1	1	1	677	75.334	5.38				1.339	1.037	1.473	1.674	1.218	0.502	0.838	0.768		63.9	50.1	85.6	66.2	83.6	94.1	107	76.7	77.8	99.8
Q9DAR7	Dcps	PE	m7GpppX diphosphatase OS=Mus musculus GN=Dcps PE=1 SV=1	5.32544	2	2	2	338	38.964	6.48				1	0.815	1.015	0.598	1.66	0.711	0.539	0.534		85.1	77.4	85.1	69.4	58.7	86.4	50.9	58.2	141.3	108.9
O70318	Epb41l2	PE	Band 4.1-like protein 2 OS=Mus musculus GN=Epb41l2 PE=1 SV=2	1.82186	2	2	2	988	109.873	5.43				1.194	1.525	1.366	1.154	1.757	0.584	0.685	0.762		71.1	74.7	84.9	108.5	87.6	97.2	82.1	97.5	125	127.9
P00405	Mtco2	PE	Cytochrome c oxidase subunit 2 OS=Mus musculus GN=Mtco2 PE=1 SV=1	3.0837	1	1	1	227	25.959	4.73				1.638	1.756	1.648	0.804	3.166	1.162	0.465	0.377		51.9	126	84.9	91.1	50.4	85.5	41.7	40.9	164.2	108.4
Q61878	Prg2	PE	Bone marrow proteoglycan OS=Mus musculus GN=Prg2 PE=1 SV=1	5.38117	1	1	1	223	24.24	6.2	Y		Y	100	100	100	100	100	0.252	2.099	0.822			5.9	84.8	13.9	49.6	48.6	86.7	19.4	9.6	23.6
O88844	Idh1	PE	Isocitrate dehydrogenase [NADP] cytoplasmic OS=Mus musculus GN=Idh1 PE=1 SV=2	5.7971	3	4	2	414	46.644	7.17				1.036	0.951	1.016	1.172	0.963	1.432	0.945	1.056		81.6	108.4	84.6	77.6	71.5	83	95.7	80	78.6	75.7
E9PY39	Gm20431	PE	Uncharacterized protein OS=Mus musculus GN=Gm20431 PE=3 SV=1	1.61725	1	1	1	371	42.069	6.76				1.457	1.221	1.513	0.954	2.394	1.324	0.758	0.605		58.1	100.2	84.6	70.9	57.3	87.9	55.4	45.8	139	75.7
Q9D3D9	Atp5d	PE	ATP synthase subunit delta, mitochondrial OS=Mus musculus GN=Atp5d PE=1 SV=1	8.33333	1	4	1	168	17.589	5.08				0.786	0.699	0.626	0.608	1.072	0.798	0.458	0.538		107.4	87.3	84.5	75.1	50.1	67.2	65.3	58.8	115.2	109.4
Q8BVE3	Atp6v1h	PE	V-type proton ATPase subunit H OS=Mus musculus GN=Atp6v1h PE=1 SV=1	4.14079	2	2	2	483	55.819	6.61				0.742	0.913	0.76	0.488	0.446	0.81	0.555	0.4		113.8	78.9	84.4	103.9	54	86.5	55.6	39	50.7	97.4
Q9D338	Mrpl19	PE	39S ribosomal protein L19, mitochondrial OS=Mus musculus GN=Mrpl19 PE=1 SV=1	2.73973	1	1	1	292	33.556	9.44				0.947	1.177	1.029	1.379	1.12	0.847	1.353	1.137		89.2	74.2	84.4	105	118.5	91.7	123	99.6	99.9	87.6
Q9DBE9	Ftsj3	PE	pre-rRNA processing protein FTSJ3 OS=Mus musculus GN=Ftsj3 PE=1 SV=1	1.67064	2	2	2	838	95.474	8.38				1.126	1.531	1.787	1.085	1.672	0.71	1.556	1.447		75	66.6	84.4	114.8	146	134	81.3	135.7	125.4	93.8
P03921	Mtnd5	PE	NADH-ubiquinone oxidoreductase chain 5 OS=Mus musculus GN=Mtnd5 PE=1 SV=3	1.15321	1	1	1	607	68.429	9.03				1.236	1.21	1.204	1.32	2.106	0.973	0.597	0.646		68.3	91.2	84.4	82.6	55.9	82.2	90.1	60.6	143.8	93.7
P62071	Rras2	PE	Ras-related protein R-Ras2 OS=Mus musculus GN=Rras2 PE=1 SV=1	3.43137	1	1	1	204	23.385	6.01				0.943	0.628	0.956	0.715	1.058	1.431	1.03	0.997		89.3	99.1	84.3	56.1	71.3	85.4	63.8	69	94.5	69.3
Q5SX40	Myh1	PE	Myosin-1 OS=Mus musculus GN=Myh1 PE=1 SV=1	0.30896	1	1	1	1942	223.203	5.76				1.127	1.854	1.644	1.033	1.459	0.876	1.813	0.964		74.7	77	84.1	138.5	159.4	122.8	77.1	84.7	108.9	87.9
O35864	Cops5	PE	COP9 signalosome complex subunit 5 OS=Mus musculus GN=Cops5 PE=1 SV=3	2.39521	1	1	1	334	37.525	6.54				1.219	0.92	1.098	1.145	1.987	0.916	0.476	0.738		68.6	76.1	83.7	63.1	39.6	75.4	78.5	61.4	136.3	83.1
Q6KAR6	Exoc3	PE	Exocyst complex component 3 OS=Mus musculus GN=Exoc3 PE=1 SV=2	0.794702	1	1	1	755	86.4	6.2				0.487	0.711	0.698	0.496	0.487	0.803	0.517	0.705		170.9	89.3	83.2	121.4	57.6	119.2	84.7	78.4	83.2	111.3
P62874	Gnb1	PE	Guanine nucleotide-binding protein G(I)/G(S)/G(T) subunit beta-1 OS=Mus musculus GN=Gnb1 PE=1 SV=3	5.88235	2	3	2	340	37.353	6				0.651	0.776	0.84	0.968	0.828	1.428	0.893	0.935		127.6	119	83.1	99	74.4	107.2	123.5	77.9	105.7	83.3
Q7TNC4	Luc7l2	PE	Putative RNA-binding protein Luc7-like 2 OS=Mus musculus GN=Luc7l2 PE=1 SV=1	9.94898	4	4	4	392	46.555	10.1				1.057	1.381	1.749	0.915	3.129	1.391	2.833	1.159		78.5	118.8	83	108.5	241.9	137.4	71.9	99	245.8	85.4
Q8C9V1	Tbc1d10c	PE	Carabin OS=Mus musculus GN=Tbc1d10c PE=1 SV=1	4.27928	2	2	2	444	49.898	8.9				1.235	1.316	1.298	1.077	1.858	1.031	2.023	0.817		67	95.9	82.7	88.1	188.3	87	72.1	76	124.4	93
P56135	Atp5j2	PE	ATP synthase subunit f, mitochondrial OS=Mus musculus GN=Atp5j2 PE=1 SV=3	26.1364	2	4	2	88	10.337	9.95				0.888	1.236	1.211	2.554	1.529	0.787	6.043	0.85		93	105.2	82.6	114.9	807.7	112.6	237.5	113.6	142.2	133.7
Q8BHD7	Ptbp3	PE	Polypyrimidine tract-binding protein 3 OS=Mus musculus GN=Ptbp3 PE=1 SV=1	12.6195	7	11	4	523	56.665	9.13				1.076	1.04	1.167	1.062	1.339	0.824	0.941	0.827		76.5	77.7	82.3	79.5	88.7	89.3	81.2	78	102.4	94.3
Q6P1F6	Ppp2r2a	PE	Serine/threonine-protein phosphatase 2A 55 kDa regulatory subunit B alpha isoform OS=Mus musculus GN=Ppp2r2a PE=1 SV=1	4.9217	2	2	2	447	51.659	6.2				0.819	0.918	1.26	0.92	1.088	1.157	1.005	0.84		100.5	100	82.3	92.2	86.9	126.6	92.5	72.7	109.3	86.5
Q9CPS7	Pno1	PE	RNA-binding protein PNO1 OS=Mus musculus GN=Pno1 PE=1 SV=1	11.6935	3	3	3	248	27.437	9.79				0.964	1.763	1.386	1.11	1.347	1.263	6.46	1.021		85.2	145.9	82.1	150.1	745.8	118	94.6	117.9	114.7	115.4
P14602	Hspb1	PE	Heat shock protein beta-1 OS=Mus musculus GN=Hspb1 PE=1 SV=3	4.78469	1	1	1	209	23	6.55				1.51	1.14	1.032	3.213	0.769	1.244	0.605	0.927		54.4	83.6	82.1	62	40.7	56.1	174.7	62.3	41.8	67.2
Q3UFY8	Trmt10c	PE	Mitochondrial ribonuclease P protein 1 OS=Mus musculus GN=Trmt10c PE=1 SV=2	9.66184	3	3	3	414	48.355	9.38				0.908	0.993	0.933	0.94	0.692	0.741	2.789	0.936		90.5	68.6	82.1	89.8	258.1	84.4	85	86.6	62.6	92.5
Q9CVI2	Fam133b	PE	Protein FAM133B OS=Mus musculus GN=Fam133b PE=1 SV=3	3.26531	1	1	1	245	27.936	10.07				0.767	1.064	0.784	0.929	0.795	0.784	1.215	1.032		106.9	78.3	82	113.8	121.2	83.9	99.4	102.9	85	99.8
P28843	Dpp4	PE	Dipeptidyl peptidase 4 OS=Mus musculus GN=Dpp4 PE=1 SV=3	2.10526	2	3	2	760	87.381	6.42				1.349	1.374	1.501	1.099	2.081	1.2	1.094	0.989		60.7	83.7	81.9	83.4	76.3	91.1	66.8	69	126.3	69.8
Q8BZN6	Dock10	PE	Dedicator of cytokinesis protein 10 OS=Mus musculus GN=Dock10 PE=1 SV=3	1.02326	2	2	2	2150	245.602	7.05				1.142	1.089	1.282	1.007	1.041	0.82	0.893	0.934		71.7	62.3	81.9	78.2	67.9	92	72.3	71	74.7	76
Q9CQ91	Ndufa3	PE	NADH dehydrogenase [ubiquinone] 1 alpha subcomplex subunit 3 OS=Mus musculus GN=Ndufa3 PE=1 SV=1	8.33333	1	1	1	84	9.325	8.47				1.111	0.701	0.783	0.959	1.208	1.077	0.808	0.761		73.7	77.7	81.9	51.7	58.2	57.7	70.7	54.9	89	72.1
Q8K370	Acad10	PE	Acyl-CoA dehydrogenase family member 10 OS=Mus musculus GN=Acad10 PE=1 SV=1	0.748363	1	1	1	1069	118.903	8.24				0.844	1.529	1.136	1.105	0.941	1.104	0.877	1.152		97	93.3	81.8	148.3	74.1	110.1	107.2	97.3	91.3	84.5
Q91Z40	Gbp7	PE	Gbp6 protein OS=Mus musculus GN=Gbp7 PE=1 SV=2	7.99373	4	5	3	638	72.675	6.33				0.807	0.903	0.867	0.738	0.915	1.019	0.651	0.956		101.1	83.1	81.6	91.3	53	87.6	74.6	78	92.5	81.5
Q9JLV6	Pnkp	PE	Bifunctional polynucleotide phosphatase/kinase OS=Mus musculus GN=Pnkp PE=1 SV=2	3.83142	2	2	2	522	57.188	7.9				1.249	1.262	1.112	1.026	1.935	0.938	0.669	0.665		65.3	80.9	81.6	82.4	57.7	72.6	67	57.3	126.4	86.2
Q9ERI2	Rab27a	PE	Ras-related protein Rab-27A OS=Mus musculus GN=Rab27a PE=1 SV=1	3.61991	1	2	1	221	25.001	5.36				1.217	1.617	1.117	1.87	1.679	0.976	0.484	0.641		66.8	81.5	81.4	108	40.4	74.6	125	53.6	112.2	83.5
Q8VHP7	Serpinb1b	PE	Leukocyte elastase inhibitor B OS=Mus musculus GN=Serpinb1b PE=1 SV=1	5.2356	2	4	2	382	42.86	6.74				0.815	1.036	2.706	4.16	1.398	0.765	0.812	0.779		99.6	83.8	81.1	103.2	88.9	269.5	414.1	85.3	139.2	109.5
Q9JKY0	Rqcd1	PE	Cell differentiation protein RCD1 homolog OS=Mus musculus GN=Rqcd1 PE=1 SV=1	10.3679	3	3	3	299	33.58	8.03				0.805	1.089	1.119	0.67	1.118	0.91	0.612	0.654		100.3	89.8	80.7	109.3	60.4	112.2	67.2	64.5	112.2	98.7
Q9CY64	Blvra	PE	Biliverdin reductase A OS=Mus musculus GN=Blvra PE=1 SV=1	5.76271	2	2	2	295	33.504	7.02				1.652	4.153	1.538	0.924	2.756	1.342	0.646	0.823		48.9	120.4	80.7	203	57.9	75.2	45.2	73.8	134.7	89.7
A0A0A6YVU8	Gm9774	PE	MCG119397 OS=Mus musculus GN=Gm9774 PE=4 SV=1	7.61671	3	4	3	407	42.121	5.07				1.348	1.438	1.651	1.062	2.033	0.756	0.706	0.605		59.7	78.4	80.6	85.9	73.2	98.6	63.4	62.8	121.5	103.7
P58468	Fam207a	PE	Protein FAM207A OS=Mus musculus GN=Fam207a PE=1 SV=1	12.7854	3	3	3	219	24.799	11				0.639	1.003	0.826	1.341	0.587	0.735	3.9	0.775		126.1	93.8	80.6	126.5	497.9	104.2	169.1	98.9	74	127.7
E9PUR0	Ankhd1	PE	Ankyrin repeat and KH domain-containing 1 OS=Mus musculus GN=Ankhd1 PE=1 SV=1	0.274725	1	1	1	2548	269.51	5.87				1.169	1.228	0.977	1.572	1.418	0.902	0.894	1.228		69	61.5	80.6	84.7	60.9	67.4	108.4	83.7	97.8	68.2
P84091	Ap2m1	PE	AP-2 complex subunit mu OS=Mus musculus GN=Ap2m1 PE=1 SV=1	1.83908	1	1	1	435	49.623	9.54				0.813	0.885	1.021	0.742	1.193	1.025	0.728	1.612		99	89	80.5	87.7	63.2	101.1	73.5	139.9	118.1	86.8
Q9JKR6	Hyou1	PE	Hypoxia up-regulated protein 1 OS=Mus musculus GN=Hyou1 PE=1 SV=1	0.700701	1	1	1	999	111.112	5.19				1.087	1.009	1.043	0.853	1.667	0.756	0.465	0.525		74	71.1	80.4	74.7	43.8	77.2	63.1	49.4	123.3	94.1
P11352	Gpx1	PE	Glutathione peroxidase 1 OS=Mus musculus GN=Gpx1 PE=1 SV=2	10.4478	2	3	2	201	22.316	7.21				0.989	1.091	0.782	0.988	0.958	0.852	0.709	0.818		81.1	71.1	80.2	88.5	59.1	63.4	80.1	68.3	77.7	83.4
Q80U16	Fam65b	PE	Protein FAM65B OS=Mus musculus GN=Fam65b PE=1 SV=2	1.2987	1	1	1	1078	118.896	5.64				1.278	0.748	1.229	0.722	1.822	1.037	0.57	0.79		62.8	77.7	80.2	47	42.7	77.2	45.3	59.2	114.4	74.9
Q78IK2	Usmg5	PE	Up-regulated during skeletal muscle growth protein 5 OS=Mus musculus GN=Usmg5 PE=1 SV=1	44.8276	2	2	2	58	6.377	9.83				0.83	1.266	1.306	1.136	1.104	1.183	4.68	1.646		96.3	113.2	80	121.9	448.1	125.8	109.4	157.6	106.3	95.7
Q8R146	Apeh	PE	Acylamino-acid-releasing enzyme OS=Mus musculus GN=Apeh PE=1 SV=3	0.819672	1	1	1	732	81.529	5.59				1.271	0.672	1.107	0.952	1.853	0.881	0.534	0.428		62.8	71.1	79.9	42.2	43.1	69.6	59.8	34.6	116.4	80.7
Q8C827	Zfp62	PE	Zinc finger protein 62 OS=Mus musculus GN=Zfp62 PE=1 SV=1	0.984683	1	1	1	914	104.744	8.85				0.802	1.052	0.674	1.224	0.997	0.72	0.778	1.356		99.4	58	79.8	104.6	62.7	67	121.8	109.2	99.1	80.6
Q9D0G0	Mrps30	PE	28S ribosomal protein S30, mitochondrial OS=Mus musculus GN=Mrps30 PE=1 SV=1	4.52489	2	2	2	442	49.908	9.38				0.653	0.754	0.759	0.999	0.788	0.92	1.387	0.972		121.6	87	79.5	91.7	131.3	92.3	121.5	92	95.8	94.7
P07903	Ercc1	PE	DNA excision repair protein ERCC-1 OS=Mus musculus GN=Ercc1 PE=2 SV=2	2.68456	1	1	1	298	32.889	7.36				0.809	1.235	0.859	1.241	0.844	0.886	0.713	1.315		98.3	76.3	79.5	121.4	61.4	84.5	122	113.3	83	86.2
P50431	Shmt1	PE	Serine hydroxymethyltransferase, cytosolic OS=Mus musculus GN=Shmt1 PE=1 SV=3	4.81172	2	2	1	478	52.567	6.95				1.742	0.78	2.085	0.795	2.839	0.822	0.444	0.587		45.6	64.4	79.4	35.6	34.8	95.1	36.3	45.9	129.5	78.3
Q9D1I6	Mrpl14	PE	39S ribosomal protein L14, mitochondrial OS=Mus musculus GN=Mrpl14 PE=1 SV=1	31.7241	4	5	4	145	15.864	10.99				0.789	1.041	0.775	1.277	0.654	0.652	3.468	1.013		100.4	69.1	79.2	104.5	367.4	77.8	128.2	107.3	65.7	105.9
Q99J56	Derl1	PE	Derlin-1 OS=Mus musculus GN=Derl1 PE=1 SV=1	7.17131	2	2	2	251	28.816	9.51				1.015	0.924	1.041	0.733	0.822	0.981	1.152	0.648		78.1	71.7	79.2	72.2	84.3	81.3	57.2	47.4	64.1	73.1
Q8BKS9	Pum3	PE	Pumilio homolog 3 OS=Mus musculus GN=Pum3 PE=1 SV=2	1.23648	1	1	1	647	72.754	9.66				1.207	1.161	1.228	1.11	1.364	0.697	0.849	0.601		65.7	65.1	79.2	76.2	79.3	80.7	72.9	56.1	89.6	93.4
Q64339	Isg15	PE	Ubiquitin-like protein ISG15 OS=Mus musculus GN=Isg15 PE=1 SV=4	16.7702	2	2	2	161	17.886	7.9				2.105	1.225	2.734	0.652	4.225	2.487	1.855	4.487		37.6	99.7	79.1	46	74.4	102.7	24.5	179.9	158.7	40.1
Q8R1M2	H2afj	PE	Histone H2A.J OS=Mus musculus GN=H2afj PE=1 SV=1	62.7907	8	100	1	129	14.037	11.05				0.602	0.791	1.227	2.181	0.54	0.455	3.323	1.227		131.2	51.2	79	103.7	374	161	286.1	138.1	70.9	112.6
P35279	Rab6a	PE	Ras-related protein Rab-6A OS=Mus musculus GN=Rab6a PE=1 SV=4	13.4615	3	4	2	208	23.575	5.54				1.128	3.201	1.102	1.082	1.42	0.994	0.48	0.537		70	100.1	79	224.2	48.4	77.2	75.8	54	99.5	100.7
Q9JHC9	Elf2	PE	ETS-related transcription factor Elf-2 OS=Mus musculus GN=Elf2 PE=1 SV=1	1.18044	1	1	1	593	63.163	6.42				0.996	0.989	0.869	1.258	1.201	0.773	0.685	0.879		79.3	76.8	79	78.5	68	68.9	99.7	87.3	95.3	99.3
Q3UB74	Tbrg1	PE	Transforming growth factor beta regulator 1 OS=Mus musculus GN=Tbrg1 PE=1 SV=2	1.97044	1	1	1	406	44.853	7.59				1.145	1.097	0.827	1.824	1.022	0.863	1.008	1.243		68.7	62.5	78.7	75.4	73	56.8	125.3	90.1	70.3	72.4
B2RQC6	Cad	PE	CAD protein OS=Mus musculus GN=Cad PE=1 SV=1	1.07865	2	2	2	2225	243.084	6.43				1.174	1.172	1.294	0.828	1.538	0.429	0.383	0.569		67	51.9	78.7	78.5	46.4	86.7	55.4	68.9	103.1	121.1
Q8CH02	Sugp1	PE	SURP and G-patch domain-containing protein 1 OS=Mus musculus GN=Sugp1 PE=1 SV=1	4.97667	2	2	2	643	72.604	7.64				0.652	1.062	0.733	1.242	0.591	0.831	0.787	0.962		120.4	87.2	78.5	127.8	82.6	88.2	149.5	101	71.1	105
Q9Z277	Baz1b	PE	Tyrosine-protein kinase BAZ1B OS=Mus musculus GN=Baz1b PE=1 SV=2	1.48749	3	3	3	1479	170.544	8.6				0.702	0.793	0.82	1.223	0.552	0.731	1.089	0.945		111.6	66.9	78.3	88.5	99.7	91.6	136.5	86.5	61.6	91.5
Q9CY57	Chtop	PE	Chromatin target of PRMT1 protein OS=Mus musculus GN=Chtop PE=1 SV=2	11.6466	2	3	2	249	26.568	12.23				1.489	1.551	1.942	1.145	1.748	1.231	2.872	1.729		52.5	61.7	78.1	81.4	143.9	101.9	60.1	86.6	91.7	50.1
Q06185	Atp5i	PE	ATP synthase subunit e, mitochondrial OS=Mus musculus GN=Atp5i PE=1 SV=2	45.0704	3	5	3	71	8.23	9.35				1.209	0.392	2.042	0.665	1.562	1.128	12.742	1.026		64.5	103.6	78	25.3	1170.6	131.8	42.9	94.3	100.8	91.9
Q3U186	Rars2	PE	Probable arginine--tRNA ligase, mitochondrial OS=Mus musculus GN=Rars2 PE=1 SV=1	7.61246	4	4	4	578	65.295	8.02				0.641	1.139	3.763	0.779	0.535	0.686	0.83	0.763		121.7	77.1	78	138.6	93.3	457.9	94.9	85.7	65.1	112.4
Q6NZR2	Msantd2	PE	Myb/SANT-like DNA-binding domain-containing protein 2 OS=Mus musculus GN=Msantd2 PE=1 SV=1	1.78891	1	1	1	559	61.323	6.05				0.981	1.034	0.926	1.299	0.987	0.652	1.357	0.83		79.4	59.6	77.8	82.1	124.1	73.5	103.2	75.9	78.3	91.4
Q9R1C7	Prpf40a	PE	Pre-mRNA-processing factor 40 homolog A OS=Mus musculus GN=Prpf40a PE=1 SV=1	2.51836	3	3	3	953	108.412	7.69				0.862	0.911	0.696	0.796	0.92	0.819	0.645	1.107		90	64.7	77.6	82	51	62.7	71.6	87.4	82.8	79
Q9DBL1	Acadsb	PE	Short/branched chain specific acyl-CoA dehydrogenase, mitochondrial OS=Mus musculus GN=Acadsb PE=1 SV=1	3.47222	2	2	2	432	47.843	7.87				0.811	1.892	1.051	1.104	1.351	0.549	0.783	1.061		95.7	56.4	77.6	181	80.5	100.5	105.6	109.1	129.2	102.9
Q8BTV1	Tusc3	PE	Tumor suppressor candidate 3 OS=Mus musculus GN=Tusc3 PE=1 SV=1	2.01729	1	1	1	347	39.523	10.11				1.005	1.043	1.182	1.031	1.39	1.109	1.213	0.941		77.2	83.5	77.6	80.6	91.4	91.3	79.7	70.8	107.4	75.3
Q99L43	Cds2	PE	Phosphatidate cytidylyltransferase 2 OS=Mus musculus GN=Cds2 PE=1 SV=1	4.05405	2	2	2	444	51.28	7.05				1.666	1.25	1.699	0.589	2.406	1.569	1.146	1.297		46.6	80.3	77.5	58.2	58.6	79.1	27.4	66.4	112	51.2
Q9D855	Uqcrb	PE	Cytochrome b-c1 complex subunit 7 OS=Mus musculus GN=Uqcrb PE=1 SV=3	21.6216	3	3	3	111	13.519	9.11				0.687	0.997	0.742	0.721	1.116	0.847	3.26	0.804		112.2	84.5	77.1	111.9	325	83.3	80.9	80.1	125.3	99.7
Q9JI13	Utp3	PE	Something about silencing protein 10 OS=Mus musculus GN=Utp3 PE=1 SV=1	1.70576	1	1	1	469	53.367	5.54				0.61	0.63	0.458	0.965	0.433	0.602	0.663	1.263		126.1	52.7	77	79.5	58	57.8	121.7	110.5	54.6	87.5
Q80WW9	Ddrgk1	PE	DDRGK domain-containing protein 1 OS=Mus musculus GN=Ddrgk1 PE=1 SV=2	5.71429	2	2	2	315	35.956	5.35				1.429	0.675	0.977	0.855	1.203	1.033	0.939	0.524		53.8	54.2	76.9	36.3	49.3	52.6	46	27.5	64.7	52.5
O88455	Dhcr7	PE	7-dehydrocholesterol reductase OS=Mus musculus GN=Dhcr7 PE=1 SV=1	1.4862	1	2	1	471	53.883	8.35				0.944	1.296	1.367	0.732	1.291	1.114	1.019	0.568		81.3	92.6	76.7	105.3	84.8	111.1	59.5	47.3	104.9	83.2
F8VQC1	Srp72	PE	Signal recognition particle subunit SRP72 OS=Mus musculus GN=Srp72 PE=1 SV=1	1.19225	1	1	1	671	74.611	9.23				1.395	1.168	1.506	0.98	2.392	1.152	1.745	1.081		54.8	59.7	76.4	64	90.4	82.5	53.7	56	131	51.8
Q8R5H1	Usp15	PE	Ubiquitin carboxyl-terminal hydrolase 15 OS=Mus musculus GN=Usp15 PE=1 SV=1	0.815494	1	1	1	981	112.254	5.17				1.031	0.992	1.205	1.193	1.25	1.038	0.955	0.98		74	78.1	76.3	73.4	71.8	89.1	88.3	73.7	92.4	75.2
O88543	Cops3	PE	COP9 signalosome complex subunit 3 OS=Mus musculus GN=Cops3 PE=1 SV=3	1.89125	1	2	1	423	47.801	6.65				1.544	1.027	1.134	1.086	2.203	0.792	0.623	0.821		49.4	63.9	76.3	50.8	50.3	56	53.7	66.3	108.9	80.7
Q8BG79	Cwf19l2	PE	CWF19-like protein 2 OS=Mus musculus GN=Cwf19l2 PE=1 SV=1	3.38219	3	3	3	887	103.108	8.5				1.14	1.17	0.957	1.319	1.208	0.704	1.097	0.96		66.7	56.1	76.1	78.1	87.4	63.8	88	76.5	80.6	79.7
Q8K215	Lyrm4	PE	LYR motif-containing protein 4 OS=Mus musculus GN=Lyrm4 PE=1 SV=1	8.79121	1	1	1	91	10.848	10.13				0.573	0.885	0.667	0.903	0.599	0.73	1.816	0.886		132.8	81.1	76.1	117.6	201.6	88.7	119.9	98.4	79.6	111
Q02111	Prkcq	PE	Protein kinase C theta type OS=Mus musculus GN=Prkcq PE=1 SV=1	3.53607	2	2	2	707	81.519	7.71				0.858	2.197	1.344	0.735	1.451	0.868	0.799	0.569		88.4	129.8	75.9	194.3	119.5	118.8	65	85	128.3	149.5
Q3TC33	Ccdc127	PE	Coiled-coil domain-containing protein 127 OS=Mus musculus GN=Ccdc127 PE=1 SV=2	4.23077	1	1	1	260	30.49	9.13				1.033	1.764	1.629	1.133	0.822	0.964	1.27	0.911		73.5	72	75.9	129.7	94.9	119.7	83.3	68.1	60.4	74.7
Q8HWB2	H2-Q4	PE	Histocompatibility 2, Q region locus 4 OS=Mus musculus GN=H2-Q4 PE=1 SV=1	8.75706	3	4	1	354	39.593	6.62				1.264	1.61	1.078	0.987	0.847	1.058	1.019	0.638		60	83.1	75.8	96.6	80.1	64.7	59.2	50.1	50.8	78.5
P11438	Lamp1	PE	Lysosome-associated membrane glycoprotein 1 OS=Mus musculus GN=Lamp1 PE=1 SV=2	2.70936	1	2	1	406	43.837	8.4				0.616	0.582	1.495	0.608	0.617	1.011	1.099	0.826		123.1	97.5	75.8	71.6	105.9	184.1	74.9	79.6	76	96.4
Q80SU7	Gvin1	PE	Interferon-induced very large GTPase 1 OS=Mus musculus GN=Gvin1 PE=1 SV=1	0.288422	1	1	1	2427	280.637	6.57				0.793	1.013	0.957	0.834	0.972	0.662	0.598	1.09		95.6	68	75.8	96.8	61.5	91.5	79.8	112	92.9	102.8
P21107	Tpm3	PE	Tropomyosin alpha-3 chain OS=Mus musculus GN=Tpm3 PE=1 SV=3	20.7018	8	10	2	285	32.974	4.72				0.672	0.608	0.687	0.48	0.784	0.974	0.728	0.486		112.5	101.3	75.6	68.4	75.7	77.2	54	50.6	88.2	104
Q8BH04	Pck2	PE	Phosphoenolpyruvate carboxykinase [GTP], mitochondrial OS=Mus musculus GN=Pck2 PE=1 SV=1	2.8125	2	2	2	640	70.482	7.28				0.949	1.283	1.44	1.097	1.25	0.528	0.568	0.635		79.7	61	75.6	102.2	65.6	114.7	87.4	73.4	99.6	115.6
Q7TMY8	Huwe1	PE	E3 ubiquitin-protein ligase HUWE1 OS=Mus musculus GN=Huwe1 PE=1 SV=5	0.365547	2	2	2	4377	482.332	5.22				1.097	0.987	0.842	0.927	1.539	1.086	0.669	0.822		68.9	83.4	75.6	68	51.4	58	63.9	63.1	106.1	76.8
Q9CQZ5	Ndufa6	PE	NADH dehydrogenase [ubiquinone] 1 alpha subcomplex subunit 6 OS=Mus musculus GN=Ndufa6 PE=1 SV=1	19.084	2	2	2	131	15.273	10.11				0.925	1.021	0.895	1.015	0.988	0.838	0.947	0.762		81.6	73.2	75.5	83.3	82.6	73	82.9	66.5	80.6	87.3
Q9QXZ0	Macf1	PE	Microtubule-actin cross-linking factor 1 OS=Mus musculus GN=Macf1 PE=1 SV=2	0.979059	7	7	6	7354	831.362	5.43				0.704	0.944	0.823	0.822	0.968	0.831	0.902	0.838		107	85.1	75.3	100.9	92.4	88	87.9	85.9	103.6	102.5
Q99LC3	Ndufa10	PE	NADH dehydrogenase [ubiquinone] 1 alpha subcomplex subunit 10, mitochondrial OS=Mus musculus GN=Ndufa10 PE=1 SV=1	4.78873	2	3	2	355	40.578	7.78				0.961	0.809	0.693	0.699	1.208	0.769	1.38	0.777		78.4	62.4	75.3	63.4	112	54.3	54.8	63	94.7	81.1
P84089	Erh	PE	Enhancer of rudimentary homolog OS=Mus musculus GN=Erh PE=1 SV=1	17.3077	2	2	2	104	12.251	5.92				1.11	1.15	1.186	1.172	0.906	0.704	1.193	0.829		67.7	58.9	75.2	77.9	99.8	80.4	79.4	69.3	61.4	83.7
Q8R1G6	Pdlim2	PE	PDZ and LIM domain protein 2 OS=Mus musculus GN=Pdlim2 PE=1 SV=1	14.0401	4	4	4	349	37.68	8.7				1.107	0.962	1.307	1.09	1.688	0.821	2.022	0.631		67.8	95.1	75	65.2	234.2	88.6	73.9	73.1	114.4	115.8
Q923D5	Wbp11	PE	WW domain-binding protein 11 OS=Mus musculus GN=Wbp11 PE=1 SV=2	3.12012	2	2	2	641	69.831	8.4				1.114	1.559	1.456	1.27	1.354	0.888	1.314	1.101		67	58.7	74.6	104.4	86.9	97.5	85.1	72.8	90.7	66.1
Q6P5G3	Mbtd1	PE	MBT domain-containing protein 1 OS=Mus musculus GN=Mbtd1 PE=1 SV=1	1.42631	1	1	1	631	70.624	7.77				1.036	1.413	0.855	1.516	0.91	0.72	0.544	1.035		71.8	65.2	74.4	101.4	49.3	61.4	108.8	93.7	65.3	90.5
A2CEK3	Pgm2	PE	Phosphoglucomutase-2 OS=Mus musculus GN=Pgm2 PE=1 SV=1	3.62069	2	2	2	580	63.707	5.72				0.84	0.85	1.102	0.846	1.317	1.031	0.803	0.782		88.5	73.2	74.3	75.2	57	97.5	74.8	55.5	116.6	71
P97855	G3bp1	PE	Ras GTPase-activating protein-binding protein 1 OS=Mus musculus GN=G3bp1 PE=1 SV=1	5.16129	2	2	2	465	51.797	5.59				1.118	0.908	0.978	1.038	0.85	0.933	1.625	1.073		66.4	63.3	74.3	60.3	110.2	65	69	72.8	56.5	67.9
Q3UM45	Ppp1r7	PE	Protein phosphatase 1 regulatory subunit 7 OS=Mus musculus GN=Ppp1r7 PE=1 SV=2	7.75623	2	2	2	361	41.266	4.92				1.05	1.004	1.059	0.926	1.312	1.206	0.826	0.847		70.7	83.4	74.2	70.9	57.1	74.8	65.4	58.6	92.7	69.1
Q9WVL0	Gstz1	PE	Maleylacetoacetate isomerase OS=Mus musculus GN=Gstz1 PE=1 SV=1	2.77778	1	1	1	216	24.26	7.85				1.068	1.58	1.561	0.849	1.439	0.688	1.031	0.662		69.5	72.3	74.2	109.7	108.2	108.4	58.9	69.5	99.9	105
P56546	Ctbp2	PE	C-terminal-binding protein 2 OS=Mus musculus GN=Ctbp2 PE=1 SV=2	1.57303	1	1	1	445	48.926	6.95				0.804	2.61	1.087	1.343	1.042	0.671	0.74	0.489		92.2	90	74.2	240.6	99.3	100.2	123.8	65.5	96.1	134.1
Q8BIH0	Sap130	PE	Histone deacetylase complex subunit SAP130 OS=Mus musculus GN=Sap130 PE=1 SV=2	2.93283	3	3	3	1057	111.159	9.91				0.947	0.861	0.956	1.243	1.19	0.851	0.512	0.845		78.4	71.6	74.2	67.5	43.1	74.9	97.4	71.1	93.2	84.1
Q8R2Q4	Gfm2	PE	Ribosome-releasing factor 2, mitochondrial OS=Mus musculus GN=Gfm2 PE=1 SV=2	1.02696	1	1	1	779	86.055	6.43				0.669	1.039	0.977	0.951	0.782	0.92	0.95	1.174		110.8	74.5	74.2	115.1	76.9	108.3	105.4	95	86.6	80.9
Q6A0D4	Rftn1	PE	Raftlin OS=Mus musculus GN=Rftn1 PE=1 SV=4	1.26354	1	1	1	554	61.499	7.68				0.995	0.904	0.86	0.769	1.046	0.83	0.942	0.72		74.6	66.1	74.2	67.4	75	64.1	57.4	57.3	78	79.6
P08030	Aprt	PE	Adenine phosphoribosyltransferase OS=Mus musculus GN=Aprt PE=1 SV=2	3.88889	1	1	1	180	19.712	6.79				1.343	1.325	1.748	0.425	3.186	0.959	0.609	0.527		54.9	88.8	73.7	72.8	56.4	96	23.3	48.8	175	92.6
P54116	Stom	PE	Erythrocyte band 7 integral membrane protein OS=Mus musculus GN=Stom PE=1 SV=3	5.28169	2	3	2	284	31.355	6.93				0.833	0.892	1.71	7.745	1.469	0.765	0.359	0.49		87.9	90.3	73.3	78.4	42.3	150.3	680.9	57.9	129.1	118
Q9Z2E1	Mbd2	PE	Methyl-CpG-binding domain protein 2 OS=Mus musculus GN=Mbd2 PE=2 SV=2	2.89855	1	1	1	414	43.474	10.04				1.003	1.398	1.063	1.11	1.221	0.931	1.678	1.169		73.1	55.4	73.3	102.2	99.9	77.7	81.1	69.6	89.2	59.5
Q8K4Z3	Naxe	PE	NAD(P)H-hydrate epimerase OS=Mus musculus GN=Naxe PE=1 SV=1	2.83688	1	1	1	282	30.953	7.69				1.234	1.638	1.164	0.917	0.968	0.828	0.612	0.474		59.4	62.5	73.2	97.2	46.2	69.1	54.5	35.8	57.5	75.5
A0A0G2JDE5	Igkv1-35	PE	Immunoglobulin kappa variable 1-35 (Fragment) OS=Mus musculus GN=Igkv1-35 PE=4 SV=4	10.8333	1	2	1	120	13.059	4.94				0.778	1.917	6.516	14.339	2.956	0.816	1.195	0.864		94	92.9	73.1	180.1	136	612.3	1347.5	98.4	277.8	113.8
P61027	Rab10	PE	Ras-related protein Rab-10 OS=Mus musculus GN=Rab10 PE=1 SV=1	14.5	3	5	1	200	22.527	8.38				1.529	1.642	1.869	1.786	2.086	1.051	0.791	0.634		47.8	87.3	73.1	78.5	65.7	89.3	85.4	52.6	99.7	83
Q9CQR4	Acot13	PE	Acyl-coenzyme A thioesterase 13 OS=Mus musculus GN=Acot13 PE=1 SV=1	12.8571	2	2	2	140	15.173	8.82				0.903	1.597	1.002	0.962	1.176	1.135	0.658	0.74		81	106.4	73.1	129.3	61.7	81.2	77.9	69.4	95.2	93.8
O35215	Ddt	PE	D-dopachrome decarboxylase OS=Mus musculus GN=Ddt PE=1 SV=3	12.7119	1	1	1	118	13.069	6.54				1.389	1.202	1.623	0.711	2.737	0.905	0.666	0.559		52.5	69.3	72.9	63.1	51	85.2	37.3	42.8	143.6	76.6
Q99PL5	Rrbp1	PE	Ribosome-binding protein 1 OS=Mus musculus GN=Rrbp1 PE=1 SV=2	6.85358	1	1	1	1605	172.776	9.33				1.177	1.461	1.125	1.403	2.017	1.012	0.928	1.116		61.9	61.6	72.9	90.5	56.5	69.6	86.9	68	124.8	60.9
Q80X50	Ubap2l	PE	Ubiquitin-associated protein 2-like OS=Mus musculus GN=Ubap2l PE=1 SV=1	1.89702	2	2	2	1107	116.728	7.11				1.036	1.076	0.933	1.151	1.595	0.785	1.095	1.051		70.1	53.8	72.6	75.4	75.1	65.4	80.6	72	111.7	68.5
P17095	Hmga1	PE	High mobility group protein HMG-I/HMG-Y OS=Mus musculus GN=Hmga1 PE=1 SV=4	14.9533	2	2	2	107	11.607	10.32				1.627	1.502	1.471	2.545	1.439	0.954	2.38	1.034		44.6	76.5	72.5	66.9	190.7	65.5	113.4	82.8	64.1	80.1
Q60692	Psmb6	PE	Proteasome subunit beta type-6 OS=Mus musculus GN=Psmb6 PE=1 SV=3	4.20168	1	2	1	238	25.362	5.11				0.674	0.42	0.554	0.742	0.647	0.975	0.623	0.975		107.3	66.4	72.3	45.1	42.4	59.4	79.6	66.3	69.5	68.1
Q99J62	Rfc4	PE	Replication factor C subunit 4 OS=Mus musculus GN=Rfc4 PE=1 SV=1	2.47253	1	1	1	364	39.842	6.7				0.23	0.231	0.196	0.253	0.318	0.518	0.635	0.372		314.9	71.3	72.3	72.6	87.3	61.7	79.7	51.2	100.1	137.6
A2ABV5	Med14	PE	Mediator of RNA polymerase II transcription subunit 14 OS=Mus musculus GN=Med14 PE=1 SV=1	0.411241	1	1	1	1459	160.863	8.53				1.619	1.38	1.687	1.22	2.692	0.543	0.478	0.531		44.6	63.1	72.3	61.6	55.6	75.3	54.4	61.7	120.2	116.2
P08071	Ltf	PE	Lactotransferrin OS=Mus musculus GN=Ltf PE=1 SV=4	1.41443	1	3	1	707	77.788	8.53				1.004	1.521	1.785	5.541	1.217	1.038	0.884	1.026		71.8	77.7	72.1	109.2	66.2	128.1	397.8	76.8	87.4	74.9
Q80U28	Madd	PE	MAP kinase-activating death domain protein OS=Mus musculus GN=Madd PE=1 SV=2	0.951173	2	2	2	1577	175.07	6.04				0.847	1.301	1.118	0.955	1.196	1.002	0.693	0.748		84.8	98.4	71.8	110.3	68.1	94.8	81	73.5	101.5	98.2
P70290	Mpp1	PE	55 kDa erythrocyte membrane protein OS=Mus musculus GN=Mpp1 PE=1 SV=1	2.57511	1	1	1	466	52.194	7.2				1.216	1.213	0.923	1.067	1.382	0.608	0.331	0.634		58.9	58.2	71.6	71.4	31.6	54.4	62.9	60.6	81.4	95.6
O55135	Eif6	PE	Eukaryotic translation initiation factor 6 OS=Mus musculus GN=Eif6 PE=1 SV=2	18.7755	3	3	3	245	26.494	4.74				0.881	0.879	0.995	0.817	0.898	1.173	1.015	1.152		81.2	67.2	71.5	71.4	58.2	80.8	66.4	66	72.9	57.3
Q9DCM2	Gstk1	PE	Glutathione S-transferase kappa 1 OS=Mus musculus GN=Gstk1 PE=1 SV=3	3.09735	1	1	1	226	25.687	8.88				0.928	1.243	1.016	0.99	1.119	1.019	1.079	0.801		77.1	78.7	71.5	95.7	83.4	78.3	76.3	61.9	86.2	77.3
O88738	Birc6	PE	Baculoviral IAP repeat-containing protein 6 OS=Mus musculus GN=Birc6 PE=1 SV=2	0.163867	1	1	1	4882	531.833	6.07				1.213	0.988	1.28	0.92	1.756	0.965	0.689	0.828		58.8	68.8	71.4	58.1	49.1	75.3	54.1	59	103.3	71.3
P97352	S100a13	PE	Protein S100-A13 OS=Mus musculus GN=S100a13 PE=1 SV=1	7.14286	1	1	1	98	11.151	6.13				0.994	1.371	1.454	1.152	1.591	0.743	0.574	0.566		71.6	96.8	71.2	98.2	74.8	104.2	82.6	73.8	114	130.3
Q8K2K6	Agfg1	PE	Arf-GAP domain and FG repeat-containing protein 1 OS=Mus musculus GN=Agfg1 PE=1 SV=2	4.27807	2	2	2	561	58.007	8.63				0.792	1.18	0.923	0.91	0.96	0.888	0.859	0.708		89.2	91.9	70.6	105.2	88.8	82.3	81.2	73.3	85.6	103.4
P70295	Aup1	PE	Ancient ubiquitous protein 1 OS=Mus musculus GN=Aup1 PE=1 SV=1	3.41463	2	2	2	410	46.092	8.4				1.012	0.949	1.133	1.227	1.34	1.422	1.19	1.21		69.7	85.9	70.5	66.1	71.8	78.9	85.5	73	93.4	60.4
J3QM43	Gm6594	PE	Uncharacterized protein OS=Mus musculus GN=Gm6594 PE=4 SV=1	6.31579	1	1	1	95	10.072	10.13				2.168	1.342	4.726	12.158	2.367	1.005	1.62	1.463		32.5	51.3	70.5	43.7	82.8	153.7	395.4	74.7	77	51.1
Q9Z0K8	Vnn1	PE	Pantetheinase OS=Mus musculus GN=Vnn1 PE=1 SV=3	1.17188	1	1	1	512	57.054	5.94				0.753	1.274	1.032	1.321	0.631	0.611	0.429	0.698		93.6	78.6	70.5	119.2	55.2	96.5	123.6	89.8	59.1	128.7
Q9D2H6	Sp2	PE	Transcription factor Sp2 OS=Mus musculus GN=Sp2 PE=2 SV=2	4.08497	2	2	2	612	64.868	9.88				0.998	0.842	0.678	1.294	1.152	0.711	5.001	0.87		70.6	51.5	70.4	59.4	361.8	47.8	91.3	63	81.3	72.4
Q99JW4	Lims1	PE	LIM and senescent cell antigen-like-containing domain protein 1 OS=Mus musculus GN=Lims1 PE=1 SV=3	6.15385	2	2	2	325	37.215	8.05				0.819	2.424	1.221	1.194	1.211	1.214	3.631	1.087		86	107.9	70.4	208.5	322.6	105	102.7	96.6	104.2	88.8
P50518	Atp6v1e1	PE	V-type proton ATPase subunit E 1 OS=Mus musculus GN=Atp6v1e1 PE=1 SV=2	4.42478	1	2	1	226	26.141	8.43				0.789	0.896	0.638	0.925	0.621	0.95	0.44	0.557		88.8	77.9	70.1	79.5	36	56.6	82.1	45.7	55.1	82
A2AGT5	Ckap5	PE	Cytoskeleton-associated protein 5 OS=Mus musculus GN=Ckap5 PE=1 SV=1	0.836614	2	2	2	2032	225.492	7.96				0.665	0.919	0.958	1.138	0.828	0.805	0.636	1.061		105.3	70.1	70.1	96.8	55.3	100.8	119.8	92.3	87.1	87
Q62470	Itga3	PE	Integrin alpha-3 OS=Mus musculus GN=Itga3 PE=1 SV=1	1.04463	1	1	1	1053	116.671	6.57				0.806	1.007	0.518	0.92	0.499	0.492	0.515	0.727		86.9	47	70	87.4	49.2	45	80	69.4	43.4	95.5
Q9EQP2	Ehd4	PE	EH domain-containing protein 4 OS=Mus musculus GN=Ehd4 PE=1 SV=1	1.2939	1	1	1	541	61.441	6.76				1.159	1.05	1.46	1.739	2.219	0.869	0.846	0.88		60.4	66.9	70	63.4	65.1	88.2	105	67.7	133.9	76.9
Q99MD6	Txnrd3	PE	Thioredoxin reductase 3 OS=Mus musculus GN=Txnrd3 PE=1 SV=3	2.14724	1	1	1	652	71.275	8.09				0.8	1.324	1.467	0.725	0.587	0.995	0.835	0.708		87.5	77.7	70	115.8	65.2	128.3	63.5	55.3	51.4	78.1
Q99KN9	Clint1	PE	Clathrin interactor 1 OS=Mus musculus GN=Clint1 PE=1 SV=2	1.26783	1	1	1	631	68.469	6.25				1.154	1.122	1.318	0.891	1.478	1.117	1.295	0.885		60.6	71.9	69.9	68	83.4	79.9	54	57	89.6	64.4
P68037	Ube2l3	PE	Ubiquitin-conjugating enzyme E2 L3 OS=Mus musculus GN=Ube2l3 PE=1 SV=1	10.3896	2	2	2	154	17.85	8.51				1.753	1.858	2.537	0.802	4.072	0.793	0.468	0.148		39.8	113.9	69.8	74	67.2	101.1	31.9	21.2	162.2	143.7
P84104	Srsf3	PE	Serine/arginine-rich splicing factor 3 OS=Mus musculus GN=Srsf3 PE=1 SV=1	14.0244	2	2	1	164	19.318	11.65				0.845	0.886	1.127	1.23	1.292	0.968	1.304	0.931		82.2	72.5	69.4	72.8	97.6	92.6	101.1	69.7	106.2	74.9
Q99N95	Mrpl3	PE	39S ribosomal protein L3, mitochondrial OS=Mus musculus GN=Mrpl3 PE=1 SV=1	5.45977	2	2	2	348	39.085	9.55				0.883	1.48	1.72	1.309	1.189	0.804	1.906	0.916		78.4	63.9	69.2	116	151.5	134.9	102.6	72.8	93.2	79.5
Q8R3S6	Exoc1	PE	Exocyst complex component 1 OS=Mus musculus GN=Exoc1 PE=1 SV=4	0.894855	1	1	1	894	101.825	6.52				1.108	1.243	1.363	0.947	1.093	0.835	0.74	0.752		62.4	66.4	69.2	77.6	58.9	85.1	59.1	59.8	68.2	79.5
Q99LI5	Znf281	PE	Zinc finger protein 281 OS=Mus musculus GN=Znf281 PE=1 SV=1	1.00784	1	1	1	893	96.625	8.56				0.788	0.792	0.902	0.832	0.783	0.741	2.188	0.946		87.8	61.2	69.2	69.6	180.6	79.2	73.1	78.1	68.8	82.6
P14576	Srp54	PE	Signal recognition particle 54 kDa protein OS=Mus musculus GN=Srp54 PE=1 SV=2	3.57143	2	2	2	504	55.684	8.75				1.273	1.466	1.519	1.468	1.546	1.098	2	0.815		54.3	72.2	69.1	79.5	131.6	82.4	79.6	53.6	83.9	65.8
Q62311	Taf6	PE	Transcription initiation factor TFIID subunit 6 OS=Mus musculus GN=Taf6 PE=1 SV=1	5.01475	3	4	3	678	72.628	8.6				0.628	1.215	0.689	1.263	0.72	0.811	0.67	1.127		108.5	80.8	68.2	131.9	66.7	74.8	137.1	112.3	78.1	99.7
Q6PGF7	Exoc8	PE	Exocyst complex component 8 OS=Mus musculus GN=Exoc8 PE=1 SV=1	2.23464	2	2	2	716	80.984	5.4				0.747	1.183	1.058	0.853	0.762	1.018	0.744	0.58		91.2	102.4	68.1	107.8	74.8	96.4	77.7	58.4	69.5	100.6
Q01149	Col1a2	PE	Collagen alpha-2(I) chain OS=Mus musculus GN=Col1a2 PE=1 SV=2	0.655977	1	1	1	1372	129.478	9.19				1.554	0.904	1.05	0.866	0.778	0.581	0.908	0.667		43.8	31.8	68.1	39.6	49.6	46	37.9	36.5	34.1	54.7
P54822	Adsl	PE	Adenylosuccinate lyase OS=Mus musculus GN=Adsl PE=1 SV=2	4.54545	2	3	2	484	54.831	7.27				2.03	1.159	1.92	0.726	4.184	1.193	0.791	0.509		33.2	64.9	67.5	38.5	43.1	63.8	24.1	27.7	139.1	54.4
Q6PAC3	Dcaf13	PE	DDB1- and CUL4-associated factor 13 OS=Mus musculus GN=Dcaf13 PE=2 SV=2	2.92135	2	2	2	445	51.423	9.32				0.803	0.887	0.82	1.206	0.893	0.613	6.687	0.908		84	45.3	67.5	74.6	494.8	68.9	101.4	67.2	75	74
Q99JR1	Sfxn1	PE	Sideroflexin-1 OS=Mus musculus GN=Sfxn1 PE=1 SV=3	17.3913	4	6	2	322	35.626	9.23				1.22	1.531	1.625	1.088	2.705	1.067	3.794	0.893		55.3	73	67.4	84.6	259.4	89.8	60.1	61	149.5	68.4
Q80X81	Acat3	PE	Acetyl-Coenzyme A acetyltransferase 3 OS=Mus musculus GN=Acat3 PE=1 SV=1	2.01511	1	1	1	397	41.443	7.94				1.165	1.065	1.021	0.908	1.365	1.053	1.017	0.853		57.9	58.6	67.4	61.7	56.5	59.1	52.6	47.4	79	55.6
E9Q4Z2	Acacb	PE	Acetyl-CoA carboxylase 2 OS=Mus musculus GN=Acacb PE=1 SV=1	8.41503	18	108	1	2448	275.574	6.32				0.966	1.328	1.077	1.789	1.34	0.769	0.726	1.434		69.6	49.8	67.3	92.4	47	75	124.5	92.8	93.3	64.7
Q9QZS8	Sh2d3c	PE	SH2 domain-containing protein 3C OS=Mus musculus GN=Sh2d3c PE=1 SV=1	1.17096	1	1	1	854	94.264	7.53				0.924	1.224	0.783	1.408	0.929	0.856	1.011	1.009		72.8	71.6	67.3	89.1	84.7	57	102.5	84.5	67.7	83.7
Q78J03	Msrb2	PE	Methionine-R-sulfoxide reductase B2, mitochondrial OS=Mus musculus GN=Msrb2 PE=1 SV=1	4	1	1	1	175	19.144	9.06				0.713	1.143	0.819	0.924	0.708	0.667	0.587	0.836		94.4	64.7	67.3	107.9	57	77.3	87.2	81.1	66.9	97
Q99JX4	Eif3m	PE	Eukaryotic translation initiation factor 3 subunit M OS=Mus musculus GN=Eif3m PE=1 SV=1	2.13904	1	1	1	374	42.49	5.74				0.741	1.087	0.796	0.895	0.93	0.764	0.474	0.861		90.9	65	67.3	98.7	40.3	72.4	81.3	73.2	84.6	85
P15532	Nme1	PE	Nucleoside diphosphate kinase A OS=Mus musculus GN=Nme1 PE=1 SV=1	38.1579	6	8	1	152	17.197	7.37				1.543	0.971	1.581	1.061	2.752	1.223	0.59	0.444		43.6	81.5	67.2	42.3	39.3	68.9	46.2	29.6	119.9	66.6
Q9JMH9	Myo18a	PE	Unconventional myosin-XVIIIa OS=Mus musculus GN=Myo18a PE=1 SV=2	0.926829	2	3	2	2050	232.611	6.28				0.672	0.753	0.612	0.805	0.649	0.719	0.619	0.701		100	67.2	67.2	75.3	57.9	61.2	80.5	65.5	64.9	93.4
Q91YJ5	Mtif2	PE	Translation initiation factor IF-2, mitochondrial OS=Mus musculus GN=Mtif2 PE=1 SV=2	1.37552	1	1	1	727	81.238	7.24				0.85	1.242	0.907	1.207	1.046	0.956	0.837	1.174		78.9	68	67.1	98	59.5	71.6	95.3	83.5	82.6	71.1
Q6KCD5	Nipbl	PE	Nipped-B-like protein OS=Mus musculus GN=Nipbl PE=1 SV=1	0.607577	2	2	2	2798	315.253	7.91				0.854	1.411	1.165	0.801	0.933	0.88	0.619	0.785		78.6	81.5	67.1	110.9	57.3	91.6	63	72.7	73.4	92.6
P70318	Tial1	PE	Nucleolysin TIAR OS=Mus musculus GN=Tial1 PE=1 SV=1	2.04082	1	1	1	392	43.361	7.99				0.828	1.13	0.851	1.121	1.382	1.313	0.912	1.022		81.1	95.7	67.1	91.6	66.5	69	90.9	74.6	112.1	72.9
Q91YL3	Uckl1	PE	Uridine-cytidine kinase-like 1 OS=Mus musculus GN=Uckl1 PE=1 SV=1	1.64234	1	1	1	548	60.803	7.15				1.171	1.262	1.227	1.507	1.314	0.99	0.881	1.031		57.1	66.4	66.8	72	59.2	70.1	86	69.2	75	67.1
Q9CQA1	Trappc5	PE	Trafficking protein particle complex subunit 5 OS=Mus musculus GN=Trappc5 PE=1 SV=1	9.57447	2	2	2	188	20.782	9.66				0.898	0.802	0.838	0.876	0.916	0.534	0.744	0.57		74.4	64.1	66.8	59.7	89.3	62.3	65.2	68.4	68.2	120
Q8BX09	Rbbp5	PE	Retinoblastoma-binding protein 5 OS=Mus musculus GN=Rbbp5 PE=1 SV=2	3.5316	2	2	2	538	59.061	5.1				0.889	0.882	0.847	1.014	1.088	1.107	0.631	0.807		74.8	80	66.5	66	45.6	63.3	75.9	58.4	81.4	72.3
O35643	Ap1b1	PE	AP-1 complex subunit beta-1 OS=Mus musculus GN=Ap1b1 PE=1 SV=2	6.99894	7	7	1	943	103.869	5.17				1.096	1.141	1.353	1.091	1.088	1.139	0.952	0.83		60.6	73.4	66.4	69.2	61.4	82	66.1	53.5	65.9	64.5
P07724	Alb	PE	Serum albumin OS=Mus musculus GN=Alb PE=1 SV=3	10.0329	7	35	3	608	68.648	6.07				0.768	0.886	1.349	0.614	1.424	0.901	0.774	0.359		86.1	95.8	66.2	76.4	82.3	116.2	52.9	38.1	122.7	106.3
Q9CQD4	Chmp1b2	PE	Charged multivesicular body protein 1b-2 OS=Mus musculus GN=Chmp1b2 PE=2 SV=2	8.0402	2	2	2	199	22.147	8.1				0.959	0.638	0.959	0.682	1.697	0.647	0.48	0.637		69	76.4	66.2	44	56.7	66.2	47	75.2	117	118.1
Q99L13	Hibadh	PE	3-hydroxyisobutyrate dehydrogenase, mitochondrial OS=Mus musculus GN=Hibadh PE=1 SV=1	2.38806	1	1	1	335	35.417	8.13				0.841	0.838	0.876	0.95	1.081	1.051	0.571	1.091		78.7	67.2	66.2	65.9	36.6	68.9	74.8	69.8	85.1	64
Q8R3N6	Thoc1	PE	THO complex subunit 1 OS=Mus musculus GN=Thoc1 PE=1 SV=1	2.73973	2	2	2	657	75.388	4.97				1.045	1.236	0.901	0.992	1.075	0.786	0.664	1.367		63.3	45.5	66.1	78.2	38.5	57	62.8	79.1	68.1	57.9
Q9CQF0	Mrpl11	PE	39S ribosomal protein L11, mitochondrial OS=Mus musculus GN=Mrpl11 PE=1 SV=1	7.8125	2	2	2	192	20.667	9.73				0.735	1.215	1.028	1.146	0.93	0.829	2.522	0.995		89.8	66.6	66	109.1	202.6	92.3	103	80	83.6	80.3
P52633	Stat6	PE	Signal transducer and transcription activator 6 OS=Mus musculus GN=Stat6 PE=1 SV=2	1.79211	2	2	1	837	93.438	6.23				1.907	1.031	1.869	0.376	2.916	1.754	1.328	1.759		34.5	65.7	65.8	35.6	49.7	64.5	13	65.9	100.6	37.5
E9QAM5	Helz2	PE	Helicase with zinc finger domain 2 OS=Mus musculus GN=Helz2 PE=1 SV=1	0.271463	1	1	1	2947	331.352	8.07				1.555	2.302	1.063	1.036	1.521	1.163	1.004	0.901		42.2	60.9	65.6	97.1	52.6	44.8	43.7	47.2	64.1	52.3
O08795	Prkcsh	PE	Glucosidase 2 subunit beta OS=Mus musculus GN=Prkcsh PE=1 SV=1	1.91939	1	1	1	521	58.756	4.46				2.907	1.068	1.851	0.284	4.413	1.994	1.266	1.815		22.6	67.5	65.6	24.1	42.8	41.8	6.4	61.4	99.7	33.8
Q8CG72	Adprhl2	PE	Poly(ADP-ribose) glycohydrolase ARH3 OS=Mus musculus GN=Adprhl2 PE=1 SV=1	6.75676	2	2	2	370	39.389	4.96				1.045	1.241	1.44	0.722	1.945	1.076	0.881	0.655		62.6	85.6	65.4	77.7	70.1	90.2	45.2	52.2	121.7	79.6
Q9CQP0	Mrpl33	PE	39S ribosomal protein L33, mitochondrial OS=Mus musculus GN=Mrpl33 PE=1 SV=1	10.7692	1	1	1	65	7.411	10.89				0.856	1.028	1.12	1.776	0.826	0.57	3.849	0.89		76.5	45.5	65.4	78.6	307.1	85.7	135.8	71	63.1	79.8
P56379	Mp68	PE	6.8 kDa mitochondrial proteolipid OS=Mus musculus GN=Mp68 PE=1 SV=1	13.7931	1	1	1	58	6.694	9.99				0.971	0.907	0.963	0.864	1.444	0.589	3.336	0.497		67.2	61.4	65.3	61	347.9	64.8	58.1	51.8	97.1	104.3
Q99J47	Dhrs7b	PE	Dehydrogenase/reductase SDR family member 7B OS=Mus musculus GN=Dhrs7b PE=1 SV=1	2.78638	1	1	1	323	34.964	9.63				0.832	0.933	0.838	1.02	0.748	0.849	1.462	0.88		78.5	56.8	65.3	73.3	97.9	65.7	80	59	58.7	67
Q60902	Eps15l1	PE	Epidermal growth factor receptor substrate 15-like 1 OS=Mus musculus GN=Eps15l1 PE=1 SV=3	0.882029	1	1	1	907	99.248	5.02				0.889	1.005	1.066	1.35	1.343	0.842	0.599	0.723		73.5	82.4	65.3	73.9	58.6	78.4	99.2	70.8	98.7	97.9
Q505D7	Opa3	PE	Optic atrophy 3 protein homolog OS=Mus musculus GN=Opa3 PE=1 SV=1	15.0838	3	3	3	179	20.097	8.34				1.204	1.355	1.073	1.375	1.7	0.778	2.535	0.92		54.1	53.4	65.2	73.3	174.1	58.1	74.4	63.2	92	68.7
P53996	Cnbp	PE	Cellular nucleic acid-binding protein OS=Mus musculus GN=Cnbp PE=1 SV=2	13.4831	2	2	2	178	19.579	7.58				0.676	0.944	0.859	0.833	0.791	0.631	0.672	0.813		96	59.9	64.9	90.6	63.8	82.4	80	77.3	75.9	95
Q9CPT5	Nop16	PE	Nucleolar protein 16 OS=Mus musculus GN=Nop16 PE=1 SV=1	7.86517	2	2	2	178	21.126	9.91				0.951	1.354	1.364	1.319	1.277	0.854	3.06	0.952		68.3	64.3	64.9	92.4	230.4	93.1	90	71.6	87.2	75.3
Q62193	Rpa2	PE	Replication protein A 32 kDa subunit OS=Mus musculus GN=Rpa2 PE=1 SV=1	2.96296	1	1	1	270	29.7	6.15				1.04	1.78	1.125	1.14	1.151	1.142	0.763	0.656		62.4	81.9	64.9	111	54.7	70.1	71.1	47	71.8	71.7
Q8CEC6	Ppwd1	PE	Peptidylprolyl isomerase domain and WD repeat-containing protein 1 OS=Mus musculus GN=Ppwd1 PE=1 SV=2	1.08359	1	1	1	646	73.338	7.15				0.996	1.151	1.043	1.041	1.588	0.886	1.549	0.655		65.2	70.6	64.9	75.1	123.4	68	67.9	52.1	103.5	79.6
P70303	Ctps2	PE	CTP synthase 2 OS=Mus musculus GN=Ctps2 PE=1 SV=1	2.90102	2	2	1	586	65.473	6.49				0.957	0.967	0.77	0.699	1.332	0.771	0.752	0.762		67.6	53.9	64.7	65.3	52.5	52.1	47.3	53.2	90	69.8
P08121	Col3a1	PE	Collagen alpha-1(III) chain OS=Mus musculus GN=Col3a1 PE=1 SV=4	0.614754	1	1	1	1464	138.858	6.52				1.162	0.811	0.957	0.994	0.366	0.733	0.819	0.403		55.7	40	64.7	45.2	44.7	53.4	55.4	22	20.4	54.6
Q7TSC1	Prrc2a	PE	Protein PRRC2A OS=Mus musculus GN=Prrc2a PE=1 SV=1	1.34384	3	4	2	2158	229.063	9.39				0.97	0.967	1.159	0.866	1.44	0.98	2.28	1.209		66.6	54.8	64.6	64.4	127.5	77.1	57.6	67.6	95.9	55.9
Q9Z1Z0	Uso1	PE	General vesicular transport factor p115 OS=Mus musculus GN=Uso1 PE=1 SV=2	0.729927	1	1	1	959	106.917	4.93				1.345	1.518	1.611	1.388	1.761	0.835	0.563	0.669		48.1	50.1	64.6	73	33.8	77.4	66.7	40.1	84.6	60
Q6ZQ88	Kdm1a	PE	Lysine-specific histone demethylase 1A OS=Mus musculus GN=Kdm1a PE=1 SV=2	2.8136	2	2	2	853	92.793	6.52				0.969	1.054	0.854	2.229	1.575	0.781	0.687	1.703		66.6	52	64.5	70.2	45.7	56.9	148.4	113.3	104.8	66.5
Q9WV55	Vapa	PE	Vesicle-associated membrane protein-associated protein A OS=Mus musculus GN=Vapa PE=1 SV=2	9.63855	2	2	2	249	27.837	8.4				1.084	1.273	1.71	1.075	1.77	1.091	0.754	0.807		59.6	85.8	64.5	75.8	59.3	101.8	64	63.5	105.4	78.7
Q78IK4	Apool	PE	MICOS complex subunit Mic27 OS=Mus musculus GN=Apool PE=1 SV=1	2.26415	1	1	1	265	29.242	9.31				0.819	1.123	0.994	0.778	1.307	1.184	2.423	0.723		78.6	72.8	64.4	88.3	149	78.2	61.2	44.4	102.8	61.5
Q8CH18	Ccar1	PE	Cell division cycle and apoptosis regulator protein 1 OS=Mus musculus GN=Ccar1 PE=1 SV=1	1.57068	2	2	2	1146	131.979	5.76				1.106	1.27	1.136	1.118	1.87	1.01	0.627	0.852		58.1	66.2	64.3	73.9	41.2	66	65	55.9	108.7	65.6
O54950	Prkag1	PE	5'-AMP-activated protein kinase subunit gamma-1 OS=Mus musculus GN=Prkag1 PE=1 SV=2	3.33333	1	1	1	330	37.497	7.14				1.509	1.182	1.843	0.698	1.475	1.669	1.36	1.505		42.6	70.3	64.3	50.4	57.3	78.6	29.8	63.4	62.9	42.1
P62843	Rps15	PE	40S ribosomal protein S15 OS=Mus musculus GN=Rps15 PE=1 SV=2	20	2	6	2	145	17.029	10.39				1.064	1.218	1.079	1.161	0.889	0.757	4.371	1.041		60.2	45	64.1	73.3	259.8	65	70	61.9	53.6	59.4
Q8K3J1	Ndufs8	PE	NADH dehydrogenase [ubiquinone] iron-sulfur protein 8, mitochondrial OS=Mus musculus GN=Ndufs8 PE=1 SV=1	3.77358	1	1	1	212	24.023	6.21				0.884	0.931	0.683	0.982	1.147	0.831	0.541	0.648		72.4	64	64	67.4	41.7	49.4	71	50	83	77.1
Q921F4	Hnrnpll	PE	Heterogeneous nuclear ribonucleoprotein L-like OS=Mus musculus GN=Hnrnpll PE=1 SV=3	3.21489	2	2	2	591	64.084	5.85				1.046	1.234	1.307	0.987	1.86	0.71	0.704	0.568		60.9	70.2	63.7	75.1	69.5	79.6	60.1	56.1	113.3	98.8
Q8BMA6	Srp68	PE	Signal recognition particle subunit SRP68 OS=Mus musculus GN=Srp68 PE=1 SV=2	7.36	3	3	3	625	70.53	8.57				1.559	1.187	1.271	1.038	1.783	0.769	0.82	0.801		40.8	38.9	63.5	48.4	41.4	51.8	42.3	40.5	72.7	50.6
Q3TVP5	Fam105a	PE	Inactive ubiquitin thioesterase FAM105A OS=Mus musculus GN=Fam105a PE=1 SV=1	5.38244	2	2	2	353	41.549	9.22				1.118	0.83	1.391	0.766	1.708	1.087	1.68	0.662		56.8	75.2	63.5	47.2	116.3	79	43.5	45.8	97.1	69.2
Q8VCM7	Fgg	PE	Fibrinogen gamma chain OS=Mus musculus GN=Fgg PE=1 SV=1	2.75229	1	1	1	436	49.36	5.86				1.318	0.881	2.066	2.473	1.752	1.626	1.777	1.308		48.2	72.2	63.5	42.4	78.9	99.6	119.2	58.1	84.4	44.4
Q924L1	Letmd1	PE	LETM1 domain-containing protein 1 OS=Mus musculus GN=Letmd1 PE=1 SV=1	5.55556	2	2	2	360	41.674	10.54				0.876	0.617	0.586	0.772	0.957	0.859	2.136	0.977		72.4	50.2	63.5	44.7	124.9	42.4	55.9	57.2	69.3	58.5
Q8C9B9	Dido1	PE	Death-inducer obliterator 1 OS=Mus musculus GN=Dido1 PE=1 SV=4	0.70922	2	2	2	2256	247.024	7.91				0.935	0.928	0.693	1.065	1.114	1.179	1.296	1.232		67.8	62.2	63.4	62.9	68.4	47	72.2	65	75.5	52.7
Q8VH51	Rbm39	PE	RNA-binding protein 39 OS=Mus musculus GN=Rbm39 PE=1 SV=2	3.39623	2	2	2	530	59.37	10.1				1.305	2.09	1.376	1.082	1.857	1.225	1.43	0.876		48.5	70.4	63.3	101.3	82.2	66.7	52.4	50.3	90	57.5
Q8VC28	Akr1c13	PE	Aldo-keto reductase family 1 member C13 OS=Mus musculus GN=Akr1c13 PE=1 SV=2	2.47678	1	1	1	323	37.034	7.08				1.202	0.865	1.038	0.783	1.703	0.934	0.497	0.707		52.6	58.1	63.2	45.5	30.9	54.6	41.2	44	89.6	62.2
B2KFW1	Zscan20	PE	Zinc finger and SCAN domain-containing protein 20 OS=Mus musculus GN=Zscan20 PE=2 SV=2	2.03883	1	3	1	1030	115.306	6.74				0.666	0.811	0.608	1.064	0.547	0.949	0.665	1.021		94.7	59.6	63.1	76.8	41.8	57.6	100.8	64.2	51.8	62.9
Q8CCJ3	Ufl1	PE	E3 UFM1-protein ligase 1 OS=Mus musculus GN=Ufl1 PE=1 SV=2	2.26986	2	2	2	793	89.464	6.67				0.913	0.988	1.088	1.12	0.934	1.041	0.726	0.746		69	74.4	63	68.2	51.9	75.1	77.3	53.3	64.4	71.5
Q5SWD9	Tsr1	PE	Pre-rRNA-processing protein TSR1 homolog OS=Mus musculus GN=Tsr1 PE=1 SV=1	0.996264	1	1	1	803	92.047	6.99				1.104	1.481	1.314	0.969	1.728	1.054	1.643	1.077		56.9	63.9	62.8	84.3	99.6	74.7	55.1	65.3	98.3	60.6
Q8VDW0	Ddx39a	PE	ATP-dependent RNA helicase DDX39A OS=Mus musculus GN=Ddx39a PE=1 SV=1	15.6909	7	10	1	427	49.036	5.68				1.996	1.498	1.984	1.31	1.899	0.967	1.219	0.999		31.4	34	62.7	47	42.8	62.3	41.1	35.1	59.6	35.2
Q64521	Gpd2	PE	Glycerol-3-phosphate dehydrogenase, mitochondrial OS=Mus musculus GN=Gpd2 PE=1 SV=2	0.825309	1	1	1	727	80.902	6.61				1.347	1.257	1.254	1.085	1.832	0.794	0.683	0.622		46.6	49	62.7	58.5	42.1	58.4	50.5	38.4	85.3	61.7
Q3UM18	Lsg1	PE	Large subunit GTPase 1 homolog OS=Mus musculus GN=Lsg1 PE=1 SV=2	1.39752	1	1	1	644	73.111	6.51				1.28	1.292	1.843	0.875	1.746	1.231	1.304	0.568		49	70.8	62.7	63.3	75	90.3	42.8	32.7	85.5	57.5
Q99LC2	Cstf1	PE	Cleavage stimulation factor subunit 1 OS=Mus musculus GN=Cstf1 PE=1 SV=1	2.08817	1	1	1	431	48.351	6.58				1.202	1.048	1.848	1.152	1.742	0.79	0.426	0.566		52.1	65.8	62.6	54.6	35.4	96.2	60	47.1	90.7	83.2
Q9EQH3	Vps35	PE	Vacuolar protein sorting-associated protein 35 OS=Mus musculus GN=Vps35 PE=1 SV=1	1.13065	1	1	1	796	91.655	5.44				1.526	0.983	1.22	1.381	2.572	1.228	0.513	0.565		40.9	70.6	62.3	40.2	29.5	49.8	56.4	32.4	105.1	57.5
P31230	Aimp1	PE	Aminoacyl tRNA synthase complex-interacting multifunctional protein 1 OS=Mus musculus GN=Aimp1 PE=1 SV=2	17.0968	4	4	4	310	33.976	8.35				1.166	0.818	0.939	0.724	1.099	0.758	0.51	0.869		53.4	44.9	62.3	43.7	30.3	50.2	38.7	51.5	58.7	59.3
Q9CWX9	Ddx47	PE	Probable ATP-dependent RNA helicase DDX47 OS=Mus musculus GN=Ddx47 PE=2 SV=2	6.59341	3	3	3	455	50.607	9.1				0.901	0.973	1.033	0.826	1.502	0.861	1.584	0.848		69.1	62.1	62.2	67.2	114.4	71.3	57	61.2	103.8	72.2
Q62191	Trim21	PE	E3 ubiquitin-protein ligase TRIM21 OS=Mus musculus GN=Trim21 PE=1 SV=1	1.48936	1	1	1	470	54.14	7.08				1.722	0.988	1.109	1.582	1.814	0.763	0.81	0.618		36.1	58.7	62.2	35.7	62.4	40	57.1	47.6	65.5	77
Q9CQG2	Mettl16	PE	Methyltransferase-like protein 16 OS=Mus musculus GN=Mettl16 PE=1 SV=1	1.44665	1	1	1	553	62.301	7.36				0.74	0.621	0.44	0.783	0.676	0.446	0.535	0.693		83.9	36.4	62.1	52.2	43.7	36.9	65.8	56.6	56.7	81.7
Q8VCH0	Acaa1b	PE	3-ketoacyl-CoA thiolase B, peroxisomal OS=Mus musculus GN=Acaa1b PE=1 SV=1	9.66981	2	2	2	424	43.968	8.51				0.779	0.943	0.864	1.4	0.711	0.888	0.73	1.018		79.5	63	61.9	75	51.8	68.7	111.3	72.3	56.5	71
O35954	Pitpnm1	PE	Membrane-associated phosphatidylinositol transfer protein 1 OS=Mus musculus GN=Pitpnm1 PE=1 SV=1	0.804505	1	1	1	1243	134.855	6.06				0.737	0.905	0.675	0.749	0.912	1.113	0.727	0.838		84	66.6	61.9	76	43.5	56.7	63	50.1	76.7	59.8
P58389	Ppp2r4	PE	Serine/threonine-protein phosphatase 2A activator OS=Mus musculus GN=Ppp2r4 PE=1 SV=1	7.12074	2	2	2	323	36.687	6.39				1.109	0.8	0.887	1.015	1.258	1.053	0.566	0.78		55.8	72.8	61.9	44.7	39.1	49.5	56.6	54	70.2	69.2
Q9EST5	Anp32b	PE	Acidic leucine-rich nuclear phosphoprotein 32 family member B OS=Mus musculus GN=Anp32b PE=1 SV=1	9.55882	3	6	1	272	31.06	4.01				1.104	0.906	1.462	0.592	2.321	0.977	0.64	0.332		56	87.3	61.9	50.7	57.1	81.9	33.2	29.7	130	89.3
P52332	Jak1	PE	Tyrosine-protein kinase JAK1 OS=Mus musculus GN=Jak1 PE=1 SV=1	3.12229	3	3	3	1153	133.282	7.59				0.997	0.93	1.144	1.041	1.017	1.075	1.107	0.858		62	62.2	61.8	57.7	64.1	70.9	64.5	49.6	63	57.8
Q8VBW5	Bbx	PE	HMG box transcription factor BBX OS=Mus musculus GN=Bbx PE=1 SV=2	0.882029	1	1	1	907	100.72	8.59				1.434	1.1	1.307	1.415	1.435	0.64	1.432	0.918		43.1	31.9	61.8	47.4	71.4	56.3	61	45.8	61.8	49.9
Q91YK2	Rrp1b	PE	Ribosomal RNA processing protein 1 homolog B OS=Mus musculus GN=Rrp1b PE=1 SV=2	2.62431	2	2	2	724	80.532	9.72				0.923	0.99	0.825	0.693	0.792	0.88	3.412	0.911		66.7	69.1	61.6	66	267.9	55.1	46.2	71.5	52.9	78.5
Q80ZM7	Gtf2a2	PE	Transcription initiation factor IIA subunit 2 OS=Mus musculus GN=Gtf2a2 PE=1 SV=2	6.42202	1	1	1	109	12.465	6.62				1.052	1.977	0.857	0.887	1.005	1.527	2.069	1.189		58.6	73.6	61.6	115.9	99.7	50.2	52	57.3	58.9	48.2
Q9CQ92	Fis1	PE	Mitochondrial fission 1 protein OS=Mus musculus GN=Fis1 PE=1 SV=1	15.7895	2	2	2	152	16.998	8.53				1.138	1.215	1.378	1.102	1.562	0.858	0.758	0.526		54.1	68.2	61.5	65.7	60.3	74.5	59.6	41.8	84.4	79.5
Q62203	Sf3a2	PE	Splicing factor 3A subunit 2 OS=Mus musculus GN=Sf3a2 PE=1 SV=2	1.47368	1	1	1	475	49.88	9.54				1.097	2.606	0.907	1.23	1.287	0.979	0.87	0.902		55.9	55.1	61.3	145.7	49	50.7	68.8	50.8	72	56.3
Q8CDN6	Txnl1	PE	Thioredoxin-like protein 1 OS=Mus musculus GN=Txnl1 PE=1 SV=3	2.42215	1	1	1	289	32.217	4.96				1.13	2.63	0.925	0.862	0.994	1.079	0.567	0.559		54	82.8	61	142	43.5	50	46.6	43	53.7	76.8
Q61183	Papola	PE	Poly(A) polymerase alpha OS=Mus musculus GN=Papola PE=1 SV=4	1.75913	1	1	1	739	82.258	7.34				1.553	1.155	1.1	1.03	1.432	1.846	1.023	2.101		39.2	45.9	60.9	45.3	25.4	43.2	40.4	52.2	56.1	24.9
P20060	Hexb	PE	Beta-hexosaminidase subunit beta OS=Mus musculus GN=Hexb PE=1 SV=2	1.49254	1	1	1	536	61.077	8.12				0.849	0.627	1.315	0.551	1.321	1.4	0.88	0.979		71.3	81.3	60.6	44.7	51.1	93.7	39.3	56.8	94.1	58.1
Q80UP3	Dgkz	PE	Diacylglycerol kinase zeta OS=Mus musculus GN=Dgkz PE=1 SV=2	0.753498	1	1	1	929	103.965	8.09				1.103	1.057	1.094	0.767	2.004	0.78	0.931	0.717		54.9	57.1	60.6	58	68.1	60.1	42.1	52.5	110	73.2
P53994	Rab2a	PE	Ras-related protein Rab-2A OS=Mus musculus GN=Rab2a PE=1 SV=1	12.7358	2	2	2	212	23.533	6.54				0.718	1.449	1.136	0.966	0.859	1.632	1.006	0.795		84.2	146.4	60.4	121.9	90.2	95.6	81.2	71.3	72.3	89.7
A2AUM9	Cep152	PE	Centrosomal protein of 152 kDa OS=Mus musculus GN=Cep152 PE=1 SV=1	0.576037	1	1	1	1736	196.411	5.66				1.447	0.539	1.401	0.812	1.25	1.273	1.102	1.684		41.8	46.2	60.4	22.5	40	58.5	33.9	61.1	52.2	36.3
Q8VE88	Fam114a2	PE	Protein FAM114A2 OS=Mus musculus GN=Fam114a2 PE=1 SV=2	1.81087	1	1	1	497	54.011	4.93				1.331	0.955	0.914	0.883	1.701	0.828	0.508	0.756		45.3	48.3	60.3	43.3	29.7	41.4	40	44.1	77.1	58.4
Q6P8I4	Pcnp	PE	PEST proteolytic signal-containing nuclear protein OS=Mus musculus GN=Pcnp PE=1 SV=1	6.17978	1	2	1	178	18.951	7.49				0.841	1.209	1.008	1.187	1.27	0.9	0.539	1.042		71.6	71.1	60.2	86.5	42.5	72.1	84.9	82.3	90.9	79
Q08189	Tgm3	PE	Protein-glutamine gamma-glutamyltransferase E OS=Mus musculus GN=Tgm3 PE=1 SV=2	1.8759	1	2	1	693	77.261	6.81				0.596	0.771	0.787	0.945	0.574	0.969	0.743	1.047		101	76.8	60.2	77.8	58.9	79.5	95.4	83	58	79.2
Q99LI2	Clcc1	PE	Chloride channel CLIC-like protein 1 OS=Mus musculus GN=Clcc1 PE=1 SV=1	1.2987	1	1	1	539	60.582	5.68				0.832	0.907	1.013	1.305	0.943	1.293	0.881	1.274		72.2	101.1	60.1	65.5	68.9	73.2	94.2	99.6	68.1	78.2
Q8R1U1	Cog4	PE	Conserved oligomeric Golgi complex subunit 4 OS=Mus musculus GN=Cog4 PE=1 SV=1	1.01911	1	1	1	785	88.604	5.15				0.869	1.979	1.476	0.577	0.502	1.007	0.76	0.482		69	75.3	60	136.6	56.8	101.9	39.8	36.1	34.7	74.8
Q9CR20	Ier3ip1	PE	Immediate early response 3-interacting protein 1 OS=Mus musculus GN=Ier3ip1 PE=3 SV=1	9.7561	1	1	1	82	9.011	8.22				0.941	0.755	0.57	0.537	0.824	0.85	0.586	0.595		63.8	50.8	60	48.2	35	36.4	34.2	35.5	52.6	59.7
Q9Z210	Pex11b	PE	Peroxisomal membrane protein 11B OS=Mus musculus GN=Pex11b PE=1 SV=1	11.9691	3	3	3	259	28.691	9.95				0.747	1.388	1.08	0.641	0.746	1.101	3.108	0.82		79.9	78.9	59.7	110.9	222.5	86.3	51.2	58.7	59.6	71.6
Q9WUA3	Pfkp	PE	ATP-dependent 6-phosphofructokinase, platelet type OS=Mus musculus GN=Pfkp PE=1 SV=1	0.892857	1	1	1	784	85.4	7.11				1.535	1.478	1.308	0.85	3.218	1.183	0.718	0.77		38.9	64.8	59.7	57.5	39.4	50.9	33.1	42.2	125.1	54.8
O35609	Scamp3	PE	Secretory carrier-associated membrane protein 3 OS=Mus musculus GN=Scamp3 PE=1 SV=3	2.29226	1	1	1	349	38.433	7.64				1.189	0.858	1.261	0.654	2.207	0.979	0.73	0.495		50.1	62.3	59.5	43	46.4	63.1	32.8	31.5	110.5	63.6
Q3UZA1	Rcsd1	PE	CapZ-interacting protein OS=Mus musculus GN=Rcsd1 PE=1 SV=1	1.94175	1	1	1	412	44.087	5.16				0.927	1.141	0.852	1.018	1.189	0.926	0.476	0.861		64	61.2	59.4	73.1	31.4	54.6	65.2	56.9	76.2	66.1
Q9DBF7	Cwc25	PE	Pre-mRNA-splicing factor CWC25 homolog OS=Mus musculus GN=Cwc25 PE=2 SV=2	11.2981	5	5	5	416	48.782	10.23				0.733	0.938	0.764	0.939	0.735	0.724	2.315	0.933		81	58.5	59.4	76	187.2	61.9	76.1	75.5	59.6	80.9
Q8BUM3	Ptpn7	PE	Tyrosine-protein phosphatase non-receptor type 7 OS=Mus musculus GN=Ptpn7 PE=1 SV=1	2.50696	1	1	1	359	40.325	6.7				1.374	1.17	1.318	0.882	2.795	1.089	0.568	0.64		42.9	70.7	59	50.2	36.9	56.6	37.9	41.5	119.9	64.9
Q56A08	Gpkow	PE	G patch domain and KOW motifs-containing protein OS=Mus musculus GN=Gpkow PE=1 SV=2	1.84426	1	1	1	488	53.798	8.07				1.212	1.291	1.272	1.436	1.996	0.959	0.86	0.811		48.6	59.2	58.9	62.7	53	61.8	69.7	50	96.9	61.7
Q8CBY3	Leng8	PE	Leukocyte receptor cluster member 8 homolog OS=Mus musculus GN=Leng8 PE=1 SV=1	1.01911	1	1	1	785	86.712	9.32				1.111	1.309	0.894	1.133	1.415	0.745	0.94	1.013		53	41.6	58.9	69.4	52.5	47.4	60	56.5	74.9	55.8
Q9Z2C4	Mtmr1	PE	Myotubularin-related protein 1 OS=Mus musculus GN=Mtmr1 PE=1 SV=1	2.69058	2	2	2	669	75.266	6.8				0.588	0.874	0.605	0.855	0.684	0.859	0.569	0.914		100.1	65.8	58.8	87.4	43.6	60.6	85.5	69.9	68.5	76.6
Q8CGB3	Uaca	PE	Uveal autoantigen with coiled-coil domains and ankyrin repeats OS=Mus musculus GN=Uaca PE=1 SV=2	0.566974	1	1	1	1411	160.714	7.2				0.774	1.285	1.02	1.116	0.799	1.216	0.851	1.146		75.8	83.6	58.7	97.5	58.6	77.4	84.7	78.8	60.6	68.8
E9QJZ1	Gm16381	PE	Uncharacterized protein OS=Mus musculus GN=Gm16381 PE=4 SV=1	12.3288	1	1	1	73	8.571	8.43				1.83	1.622	1.426	1.538	1.43	0.981	1.732	0.597		32.1	47.5	58.7	52.1	84	45.8	49.4	28.9	45.9	48.5
Q80ZX0	Sec24b	PE	Sec24 related gene family, member B (S. cerevisiae) OS=Mus musculus GN=Sec24b PE=1 SV=1	0.799361	1	1	1	1251	135.465	6.96				1.139	1.296	1.14	1.255	1.416	0.938	0.922	0.911		51.6	60.6	58.7	66.9	59.6	58.8	64.7	58.9	73.1	64.7
P58064	Mrps6	PE	28S ribosomal protein S6, mitochondrial OS=Mus musculus GN=Mrps6 PE=1 SV=3	7.2	1	1	1	125	14.3	9.5				0.889	1.247	1.002	0.743	0.88	0.525	1.047	0.654		65.9	42.3	58.6	82.2	84.4	66.1	48.9	52.7	58	80.6
Q99KC8	Vwa5a	PE	von Willebrand factor A domain-containing protein 5A OS=Mus musculus GN=Vwa5a PE=1 SV=2	2.90038	2	2	2	793	87.087	6.58				1.225	1.871	1.36	1.201	1.926	0.974	0.772	0.737		47.7	69	58.5	89.3	54.7	64.9	57.4	52.2	92	70.8
Q61074	Ppm1g	PE	Protein phosphatase 1G OS=Mus musculus GN=Ppm1g PE=1 SV=3	1.47601	1	1	1	542	58.691	4.39				1.895	1.332	1.933	0.995	2.657	1.267	0.896	0.86		30.8	62.1	58.3	41	43.9	59.5	30.6	42.2	81.8	49
Q91VA7	Idh3b	PE	Isocitrate dehydrogenase [NAD] subunit, mitochondrial OS=Mus musculus GN=Idh3b PE=1 SV=1	4.94792	2	3	2	384	42.168	8.6				0.654	0.834	0.65	0.511	0.746	0.286	0.213	0.31		89	52.1	58.2	74.2	38.8	57.8	45.5	56.4	66.4	182
Q8K3W0	Bre	PE	BRCA1-A complex subunit BRE OS=Mus musculus GN=Bre PE=1 SV=2	6.26632	2	2	2	383	43.517	5.94				0.856	0.902	0.908	0.884	0.919	1.117	0.678	1.082		68.1	65.8	58.2	61.4	39.9	61.8	60.2	63.7	62.5	58.9
Q8BZY3	Ddx19b	PE	DEAD (Asp-Glu-Ala-Asp) box polypeptide 19b OS=Mus musculus GN=Ddx19b PE=1 SV=1	3.23887	2	2	2	494	55.64	8.54				0.981	0.779	1.051	0.802	1.475	0.734	0.743	0.623		59.2	55.3	58.1	46.2	56	62.3	47.5	46.9	87.4	75.3
Q8VE22	Mrps23	PE	28S ribosomal protein S23, mitochondrial OS=Mus musculus GN=Mrps23 PE=1 SV=1	5.64972	1	1	1	177	20.335	8.59				0.817	1.001	0.733	1.222	0.672	0.854	0.904	0.922		70.9	50.8	58	71	53.8	52	86.7	54.9	47.6	59.5
Q8BGT7	Smndc1	PE	Survival of motor neuron-related-splicing factor 30 OS=Mus musculus GN=Smndc1 PE=1 SV=1	3.36134	1	1	1	238	26.737	7.24				0.881	0.722	1.009	0.927	1.196	0.75	1.286	0.682		65.8	54	58	47.5	92.5	66.4	61	49	78.8	71.9
P08032	Spta1	PE	Spectrin alpha chain, erythrocytic 1 OS=Mus musculus GN=Spta1 PE=1 SV=3	0.828157	2	2	2	2415	279.693	5.03				2.099	0.625	1.238	2.167	0.986	0.623	0.455	1.077		27.6	38.3	57.9	17.2	28	34.2	59.8	66.2	27.2	61.5
Q99LF4	Rtcb	PE	tRNA-splicing ligase RtcB homolog OS=Mus musculus GN=Rtcb PE=1 SV=1	7.32673	3	3	3	505	55.214	7.23				1.285	1.57	1.016	1.216	1.357	0.738	0.695	0.748		44.9	38.2	57.6	70.4	36	45.6	54.6	38.7	60.9	51.8
Q8BNU0	Armc6	PE	Armadillo repeat-containing protein 6 OS=Mus musculus GN=Armc6 PE=1 SV=1	1.49573	1	1	1	468	50.651	6				0.736	1.039	0.999	0.392	0.638	0.926	0.713	0.48		78.3	58.9	57.6	81.3	45.3	78.2	30.7	30.5	50	63.6
Q8K2F8	Lsm14a	PE	Protein LSM14 homolog A OS=Mus musculus GN=Lsm14a PE=1 SV=1	3.4632	2	2	1	462	50.515	9.52				0.623	0.685	0.64	0.843	0.843	0.951	3.658	0.898		92.4	66.3	57.6	63.3	254.9	59.2	77.9	62.6	77.9	69.7
Q02248	Ctnnb1	PE	Catenin beta-1 OS=Mus musculus GN=Ctnnb1 PE=1 SV=1	4.09731	4	5	1	781	85.416	5.86				0.92	1.221	1.016	1.253	1.368	0.892	0.958	1.204		62.6	54.2	57.5	76.4	58.2	63.5	78.4	73.1	85.6	60.7
Q9D0F4	Nkap	PE	NF-kappa-B-activating protein OS=Mus musculus GN=Nkap PE=2 SV=1	2.6506	1	1	1	415	47.199	10.13				0.776	1.026	0.824	0.818	0.568	0.701	1.029	0.671		74	47	57.5	75.9	69.1	61	60.6	45	42.1	67.1
Q6ZQ58	Larp1	PE	La-related protein 1 OS=Mus musculus GN=Larp1 PE=1 SV=3	0.746269	1	1	1	1072	121.05	8.79				1.047	0.918	1.217	1.012	1.303	1.091	1.324	0.773		54.6	67.3	57.2	50.1	81.7	66.5	55.3	47.7	71.2	61.7
Q7TQH0	Atxn2l	PE	Ataxin-2-like protein OS=Mus musculus GN=Atxn2l PE=1 SV=1	4.38513	3	3	3	1049	110.58	8.85				1.057	1.225	0.981	1.142	1.887	1.125	0.619	0.826		53.8	74.6	56.9	65.9	41.1	52.8	61.5	54.8	101.6	66.3
A2A432	Cul4b	PE	Cullin-4B OS=Mus musculus GN=Cul4b PE=1 SV=1	0.824742	1	1	1	970	110.63	8.37				1.17	1.792	1.361	1.181	1.259	0.823	0.873	0.403		48.6	50.7	56.9	87.1	53.8	66.1	57.4	24.8	61.2	61.6
Q8R1F9	Rpp40	PE	Ribonuclease P protein subunit p40 OS=Mus musculus GN=Rpp40 PE=2 SV=2	1.92837	1	1	1	363	41.52	6.68				0.921	0.898	1.239	1.342	1.074	0.885	0.911	0.885		61.8	52.4	56.9	55.5	54	76.6	82.9	52.4	66.4	59.2
Q9JJ28	Flii	PE	Protein flightless-1 homolog OS=Mus musculus GN=Flii PE=1 SV=1	0.786782	1	1	1	1271	144.712	6.06				0.977	0.951	1.096	1.184	1.455	1.01	1.011	0.702		58.1	74.1	56.8	55.3	74.2	63.7	68.9	51.5	84.6	73.4
Q9QX47	Son	PE	Protein SON OS=Mus musculus GN=Son PE=1 SV=2	0.327332	1	1	1	2444	265.483	5.6				0.837	1.401	1.063	1.127	1.023	0.719	0.992	1.026		67.9	49.8	56.8	95.1	68.7	72.2	76.5	71	69.5	69.2
Q3UPL0	Sec31a	PE	Protein transport protein Sec31A OS=Mus musculus GN=Sec31a PE=1 SV=2	1.78862	2	2	2	1230	133.486	6.76				1.081	1.182	1.239	1.058	1.583	0.722	0.509	0.586		52.4	56	56.7	61.9	39.5	64.9	55.4	45.4	82.9	77.5
P12382	Pfkl	PE	ATP-dependent 6-phosphofructokinase, liver type OS=Mus musculus GN=Pfkl PE=1 SV=4	3.46154	2	3	2	780	85.305	7.17				0.666	0.628	0.747	0.594	0.672	1.323	0.839	0.758		85.2	98	56.7	53.5	62.1	63.6	50.6	56.1	57.2	74
O70493	Snx12	PE	Sorting nexin-12 OS=Mus musculus GN=Snx12 PE=1 SV=1	6.66667	1	1	1	165	19.104	7.34				0.794	0.739	0.695	0.858	0.883	0.661	0.754	0.751		71.5	44.9	56.7	52.9	51.2	49.7	61.3	51	63.1	67.9
Q8C129	Lnpep	PE	Leucyl-cystinyl aminopeptidase OS=Mus musculus GN=Lnpep PE=1 SV=1	1.85366	2	2	2	1025	117.229	5.96				1.077	1.279	1.246	1.223	1.502	1.331	1.632	1.081		52.6	69.9	56.6	67.3	85.6	65.5	64.3	56.7	79	52.5
Q8BY46	Znf574	PE	Zinc finger protein 574 OS=Mus musculus GN=Znf574 PE=1 SV=1	1	1	1	1	900	99.397	8.1				0.928	0.794	0.772	0.83	0.891	0.852	1.231	0.804		60.8	41.7	56.5	48.3	60.3	47	50.5	39.4	54.2	49
Q8CI51	Pdlim5	PE	PDZ and LIM domain protein 5 OS=Mus musculus GN=Pdlim5 PE=1 SV=4	1.52284	1	1	1	591	63.259	8.25				0.864	0.865	0.799	1.061	1.163	0.856	0.73	0.816		64.8	55.8	56	56.1	47.6	51.8	68.8	53.2	75.4	65.2
Q9D883	U2af1	PE	Splicing factor U2AF 35 kDa subunit OS=Mus musculus GN=U2af1 PE=1 SV=4	5.43933	1	2	1	239	27.797	8.81				1.291	1.177	1.293	0.643	1.758	1.083	0.853	0.539		43.2	60.2	55.8	50.9	47.4	55.9	27.8	29.9	76	55.5
Q9Z2L7	Crlf3	PE	Cytokine receptor-like factor 3 OS=Mus musculus GN=Crlf3 PE=1 SV=1	8.82353	3	3	3	442	49.528	5.03				0.441	0.464	0.501	0.365	0.738	1.328	0.874	0.633		126.4	76.1	55.7	58.6	50.1	63.3	46.2	36.3	93.4	57.3
Q9CQT2	Rbm7	PE	RNA-binding protein 7 OS=Mus musculus GN=Rbm7 PE=1 SV=1	6.79245	2	2	2	265	30.13	9.38				0.824	4.257	1.571	1.222	1.028	1.734	1.126	0.721		67.5	186.7	55.6	287.2	121.3	106	82.4	77.6	69.4	107.7
Q9D880	Timm50	PE	Mitochondrial import inner membrane translocase subunit TIM50 OS=Mus musculus GN=Timm50 PE=1 SV=1	3.11615	1	1	1	353	39.752	8.13				1.398	1.053	1.428	1.255	2.254	0.86	1.308	0.721		39.7	53.6	55.5	41.8	81.5	56.7	49.8	45	89.5	62.3
Q8R0F6	Ilkap	PE	Integrin-linked kinase-associated serine/threonine phosphatase 2C OS=Mus musculus GN=Ilkap PE=1 SV=1	2.29592	1	1	1	392	42.748	7.36				1.455	0.876	1.516	1.115	1.947	0.969	0.647	0.536		38.2	58.4	55.5	33.4	39	57.9	42.6	32.3	74.3	60.3
Q922K7	Nop2	PE	Probable 28S rRNA (cytosine-C(5))-methyltransferase OS=Mus musculus GN=Nop2 PE=1 SV=1	0.75662	1	1	1	793	86.699	9.22				0.778	1.37	1.105	0.84	1.1	0.845	1.11	0.705		71.4	71	55.5	97.8	93.3	78.9	59.9	59.2	78.5	84
Q9CR11	Yeats4	PE	YEATS domain-containing protein 4 OS=Mus musculus GN=Yeats4 PE=2 SV=1	6.60793	1	2	1	227	26.513	8.41				0.827	1.06	0.649	1.261	0.8	0.697	0.738	0.87		66.9	47.1	55.3	70.9	49.8	43.4	84.4	58.7	53.5	67.5
Q922V4	Plrg1	PE	Pleiotropic regulator 1 OS=Mus musculus GN=Plrg1 PE=1 SV=1	1.36452	1	1	1	513	56.902	9.17				1.4	0.769	1.298	1.03	1.343	0.712	0.759	0.961		39.3	32.4	55	30.2	34.5	51.1	40.5	43.7	52.8	45.5
Q9CPP6	Ndufa5	PE	NADH dehydrogenase [ubiquinone] 1 alpha subcomplex subunit 5 OS=Mus musculus GN=Ndufa5 PE=1 SV=3	6.03448	1	1	1	116	13.351	8.1				0.657	0.991	0.708	1.003	1.001	1.022	0.662	0.772		83.8	79.9	55	83	51.8	59.3	84	60.4	83.8	78.2
Q8BG17	Nol12	PE	Nucleolar protein 12 OS=Mus musculus GN=Nol12 PE=1 SV=1	3.22581	1	1	1	217	25.341	10.13				1.202	1.524	1.531	1.241	1.599	1.479	1.903	1.51		45.7	66.1	55	69.7	85	70.1	56.8	67.4	73.2	44.7
Q61466	Smarcd1	PE	SWI/SNF-related matrix-associated actin-dependent regulator of chromatin subfamily D member 1 OS=Mus musculus GN=Smarcd1 PE=1 SV=3	4.85437	2	2	1	515	58.208	9.25				0.796	1.086	0.683	0.77	0.614	1.072	0.542	0.665		69.1	77.7	54.9	75	39.3	47.2	53.2	48.2	42.4	72.5
Q80SW1	Ahcyl1	PE	Putative adenosylhomocysteinase 2 OS=Mus musculus GN=Ahcyl1 PE=1 SV=1	3.58491	2	2	2	530	58.913	6.89				1.534	1.219	1.38	1.722	2.638	0.87	0.734	0.722		35.7	44.9	54.8	43.5	37.9	49.3	61.5	37.3	94.2	51.7
Q8CFE3	Rcor1	PE	REST corepressor 1 OS=Mus musculus GN=Rcor1 PE=1 SV=3	1.45833	1	1	1	480	52.682	7.03				0.992	1.007	0.598	1.906	1.667	0.877	0.608	1.366		55.2	52.6	54.8	55.6	36.5	33	105.3	81.9	92.1	60
Q3TYS2	1	SV	Uncharacterized protein C17orf62 homolog OS=Mus musculus PE=1 SV=2	12.2995	2	2	2	187	20.908	8.59				1.258	1.17	1.186	1.127	2.509	0.955	0.875	0.547		43.5	59.4	54.7	50.9	54.4	51.6	49	34	109.1	62.2
P23298	Prkch	PE	Protein kinase C eta type OS=Mus musculus GN=Prkch PE=1 SV=2	2.19619	2	2	2	683	77.868	7.68				0.818	1.068	1.4	1.054	1.353	0.784	2.957	0.881		66.8	58.5	54.7	71.4	220.7	93.6	70.4	65.8	90.4	74.7
A2AE20	Spaca5	PE	Sperm acrosome-associated protein 5 OS=Mus musculus GN=Spaca5 PE=1 SV=1	3.75	1	1	1	160	17.994	6				0.447	0.665	0.51	0.457	0.397	0.805	0.767	0.627		122.3	84.1	54.7	81.4	80.1	62.4	55.9	65.5	48.6	104.5
Q9CWX4	Rpusd4	PE	RNA pseudouridylate synthase domain-containing protein 4 OS=Mus musculus GN=Rpusd4 PE=2 SV=1	6.36605	3	3	3	377	42.381	10.18				0.895	0.7	1.016	1.043	0.93	0.885	9.2	0.841		61	56.6	54.5	42.6	589	61.9	63.6	53.8	56.7	64
Q8VI36	Pxn	PE	Paxillin OS=Mus musculus GN=Pxn PE=1 SV=1	2.70728	2	2	2	591	64.435	6.02				1.104	2.085	1.142	1.514	1.482	1.107	1.556	1.107		49.1	50.3	54.2	102.5	70.7	56.1	74.4	50.3	72.8	45.4
Q9DBS2	Tprg1l	PE	Tumor protein p63-regulated gene 1-like protein OS=Mus musculus GN=Tprg1l PE=1 SV=1	3.00752	1	1	1	266	29.795	7.37				1.031	1.862	1.504	0.97	2.426	1.023	3.999	0.51		52.5	79.7	54.1	97.8	311.4	79	50.9	39.7	127.4	77.9
A2AQ19	Rtf1	PE	RNA polymerase-associated protein RTF1 homolog OS=Mus musculus GN=Rtf1 PE=1 SV=1	1.67832	1	1	1	715	80.748	8.16				1.133	1.017	1.251	0.873	1.47	1.031	0.979	1.148		47.6	51.9	53.9	48.4	49.2	59.6	41.6	57.8	70	50.3
Q9D1G1	Rab1b	PE	Ras-related protein Rab-1B OS=Mus musculus GN=Rab1b PE=1 SV=1	25.3731	5	7	1	201	22.173	5.73				1.402	1.269	1.294	1.552	1.896	0.863	0.605	0.651		38.2	52.6	53.6	48.5	36.9	49.5	59.3	39.7	72.5	61
Q9WUA2	Farsb	PE	Phenylalanine--tRNA ligase beta subunit OS=Mus musculus GN=Farsb PE=1 SV=2	1.86757	1	1	1	589	65.655	7.12				1.558	1.312	1.409	0.931	2.026	0.937	0.5	0.497		34.4	50.8	53.6	45.2	27.1	48.5	32.1	26.9	69.8	54.2
E9Q9K8	Akap6	PE	A kinase (PRKA) anchor protein 6 OS=Mus musculus GN=Akap6 PE=1 SV=1	0.390117	1	1	1	2307	254.165	5.06				0.72	0.795	0.545	1.45	0.563	0.804	0.61	1.21		74.4	35.6	53.5	59.1	27.1	40.5	107.8	53.7	41.8	44.4
Q4FZF3	Ddx49	PE	Probable ATP-dependent RNA helicase DDX49 OS=Mus musculus GN=Ddx49 PE=2 SV=1	3.75	2	2	2	480	54.06	8.78				0.764	0.792	0.864	0.784	0.748	0.415	1.006	0.436		69.9	51.5	53.4	55.4	124.9	60.4	54.9	54.2	52.3	124.1
Q78ZA7	Nap1l4	PE	Nucleosome assembly protein 1-like 4 OS=Mus musculus GN=Nap1l4 PE=1 SV=1	9.06667	3	3	3	375	42.653	4.67				0.737	0.903	0.793	1.034	0.882	0.921	0.68	0.798		72.4	61.4	53.4	65.5	45.3	57.5	74.9	53.2	63.9	66.7
Q9CWK8	Snx2	PE	Sorting nexin-2 OS=Mus musculus GN=Snx2 PE=1 SV=2	5.78035	2	3	2	519	58.435	5.12				1.238	1.239	1.202	1.221	2.151	0.937	0.528	0.623		43	58.3	53.3	53.3	32.8	51.7	52.5	38.8	92.5	62.2
B5THE2	Mgam	PE	Maltase-glucoamylase OS=Mus musculus GN=Mgam PE=1 SV=1	0.437876	1	1	1	1827	208.417	5.95				0.529	0.756	0.465	1.587	0.572	0.796	0.616	1.084		100.7	47	53.3	76.2	36.4	46.8	159.8	64	57.6	59.1
Q9R0U0	Srsf10	PE	Serine/arginine-rich splicing factor 10 OS=Mus musculus GN=Srsf10 PE=1 SV=2	2.67176	1	1	1	262	31.282	11.27				1.441	1.241	1.17	1.592	1.632	0.701	0.851	0.885		37	41	53.3	45.9	49.8	43.3	58.9	51.8	60.4	58.5
Q9Z1M8	Ik	PE	Protein Red OS=Mus musculus GN=Ik PE=1 SV=2	1.43627	1	1	1	557	65.576	6.64				1.426	1.892	1.648	1.433	1.953	0.711	1.874	0.837		37.3	35.8	53.2	70.5	94.3	61.4	53.4	42.1	72.8	50.3
Q8BSU7	Mob3a	PE	MOB kinase activator 3A OS=Mus musculus GN=Mob3a PE=1 SV=1	4.14747	1	1	1	217	25.536	8.43				0.807	0.98	0.49	0.446	0.689	1.504	1.77	0.71		65.9	49.5	53.2	64.6	58.3	32.3	29.4	23.4	45.4	32.9
Q9WTJ4	Fiz1	PE	Flt3-interacting zinc finger protein 1 OS=Mus musculus GN=Fiz1 PE=1 SV=1	2	1	1	1	500	52.652	7.94				0.833	0.9	0.677	0.879	0.63	0.8	1.355	0.75		63.6	50.9	53	57.3	86.1	43.1	55.9	47.7	40.1	63.6
Q9JL62	Gltp	PE	Glycolipid transfer protein OS=Mus musculus GN=Gltp PE=1 SV=3	4.78469	1	1	1	209	23.674	7.39				1.048	1.185	0.922	0.767	1.099	0.94	0.676	0.73		50.4	50.7	52.8	59.7	36.5	46.5	38.7	39.4	55.4	53.9
P28076	Psmb9	PE	Proteasome subunit beta type-9 OS=Mus musculus GN=Psmb9 PE=1 SV=1	4.56621	1	1	1	219	23.382	5.22				0.908	0.662	0.689	0.59	0.97	1.248	0.469	0.59		58	51.2	52.7	38.4	19.2	40	34.2	24.2	56.3	41
J3QNR8	Trim34b	PE	Tripartite motif-containing 34B OS=Mus musculus GN=Trim34b PE=4 SV=1	1.85567	1	1	1	485	55.715	8.03				0.839	0.789	0.888	1.045	1.156	1.152	2.645	1.102		62.8	56.4	52.7	49.6	129.5	55.8	65.6	54	72.6	49
Q99L47	St13	PE	Hsc70-interacting protein OS=Mus musculus GN=St13 PE=1 SV=1	3.50404	1	1	1	371	41.629	5.26				1.09	1.158	1.556	1.073	1.564	1.138	0.894	0.79		48.3	58.2	52.7	56	45.8	75.2	51.9	40.4	75.6	51.2
Q3U319	Rnf40	PE	E3 ubiquitin-protein ligase BRE1B OS=Mus musculus GN=Rnf40 PE=1 SV=2	0.699301	1	1	1	1001	113.897	6.48				1.429	1.83	1.074	1.23	1.634	1.674	0.723	1.225		36.8	76.1	52.7	67.4	32.8	39.6	45.3	55.7	60.2	45.4
O88271	Cfdp1	PE	Craniofacial development protein 1 OS=Mus musculus GN=Cfdp1 PE=1 SV=1	2.71186	1	1	1	295	32.901	4.86				1.141	1.235	1.123	0.881	1.514	0.697	0.438	0.442		46.1	48.3	52.6	57	30.3	51.8	40.6	30.6	69.8	69.3
Q8BFV2	Pcid2	PE	PCI domain-containing protein 2 OS=Mus musculus GN=Pcid2 PE=1 SV=1	4.01003	1	1	1	399	46.102	8.53				0.979	1.304	1.115	0.869	1.052	1.21	1.154	1.163		53.7	59.5	52.5	70	56.8	59.8	46.6	57.2	56.4	49.2
Q8BRT1	Clasp2	PE	CLIP-associating protein 2 OS=Mus musculus GN=Clasp2 PE=1 SV=1	2.02177	2	2	2	1286	140.652	8.63				0.973	1.344	1.454	1.556	1.147	0.833	0.839	0.818		54	48.7	52.5	72.6	49.1	78.5	84	47.9	61.9	58.5
Q9CRA8	Exosc5	PE	Exosome complex component RRP46 OS=Mus musculus GN=Exosc5 PE=1 SV=1	3.82979	1	1	1	235	25.178	7.56				0.736	1.406	1.2	1.075	1.155	0.985	1.142	0.771		71.2	63.7	52.4	100	73.7	85.4	76.5	49.8	82.2	64.6
Q5U5Q9	Uimc1	PE	BRCA1-A complex subunit RAP80 OS=Mus musculus GN=Uimc1 PE=1 SV=2	1.65062	1	1	1	727	81.427	6.51				0.957	1.105	0.855	1.117	1.359	0.565	0.507	0.723		54.8	40.9	52.4	60.5	36.7	46.8	61.2	52.3	74.5	72.4
Q99JT1	Gatb	PE	Glutamyl-tRNA(Gln) amidotransferase subunit B, mitochondrial OS=Mus musculus GN=Gatb PE=1 SV=1	1.43627	1	1	1	557	62.079	8.54				0.829	1.024	0.777	1.071	0.967	0.802	0.879	1.464		62.9	35.4	52.2	64.4	38.8	48.9	67.4	64.6	60.9	44.1
Q8K0V4	Cnot3	PE	CCR4-NOT transcription complex subunit 3 OS=Mus musculus GN=Cnot3 PE=1 SV=1	1.33156	1	1	1	751	81.896	6.2				0.949	1.066	0.816	0.749	0.834	0.833	0.634	0.549		54.5	46.4	51.8	58.1	35.3	44.5	40.8	30.6	45.5	55.7
P01837	1	SV	Ig kappa chain C region OS=Mus musculus PE=1 SV=1	7.54717	1	1	1	106	11.771	5.41				0.553	1.46	0.668	0.883	0.682	0.441	0.497	0.646		93.7	34.1	51.8	136.8	38.5	62.5	82.7	50	63.9	77.4
Q6IE21	Otud6a	PE	OTU domain-containing protein 6A OS=Mus musculus GN=Otud6a PE=1 SV=1	2.75862	1	1	1	290	33.717	7.34				0.467	0.41	0.85	0.684	0.672	1.17	0.759	1.868		110.9	84.7	51.8	45.5	54.9	94.3	75.9	135.2	74.5	72.4
Q6ZWQ7	Spcs3	PE	Signal peptidase complex subunit 3 OS=Mus musculus GN=Spcs3 PE=1 SV=1	5	1	1	1	180	20.301	8.62				1.328	1.11	1.347	0.741	1.819	1.007	0.662	0.778		39	52.1	51.8	43.3	34.3	52.5	28.9	40.2	70.9	51.7
O88845	Akap10	PE	A-kinase anchor protein 10, mitochondrial OS=Mus musculus GN=Akap10 PE=1 SV=3	1.81269	1	1	1	662	73.586	6.79				0.434	0.504	0.172	0.241	0.084	1.3	0.704	0.619		118.6	30.7	51.5	59.8	16.6	20.4	28.5	14.6	10	23.7
Q8CGP7	Hist1h2ak	PE	Histone H2A type 1-K OS=Mus musculus GN=Hist1h2ak PE=1 SV=3	68.4615	9	104	1	130	14.141	11.05				0.719	1.193	1.329	2.437	0.745	0.544	2.522	0.9		71.4	54.3	51.4	85.3	251.8	95	174.1	89.8	53.2	99.9
Q9QYL7	Abt1	PE	Activator of basal transcription 1 OS=Mus musculus GN=Abt1 PE=2 SV=1	2.97398	1	1	1	269	30.64	10.01				1.584	1.169	1.426	0.995	1.788	1.102	3.204	0.805		32.4	46.5	51.3	37.9	135.1	46.2	32.2	33.9	57.9	42.2
P53995	Anapc1	PE	Anaphase-promoting complex subunit 1 OS=Mus musculus GN=Anapc1 PE=1 SV=2	0.462963	1	1	1	1944	215.855	6.35				0.9	1.025	0.824	0.791	1.028	0.612	0.357	0.557		57	57.5	51.3	58.4	33.5	47	45.1	52.3	58.6	93.9
Q03347	Runx1	PE	Runt-related transcription factor 1 OS=Mus musculus GN=Runx1 PE=1 SV=1	3.54767	2	2	2	451	48.579	9.35				0.695	0.702	0.723	0.632	1.03	0.709	0.849	0.766		73.6	44.3	51.1	51.6	53.1	53.2	46.5	47.9	75.7	62.6
Q9QYJ3	Dnajb1	PE	DnaJ homolog subfamily B member 1 OS=Mus musculus GN=Dnajb1 PE=1 SV=3	7.94118	2	2	2	340	38.143	8.63				0.998	1.215	1.206	1.305	0.97	1.656	1.904	0.9		51	78.4	51	62	90.1	61.6	66.6	42.6	49.5	47.3
P24452	Capg	PE	Macrophage-capping protein OS=Mus musculus GN=Capg PE=1 SV=2	3.69318	1	1	1	352	39.216	7.2				1.836	1.737	2.119	1.133	1.689	1.86	1.082	2.248		27.8	62.1	51	48.3	36.1	58.9	31.5	75	46.9	33.4
P50172	Hsd11b1	PE	Corticosteroid 11-beta-dehydrogenase isozyme 1 OS=Mus musculus GN=Hsd11b1 PE=1 SV=3	2.39726	1	1	1	292	32.343	8.46				0.986	1.881	1.897	0.87	2.085	1.208	1.19	0.34		51.6	125.4	50.8	97	123.5	97.8	44.9	35.3	107.5	103.8
Q3UKJ7	Smu1	PE	WD40 repeat-containing protein SMU1 OS=Mus musculus GN=Smu1 PE=2 SV=2	3.50877	2	2	2	513	57.507	7.18				1.196	1.65	1.122	1.113	1.363	0.751	0.862	0.951		42.4	37.7	50.7	69.9	43.3	47.5	47.2	47.7	57.7	50.2
Q80UY2	Kcmf1	PE	E3 ubiquitin-protein ligase KCMF1 OS=Mus musculus GN=Kcmf1 PE=1 SV=1	2.3622	1	1	1	381	41.765	5.76				0.96	0.884	4.933	0.819	0.939	0.691	1.02	3.296		52.8	35.9	50.7	46.7	52.9	260.4	43.2	170.9	49.6	51.8
Q9D6N5	Drap1	PE	Dr1-associated corepressor OS=Mus musculus GN=Drap1 PE=1 SV=3	13.6585	3	3	3	205	22.264	5.26				0.773	0.646	0.946	0.537	1.565	1.04	0.899	0.767		65.6	55.5	50.7	42.4	48	62.1	35.3	40.9	102.7	53.3
Q9JJA4	Wdr12	PE	Ribosome biogenesis protein WDR12 OS=Mus musculus GN=Wdr12 PE=1 SV=1	1.89125	1	1	1	423	47.317	5.6				0.667	0.808	0.619	0.882	0.728	0.815	0.766	0.608		75.8	60.7	50.6	61.2	57	46.9	66.8	45.2	55.1	74.4
Q64522	Hist2h2ab	PE	Histone H2A type 2-B OS=Mus musculus GN=Hist2h2ab PE=1 SV=3	57.6923	5	38	1	130	14.005	10.89				1.185	1.515	1.561	4.06	1.121	0.53	1.577	0.911		42.7	31.5	50.5	64.6	93.6	66.6	173.1	54.1	47.8	59.4
Q9CXR1	Dhrs7	PE	Dehydrogenase/reductase SDR family member 7 OS=Mus musculus GN=Dhrs7 PE=1 SV=2	2.36686	1	1	1	338	38.143	8.32				0.891	1.403	1.19	1.235	1.482	0.956	1.212	0.738		56.7	64.3	50.5	79.6	81.6	67.5	70	49.6	84.1	67.3
Q9CTH6	Fcf1	PE	rRNA-processing protein FCF1 homolog OS=Mus musculus GN=Fcf1 PE=2 SV=2	4.54545	1	1	1	198	23.325	9.67				0.783	1.007	0.868	0.756	0.975	0.781	0.812	0.739		64.4	55.8	50.4	64.8	58	55.9	48.6	52.8	62.7	71.3
Q62093	Srsf2	PE	Serine/arginine-rich splicing factor 2 OS=Mus musculus GN=Srsf2 PE=1 SV=4	3.61991	1	1	1	221	25.461	11.85				1.432	0.964	1.874	1.095	2.773	1	0.837	0.439		34.9	58	50	33.7	48.5	65.4	38.2	25.5	96.8	58
Q9DCE5	Pak1ip1	PE	p21-activated protein kinase-interacting protein 1 OS=Mus musculus GN=Pak1ip1 PE=1 SV=2	4.45026	2	2	2	382	42.089	8.47				1.005	0.742	1.183	1.22	1.918	1.364	2.562	0.695		49.8	77.6	50	36.9	145.7	58.9	60.8	39.5	95.5	56.9
Q3UI43	Babam1	PE	BRISC and BRCA1-A complex member 1 OS=Mus musculus GN=Babam1 PE=1 SV=1	3.3033	1	1	1	333	36.77	4.55				1.238	0.762	1.215	1	1.665	1.127	0.737	0.763		40.3	56.3	49.9	30.7	36.8	48.9	40.2	38.1	67	50
Q60875	Arhgef2	PE	Rho guanine nucleotide exchange factor 2 OS=Mus musculus GN=Arhgef2 PE=1 SV=4	2.63959	2	2	2	985	111.905	7.25				0.848	0.929	1.016	0.872	1.119	1.006	1.639	1.224		58.8	55.6	49.9	54.6	90.6	59.7	51.3	67.7	65.8	55.3
Q8BI69	Znf784	PE	Zinc finger protein 784 OS=Mus musculus GN=Znf784 PE=2 SV=1	2.3569	1	1	1	297	32.21	8.35				0.575	0.75	0.525	0.634	0.593	1.079	0.496	3.194		86.5	50.7	49.8	64.8	23.3	45.4	54.9	150	51.3	47
F8VQM5	Sis	PE	Sucrase isomaltase (alpha-glucosidase) OS=Mus musculus GN=Sis PE=1 SV=1	0.385039	1	1	1	1818	208.852	6.05				0.959	1.32	1.015	1.162	0.833	1.157	0.942	1.36		52	45.4	49.8	68.6	36.9	52.8	60.4	53.3	43.3	39.2
Q9D937	1	SV	Uncharacterized protein C11orf98 homolog OS=Mus musculus PE=1 SV=1	11.3821	1	1	1	123	14.09	11.47				1.475	1.197	1.457	1.234	1.571	1.183	2.174	1.297		33.7	46.8	49.7	40.3	86.1	49.1	41.6	51.4	52.9	39.6
Q8K2Y9	Ccm2	PE	Cerebral cavernous malformations protein 2 homolog OS=Mus musculus GN=Ccm2 PE=1 SV=1	1.98675	1	1	1	453	49.886	5.62				1.103	1.051	1.051	0.832	1.59	1.22	0.948	0.774		45	64.1	49.7	47.4	49.8	47.3	37.5	40.7	71.6	52.6
Q0V8M9			TREMBL:Q0V8M9;Q9TRI0 (Bos taurus) similar to inter-alpha (globulin) inhibitor H3 isoform 2	0.673401	1	1	1	891	99.475	5.96		Y	Y	0.951	1.243	1.269	1.056	1.324	0.746	0.714	0.704		52.2	53.1	49.7	64.9	50.9	66.2	55.1	50.1	69.1	71.2
Q9CR80	Fam32a	PE	Protein FAM32A OS=Mus musculus GN=Fam32a PE=2 SV=1	19.6429	2	2	2	112	13.207	9.94				0.652	1.173	1.019	1.238	0.939	0.779	2.372	1.007		76	57.3	49.6	89.2	174.5	77.4	94.1	74.1	71.4	73.6
Q8K301	Ddx52	PE	Probable ATP-dependent RNA helicase DDX52 OS=Mus musculus GN=Ddx52 PE=2 SV=2	2.50836	2	2	2	598	67.432	9.57				1.149	1.443	1.226	1.254	1.476	0.829	5.787	0.96		43.1	41.5	49.5	62.2	289.3	52.8	54	48	63.6	50
Q9QXN3	Trip4	PE	Activating signal cointegrator 1 OS=Mus musculus GN=Trip4 PE=1 SV=2	1.0327	1	1	1	581	66.156	7.55				0.597	0.992	0.526	0.824	0.577	0.975	0.624	0.933		82.9	65.3	49.5	82.2	41.8	43.6	68.3	62.4	47.8	66.9
G3X9C2	Nccrp1	PE	F-box only protein 50 OS=Mus musculus GN=Nccrp1 PE=1 SV=2	4.13534	1	2	1	266	30.389	7.12				0.727	0.817	0.693	0.506	0.531	0.769	0.605	0.525		68	47.5	49.4	55.6	37.3	47.1	34.4	32.4	36.1	61.8
Q9D787	Ppil2	PE	Peptidyl-prolyl cis-trans isomerase-like 2 OS=Mus musculus GN=Ppil2 PE=1 SV=2	1.53551	1	1	1	521	59.028	8.38				1.469	0.972	0.878	0.746	1.031	0.799	1.508	0.856		33.5	27.5	49.3	32.6	51.9	29.5	25	29.5	34.6	34.4
Q8CIS0	Card11	PE	Caspase recruitment domain-containing protein 11 OS=Mus musculus GN=Card11 PE=1 SV=2	0.69025	1	1	1	1159	133.956	6.37				0.753	1.194	1.027	1.064	1.031	0.933	0.775	1.137		65.4	51	49.2	78.1	42.3	67.2	69.6	62.1	67.4	54.6
P53810	Pitpna	PE	Phosphatidylinositol transfer protein alpha isoform OS=Mus musculus GN=Pitpna PE=1 SV=2	8.48708	1	2	1	271	31.873	6.37				1.009	0.868	0.983	0.921	1.809	0.911	0.898	0.895		48.7	43.4	49.1	42.3	42.8	47.9	44.9	42.7	88.1	47.7
P49717	Mcm4	PE	DNA replication licensing factor MCM4 OS=Mus musculus GN=Mcm4 PE=1 SV=1	0.928074	1	1	1	862	96.676	7.2				0.872	1.059	0.995	0.768	1.469	0.061	0.053	0.017		56.3	50.9	49.1	59.6	44.6	56	43.2	14.3	82.7	837.8
Q9D7N3	Mrps9	PE	28S ribosomal protein S9, mitochondrial OS=Mus musculus GN=Mrps9 PE=1 SV=3	2.05128	1	1	1	390	44.901	8.81				0.778	1.044	0.886	0.9	0.852	0.879	1.065	1.113		62.9	42.6	49	65.7	51.6	55.7	56.6	53.9	53.6	48.5
Q9JMG1	Edf1	PE	Endothelial differentiation-related factor 1 OS=Mus musculus GN=Edf1 PE=1 SV=1	14.1892	2	2	2	148	16.359	9.99				1.499	2.045	2.155	1.926	2.501	1.151	1.922	1.136		32.6	54.2	48.9	66.8	90.5	70.4	62.9	53.5	81.6	47.1
Q9WTY4	Aqp5	PE	Aquaporin-5 OS=Mus musculus GN=Aqp5 PE=1 SV=1	3.77358	1	1	1	265	28.256	8.62				2.077	1.051	2.482	21.618	0.608	1.506	0.515	0.649		23.4	74	48.7	24.6	25.3	58.1	506.3	31.9	14.2	49.2
E9Q5C9	Nolc1	PE	Nucleolar and coiled-body phosphoprotein 1 OS=Mus musculus GN=Nolc1 PE=2 SV=1	1.28205	1	1	1	702	73.654	9.36				0.738	0.618	0.679	1.353	0.635	0.457	0.578	0.661		66	37.4	48.7	40.8	47.4	44.8	89.3	54.2	41.9	81.9
P13439	Umps	PE	Uridine 5'-monophosphate synthase OS=Mus musculus GN=Umps PE=1 SV=3	1.6632	1	1	1	481	52.259	6.61				1.966	1.26	1.037	0.879	2.13	1.772	0.572	2.141		24.7	74.2	48.5	31.1	24	25.6	21.7	89.7	52.6	41.9
O35343	Kpna4	PE	Importin subunit alpha-3 OS=Mus musculus GN=Kpna4 PE=1 SV=1	1.34357	1	1	1	521	57.887	4.94				1.183	0.881	1.171	0.885	1.315	0.76	0.589	0.943		40.9	26.2	48.4	36	20.3	47.9	36.2	32.5	53.8	34.4
E9Q2I4	Elmsan1	PE	ELM2 and Myb/SANT-like domain-containing 1 OS=Mus musculus GN=Elmsan1 PE=1 SV=1	0.734619	1	1	1	1089	119.646	9.19				1.065	1.121	1.606	1.534	1.611	0.726	1.723	0.732		45.4	47.5	48.3	50.9	112.9	72.9	69.6	48	73.1	65.5
Q9R0Q9	Mpdu1	PE	Mannose-P-dolichol utilization defect 1 protein OS=Mus musculus GN=Mpdu1 PE=1 SV=1	3.64372	1	1	1	247	26.48	8.75				1.016	1.35	0.995	0.558	1.053	1.122	1.009	0.479		47.4	53.3	48.2	64	47.9	47.1	26.4	22.8	49.9	47.5
O35309	Nmi	PE	N-myc-interactor OS=Mus musculus GN=Nmi PE=1 SV=1	4.14013	1	1	1	314	35.213	5.05				1.026	0.655	0.545	0.661	0.651	0.762	0.583	0.848		47	31.3	48.2	30.8	23.9	25.6	31.1	34.8	30.6	41
Q3UMY5	Eml4	PE	Echinoderm microtubule-associated protein-like 4 OS=Mus musculus GN=Eml4 PE=1 SV=1	0.607287	1	1	1	988	109.958	6.54				1.284	1.049	1.632	0.8	2.157	0.76	0.832	0.835		37.3	45.3	47.9	39.1	49.6	60.8	29.8	49.8	80.4	59.7
Q8CHK3	Mboat7	PE	Lysophospholipid acyltransferase 7 OS=Mus musculus GN=Mboat7 PE=1 SV=1	2.32558	1	1	1	473	53.4	8.69				0.519	0.545	0.477	0.823	0.564	1.018	0.881	1.245		92.1	45.1	47.9	50.2	39	44	75.8	55.2	52	44.3
O70572	Smpd2	PE	Sphingomyelin phosphodiesterase 2 OS=Mus musculus GN=Smpd2 PE=1 SV=1	1.90931	1	1	1	419	47.436	6.44				0.773	2.596	0.537	0.933	0.685	2.597	0.748	1.03		61.8	115.9	47.8	160.4	33.4	33.2	57.6	45.9	42.3	44.6
Q9R0P3	Esd	PE	S-formylglutathione hydrolase OS=Mus musculus GN=Esd PE=1 SV=1	2.48227	1	1	1	282	31.299	7.12				0.925	0.993	1.042	0.902	1.486	0.905	0.499	0.774		51.7	56	47.8	51.3	30.9	53.9	46.6	47.9	76.8	61.9
Q8BND4	Ints6l	PE	Integrator complex subunit 6-like OS=Mus musculus GN=Ints6l PE=2 SV=1	0.929152	1	1	1	861	96.879	8.63				0.703	1.019	0.662	0.825	0.597	0.846	0.828	1.183		68	37.3	47.8	69.3	36.5	45.1	56.1	52.1	40.6	44.1
E9Q3L2	Pi4ka	PE	Phosphatidylinositol 4-kinase alpha OS=Mus musculus GN=Pi4ka PE=1 SV=2	0.475059	1	1	1	2105	236.889	7.06				0.629	0.935	1.036	0.743	0.629	1.103	0.892	0.801		75.7	84.3	47.6	70.7	68.2	78.4	56.2	61.2	47.6	76.5
Q8BJF9	Chmp2b	PE	Charged multivesicular body protein 2b OS=Mus musculus GN=Chmp2b PE=1 SV=1	4.22535	1	1	1	213	23.919	8.78				1.294	1.194	1.077	1.549	1.207	1.227	1.259	0.963		36.7	56.4	47.5	43.8	57.9	39.5	56.9	44.3	44.3	46
Q8VD00	Tmem97	PE	Transmembrane protein 97 OS=Mus musculus GN=Tmem97 PE=1 SV=1	4.54545	1	1	1	176	20.797	9.28				1.041	1.054	1.262	1.078	1.193	0.823	1.279	1.207		45.5	31	47.3	47.9	48.2	57.4	49	45.4	54.3	37.6
O35857	Timm44	PE	Mitochondrial import inner membrane translocase subunit TIM44 OS=Mus musculus GN=Timm44 PE=1 SV=2	1.76991	1	1	1	452	51.059	8.13				1.021	1.032	1.045	0.983	1.106	0.939	1.046	0.675		46.1	49.8	47.1	47.6	55.5	48.2	45.4	35.8	51	53
Q04736	Yes1	PE	Tyrosine-protein kinase Yes OS=Mus musculus GN=Yes1 PE=1 SV=3	2.95749	2	3	1	541	60.591	6.64				0.736	1.122	1.151	0.566	0.652	0.908	0.876	0.624		63.6	56.5	46.9	71.4	54.5	73.2	36	38.8	41.5	62.2
Q6ZPZ3	Zc3h4	PE	Zinc finger CCCH domain-containing protein 4 OS=Mus musculus GN=Zc3h4 PE=1 SV=2	2.83742	3	3	3	1304	140.88	6.27				0.796	1.156	0.901	0.951	0.935	0.707	0.598	0.776		58.8	49.1	46.8	68	41.6	53	56	53.9	55	69.5
Q6PHQ8	Naa35	PE	N-alpha-acetyltransferase 35, NatC auxiliary subunit OS=Mus musculus GN=Naa35 PE=1 SV=1	1.10345	1	1	1	725	83.251	7.3				1.039	1.509	1.363	0.667	1.136	1.372	1.362	0.737		45.1	63.3	46.8	68	62.8	61.4	30.1	34	51.2	46.1
Q0VBL3	Rbm15	PE	RNA binding motif protein 15 OS=Mus musculus GN=Rbm15 PE=1 SV=1	2.80665	2	2	2	962	105.658	10.08				1.219	1.808	0.757	1.132	1.632	0.982	0.962	1.075		38.3	45	46.7	69.3	44.1	29	43.4	49.3	62.5	45.8
O55187	Cbx4	PE	E3 SUMO-protein ligase CBX4 OS=Mus musculus GN=Cbx4 PE=1 SV=2	1.45191	1	1	1	551	60.485	9.33				0.644	0.993	2.145	2.161	0.796	1.089	3.429	3.395		72.2	69.4	46.5	71.7	218.8	154.8	156	216.6	57.5	63.8
O35900	Lsm2	PE	U6 snRNA-associated Sm-like protein LSm2 OS=Mus musculus GN=Lsm2 PE=1 SV=1	27.3684	2	2	2	95	10.828	6.52				1.004	1.336	0.882	0.915	1.126	0.695	0.605	0.677		46.2	37.9	46.4	61.7	33	40.8	42.3	36.9	52	54.5
Q9WVE8	Pacsin2	PE	Protein kinase C and casein kinase substrate in neurons protein 2 OS=Mus musculus GN=Pacsin2 PE=1 SV=1	1.85185	1	1	1	486	55.798	5.2				1.065	1.59	1.637	0.966	1.226	0.998	0.733	0.735		43.5	63.3	46.4	69.2	46.5	71.3	42.1	46.6	53.4	63.4
Q9ERL7	Gmfg	PE	Glia maturation factor gamma OS=Mus musculus GN=Gmfg PE=1 SV=1	9.85915	2	2	2	142	16.738	5.71				0.609	0.674	0.652	0.621	1.015	1.045	0.874	1.015		76.1	52.8	46.3	51.3	44.2	49.6	47.3	51.3	77.3	50.5
Q9JHI7	Exosc9	PE	Exosome complex component RRP45 OS=Mus musculus GN=Exosc9 PE=1 SV=1	1.59817	1	1	1	438	48.906	5.11				0.79	0.729	0.633	0.861	0.95	0.992	0.851	0.802		58.6	48.9	46.3	42.7	42	37.1	50.4	39.5	55.6	49.3
Q9EPJ9	Arfgap1	PE	ADP-ribosylation factor GTPase-activating protein 1 OS=Mus musculus GN=Arfgap1 PE=1 SV=2	1.93237	1	1	1	414	45.26	5.57				0.97	0.914	0.775	0.672	0.965	0.84	0.439	0.799		47.5	43.4	46	43.4	22.7	36.8	31.9	41.3	45.8	51.7
Q9CPP0	Npm3	PE	Nucleoplasmin-3 OS=Mus musculus GN=Npm3 PE=1 SV=3	4.57143	1	1	1	175	19.011	4.82				0.967	1.195	0.902	1.092	1.289	0.955	0.899	1.217		47.5	38.1	45.9	56.7	35.9	42.8	51.9	48.6	61.2	39.9
O70370	Ctss	PE	Cathepsin S OS=Mus musculus GN=Ctss PE=1 SV=2	2.05882	1	1	1	340	38.449	6.96				0.913	1.208	0.937	0.759	1.162	2.91	0.92	0.858		50.3	138.4	45.9	60.8	43.8	47.1	38.2	40.8	58.4	47.6
A8C756	Thada	PE	Thyroid adenoma-associated protein homolog OS=Mus musculus GN=Thada PE=1 SV=1	0.825593	2	2	2	1938	217.15	6.25				0.663	1.43	1.038	0.674	0.644	0.956	0.717	0.744		69.1	75	45.8	98.9	56.2	71.7	46.6	58.4	44.5	78.4
P62488	Polr2g	PE	DNA-directed RNA polymerase II subunit RPB7 OS=Mus musculus GN=Polr2g PE=1 SV=1	7.55814	1	1	1	172	19.282	5.54				1.076	1.161	1.492	1.995	1.389	1.072	3.03	1.209		42.6	49.1	45.8	49.4	138.6	63.5	84.9	55.3	59.1	45.7
Q8BTW3	Exosc6	PE	Exosome complex component MTR3 OS=Mus musculus GN=Exosc6 PE=1 SV=1	2.9304	1	1	1	273	28.353	6.11				0.712	0.952	0.738	0.936	0.832	1.197	0.965	1.817		64.4	62.4	45.8	61.3	50.3	47.5	60.3	94.6	53.5	52.1
Q9CZS1	Aldh1b1	PE	Aldehyde dehydrogenase X, mitochondrial OS=Mus musculus GN=Aldh1b1 PE=1 SV=1	6.74374	4	4	3	519	57.516	7.02				0.602	1.278	0.801	0.85	0.883	0.66	0.554	1.004		75.9	37.5	45.7	97	31.5	60.8	64.5	57	67	56.8
Q8C1S0	Med19	PE	Mediator of RNA polymerase II transcription subunit 19 OS=Mus musculus GN=Med19 PE=1 SV=1	4.5082	1	1	1	244	26.247	9.88				0.569	0.796	0.565	0.756	0.512	0.635	0.707	0.982		80.2	35.8	45.7	63.8	39.9	45.3	60.7	55.4	41.1	56.4
P37040	Por	PE	NADPH--cytochrome P450 reductase OS=Mus musculus GN=Por PE=1 SV=2	1.17994	1	1	1	678	76.995	5.53				1.479	1.64	1.661	1.239	2.728	1.211	0.89	0.609		30.9	53.6	45.7	50.7	39.3	51.3	38.3	26.9	84.3	44.2
Q3UMU9	Hdgfrp2	PE	Hepatoma-derived growth factor-related protein 2 OS=Mus musculus GN=Hdgfrp2 PE=1 SV=1	1.64425	1	1	1	669	74.246	8.66				0.871	1.259	0.839	1.025	1.704	0.879	1.08	0.925		52	41.4	45.3	65.5	50.9	43.7	53.3	43.6	88.7	47.2
Q9D8T2	Gsdmdc1	PE	Gasdermin-D OS=Mus musculus GN=Gsdmdc1 PE=1 SV=1	1.84805	1	1	1	487	53.204	5.1				0.984	0.991	0.921	0.939	1.545	0.847	0.428	0.625		45.9	46.6	45.2	45.5	23.6	42.3	43.1	34.4	70.9	55.1
O70311	Nmt2	PE	Glycylpeptide N-tetradecanoyltransferase 2 OS=Mus musculus GN=Nmt2 PE=1 SV=1	1.32325	1	1	1	529	60.446	7.8				2.02	2.062	1.759	1.399	3.642	1.072	0.705	0.812		22.3	44.4	45.1	46	29.2	39.3	31.2	33.6	81.3	41.4
Q810A7	Ddx42	PE	ATP-dependent RNA helicase DDX42 OS=Mus musculus GN=Ddx42 PE=1 SV=3	0.861141	1	1	1	929	101.902	6.98				0.882	1.16	1.053	1.3	1.329	1.214	0.944	0.829		51.1	69.5	45.1	59.3	54.1	53.8	66.5	47.5	68	57.3
Q7TMF3	Ndufa12	PE	NADH dehydrogenase [ubiquinone] 1 alpha subcomplex subunit 12 OS=Mus musculus GN=Ndufa12 PE=1 SV=2	14.4828	2	3	2	145	17.076	9.36				0.914	0.637	0.943	1.019	0.803	0.889	0.719	0.996		49.3	37.9	45	31.4	30.6	46.5	50.2	42.4	39.6	42.6
ENSEMBL:ENSBTAP00000024146			(Bos taurus) similar to alpha-2-macroglobulin isoform 1	0.880162	1	1	1	1477	164.239	6.02		Y	Y	1.529	1.49	1.514	1.014	1.195	1.227	0.921	1.028		29.4	45.9	45	43.8	34.4	44.6	29.8	38.4	35.2	37.4
P11881	Itpr1	PE	Inositol 1,4,5-trisphosphate receptor type 1 OS=Mus musculus GN=Itpr1 PE=1 SV=2	0.254638	1	1	1	2749	312.968	6.04				1.309	1.878	1.424	0.858	1.651	0.915	0.981	0.86		34.3	42.2	44.9	64.4	45.2	48.8	29.4	39.7	56.6	46.1
Q5U4D9	Thoc6	PE	THO complex subunit 6 homolog OS=Mus musculus GN=Thoc6 PE=1 SV=1	2.93255	1	1	1	341	37.291	7.12				0.874	0.878	0.973	1.253	1.17	0.919	0.693	1.053		51.2	49.5	44.8	45	37.3	49.9	64.2	56.7	59.9	53.8
Q9DBZ5	Eif3k	PE	Eukaryotic translation initiation factor 3 subunit K OS=Mus musculus GN=Eif3k PE=1 SV=1	3.21101	1	1	1	218	25.07	4.93				1.289	1.485	1.283	1.095	1.529	1.073	0.722	0.897		34.8	45.3	44.8	51.6	30.5	44.6	38	37.9	53.1	42.2
A2ASS6	Ttn	PE	Titin OS=Mus musculus GN=Ttn PE=1 SV=1	0.0482776	2	2	1	35213	3904.05	6.2				1.429	1.824	2.054	0.879	1.111	1.124	1.209	0.816		31.2	43.2	44.6	56.9	46.4	64.1	27.4	31.4	34.7	38.4
Q9WVH4	Foxo3	PE	Forkhead box protein O3 OS=Mus musculus GN=Foxo3 PE=1 SV=1	1.19048	1	1	1	672	71.02	5.12				1.123	0.956	1.236	0.858	1.648	1.117	1.216	0.807		39.6	48.7	44.4	37.8	53	48.9	34	35.2	65.2	43.6
P70245	Ebp	PE	3-beta-hydroxysteroid-Delta(8),Delta(7)-isomerase OS=Mus musculus GN=Ebp PE=1 SV=3	4.34783	1	1	1	230	26.198	7.56				2.394	1.342	1.869	0.638	3.736	0.989	0.506	0.386		18.5	39.4	44.4	24.9	20.1	34.7	11.8	15.4	69.3	39.8
Q8K0D0	Cdk17	PE	Cyclin-dependent kinase 17 OS=Mus musculus GN=Cdk17 PE=1 SV=2	5.92734	3	4	2	523	59.469	9.03				1.596	0.735	1.402	1.052	1.393	1.579	4.487	2.272		27.7	35.7	44.2	20.4	101.3	38.8	29.1	51.3	38.6	22.6
Q8BXV2	Bri3bp	PE	BRI3-binding protein OS=Mus musculus GN=Bri3bp PE=1 SV=1	2.7668	1	1	1	253	28.245	9.52				1.083	1.123	1.5	0.883	1.882	0.99	0.985	0.78		40.8	51.3	44.2	45.8	51.1	61.2	36.1	40.5	76.8	51.9
Q3ULW8	Parp3	PE	Poly [ADP-ribose] polymerase OS=Mus musculus GN=Parp3 PE=1 SV=1	4.50281	2	2	2	533	59.911	7.12				1.302	1.568	1.69	1.131	2.675	0.869	0.741	0.775		33.7	46.8	43.9	52.9	39.9	57	38.2	41.7	90.3	53.8
Q8R035	Mrpl58	PE	Peptidyl-tRNA hydrolase ICT1, mitochondrial OS=Mus musculus GN=Mrpl58 PE=1 SV=1	4.85437	1	1	1	206	23.462	10.18				1.147	1.188	1.463	1.212	1.302	1.336	4.688	1.824		38.3	43.1	43.9	45.5	151.1	56.1	46.4	58.8	49.9	32.2
P27573	Mpz	PE	Myelin protein P0 OS=Mus musculus GN=Mpz PE=1 SV=1	3.22581	1	1	1	248	27.604	9.47				1.093	1.241	1.192	1.226	1.047	0.791	0.791	0.79		40.1	46.4	43.8	49.8	46.4	47.8	49.2	46.3	42	58.7
Q5M8N4	Sdr39u1	PE	Epimerase family protein SDR39U1 OS=Mus musculus GN=Sdr39u1 PE=1 SV=1	4.22078	1	1	1	308	32.974	8.91				0.671	0.664	0.486	0.355	0.528	0.925	0.541	0.896		65	31.8	43.7	43.2	18.6	31.6	23.1	30.8	34.3	34.4
Q6PGG6	Gnl3l	PE	Guanine nucleotide-binding protein-like 3-like protein OS=Mus musculus GN=Gnl3l PE=1 SV=1	1.21317	1	1	1	577	65.153	8.6				0.822	1.003	0.586	0.843	0.734	1.185	1.998	1.188		53	49.2	43.6	53.2	83	31.1	44.7	49.3	38.9	41.5
Q8BZM1	Glmn	PE	Glomulin OS=Mus musculus GN=Glmn PE=1 SV=1	1.84564	1	1	1	596	67.712	5.06				0.905	1.468	1.458	0.9	0.973	0.956	0.984	0.832		48	47.6	43.4	70.4	49.1	69.9	43.1	41.5	46.7	49.8
Q9D517	Agpat3	PE	1-acyl-sn-glycerol-3-phosphate acyltransferase gamma OS=Mus musculus GN=Agpat3 PE=1 SV=2	2.65957	1	1	1	376	43.268	8.51				0.791	1.067	1.286	0.572	1.314	1.043	1.523	0.583		54.7	62.4	43.3	58.4	91.1	70.4	31.3	34.9	71.9	59.8
Q9D1N9	Mrpl21	PE	39S ribosomal protein L21, mitochondrial OS=Mus musculus GN=Mrpl21 PE=1 SV=1	3.82775	1	1	1	209	23.352	9.99				0.974	1.149	1.144	1.069	1.156	0.726	0.9	0.802		44.5	34.9	43.3	51.1	43.3	50.8	47.5	38.6	51.4	48.1
O08808	Diaph1	PE	Protein diaphanous homolog 1 OS=Mus musculus GN=Diaph1 PE=1 SV=1	0.557769	1	1	1	1255	139.255	5.57				1.328	1.306	1.469	0.66	2.966	0.753	0.689	0.648		32.5	38.7	43.2	42.5	35.4	47.8	21.5	33.3	96.4	51.5
Q8K0D2	Habp2	PE	Hyaluronan-binding protein 2 OS=Mus musculus GN=Habp2 PE=1 SV=2	1.6129	1	1	1	558	62.316	6.37				0.728	0.943	0.919	0.706	1.053	1.306	0.871	0.719		59.1	62.4	43	55.7	41.6	54.3	41.7	34.4	62.2	47.8
Q9DCD2	Xab2	PE	Pre-mRNA-splicing factor SYF1 OS=Mus musculus GN=Xab2 PE=1 SV=1	1.05263	1	1	1	855	99.924	6.23				0.798	1.594	1.094	1.223	1.013	0.737	0.988	0.772		53.8	41.3	42.9	85.8	55.4	58.9	65.8	43.3	54.5	56.1
Q9JMH6	Txnrd1	PE	Thioredoxin reductase 1, cytoplasmic OS=Mus musculus GN=Txnrd1 PE=1 SV=3	1.30506	1	1	1	613	67.042	7.44				1.114	0.551	1.115	0.691	2.935	0.743	0.527	0.781		38.4	38.7	42.7	21.1	27.5	42.8	26.5	40.6	112.6	52.1
P20444	Prkca	PE	Protein kinase C alpha type OS=Mus musculus GN=Prkca PE=1 SV=3	0.892857	1	1	1	672	76.802	7.14				0.962	1.537	1.057	1.04	1.538	0.934	0.795	0.928		44.2	48.4	42.5	67.9	41.2	46.6	45.9	48.1	67.9	51.8
Q8BGQ7	Aars	PE	Alanine--tRNA ligase, cytoplasmic OS=Mus musculus GN=Aars PE=1 SV=1	1.54959	2	2	2	968	106.841	5.67				0.755	0.845	0.907	0.925	1.682	0.747	0.499	0.568		56.3	57	42.5	47.6	38	51.1	52.1	43.3	94.7	76.3
Q8C7X2	Emc1	PE	ER membrane protein complex subunit 1 OS=Mus musculus GN=Emc1 PE=1 SV=1	0.902708	1	1	1	997	111.535	7.43				0.862	0.627	0.703	0.317	1.099	0.69	0.48	0.682		49	36.2	42.3	30.8	25.1	34.5	15.5	35.7	53.9	52.4
P63321	Rala	PE	Ras-related protein Ral-A OS=Mus musculus GN=Rala PE=1 SV=1	3.39806	1	1	1	206	23.538	7.11				0.649	0.556	0.851	0.726	1.188	1.016	1.527	1.054		65.2	54	42.3	36.2	81.2	55.5	47.3	56.1	77.4	53.2
Q9JJW0	Pxmp4	PE	Peroxisomal membrane protein 4 OS=Mus musculus GN=Pxmp4 PE=1 SV=3	6.60377	2	2	2	212	24.181	9.83				0.358	0.647	0.462	0.494	0.419	1.018	2.808	1.232		118	52.9	42.2	76.3	145.8	54.5	58.3	64	49.4	51.9
Q922E4	Pcyt2	PE	Ethanolamine-phosphate cytidylyltransferase OS=Mus musculus GN=Pcyt2 PE=1 SV=1	1.9802	1	1	1	404	45.207	6.58				1.063	1.009	0.931	1.125	1.063	0.914	0.442	0.928		39.6	42.5	42.1	40	20.6	36.9	44.6	43.2	42.1	46.5
P51174	Acadl	PE	Long-chain specific acyl-CoA dehydrogenase, mitochondrial OS=Mus musculus GN=Acadl PE=1 SV=2	3.02326	1	1	1	430	47.877	8.31				0.991	2.285	1.261	0.997	1.275	0.945	1.102	0.968		42.4	49.2	42	96.8	57.4	53.4	42.3	50.4	54	52.1
Q640N3	Arhgap30	PE	Rho GTPase-activating protein 30 OS=Mus musculus GN=Arhgap30 PE=1 SV=3	1.81653	2	2	2	1101	120.04	4.84				1.652	0.878	1.315	1.356	1.351	0.687	0.55	0.746		25.4	39.6	42	22.3	31.7	33.4	34.5	43	34.3	57.6
E9Q2S6	Zfp780b	PE	Zinc finger protein 780B OS=Mus musculus GN=Zfp780b PE=3 SV=1	0.744417	1	1	1	806	92.995	8.44				0.659	1.026	0.789	0.343	0.641	0.589	0.783	0.477		63.7	46.3	42	65.4	61.5	50.3	21.8	37.5	40.8	78.6
Q3U2A8	Vars2	PE	Valine--tRNA ligase, mitochondrial OS=Mus musculus GN=Vars2 PE=1 SV=2	0.660377	1	1	1	1060	118.386	7.14				0.678	1.103	0.917	1.076	0.809	0.717	0.635	1.015		62	35.2	42	68.4	31.2	56.8	66.7	49.8	50.1	49.1
Q8VDJ3	Hdlbp	PE	Vigilin OS=Mus musculus GN=Hdlbp PE=1 SV=1	0.55205	1	1	1	1268	141.655	6.87				1.12	0.943	0.829	1.046	1.024	0.686	0.695	0.607		37.4	25.8	41.9	35.3	26.1	31	39.1	22.8	38.3	37.6
Q9CPX7	Mrps16	PE	28S ribosomal protein S16, mitochondrial OS=Mus musculus GN=Mrps16 PE=1 SV=1	5.92593	1	1	1	135	15.182	9.67				0.847	0.974	1.044	1.458	0.9	1.265	1.119	1.086		49.3	44	41.7	48	38.9	51.4	71.8	37.8	44.3	34.8
Q6IFX4	Krt39	PE	Keratin, type I cytoskeletal 39 OS=Mus musculus GN=Krt39 PE=2 SV=2	1.45228	1	1	1	482	54.253	5.24	Y	Y	Y	100	100	100		100	37.777	22.207	42.793			48.2	41.7	0.1	28.3	40.5		54.6	49.4	1.3
P70268	Pkn1	PE	Serine/threonine-protein kinase N1 OS=Mus musculus GN=Pkn1 PE=1 SV=3	0.739958	1	1	1	946	104.346	6.27				1.425	1.261	1.488	0.921	2.21	1.373	0.848	0.946		29.1	58.5	41.5	36.7	36.2	43.3	26.8	40.4	64.4	42.6
Q9CS42	Prps2	PE	Ribose-phosphate pyrophosphokinase 2 OS=Mus musculus GN=Prps2 PE=1 SV=4	8.1761	3	3	1	318	34.764	6.61				1.193	0.724	1.212	0.678	1.969	1.157	0.801	0.694		34.5	43.2	41.2	25	29.9	41.9	23.4	25.9	68	37.3
A2AIX1	Sec16a	PE	SEC16 homolog A, endoplasmic reticulum export factor OS=Mus musculus GN=Sec16a PE=1 SV=1	0.883467	2	2	2	2377	256.314	5.87				1.456	1.538	1.863	3.259	1.597	1.264	1.033	1.571		28.2	39.5	41.1	43.4	32.3	52.6	91.9	49.1	45.1	31.2
Q5NCB3	Gm5431	PE	Uncharacterized protein OS=Mus musculus GN=Gm5431 PE=1 SV=1	3.43602	4	6	1	844	95.397	6.06				0.85	0.925	0.991	0.772	0.983	0.927	0.765	0.914		48.3	40.6	41	44.6	33.5	47.8	37.3	40	47.4	43.8
Q8BGA7	2	SV	Uncharacterized protein C7orf26 homolog OS=Mus musculus PE=2 SV=1	1.78571	1	1	1	448	49.876	7.52				0.951	1.319	0.992	0.86	1.505	1.473	0.72	0.931		43.1	65.2	40.9	56.8	31.9	42.7	37	41.2	64.8	44.3
Q61699	Hsph1	PE	Heat shock protein 105 kDa OS=Mus musculus GN=Hsph1 PE=1 SV=2	1.04895	1	1	1	858	96.346	5.53				1.987	2.342	2.281	1.363	3.115	3.301	0.554	0.904		20.6	143	40.9	48.2	24	47	28.1	39.2	64.1	43.3
Q9D6J6	Ndufv2	PE	NADH dehydrogenase [ubiquinone] flavoprotein 2, mitochondrial OS=Mus musculus GN=Ndufv2 PE=1 SV=2	4.43548	1	1	1	248	27.268	7.4				0.823	1.208	1.057	1.074	1.239	1.057	0.994	0.745		49.5	53.7	40.7	59.8	50.5	52.3	53.1	37.9	61.3	50.8
Q9D2V8	Mfsd10	PE	Major facilitator superfamily domain-containing protein 10 OS=Mus musculus GN=Mfsd10 PE=1 SV=1	1.53509	1	1	1	456	49.337	9.95				0.732	0.976	0.971	0.622	1.431	1.03	1.492	0.641		55.5	54.7	40.7	54.2	79.2	53.9	34.6	34	79.5	53.1
P63280	Ube2i	PE	SUMO-conjugating enzyme UBC9 OS=Mus musculus GN=Ube2i PE=1 SV=1	7.59494	1	1	1	158	17.995	8.66				1.301	2.767	2.129	1.373	1.326	1.216	0.939	1.007		31.2	51.3	40.6	86.3	39.6	66.4	42.8	42.5	41.4	42.2
Q9CQV7	Dnajc19	PE	Mitochondrial import inner membrane translocase subunit TIM14 OS=Mus musculus GN=Dnajc19 PE=1 SV=3	12.069	1	1	1	116	12.429	10.1				0.744	0.978	1.106	0.916	0.771	0.505	0.957	0.48		54.5	57.3	40.5	53.3	108.6	60.3	50	54.5	42.1	113.5
P54728	Rad23b	PE	UV excision repair protein RAD23 homolog B OS=Mus musculus GN=Rad23b PE=1 SV=2	6.73077	2	2	2	416	43.486	4.83				1.209	1.649	1.34	1.157	1.696	1.181	0.713	0.85		33.5	52.2	40.5	55.2	31.5	44.9	38.7	37.6	56.8	44.2
Q9CZU4	Eral1	PE	GTPase Era, mitochondrial OS=Mus musculus GN=Eral1 PE=2 SV=1	2.28833	1	1	1	437	48.157	8.78				0.634	0.781	0.616	0.95	0.736	0.546	0.823	0.817		63.8	32.3	40.4	49.9	48.7	39.3	60.6	48.3	46.9	59.1
[truncated: 313 more rows]

## Sheet: Ttest_p110dstim vs ctrlstim
nT1-C-stim	nT2-C-stim	nT3-C-stim	nT1-delta-stim	nT2-delta-stim	nT3-delta-stim	C: contaminant	C: species	C: Student's T-test Significant p110d stim_Ctrl stim FDR=0.21	C: Student's T-test significant	N: % sequence coverage	N: # Peptides	N: # PSMs	N: # Unique Peptides	N: # AAs	N: MW [kDa]	N: calc. pI	N: -Log Student's T-test p-value p110d stim_Ctrl stim	p value (green circle indicates p ≤0.05; shaded green indicates ALSO ≥1.5x-enriched)	N: Student's T-test q-value p110d stim_Ctrl stim	N: Student's T-test Difference p110d stim_Ctrl stim	geoMean fold difference (shaded green indicates ≥1.5x-enriched AND p≤0.05)	N: Student's T-test Test statistic p110d stim_Ctrl stim	T: UniProt Accession	Protein Name	T: Gene Name	T: Description
[truncated: 1,994 more rows]

[truncated: 3 more sheets: All >1.5-fold p<0.05, Ttest_p110dunstim vs ctrlstim, Ttest_p110dstim vs p110dunstim]
